# Supplementary material for: Immune dysregulation and prognostic signatures associated with Epstein–Barr virus in acute lymphoblastic leukemia: an integrated transcriptomic and single-cell analysis
Source: Research Square preprint supplement (doi:10.21203/rs.3.rs-7725271/v1), 2025-10-22
Supplement: Supplementary file 1 [file 858df6071a76191f64562bca.xlsx]

## Sheet: S1 Table 
Supplementary Table S1. Differentially expressed genes (DEGs) identified between EBV-infected and normal control samples (GSE45918 and GSE85599)
Gene symbol	logFC	AveExpr	t	P.Value	adj.P.Val	B
IER3	-3.05255	8.77238	-11.4448	8.32E-13	6.88E-09	19.0498
RARRES3	1.67621	9.0593	11.3816	9.59E-13	6.88E-09	18.9155
OSM	-3.00065	7.35212	-10.8253	3.43E-12	1.64E-08	17.7076
PSME2	1.60402	9.6018	10.3683	1.01E-11	3.21E-08	16.6831
IL8	-3.4308	10.3766	-10.3242	1.12E-11	3.21E-08	16.5826
PSMA4	1.03385	8.98613	10.1257	1.81E-11	4.32E-08	16.1271
PTGS2	-3.94553	8.6842	-9.7152	4.92E-11	8.61E-08	15.1673
TPX2	2.39646	5.90502	9.66857	5.52E-11	8.61E-08	15.0568
IDH2	1.87909	8.46844	9.65748	5.68E-11	8.61E-08	15.0304
CCNA2	3.12722	6.54041	9.63529	6.00E-11	8.61E-08	14.9777
CXCL2	-2.36492	6.28067	-9.59108	6.70E-11	8.74E-08	14.8724
PSMB10	0.773364	9.52096	9.47059	9.05E-11	1.00E-07	14.5839
PRR11	1.72887	5.69518	9.4689	9.08E-11	1.00E-07	14.5798
PRPS2	0.99725	7.42952	9.41565	1.04E-10	1.06E-07	14.4517
DTL	2.36909	5.52338	9.37716	1.14E-10	1.09E-07	14.3588
IL12RB1	0.836264	7.1157	9.30685	1.37E-10	1.18E-07	14.1885
NUSAP1	2.37284	6.49367	9.275	1.48E-10	1.18E-07	14.1112
IRS2	-2.1228	7.34129	-9.27441	1.48E-10	1.18E-07	14.1098
TOP2A	2.87854	6.42547	9.24596	1.59E-10	1.20E-07	14.0405
G0S2	-2.5834	8.18014	-9.16282	1.97E-10	1.37E-07	13.8376
AFF3	-0.922274	5.61535	-9.14331	2.07E-10	1.37E-07	13.7898
IL1B	-3.45171	9.28472	-9.13736	2.10E-10	1.37E-07	13.7752
KIF11	2.59739	5.7724	9.06303	2.54E-10	1.58E-07	13.5927
IL23A	-0.847597	5.14237	-9.03575	2.72E-10	1.63E-07	13.5255
CD79A	-1.56808	8.74647	-9.01113	2.90E-10	1.66E-07	13.4648
MCM4	2.16324	6.67244	8.9651	3.26E-10	1.80E-07	13.351
CUL1	0.784378	7.49663	8.92846	3.58E-10	1.85E-07	13.2603
MTHFD1	1.60999	6.27397	8.92633	3.60E-10	1.85E-07	13.255
CDCA7	2.43679	6.02282	8.7901	5.12E-10	2.50E-07	12.9158
TRIM39	-0.705289	5.93688	-8.78225	5.23E-10	2.50E-07	12.8961
DECR1	0.733475	7.14447	8.7551	5.61E-10	2.60E-07	12.8282
CENPF	1.79221	5.10236	8.71796	6.18E-10	2.68E-07	12.7351
HMGB2	1.41922	8.69345	8.71163	6.28E-10	2.68E-07	12.7192
PCNA	2.05072	7.02684	8.70666	6.36E-10	2.68E-07	12.7067
KIF23	1.37988	4.82766	8.66079	7.17E-10	2.94E-07	12.5914
ZFP36L1	-1.05181	8.48476	-8.6316	7.73E-10	3.08E-07	12.5178
IL4R	-1.07258	7.55053	-8.62152	7.94E-10	3.08E-07	12.4924
TYMS	2.99328	7.63688	8.5553	9.44E-10	3.46E-07	12.325
ACAA2	1.38052	7.10086	8.54157	9.79E-10	3.46E-07	12.2902
CD83	-2.42196	8.3925	-8.53992	9.83E-10	3.46E-07	12.2861
MT1F	1.75979	8.17825	8.52961	1.01E-09	3.46E-07	12.2599
CD38	2.03631	7.82109	8.52769	1.02E-09	3.46E-07	12.255
RIN2	-1.88959	6.80615	-8.51974	1.04E-09	3.46E-07	12.2349
SLC27A2	2.00832	5.46703	8.41314	1.37E-09	4.41E-07	11.9636
THBS1	-3.11322	7.3743	-8.40282	1.41E-09	4.41E-07	11.9373
PSMA5	1.007	7.92186	8.40164	1.42E-09	4.41E-07	11.9343
MCM5	1.74116	7.9604	8.37541	1.52E-09	4.63E-07	11.8673
CTSC	1.15586	8.01682	8.35834	1.59E-09	4.70E-07	11.8236
PHLDA1	-1.39362	5.79659	-8.3539	1.61E-09	4.70E-07	11.8122
BCL2	-1.33899	7.1577	-8.34071	1.66E-09	4.77E-07	11.7785
CCR7	-1.69244	9.36071	-8.31666	1.77E-09	4.92E-07	11.7168
TCF4	-0.956362	5.58229	-8.31225	1.79E-09	4.92E-07	11.7055
CNDP2	0.762201	8.66027	8.30693	1.82E-09	4.92E-07	11.6918
IL32	1.53933	8.89656	8.24014	2.17E-09	5.77E-07	11.5201
STOM	1.04834	8.86256	8.20931	2.36E-09	6.15E-07	11.4407
MCM3	1.76843	8.43546	8.18785	2.50E-09	6.40E-07	11.3853
STRN	0.870755	6.07708	8.16288	2.67E-09	6.62E-07	11.3208
C5AR1	-2.1931	7.84829	-8.16204	2.67E-09	6.62E-07	11.3186
GZMH	2.4621	9.74366	8.12781	2.93E-09	7.06E-07	11.23
FOXM1	1.73626	5.38707	8.12187	2.98E-09	7.06E-07	11.2146
MKI67	2.48427	6.05956	8.11881	3.00E-09	7.06E-07	11.2067
SCD	1.55194	6.82227	8.10167	3.14E-09	7.28E-07	11.1622
CSF3R	-2.04273	8.6774	-8.07175	3.41E-09	7.76E-07	11.0846
LMNB1	1.31339	7.66286	8.05652	3.55E-09	7.96E-07	11.045
FRG1	0.682734	7.76823	8.05051	3.61E-09	7.96E-07	11.0294
DARS2	1.05062	5.18662	8.04159	3.69E-09	8.00E-07	11.0062
ASPM	2.09778	5.32397	8.02947	3.82E-09	8.00E-07	10.9746
PSME1	0.941279	10.3861	8.02911	3.82E-09	8.00E-07	10.9737
VEGFA	-1.2256	6.01613	-8.02641	3.85E-09	8.00E-07	10.9667
SLC43A2	-1.39353	7.80996	-8.01947	3.92E-09	8.04E-07	10.9486
MCM6	1.97683	7.83794	7.95871	4.62E-09	9.18E-07	10.7901
STK39	1.49317	7.64635	7.9549	4.66E-09	9.18E-07	10.7802
RRM2	2.05027	6.262	7.95441	4.67E-09	9.18E-07	10.7789
CARHSP1	1.10426	7.68585	7.91413	5.21E-09	1.01E-06	10.6735
ANLN	1.27368	4.85054	7.88118	5.69E-09	1.09E-06	10.5872
POLA1	1.25128	5.58472	7.8776	5.75E-09	1.09E-06	10.5778
RNASEH2A	1.19007	5.96726	7.86995	5.87E-09	1.09E-06	10.5577
RRM1	1.66795	7.69714	7.85647	6.09E-09	1.12E-06	10.5223
CPSF3	0.858291	7.23607	7.85102	6.18E-09	1.12E-06	10.508
UBE2L6	0.818931	9.02416	7.83396	6.47E-09	1.16E-06	10.4632
SMC4	1.57466	6.95026	7.83073	6.53E-09	1.16E-06	10.4547
CDC7	1.44987	5.47551	7.82255	6.67E-09	1.17E-06	10.4332
OAS2	0.942069	8.52041	7.79393	7.21E-09	1.23E-06	10.3579
MMP25	-0.873462	5.62221	-7.79202	7.25E-09	1.23E-06	10.3528
NFKBIZ	-1.6938	9.67763	-7.78881	7.31E-09	1.23E-06	10.3444
TUBG1	1.29238	6.46758	7.78191	7.45E-09	1.24E-06	10.3262
PLAUR	-2.41043	8.44146	-7.76276	7.85E-09	1.29E-06	10.2757
FOSB	-1.62215	9.88528	-7.73999	8.35E-09	1.36E-06	10.2156
TRIB1	-1.76417	8.63654	-7.73213	8.53E-09	1.36E-06	10.1949
MCM10	1.72879	5.05495	7.73017	8.58E-09	1.36E-06	10.1897
SWAP70	-1.40583	7.11104	-7.72799	8.63E-09	1.36E-06	10.184
PRIM1	1.62298	6.35848	7.72165	8.78E-09	1.37E-06	10.1672
PYHIN1	1.71148	8.06857	7.69338	9.48E-09	1.45E-06	10.0924
TUBB	1.37181	10.0427	7.69271	9.50E-09	1.45E-06	10.0907
TREM1	-2.33131	7.07611	-7.68367	9.74E-09	1.45E-06	10.0668
PSAT1	1.32237	5.31877	7.67905	9.86E-09	1.45E-06	10.0545
PSMC3	0.760837	7.79025	7.67658	9.93E-09	1.45E-06	10.048
CXCL16	-1.8183	8.38045	-7.67642	9.93E-09	1.45E-06	10.0475
ZWILCH	1.28769	5.70838	7.6638	1.03E-08	1.49E-06	10.0141
GART	1.00046	5.87011	7.65538	1.05E-08	1.51E-06	9.99181
DPP3	1.10122	6.37739	7.6348	1.11E-08	1.58E-06	9.93721
GBP5	1.63986	9.8613	7.61355	1.18E-08	1.64E-06	9.88079
BACH2	-1.10998	6.60927	-7.61336	1.18E-08	1.64E-06	9.8803
TOPBP1	0.850486	7.07466	7.61085	1.19E-08	1.64E-06	9.87364
POLA2	1.18845	6.47306	7.59882	1.23E-08	1.68E-06	9.84167
GZMA	2.41288	9.81776	7.59197	1.25E-08	1.69E-06	9.82345
MXD1	-1.96409	8.40581	-7.58174	1.29E-08	1.71E-06	9.79626
CD8A	1.58079	9.18125	7.58113	1.29E-08	1.71E-06	9.79465
ARHGAP18	0.651164	4.93556	7.57084	1.33E-08	1.75E-06	9.76726
HDAC1	1.03844	9.22804	7.54694	1.42E-08	1.85E-06	9.70362
GBP4	1.35684	9.34008	7.52503	1.50E-08	1.94E-06	9.64522
ATAD2	1.5323	6.065	7.52188	1.52E-08	1.94E-06	9.63681
DCPS	1.02327	7.11743	7.51811	1.53E-08	1.95E-06	9.62676
DDIT4	-1.1367	8.51486	-7.51336	1.55E-08	1.96E-06	9.61409
SLAMF8	1.00404	5.0481	7.50157	1.60E-08	2.00E-06	9.58263
FH	0.889936	6.84503	7.49511	1.63E-08	2.01E-06	9.5654
PPP1R15A	-1.8781	9.95181	-7.49308	1.64E-08	2.01E-06	9.55997
NNT	1.03064	6.94862	7.48192	1.69E-08	2.06E-06	9.53016
CBX5	1.32352	6.78306	7.47707	1.72E-08	2.06E-06	9.51719
NLRP3	-2.16076	7.7736	-7.47535	1.72E-08	2.06E-06	9.5126
SOX4	-0.867304	6.36395	-7.45589	1.82E-08	2.16E-06	9.46056
NUAK2	-1.12276	6.65854	-7.44118	1.89E-08	2.23E-06	9.42121
JUN	-1.54249	9.58463	-7.43626	1.92E-08	2.23E-06	9.40802
SH2D1A	1.28484	7.76791	7.43526	1.93E-08	2.23E-06	9.40536
PLK1	1.42375	6.00968	7.43106	1.95E-08	2.24E-06	9.39411
CDK2	1.2291	6.39876	7.42426	1.99E-08	2.26E-06	9.37589
CKAP5	1.40559	6.83256	7.4182	2.02E-08	2.28E-06	9.35968
BUB1	1.8197	5.43204	7.41544	2.03E-08	2.28E-06	9.35228
TBC1D9	-1.14788	6.41987	-7.3973	2.14E-08	2.38E-06	9.30363
STIL	1.66004	5.57345	7.38274	2.23E-08	2.44E-06	9.26457
TSPAN17	0.776017	7.32271	7.38065	2.24E-08	2.44E-06	9.25898
ATP1B3	0.652308	7.8141	7.37765	2.26E-08	2.44E-06	9.25093
VRK1	1.03436	6.78062	7.37759	2.26E-08	2.44E-06	9.25076
NDUFB10	0.7264	7.9081	7.36872	2.31E-08	2.48E-06	9.22695
RNF167	0.870411	8.18543	7.35254	2.42E-08	2.57E-06	9.1835
MICB	0.715384	7.72595	7.34806	2.45E-08	2.59E-06	9.17144
PGM2	0.853343	6.30579	7.32419	2.62E-08	2.74E-06	9.10729
VPS33A	0.938726	6.37161	7.32005	2.65E-08	2.75E-06	9.09615
TSC22D2	-0.932434	7.71203	-7.31608	2.68E-08	2.76E-06	9.08546
BAZ2B	-0.931362	5.90736	-7.31029	2.72E-08	2.76E-06	9.06987
VCP	0.834753	8.57691	7.30996	2.72E-08	2.76E-06	9.06897
STAT1	1.07382	10.1332	7.30847	2.73E-08	2.76E-06	9.06497
CASP4	0.544991	7.50519	7.30563	2.76E-08	2.77E-06	9.05732
GRAP2	1.02965	6.85737	7.29552	2.83E-08	2.82E-06	9.0301
COX5A	0.997827	8.80358	7.28962	2.88E-08	2.85E-06	9.01422
MRPS9	1.02137	6.67745	7.26186	3.11E-08	3.06E-06	8.93937
ZNF331	-0.674021	6.13787	-7.25574	3.17E-08	3.09E-06	8.92288
TFDP1	1.0952	8.34493	7.24843	3.23E-08	3.13E-06	8.90315
RCC2	0.859587	9.15456	7.2436	3.27E-08	3.13E-06	8.8901
APOBEC3F	0.958335	7.20194	7.24351	3.28E-08	3.13E-06	8.88987
ZFP36	-1.18347	12.0606	-7.24192	3.29E-08	3.13E-06	8.88557
COPB2	1.02498	7.36504	7.22694	3.43E-08	3.24E-06	8.84513
PSMD14	0.850217	7.03514	7.22167	3.48E-08	3.26E-06	8.83089
MRPL10	0.956663	5.90292	7.19913	3.71E-08	3.44E-06	8.76997
RACGAP1	1.42969	5.70806	7.19825	3.71E-08	3.44E-06	8.76758
PDE4B	-1.15219	6.47976	-7.19375	3.76E-08	3.46E-06	8.75543
POP4	0.781936	6.34951	7.18269	3.88E-08	3.55E-06	8.72549
DHFR	0.959202	5.30871	7.17899	3.92E-08	3.56E-06	8.71548
TNFRSF10B	-0.863813	6.35749	-7.17197	4.00E-08	3.61E-06	8.69648
SMC2	1.33917	5.27327	7.16675	4.06E-08	3.64E-06	8.68235
NR4A3	-2.06139	6.04878	-7.14427	4.32E-08	3.85E-06	8.62147
BIRC3	-1.13466	7.82282	-7.13927	4.38E-08	3.88E-06	8.60791
RFC5	1.20081	5.98094	7.13006	4.49E-08	3.96E-06	8.58294
ADAM28	-0.806201	4.72139	-7.12664	4.54E-08	3.97E-06	8.57366
CCNB1	1.19921	4.96958	7.1164	4.67E-08	4.06E-06	8.54589
GRASP	-1.49358	6.1238	-7.11298	4.71E-08	4.07E-06	8.5366
ETNK1	0.748848	5.60304	7.09883	4.90E-08	4.21E-06	8.49821
DNMT1	1.08311	9.27513	7.08833	5.05E-08	4.30E-06	8.4697
IER2	-0.749577	6.91719	-7.08484	5.10E-08	4.30E-06	8.46021
RYBP	-1.18881	7.81814	-7.08467	5.10E-08	4.30E-06	8.45976
CD8B	1.65208	6.46081	7.07985	5.17E-08	4.33E-06	8.44666
LYAR	0.932259	7.81408	7.07813	5.19E-08	4.33E-06	8.442
CD55	-1.07641	8.435	-7.07033	5.31E-08	4.40E-06	8.42078
SAMD3	1.38141	6.70434	7.06772	5.35E-08	4.41E-06	8.41369
GOT2	1.20393	7.48013	7.05949	5.47E-08	4.49E-06	8.39132
RGS2	-1.42838	10.6053	-7.05163	5.59E-08	4.56E-06	8.36994
DEK	0.919813	8.66833	7.04772	5.66E-08	4.58E-06	8.3593
TIMELESS	1.33201	6.10061	7.04358	5.72E-08	4.58E-06	8.34804
PNPO	0.735049	6.8068	7.04255	5.74E-08	4.58E-06	8.34525
CHI3L2	1.34317	5.87939	7.04117	5.76E-08	4.58E-06	8.3415
HCFC1	0.75526	9.12699	7.03998	5.78E-08	4.58E-06	8.33825
NUF2	0.90253	4.43162	7.03002	5.94E-08	4.69E-06	8.31113
RARA	-1.21668	7.53813	-7.0188	6.13E-08	4.77E-06	8.28061
NDUFA9	0.81477	7.90999	7.01875	6.13E-08	4.77E-06	8.28045
SLC11A1	-1.17706	7.61099	-7.01753	6.15E-08	4.77E-06	8.27712
TNFRSF13C	-0.649013	6.30156	-6.99485	6.56E-08	5.06E-06	8.21533
GZMK	1.85139	8.46217	6.95756	7.28E-08	5.59E-06	8.11363
AGPS	0.925215	6.68699	6.95175	7.40E-08	5.60E-06	8.09776
AHSA1	1.04756	7.36196	6.95146	7.41E-08	5.60E-06	8.09697
UGCG	-0.885113	6.89668	-6.95114	7.41E-08	5.60E-06	8.09611
CD300LB	-1.05536	5.61251	-6.94701	7.50E-08	5.64E-06	8.08484
PSMD8	0.842769	7.90924	6.93757	7.70E-08	5.76E-06	8.05904
SSRP1	1.01302	7.07668	6.92592	7.96E-08	5.92E-06	8.02723
NUDT5	1.00499	7.02874	6.92161	8.06E-08	5.96E-06	8.01545
MCM7	1.45273	7.83856	6.91919	8.11E-08	5.97E-06	8.00883
SLC15A3	-1.35158	8.50173	-6.91523	8.20E-08	6.01E-06	7.99801
GALM	1.23021	6.84659	6.91314	8.25E-08	6.01E-06	7.99229
HIST1H3C	1.02333	4.42285	6.90757	8.38E-08	6.07E-06	7.97707
SDHA	0.638687	7.69993	6.90612	8.42E-08	6.07E-06	7.9731
USP1	0.979366	6.8217	6.89955	8.57E-08	6.15E-06	7.95512
RFC3	1.05341	5.22418	6.8925	8.74E-08	6.24E-06	7.93585
PSMA3	1.07972	7.3393	6.87408	9.21E-08	6.51E-06	7.88544
PRF1	1.83126	10.0842	6.87392	9.21E-08	6.51E-06	7.885
DUSP1	-1.17505	11.1661	-6.85777	9.64E-08	6.78E-06	7.84076
KIF18A	1.0205	4.26681	6.84897	9.89E-08	6.92E-06	7.81666
CXCL1	-1.29591	5.33898	-6.83374	1.03E-07	7.17E-06	7.77492
CHAF1B	1.34086	5.6699	6.83112	1.04E-07	7.17E-06	7.76774
SVIL	-0.932911	5.85594	-6.83111	1.04E-07	7.17E-06	7.76769
PRDX3	1.34969	8.29838	6.82805	1.05E-07	7.17E-06	7.7593
KIF2C	1.504	5.20649	6.82773	1.05E-07	7.17E-06	7.75842
TARS	0.882105	6.86607	6.81727	1.08E-07	7.35E-06	7.72973
TNF	-1.98189	7.26145	-6.81408	1.09E-07	7.38E-06	7.72098
RECQL	0.939043	6.92258	6.81111	1.10E-07	7.41E-06	7.71284
MMP9	-0.990963	5.77381	-6.8083	1.11E-07	7.43E-06	7.70513
ZWINT	0.829669	4.76384	6.79762	1.14E-07	7.60E-06	7.67581
CCL3L3	-3.1517	9.432	-6.79644	1.15E-07	7.60E-06	7.67259
HELLS	1.25353	4.7411	6.79555	1.15E-07	7.60E-06	7.67013
BASP1	-1.25429	8.55858	-6.79083	1.16E-07	7.65E-06	7.65718
CDK4	1.29408	7.11938	6.79002	1.17E-07	7.65E-06	7.65495
CHAF1A	0.750046	5.78063	6.77326	1.22E-07	7.97E-06	7.60892
FLNA	0.894986	7.71216	6.77246	1.23E-07	7.97E-06	7.60672
GADD45B	-1.90583	8.91159	-6.76834	1.24E-07	8.02E-06	7.59541
ETS2	-1.70056	7.66505	-6.76131	1.27E-07	8.15E-06	7.57609
MT1E	2.16362	8.05332	6.75935	1.27E-07	8.16E-06	7.57071
TAGAP	-1.35841	8.4838	-6.75654	1.28E-07	8.19E-06	7.56297
BTG1	-0.943783	10.7886	-6.75373	1.29E-07	8.21E-06	7.55525
MRPS11	0.731222	7.11387	6.74343	1.33E-07	8.38E-06	7.52692
TOM1	-0.872773	7.9741	-6.74341	1.33E-07	8.38E-06	7.52686
PAICS	1.24687	7.48637	6.73442	1.37E-07	8.56E-06	7.50214
FCRL6	1.80866	6.99151	6.72997	1.38E-07	8.63E-06	7.48991
ACSL5	0.960088	7.058	6.72606	1.40E-07	8.69E-06	7.47914
CEP55	1.85442	5.24263	6.72307	1.41E-07	8.72E-06	7.47092
EMR3	-1.50807	5.41843	-6.72069	1.42E-07	8.72E-06	7.46436
KIF15	1.51385	4.86856	6.72048	1.42E-07	8.72E-06	7.46381
CASC5	0.905106	4.383	6.71872	1.43E-07	8.72E-06	7.45895
RUVBL1	1.01731	6.02429	6.71617	1.44E-07	8.74E-06	7.45192
AARS	0.973858	7.6133	6.71509	1.44E-07	8.74E-06	7.44895
IL6	-2.35074	5.98102	-6.70822	1.47E-07	8.87E-06	7.43005
TSPAN13	-0.988632	5.49215	-6.69602	1.52E-07	9.14E-06	7.39646
HIST1H2AM	0.977871	4.34539	6.69464	1.53E-07	9.14E-06	7.39265
OLR1	-2.04813	5.00809	-6.68959	1.55E-07	9.24E-06	7.37874
SIRPG	1.20041	7.20195	6.68126	1.59E-07	9.42E-06	7.35579
JAK2	0.958394	6.8695	6.67298	1.63E-07	9.60E-06	7.33296
ACVR2A	-0.740828	5.01685	-6.66741	1.65E-07	9.71E-06	7.31762
VNN3	-1.24512	4.89847	-6.66529	1.66E-07	9.73E-06	7.31178
YWHAQ	0.836205	10.105	6.66111	1.68E-07	9.81E-06	7.30026
CUL4A	0.542838	7.04733	6.65752	1.70E-07	9.87E-06	7.29036
ABCA1	-1.52829	6.56648	-6.63929	1.79E-07	1.04E-05	7.24006
KPNB1	0.674882	9.74679	6.63624	1.80E-07	1.04E-05	7.23165
UHRF1	0.782823	5.3133	6.63185	1.83E-07	1.05E-05	7.21952
COG4	0.8916	5.70443	6.62006	1.89E-07	1.08E-05	7.18697
CD44	-0.949389	9.30307	-6.60994	1.94E-07	1.11E-05	7.15904
PPM1G	0.804283	8.2312	6.60889	1.95E-07	1.11E-05	7.15614
CDCA2	1.32552	4.80331	6.60595	1.97E-07	1.11E-05	7.14802
TAP1	0.844939	9.81048	6.60037	2.00E-07	1.12E-05	7.1326
CDA	-1.28253	7.13835	-6.58844	2.07E-07	1.16E-05	7.09965
ICT1	0.989793	7.11297	6.58374	2.09E-07	1.17E-05	7.08665
SLAMF7	0.959285	7.1173	6.57981	2.12E-07	1.18E-05	7.07579
CENPE	1.33346	4.62249	6.57672	2.14E-07	1.18E-05	7.06725
MRPL16	0.671306	6.55876	6.57559	2.14E-07	1.18E-05	7.06411
ME2	1.0355	7.854	6.57401	2.15E-07	1.18E-05	7.05976
HPRT1	0.899731	7.38681	6.57342	2.16E-07	1.18E-05	7.05813
APOBEC3C	1.16745	7.68106	6.57301	2.16E-07	1.18E-05	7.05698
SQRDL	0.799663	7.42438	6.57019	2.18E-07	1.18E-05	7.04919
KNTC1	1.15508	5.87175	6.56768	2.19E-07	1.18E-05	7.04226
PSMB8	0.913081	8.28038	6.56724	2.20E-07	1.18E-05	7.04104
LEO1	1.03237	5.45138	6.56499	2.21E-07	1.19E-05	7.03481
CCNB2	2.11657	5.75362	6.55751	2.26E-07	1.21E-05	7.01413
NASP	1.08592	6.38385	6.55174	2.29E-07	1.22E-05	6.99816
CD22	-0.9331	6.62965	-6.54889	2.31E-07	1.23E-05	6.99029
GZMB	1.35622	10.3853	6.5384	2.38E-07	1.26E-05	6.96125
PPP1CA	1.18461	8.3955	6.53745	2.39E-07	1.26E-05	6.95861
HSPA8	0.747142	11.1378	6.53538	2.40E-07	1.26E-05	6.95291
H2AFZ	0.994544	8.79531	6.53502	2.41E-07	1.26E-05	6.95189
HIST1H4J	0.743501	5.60999	6.52702	2.46E-07	1.28E-05	6.92976
LSM4	0.865262	7.82673	6.5202	2.51E-07	1.31E-05	6.91088
REPS2	-0.914916	4.99661	-6.51733	2.53E-07	1.31E-05	6.90292
ACLY	0.942704	8.30357	6.51519	2.55E-07	1.31E-05	6.897
PCBD1	0.666834	5.71034	6.50643	2.61E-07	1.34E-05	6.87274
LIMA1	1.0623	5.63088	6.50042	2.66E-07	1.36E-05	6.85609
VPS26B	0.802369	7.20981	6.49362	2.71E-07	1.38E-05	6.83723
AHR	-1.02706	6.98326	-6.48082	2.81E-07	1.43E-05	6.80177
LPXN	0.925566	8.84339	6.47665	2.84E-07	1.44E-05	6.79019
PARN	0.612527	7.29862	6.46938	2.90E-07	1.47E-05	6.77003
PSMB2	0.884758	7.84356	6.4605	2.98E-07	1.49E-05	6.74542
CSF2RA	-0.765407	7.22347	-6.46019	2.98E-07	1.49E-05	6.74455
BLMH	0.732255	7.14071	6.45604	3.01E-07	1.51E-05	6.73304
ACTN1	-1.03092	8.20879	-6.45409	3.03E-07	1.51E-05	6.72763
FBXO5	0.951371	4.67844	6.45381	3.03E-07	1.51E-05	6.72686
MARCKS	-1.7969	9.11531	-6.45066	3.06E-07	1.51E-05	6.71812
LRRCC1	0.744315	4.68712	6.44693	3.09E-07	1.53E-05	6.70777
PSMD1	0.838267	7.06125	6.44413	3.12E-07	1.53E-05	6.69999
DENND2D	1.28685	8.44329	6.44044	3.15E-07	1.54E-05	6.68975
SOCS1	-0.839066	5.68338	-6.43675	3.18E-07	1.55E-05	6.67952
PDE6D	0.516184	5.96096	6.4362	3.19E-07	1.55E-05	6.678
NR4A2	-1.83726	8.34215	-6.43551	3.20E-07	1.55E-05	6.67607
SLC9A3R1	1.00931	9.75133	6.43199	3.23E-07	1.56E-05	6.66631
WDHD1	0.804101	4.38675	6.42971	3.25E-07	1.56E-05	6.65999
CCT7	0.977853	8.02549	6.42859	3.26E-07	1.56E-05	6.65687
IRAK2	-2.06735	7.03815	-6.42687	3.28E-07	1.57E-05	6.6521
ILK	0.906594	8.34821	6.41744	3.36E-07	1.60E-05	6.62592
SLBP	0.862267	7.85593	6.4152	3.39E-07	1.61E-05	6.6197
TMEM106C	1.08063	6.81758	6.40827	3.45E-07	1.63E-05	6.60046
RFWD3	0.932213	6.81327	6.40801	3.46E-07	1.63E-05	6.59973
ATP5A1	0.795238	9.87125	6.40092	3.53E-07	1.65E-05	6.58002
RPE	0.620751	5.44056	6.40079	3.53E-07	1.65E-05	6.57968
PPP1R7	0.961998	7.24784	6.40059	3.53E-07	1.65E-05	6.57911
RASSF2	-0.88298	8.91025	-6.37788	3.77E-07	1.76E-05	6.516
CD3G	1.29014	9.14534	6.3752	3.80E-07	1.76E-05	6.50854
CMAS	0.664338	6.60904	6.37372	3.81E-07	1.76E-05	6.50443
KIF4A	1.14888	4.66583	6.37137	3.84E-07	1.77E-05	6.4979
EIF2B2	1.13946	7.52096	6.36861	3.87E-07	1.78E-05	6.49023
SASS6	0.744912	4.79193	6.36025	3.96E-07	1.80E-05	6.46699
NKG7	1.54415	11.3925	6.35993	3.97E-07	1.80E-05	6.46608
MAD2L1	0.818628	4.60679	6.35992	3.97E-07	1.80E-05	6.46605
B3GNT5	-1.0968	5.14078	-6.35982	3.97E-07	1.80E-05	6.46579
SAE1	0.992247	8.95377	6.34557	4.13E-07	1.87E-05	6.42613
GAPDH	0.779067	11.1621	6.34038	4.19E-07	1.89E-05	6.41171
PSMB9	1.1611	7.65911	6.33739	4.23E-07	1.90E-05	6.40339
ESCO2	0.864068	4.4323	6.33498	4.26E-07	1.91E-05	6.39668
PRDX1	0.841063	8.89988	6.32891	4.33E-07	1.94E-05	6.37978
IVNS1ABP	-1.26738	7.78792	-6.32288	4.41E-07	1.97E-05	6.36301
GAB2	-1.33832	6.64705	-6.30592	4.63E-07	2.06E-05	6.31578
RAD51	0.641275	5.11514	6.30493	4.64E-07	2.06E-05	6.31302
CLTA	0.647445	7.05359	6.30168	4.69E-07	2.07E-05	6.30396
EXO1	1.09987	4.56	6.29838	4.73E-07	2.08E-05	6.29479
ETFA	1.10091	8.3586	6.29601	4.76E-07	2.09E-05	6.28819
PLEKHG1	-0.722814	4.73747	-6.29525	4.77E-07	2.09E-05	6.28606
ACAD9	0.562807	6.60367	6.29453	4.78E-07	2.09E-05	6.28406
POLR2G	0.874884	8.48297	6.29271	4.81E-07	2.09E-05	6.27899
ATP5B	0.699373	10.9764	6.28671	4.89E-07	2.12E-05	6.26228
SLC26A11	-0.616366	5.70198	-6.28439	4.92E-07	2.13E-05	6.25581
IMMT	0.782982	7.9685	6.28214	4.96E-07	2.14E-05	6.24954
SMC3	0.74622	6.10953	6.27602	5.04E-07	2.17E-05	6.2325
RBL1	0.843255	5.51553	6.27378	5.08E-07	2.17E-05	6.22624
ZNF10	-0.581759	4.62645	-6.27363	5.08E-07	2.17E-05	6.22582
RGPD1	-0.760104	6.26869	-6.27213	5.10E-07	2.17E-05	6.22164
IFNGR1	-1.00446	8.18003	-6.27136	5.11E-07	2.17E-05	6.21949
KIAA1324	-0.701116	5.15402	-6.26855	5.15E-07	2.18E-05	6.21166
PROSC	0.639472	8.29642	6.26828	5.16E-07	2.18E-05	6.21093
SNN	-1.13585	7.46438	-6.26737	5.17E-07	2.18E-05	6.20839
NUP37	0.956727	6.67646	6.26583	5.19E-07	2.18E-05	6.20408
BAZ1B	0.945863	7.24344	6.26531	5.20E-07	2.18E-05	6.20263
FIBP	0.651793	7.45354	6.25347	5.38E-07	2.24E-05	6.16963
MN1	-0.806169	4.46365	-6.25342	5.38E-07	2.24E-05	6.1695
CCNE2	1.28661	4.61922	6.25206	5.40E-07	2.24E-05	6.16569
SP140	0.752914	7.29352	6.24566	5.50E-07	2.28E-05	6.14784
CCL20	-1.462	4.62111	-6.24244	5.55E-07	2.29E-05	6.13888
TMPO	0.993073	6.58839	6.24197	5.56E-07	2.29E-05	6.13757
KIAA1683	-0.646125	5.62822	-6.2399	5.59E-07	2.29E-05	6.13179
FCER2	-0.969559	6.50239	-6.23892	5.61E-07	2.29E-05	6.12904
FKBP5	0.58982	7.98657	6.23596	5.66E-07	2.31E-05	6.12079
NINJ1	-1.70567	8.97312	-6.23344	5.70E-07	2.31E-05	6.11376
PNRC1	-0.850735	8.36176	-6.23249	5.71E-07	2.31E-05	6.11111
TMEM88	-0.931073	5.40654	-6.2315	5.73E-07	2.31E-05	6.10835
IL1RN	-1.61773	6.12369	-6.23133	5.73E-07	2.31E-05	6.10789
PRKCD	-1.00201	8.34988	-6.22918	5.77E-07	2.32E-05	6.10189
THYN1	0.653903	6.45908	6.22796	5.79E-07	2.32E-05	6.09849
FAM96B	0.599693	8.41066	6.22588	5.82E-07	2.33E-05	6.09268
ADA	1.1259	7.92208	6.21731	5.97E-07	2.38E-05	6.06877
CD2BP2	0.749198	7.82635	6.21338	6.04E-07	2.40E-05	6.0578
CCL5	1.09002	11.7321	6.21194	6.06E-07	2.40E-05	6.05378
IPO9	0.743364	6.43218	6.20862	6.12E-07	2.41E-05	6.04451
SEC24C	0.844037	7.53016	6.20756	6.14E-07	2.41E-05	6.04155
MRPS7	0.654862	7.64416	6.20738	6.14E-07	2.41E-05	6.04105
FAM111A	0.524516	7.60897	6.20313	6.22E-07	2.44E-05	6.02919
G3BP1	0.812824	6.73076	6.20032	6.27E-07	2.45E-05	6.02135
FCAR	-1.50368	7.5975	-6.19682	6.33E-07	2.47E-05	6.01158
LBR	0.987722	6.96241	6.19439	6.37E-07	2.48E-05	6.00478
DNAJC1	0.592677	5.64298	6.19301	6.40E-07	2.48E-05	6.00095
MRE11A	0.650192	5.10783	6.19257	6.41E-07	2.48E-05	5.9997
E2F2	1.28343	7.19445	6.19123	6.43E-07	2.48E-05	5.99596
TPI1	0.774672	8.93089	6.1831	6.58E-07	2.53E-05	5.97327
ATP5F1	0.66222	9.24309	6.18272	6.59E-07	2.53E-05	5.9722
RAD51AP1	1.45687	5.16436	6.18221	6.60E-07	2.53E-05	5.97079
HIST1H2BH	1.29607	5.68129	6.1759	6.72E-07	2.57E-05	5.95315
PSMA2	0.827049	7.15176	6.16873	6.86E-07	2.60E-05	5.93313
ASCC3	0.622212	5.37015	6.16853	6.87E-07	2.60E-05	5.93257
PRKCQ	0.942039	8.05109	6.16815	6.87E-07	2.60E-05	5.93151
ABI3	0.847883	7.21989	6.15803	7.08E-07	2.67E-05	5.90323
HDDC2	0.715588	7.9389	6.15113	7.22E-07	2.72E-05	5.88397
RHOB	-1.17459	7.68242	-6.14884	7.27E-07	2.73E-05	5.87755
LCK	0.953755	7.20825	6.14601	7.33E-07	2.74E-05	5.86964
PHACTR1	-0.516821	4.70983	-6.14175	7.42E-07	2.76E-05	5.85775
WSB2	0.554119	6.67149	6.14085	7.43E-07	2.76E-05	5.85523
ATXN1	0.720859	6.98206	6.14055	7.44E-07	2.76E-05	5.85439
TIMP1	-1.08563	8.32525	-6.14011	7.45E-07	2.76E-05	5.85315
ZDHHC16	0.650807	6.22429	6.13976	7.46E-07	2.76E-05	5.85218
DIRC2	-0.956038	6.9889	-6.13835	7.49E-07	2.76E-05	5.84823
SUCLG1	0.676956	7.22352	6.13621	7.53E-07	2.77E-05	5.84226
CSE1L	0.976902	7.34877	6.13494	7.56E-07	2.78E-05	5.83872
GNGT2	0.681094	5.53918	6.13257	7.61E-07	2.79E-05	5.83208
TGFBR3	1.35906	8.54201	6.12941	7.68E-07	2.81E-05	5.82325
PLAU	-2.36524	5.93886	-6.12536	7.77E-07	2.83E-05	5.81193
CASP2	0.733905	7.79108	6.12253	7.84E-07	2.85E-05	5.80402
E2F7	1.08067	4.6862	6.11865	7.92E-07	2.87E-05	5.79316
SAMM50	0.801038	7.66866	6.1131	8.05E-07	2.91E-05	5.77765
EREG	-1.23563	5.4937	-6.11148	8.09E-07	2.91E-05	5.77313
TNFSF8	-1.59758	6.62948	-6.11129	8.09E-07	2.91E-05	5.77259
PSMB3	0.904226	10.1079	6.10196	8.31E-07	2.98E-05	5.74648
MID1IP1	-0.705724	6.82533	-6.09846	8.40E-07	3.01E-05	5.73669
MT1G	1.83863	6.20612	6.09758	8.42E-07	3.01E-05	5.73423
FYTTD1	-0.480537	6.35017	-6.09673	8.44E-07	3.01E-05	5.73187
RFC4	1.15837	6.27028	6.09509	8.48E-07	3.01E-05	5.72726
PAXIP1	0.681546	6.41722	6.09502	8.48E-07	3.01E-05	5.72708
SF3B3	0.918954	7.83923	6.08582	8.71E-07	3.08E-05	5.70133
KIF14	1.33983	4.79539	6.07891	8.89E-07	3.13E-05	5.68201
ITGAL	0.883611	9.42416	6.07268	9.05E-07	3.18E-05	5.66456
ANKRD22	1.70684	5.50678	6.0724	9.05E-07	3.18E-05	5.66379
HIST1H1C	0.768184	7.19992	6.06204	9.33E-07	3.26E-05	5.63478
SORL1	-1.02817	8.48956	-6.05955	9.39E-07	3.28E-05	5.62783
PARP1	0.883423	8.13364	6.05702	9.46E-07	3.29E-05	5.62073
PRKDC	0.928379	6.79596	6.05659	9.47E-07	3.29E-05	5.61954
MLF1IP	1.0042	4.85293	6.04966	9.67E-07	3.35E-05	5.60013
PTGER4	-0.895424	9.10277	-6.0468	9.75E-07	3.37E-05	5.59211
NR4A1	-1.26198	5.86645	-6.04305	9.85E-07	3.40E-05	5.58163
PLK2	-0.568143	4.13938	-6.03788	1.00E-06	3.44E-05	5.56715
SNAPC1	-0.623189	5.15584	-6.03568	1.01E-06	3.45E-05	5.56098
CLSPN	1.06696	4.63415	6.03292	1.01E-06	3.47E-05	5.55324
HDAC8	0.453164	4.61043	6.02934	1.02E-06	3.50E-05	5.54322
DHRS3	-0.838585	6.24521	-6.02196	1.05E-06	3.55E-05	5.52257
FEN1	1.47155	7.48036	6.02181	1.05E-06	3.55E-05	5.52213
GIMAP4	1.09842	9.45096	6.02131	1.05E-06	3.55E-05	5.52072
PPIB	0.694362	8.11532	6.02116	1.05E-06	3.55E-05	5.52033
INPP5A	-0.844729	5.72178	-6.01058	1.08E-06	3.65E-05	5.49068
NBPF9	-0.528509	6.54124	-6.00555	1.10E-06	3.70E-05	5.47659
ZNF165	-0.6208	4.58286	-6.00363	1.10E-06	3.70E-05	5.4712
CPT1A	0.96765	6.1285	6.00329	1.10E-06	3.70E-05	5.47026
STIP1	1.02937	7.59136	6.00202	1.11E-06	3.70E-05	5.46669
AQP9	-2.45004	8.43101	-6.00144	1.11E-06	3.70E-05	5.46507
CKS2	1.42165	7.01625	5.99963	1.12E-06	3.70E-05	5.46001
CRYZ	0.716609	6.30525	5.99945	1.12E-06	3.70E-05	5.45949
KIAA0196	0.943415	7.74044	5.99936	1.12E-06	3.70E-05	5.45922
IL1A	-1.99571	4.73362	-5.99685	1.13E-06	3.72E-05	5.4522
MTSS1	-0.61259	7.68049	-5.99115	1.14E-06	3.77E-05	5.43623
ECH1	0.956686	9.49932	5.98436	1.17E-06	3.84E-05	5.41721
IER5	-1.20132	7.5736	-5.98165	1.18E-06	3.85E-05	5.40959
DDB2	0.493901	5.89841	5.98158	1.18E-06	3.85E-05	5.4094
E2F8	0.746798	4.56403	5.98014	1.18E-06	3.86E-05	5.40537
JUND	-1.02773	10.6064	-5.97963	1.18E-06	3.86E-05	5.40394
EIF2S2	0.833237	6.57169	5.97727	1.19E-06	3.88E-05	5.39733
TMEM154	-0.917049	7.89433	-5.97555	1.20E-06	3.89E-05	5.39251
IFRD1	-0.978439	6.42927	-5.96624	1.23E-06	3.98E-05	5.3664
GSK3B	0.483759	7.59077	5.96599	1.23E-06	3.98E-05	5.36571
CLDND1	0.647426	8.58391	5.9587	1.26E-06	4.05E-05	5.34527
CCL4L1	-2.27461	7.28222	-5.95815	1.26E-06	4.05E-05	5.34371
INCENP	0.861271	6.0361	5.95167	1.28E-06	4.12E-05	5.32554
RBBP4	0.720488	6.75721	5.94911	1.29E-06	4.14E-05	5.31838
BRCA1	0.782945	4.57013	5.94348	1.31E-06	4.20E-05	5.30258
PREP	1.00287	6.92452	5.9408	1.32E-06	4.22E-05	5.29507
ZNHIT1	0.560885	7.91434	5.93761	1.34E-06	4.24E-05	5.28611
KIAA0247	-0.875839	7.86244	-5.93714	1.34E-06	4.24E-05	5.2848
LZIC	0.588504	5.99688	5.93607	1.34E-06	4.25E-05	5.28179
TSPAN33	-1.13048	6.57712	-5.9341	1.35E-06	4.26E-05	5.27626
CHKA	-0.758578	5.39462	-5.92713	1.38E-06	4.34E-05	5.25671
TNFSF14	-0.848188	6.75595	-5.91667	1.42E-06	4.46E-05	5.22737
CPSF2	0.854581	6.6032	5.91452	1.43E-06	4.48E-05	5.22134
CD3D	1.04956	9.73713	5.91392	1.43E-06	4.48E-05	5.21967
RNF20	0.611324	7.42531	5.91329	1.43E-06	4.48E-05	5.21788
NCBP1	0.804964	6.76941	5.90905	1.45E-06	4.52E-05	5.20599
DENND3	-0.899132	6.1147	-5.90663	1.46E-06	4.55E-05	5.1992
ATP2B1	-1.07223	6.85153	-5.90308	1.48E-06	4.58E-05	5.18922
TP53	0.736369	6.44235	5.90003	1.49E-06	4.61E-05	5.18067
PTPRE	-0.878372	7.71748	-5.8953	1.51E-06	4.67E-05	5.16739
MS4A1	-0.992455	6.69651	-5.89361	1.52E-06	4.67E-05	5.16265
NCAPG2	1.20707	5.38515	5.89351	1.52E-06	4.67E-05	5.16239
TAP2	0.68159	7.90541	5.89126	1.53E-06	4.69E-05	5.15607
GRAMD1A	-0.618757	7.70134	-5.89048	1.53E-06	4.69E-05	5.15388
EPRS	0.810112	8.09848	5.89017	1.53E-06	4.69E-05	5.15299
IRF8	-1.09055	9.08085	-5.88505	1.55E-06	4.75E-05	5.13862
PSMD13	0.780263	6.77502	5.87882	1.58E-06	4.82E-05	5.12115
P2RX1	-0.908538	6.54463	-5.87582	1.60E-06	4.85E-05	5.11272
IFI27	2.19924	6.26015	5.87294	1.61E-06	4.87E-05	5.10462
COX8A	1.11644	10.5715	5.87292	1.61E-06	4.87E-05	5.10459
HDAC2	0.511911	6.76756	5.87109	1.62E-06	4.89E-05	5.09943
PRNP	-0.92278	8.915	-5.86877	1.63E-06	4.91E-05	5.09294
PPP2R5C	0.775304	7.76678	5.86485	1.65E-06	4.96E-05	5.08192
IL1R2	-0.8385	4.54291	-5.85676	1.69E-06	5.06E-05	5.05919
CX3CR1	1.5271	9.50706	5.8529	1.71E-06	5.11E-05	5.04837
KLF6	-0.901831	10.3024	-5.84403	1.75E-06	5.23E-05	5.02345
CDK5	0.732038	6.23942	5.83971	1.77E-06	5.29E-05	5.01133
RBBP7	0.866593	7.53526	5.83653	1.79E-06	5.32E-05	5.00238
FBXW2	0.561892	6.87573	5.83407	1.80E-06	5.34E-05	4.99549
PLK4	1.45362	5.26635	5.8332	1.81E-06	5.34E-05	4.99304
TLR4	-1.24397	6.72799	-5.8331	1.81E-06	5.34E-05	4.99275
KARS	0.740132	8.08867	5.83083	1.82E-06	5.37E-05	4.98637
ACAT1	0.917137	6.52133	5.83005	1.82E-06	5.37E-05	4.98419
TIPRL	0.689657	7.06655	5.82784	1.83E-06	5.39E-05	4.97799
GPI	0.666428	8.15965	5.82395	1.85E-06	5.44E-05	4.96707
PFKP	0.762556	7.48321	5.82348	1.86E-06	5.44E-05	4.96574
IFNGR2	-1.1965	9.06864	-5.82064	1.87E-06	5.47E-05	4.95777
TAF5	0.697453	5.62048	5.81751	1.89E-06	5.50E-05	4.94897
ADIPOR2	0.779063	7.12672	5.81694	1.89E-06	5.50E-05	4.94736
FTSJ3	0.562824	5.60278	5.81683	1.89E-06	5.50E-05	4.94705
RAB3GAP1	-0.829929	6.41711	-5.81245	1.92E-06	5.56E-05	4.93474
RFC2	0.610277	5.62948	5.80404	1.96E-06	5.67E-05	4.91112
TXNDC9	0.551102	5.60819	5.80386	1.97E-06	5.67E-05	4.91062
GNA15	-1.01903	6.92619	-5.79812	2.00E-06	5.75E-05	4.89448
SNX4	0.568148	6.74764	5.79754	2.00E-06	5.75E-05	4.89285
NSMCE1	0.637583	7.48707	5.79682	2.01E-06	5.75E-05	4.89083
FOSL2	-1.01905	7.07203	-5.79628	2.01E-06	5.75E-05	4.88932
LOC606724	0.618647	7.75995	5.79401	2.02E-06	5.77E-05	4.88295
PSMB6	0.75149	9.25427	5.79386	2.02E-06	5.77E-05	4.88252
POLE	0.808148	5.97277	5.79319	2.03E-06	5.77E-05	4.88062
CCL3	-2.90097	8.59984	-5.7891	2.05E-06	5.83E-05	4.86914
NDUFS1	0.636615	5.64444	5.78715	2.06E-06	5.85E-05	4.86367
BPNT1	0.548865	5.16201	5.78317	2.09E-06	5.91E-05	4.85246
SOCS3	-1.18181	6.49472	-5.78122	2.10E-06	5.93E-05	4.84699
PTPLAD1	1.27733	6.74349	5.77353	2.15E-06	6.05E-05	4.82537
IER3IP1	0.47297	6.85696	5.76738	2.18E-06	6.15E-05	4.80809
GBP1	1.4978	9.52469	5.76349	2.21E-06	6.20E-05	4.79715
PSMC5	0.560609	8.12833	5.76074	2.23E-06	6.24E-05	4.78943
KHSRP	0.635143	7.85013	5.76007	2.23E-06	6.24E-05	4.78756
MT1A	1.08543	7.56506	5.75624	2.26E-06	6.30E-05	4.77678
MAP4K1	0.991119	8.40281	5.75486	2.26E-06	6.31E-05	4.77291
C11orf48	0.696562	7.21535	5.75295	2.28E-06	6.32E-05	4.76753
HIST1H2BF	1.21001	6.11174	5.75211	2.28E-06	6.32E-05	4.76517
VDAC3	0.760163	9.18055	5.75203	2.28E-06	6.32E-05	4.76495
BRD7	0.635358	7.97115	5.74002	2.36E-06	6.52E-05	4.73118
SUPT16H	0.970815	8.53979	5.73964	2.37E-06	6.52E-05	4.73011
STOML2	0.967897	8.20366	5.73952	2.37E-06	6.52E-05	4.72977
SPRY1	-0.978612	5.19823	-5.73795	2.38E-06	6.54E-05	4.72536
ENO1	0.639018	10.3664	5.73212	2.42E-06	6.64E-05	4.70897
CDCA8	1.2835	5.32019	5.73054	2.43E-06	6.65E-05	4.70452
CDKN3	1.56808	5.15464	5.72999	2.43E-06	6.65E-05	4.70298
VPS25	0.781543	7.1566	5.72737	2.45E-06	6.69E-05	4.69563
JMJD1C	-0.824081	7.91817	-5.72618	2.46E-06	6.69E-05	4.69227
BUB3	0.726263	8.26103	5.72533	2.47E-06	6.69E-05	4.68989
MT2A	1.50074	10.0921	5.72532	2.47E-06	6.69E-05	4.68986
MAP3K2	-0.643595	7.08051	-5.72362	2.48E-06	6.71E-05	4.68508
PRKCH	0.892808	10.0086	5.71863	2.51E-06	6.79E-05	4.67105
MDH1	0.67732	7.83789	5.71839	2.52E-06	6.79E-05	4.67035
CDC23	0.718511	6.55448	5.7174	2.52E-06	6.80E-05	4.66758
COX6A1	0.797836	9.54337	5.71541	2.54E-06	6.82E-05	4.66198
ANXA6	1.10478	7.98746	5.71281	2.56E-06	6.86E-05	4.65468
N4BP1	-0.707445	7.24108	-5.7111	2.57E-06	6.88E-05	4.64986
ALG8	0.648903	6.46437	5.70532	2.61E-06	6.98E-05	4.63362
C1QC	0.890321	5.52011	5.70482	2.62E-06	6.98E-05	4.6322
CAND1	0.62477	6.19307	5.70209	2.64E-06	7.02E-05	4.62451
PTPN22	0.78569	7.2501	5.69876	2.66E-06	7.08E-05	4.61516
ANTXR2	-0.738564	7.0026	-5.69716	2.68E-06	7.10E-05	4.61066
EMR2	-1.14651	7.90462	-5.696	2.69E-06	7.11E-05	4.6074
MTA2	0.992734	7.98908	5.69328	2.71E-06	7.14E-05	4.59975
TLR2	-1.17211	5.7055	-5.69311	2.71E-06	7.14E-05	4.59925
CD82	-0.913874	6.52776	-5.69064	2.73E-06	7.18E-05	4.59232
GPKOW	0.423745	6.21039	5.68647	2.76E-06	7.25E-05	4.5806
SGOL1	0.922418	4.69893	5.67473	2.86E-06	7.49E-05	4.54757
PI3	-1.62675	5.26401	-5.66991	2.90E-06	7.58E-05	4.53402
CDC20	1.87247	6.54265	5.66854	2.91E-06	7.59E-05	4.53014
TTC1	0.604809	5.99498	5.66851	2.91E-06	7.59E-05	4.53008
AIFM1	0.669434	6.6482	5.66617	2.93E-06	7.62E-05	4.5235
PPP2R5D	0.74576	5.85583	5.66419	2.94E-06	7.65E-05	4.51792
HAT1	0.673689	6.61767	5.6639	2.95E-06	7.65E-05	4.51709
CLIC4	-1.3825	6.53325	-5.66148	2.97E-06	7.69E-05	4.51031
DEPDC1B	1.21203	4.82468	5.65564	3.02E-06	7.80E-05	4.49386
CENPO	0.614951	4.86904	5.65393	3.03E-06	7.83E-05	4.48905
M6PR	1.05709	8.06886	5.65231	3.05E-06	7.85E-05	4.4845
ADORA2A	-0.803504	6.82981	-5.65153	3.05E-06	7.86E-05	4.48231
PILRA	-1.21035	7.91284	-5.64403	3.12E-06	8.01E-05	4.46121
ALDH18A1	0.765191	6.28332	5.64156	3.14E-06	8.03E-05	4.45424
GOT1	0.782825	6.23279	5.64091	3.15E-06	8.03E-05	4.45241
HIST1H3J	1.21797	6.13884	5.64064	3.15E-06	8.03E-05	4.45167
IARS2	0.763749	7.29913	5.64046	3.15E-06	8.03E-05	4.45114
CDK2AP2	0.786681	6.87638	5.64012	3.16E-06	8.03E-05	4.45019
CCNE1	0.883575	5.61899	5.6356	3.20E-06	8.12E-05	4.43747
ALOX5AP	-0.880024	9.76805	-5.63483	3.21E-06	8.13E-05	4.43531
GNG7	-0.719876	5.98389	-5.63068	3.24E-06	8.21E-05	4.42363
XPNPEP1	0.580013	7.61063	5.62979	3.25E-06	8.22E-05	4.42113
TTK	1.42139	4.82584	5.62876	3.26E-06	8.22E-05	4.41824
SPIB	-0.804485	5.25136	-5.62852	3.27E-06	8.22E-05	4.41757
SLC2A6	-0.745406	7.68521	-5.62773	3.27E-06	8.22E-05	4.41533
DGAT2	-0.973062	5.62948	-5.62091	3.34E-06	8.37E-05	4.39615
CD69	-0.957898	10.8009	-5.62018	3.34E-06	8.38E-05	4.3941
EFTUD1	0.60374	5.48786	5.61408	3.40E-06	8.51E-05	4.37694
ZDHHC13	0.650418	4.94183	5.60863	3.46E-06	8.62E-05	4.36158
MAT2B	0.516417	7.28945	5.60845	3.46E-06	8.62E-05	4.36109
CCT6A	0.6839	6.81273	5.60704	3.47E-06	8.64E-05	4.35712
CORO1A	1.11968	9.73429	5.59031	3.65E-06	9.06E-05	4.31003
PTAFR	-0.917386	6.3516	-5.57764	3.78E-06	9.37E-05	4.27439
CST7	1.24656	10.2308	5.57748	3.79E-06	9.37E-05	4.27393
NUP205	0.802015	7.05195	5.57649	3.80E-06	9.38E-05	4.27114
BCL2A1	-1.12237	7.23598	-5.57362	3.83E-06	9.44E-05	4.26307
KLRG1	0.880346	4.98752	5.56863	3.88E-06	9.56E-05	4.24903
UCP2	1.06397	9.22004	5.5679	3.89E-06	9.56E-05	4.24698
ALOX5	-0.924524	8.89329	-5.56653	3.91E-06	9.59E-05	4.24311
MT1H	1.12905	6.11474	5.56434	3.93E-06	9.63E-05	4.23695
IKBKE	0.512256	6.56922	5.56358	3.94E-06	9.64E-05	4.2348
H2AFX	1.09064	6.35295	5.55825	4.00E-06	9.77E-05	4.21979
ZW10	0.6436	6.04199	5.55564	4.03E-06	9.81E-05	4.21244
MCM2	1.53969	6.28785	5.55547	4.04E-06	9.81E-05	4.21197
TSTA3	0.598264	6.51472	5.55257	4.07E-06	9.87E-05	4.20383
IARS	0.94128	6.27305	5.55251	4.07E-06	9.87E-05	4.20365
SSBP2	-0.674889	6.63651	-5.54951	4.11E-06	9.93E-05	4.19521
PNPLA8	-0.705455	6.29726	-5.54909	4.11E-06	9.93E-05	4.19402
INPP4A	0.669868	6.0794	5.54459	4.16E-06	0.000100439	4.18136
PDHA1	0.532524	6.73507	5.54078	4.21E-06	0.000101386	4.17062
CCT8	0.76689	8.62354	5.53969	4.22E-06	0.000101536	4.16756
DCLRE1A	1.01989	5.07145	5.53628	4.27E-06	0.000102374	4.15796
HIST1H2AB	1.32805	5.87791	5.53351	4.30E-06	0.000103026	4.15017
CCR4	-0.707187	4.58348	-5.53219	4.32E-06	0.000103251	4.14644
ZNF134	-0.678107	6.05923	-5.53013	4.34E-06	0.000103694	4.14066
YARS	0.77224	7.84436	5.52881	4.36E-06	0.000103921	4.13693
CLTC	0.562815	6.94105	5.52746	4.38E-06	0.000104156	4.13312
PPP1R12A	0.687439	7.28978	5.52322	4.43E-06	0.000105271	4.12119
KPNA2	0.774532	6.98434	5.51982	4.47E-06	0.000106136	4.11164
MAP3K8	-0.970161	8.01535	-5.51239	4.57E-06	0.00010827	4.09072
USP28	1.00757	5.41993	5.50576	4.66E-06	0.00011019	4.07206
USP39	0.642573	7.40564	5.50464	4.68E-06	0.000110366	4.06891
PA2G4	1.00525	8.61855	5.49931	4.75E-06	0.000111901	4.05391
KEAP1	0.853179	6.3393	5.49721	4.78E-06	0.000112401	4.04799
SRR	0.616236	4.99777	5.4931	4.84E-06	0.000113563	4.03642
SGTB	-0.736535	5.69737	-5.48931	4.89E-06	0.000114632	4.02574
MAML2	-0.617056	5.67999	-5.48708	4.92E-06	0.000115188	4.01946
ZNF250	-0.432291	4.82109	-5.48569	4.94E-06	0.000115465	4.01555
DDB1	0.740046	8.57086	5.48457	4.96E-06	0.000115653	4.01239
CEP152	0.723685	4.98497	5.48396	4.97E-06	0.000115666	4.01068
FAM65A	-0.707032	7.25791	-5.48341	4.97E-06	0.000115666	4.00913
ZCCHC14	-0.666314	5.63675	-5.48213	4.99E-06	0.000115733	4.00553
COQ5	0.906244	6.53619	5.48172	5.00E-06	0.000115733	4.00439
PSMD2	0.758405	7.55546	5.48154	5.00E-06	0.000115733	4.00387
ZBTB10	-1.17302	5.89123	-5.48089	5.01E-06	0.000115764	4.00204
BTG2	-1.32622	9.34127	-5.47972	5.03E-06	0.000115972	3.99874
HSPA4	0.601877	7.1554	5.47518	5.09E-06	0.00011732	3.98597
GSR	0.63657	6.42185	5.47376	5.11E-06	0.000117614	3.98198
AURKB	1.56931	6.25802	5.47222	5.14E-06	0.000117787	3.97763
ITGA5	-0.649042	7.37586	-5.47193	5.14E-06	0.000117787	3.97682
TNFRSF10D	-0.559385	4.798	-5.4716	5.15E-06	0.000117787	3.9759
ISOC1	0.649177	6.75037	5.46613	5.23E-06	0.000119482	3.96049
SLAMF6	1.63061	9.17751	5.45937	5.33E-06	0.000121653	3.94147
COX15	0.475822	5.305	5.45815	5.35E-06	0.000121892	3.93803
GAB3	0.739785	6.55996	5.45608	5.38E-06	0.000122432	3.93221
CCT3	0.861936	7.86369	5.4545	5.41E-06	0.000122801	3.92775
TARP	1.40075	7.45461	5.44951	5.49E-06	0.000124394	3.91371
CCRL2	-1.23977	5.29356	-5.44194	5.61E-06	0.000126955	3.8924
LY86	-1.04331	8.21771	-5.43919	5.65E-06	0.000127773	3.88465
COG7	0.475301	5.36637	5.43748	5.68E-06	0.000128207	3.87983
HIST2H2AB	0.995667	6.09919	5.42283	5.93E-06	0.000133507	3.83861
DDX23	0.859462	7.10178	5.42213	5.94E-06	0.000133507	3.83665
CLEC4E	-1.58995	6.50199	-5.4219	5.95E-06	0.000133507	3.83597
ZC3H12A	-1.20017	7.27363	-5.41533	6.06E-06	0.00013586	3.8175
BIVM	0.750464	5.33366	5.41296	6.10E-06	0.000136588	3.81081
ANPEP	-1.36351	7.59491	-5.39984	6.34E-06	0.000141664	3.7739
KDELC2	0.785526	5.98461	5.3986	6.36E-06	0.000141875	3.7704
THOC5	0.6386	7.14079	5.39826	6.37E-06	0.000141875	3.76944
DCP1A	-0.764342	7.62787	-5.39651	6.40E-06	0.000142377	3.76451
LANCL1	0.643554	6.77168	5.39471	6.43E-06	0.000142901	3.75945
NELL2	-1.10104	7.06596	-5.39306	6.46E-06	0.000143363	3.75481
CDKN1A	-0.831162	7.67817	-5.38992	6.52E-06	0.000144356	3.74598
NFKB2	-0.989768	6.67246	-5.38962	6.53E-06	0.000144356	3.74512
TAF15	0.899391	9.14817	5.38901	6.54E-06	0.000144389	3.74341
UQCRC1	0.624105	7.66544	5.38729	6.57E-06	0.000144888	3.73857
AATF	0.838326	8.34007	5.38127	6.69E-06	0.000147218	3.72161
CTR9	0.653384	5.95715	5.37045	6.90E-06	0.000151678	3.69118
ITGAX	-1.0318	7.88485	-5.3674	6.96E-06	0.000152469	3.68257
ELP4	0.790206	5.81875	5.36722	6.97E-06	0.000152469	3.68209
CD19	-0.828637	6.56916	-5.36708	6.97E-06	0.000152469	3.68169
SNRPA	1.10142	8.18698	5.36212	7.07E-06	0.000154255	3.66771
THAP2	-0.953351	5.30483	-5.36179	7.08E-06	0.000154255	3.66679
COMMD8	0.46754	4.64798	5.3615	7.08E-06	0.000154255	3.66597
DRG1	0.697962	7.89702	5.36061	7.10E-06	0.000154418	3.66347
PARK7	0.691547	8.52243	5.35851	7.15E-06	0.000154789	3.65757
ATIC	0.732692	7.50562	5.35806	7.15E-06	0.000154789	3.65629
NPC1	0.634873	7.3083	5.35802	7.16E-06	0.000154789	3.65619
C1QBP	0.86323	9.11859	5.3577	7.16E-06	0.000154789	3.65529
GNPAT	0.627609	6.75428	5.35393	7.24E-06	0.000156256	3.64468
TRIP4	0.617055	6.63473	5.35246	7.27E-06	0.000156688	3.64055
BCL6	-1.02618	7.93883	-5.34927	7.34E-06	0.000157909	3.63157
GPR56	1.37761	8.75554	5.34342	7.47E-06	0.000160376	3.61508
TGIF1	-0.601134	5.67652	-5.34105	7.52E-06	0.000161238	3.60843
MSH2	0.515538	4.79688	5.33837	7.58E-06	0.000162256	3.60088
ATP2B4	1.00676	7.5109	5.33632	7.62E-06	0.000162982	3.5951
PPA1	0.674133	8.77224	5.33545	7.64E-06	0.000163149	3.59267
BLM	0.779612	5.30621	5.3329	7.70E-06	0.000164119	3.58548
MRPL51	0.772314	8.1668	5.32428	7.89E-06	0.000167596	3.56124
MYC	-0.904019	8.00374	-5.32426	7.89E-06	0.000167596	3.56119
ARL4A	-0.507134	5.19306	-5.32414	7.90E-06	0.000167596	3.56084
YEATS4	0.833853	7.1208	5.32184	7.95E-06	0.000168469	3.55437
BTN3A3	0.978255	6.85647	5.3199	7.99E-06	0.000169173	3.54889
ASF1B	1.10287	5.73676	5.31709	8.06E-06	0.000170305	3.541
APEH	0.749278	7.65129	5.31654	8.07E-06	0.000170325	3.53946
BLK	-0.878919	6.19108	-5.3109	8.20E-06	0.000172883	3.52358
PELI2	-0.990854	6.93531	-5.31007	8.22E-06	0.000173044	3.52126
DHCR24	0.856476	5.65591	5.30901	8.25E-06	0.000173325	3.51827
HECTD3	0.548033	6.48277	5.30829	8.27E-06	0.000173436	3.51622
OXCT1	0.96988	6.1002	5.30625	8.32E-06	0.000174209	3.5105
CHCHD3	0.583278	6.45725	5.30443	8.36E-06	0.000174875	3.50539
DUT	0.772209	5.89549	5.30374	8.38E-06	0.000174972	3.50343
MRPL18	0.48755	7.57382	5.30006	8.47E-06	0.000176592	3.49309
RAB30	-0.947049	5.5538	-5.29942	8.48E-06	0.000176665	3.49128
STAMBP	0.487953	6.415	5.2974	8.53E-06	0.000177447	3.48559
MRPL19	0.572233	5.2733	5.29641	8.56E-06	0.0001777	3.48281
GMNN	1.28674	5.53186	5.29424	8.61E-06	0.000178563	3.47671
HIF1AN	0.580352	5.72605	5.29332	8.63E-06	0.00017857	3.47411
NUCKS1	0.747307	6.98365	5.29321	8.64E-06	0.00017857	3.47381
SNX9	-1.3396	5.84115	-5.29274	8.65E-06	0.00017857	3.47248
KLHDC3	0.645045	7.80628	5.29178	8.67E-06	0.000178812	3.46977
CLPP	0.746387	7.67576	5.28632	8.81E-06	0.000181404	3.45443
PHACTR2	0.874349	7.17501	5.28559	8.83E-06	0.000181528	3.45238
HIST1H2AI	0.805116	5.64501	5.28482	8.85E-06	0.000181675	3.4502
HIST1H2AH	0.764411	4.40783	5.284	8.87E-06	0.000181847	3.4479
PRMT5	0.6729	6.42948	5.28245	8.91E-06	0.000182396	3.44352
MPDU1	0.677273	6.70557	5.28198	8.92E-06	0.000182396	3.44221
PDCD10	0.447342	6.52336	5.2776	9.04E-06	0.000184465	3.4299
TK1	1.57678	6.27053	5.2766	9.06E-06	0.00018474	3.42708
GYG1	0.570362	8.08542	5.27536	9.10E-06	0.000185144	3.42358
RPA1	1.01719	8.36216	5.27401	9.13E-06	0.000185608	3.41979
SESN1	-0.555094	5.80971	-5.27167	9.19E-06	0.000186608	3.41321
PPP2R1B	0.52744	5.43422	5.27029	9.23E-06	0.000187093	3.40932
ETV3	-0.819348	6.59867	-5.26814	9.29E-06	0.000187998	3.40327
COX10	0.51445	7.28232	5.2655	9.36E-06	0.000189178	3.39584
SCAMP2	0.610823	6.94683	5.26483	9.38E-06	0.00018928	3.39396
PRPF38A	0.597098	7.69896	5.25859	9.55E-06	0.000192465	3.37642
CFL1	0.443777	8.38787	5.25513	9.65E-06	0.000193311	3.36668
CNOT1	0.917151	8.9402	5.25493	9.65E-06	0.000193311	3.36613
ECE1	-1.0931	6.85994	-5.25492	9.65E-06	0.000193311	3.36609
PHB	0.541447	6.91513	5.2549	9.65E-06	0.000193311	3.36602
CSRP1	0.749759	7.39694	5.25467	9.66E-06	0.000193311	3.36539
NUP43	0.540747	4.88565	5.25293	9.71E-06	0.000194017	3.3605
FBXO6	0.756516	7.37919	5.25053	9.78E-06	0.0001951	3.35376
GIMAP2	0.496165	6.75316	5.24882	9.82E-06	0.000195803	3.34893
RBCK1	0.468864	7.64265	5.24743	9.86E-06	0.000196256	3.34502
MRPL37	0.726163	8.42019	5.24706	9.87E-06	0.000196256	3.344
TRIP12	0.558722	8.28673	5.24595	9.91E-06	0.000196617	3.34087
SEC23IP	0.663496	5.65538	5.24351	9.98E-06	0.000197745	3.33399
TPST1	-0.454667	4.80758	-5.24268	1.00E-05	0.000197948	3.33166
ANKMY2	0.549084	5.87798	5.2415	1.00E-05	0.000198351	3.32836
ARRDC2	-0.567628	6.66651	-5.23749	1.02E-05	0.000200397	3.31707
MCOLN2	0.826379	6.05976	5.23681	1.02E-05	0.000200515	3.31517
FANCD2	0.711122	5.42991	5.23525	1.02E-05	0.000201152	3.31077
DPP4	0.706569	5.80021	5.22848	1.04E-05	0.000204589	3.29173
PLK3	-1.24009	6.12416	-5.22846	1.04E-05	0.000204589	3.29169
RAD50	0.736361	5.75968	5.2272	1.05E-05	0.000205064	3.28813
AP3M1	0.808093	6.97934	5.22662	1.05E-05	0.000205128	3.2865
ANAPC1	0.703798	6.95865	5.2249	1.05E-05	0.000205873	3.28166
HIST1H2BM	1.2022	5.87721	5.22356	1.06E-05	0.000206394	3.27789
ZBTB20	-0.635579	5.20375	-5.22274	1.06E-05	0.000206606	3.27558
NRIP1	-1.13704	7.81797	-5.22152	1.06E-05	0.000207055	3.27217
SOD2	-1.7631	9.33592	-5.21943	1.07E-05	0.000208033	3.26628
ACTR3	0.51532	9.70896	5.21381	1.09E-05	0.000211168	3.25048
CFL2	-0.824228	5.54721	-5.21087	1.10E-05	0.000212687	3.24222
CR1	-0.849153	5.9713	-5.20679	1.11E-05	0.000214933	3.23074
FAM111B	0.668679	4.79183	5.20385	1.12E-05	0.000216483	3.22247
LTA	-0.572116	6.62098	-5.20309	1.12E-05	0.000216667	3.22034
IL3RA	-0.59312	5.20319	-5.20195	1.13E-05	0.000217092	3.21714
VIM	-0.489058	10.9031	-5.19367	1.15E-05	0.00022207	3.19387
HIST1H3B	1.18046	4.71531	5.19071	1.16E-05	0.000223689	3.18554
XPO7	0.564185	6.69889	5.18894	1.17E-05	0.000224291	3.18057
RAD51C	0.685726	5.76356	5.18841	1.17E-05	0.000224291	3.17908
PFKFB3	-1.7632	8.82754	-5.1884	1.17E-05	0.000224291	3.17904
IL1R1	-0.899181	4.47106	-5.18716	1.17E-05	0.000224797	3.17557
MELK	1.63383	5.18446	5.18554	1.18E-05	0.000225557	3.17101
CDC25A	0.837615	4.49577	5.18458	1.18E-05	0.000225887	3.1683
ABCG1	-0.724513	5.48257	-5.18354	1.19E-05	0.000226264	3.1654
SLC25A20	1.02791	5.60514	5.18257	1.19E-05	0.000226605	3.16265
MRPS27	0.991624	6.88906	5.17959	1.20E-05	0.000228265	3.1543
CSTF2	0.743694	6.03125	5.17486	1.22E-05	0.000231114	3.141
PRC1	1.29106	5.88554	5.17413	1.22E-05	0.000231298	3.13895
CDC25B	0.966311	9.04153	5.17235	1.23E-05	0.00023198	3.13393
MT1X	1.50728	8.27882	5.17221	1.23E-05	0.00023198	3.13354
ZNF395	-0.682718	7.03128	-5.17071	1.23E-05	0.000232454	3.12933
TCF19	0.69376	4.78313	5.1706	1.23E-05	0.000232454	3.12901
RAC2	0.544931	11.1261	5.16967	1.24E-05	0.000232774	3.12641
HIST1H4C	1.20072	10.455	5.16869	1.24E-05	0.00023313	3.12366
HIST1H2BK	0.981254	10.4212	5.1664	1.25E-05	0.000234376	3.11723
TRAPPC1	0.640835	8.65203	5.16279	1.26E-05	0.000236539	3.10706
LAG3	1.54142	7.06069	5.16233	1.26E-05	0.000236543	3.10578
BANK1	-1.07149	6.43267	-5.16181	1.26E-05	0.000236593	3.10431
UPB1	-0.559982	4.6559	-5.1597	1.27E-05	0.000237731	3.0984
HIST1H3G	0.750207	4.88855	5.15875	1.28E-05	0.000238081	3.09572
ADSL	0.528228	8.11722	5.1577	1.28E-05	0.000238499	3.09276
WDR18	0.530269	7.45726	5.15385	1.29E-05	0.000240865	3.08194
LMNA	-0.521387	5.57065	-5.15105	1.30E-05	0.000242513	3.07408
AASDHPPT	0.548848	6.64646	5.14899	1.31E-05	0.000243652	3.06829
BOLA2	0.75936	8.39339	5.14422	1.33E-05	0.000246206	3.05489
MYADM	-0.664841	9.32414	-5.14414	1.33E-05	0.000246206	3.05468
DPF2	0.598511	7.86408	5.14406	1.33E-05	0.000246206	3.05444
NDUFS2	0.548552	6.0049	5.14339	1.33E-05	0.000246228	3.05257
CCNF	1.17682	6.12345	5.14314	1.33E-05	0.000246228	3.05186
PROK2	-1.16848	6.43879	-5.14159	1.34E-05	0.000247022	3.04749
TPST2	0.640724	8.32029	5.13806	1.35E-05	0.000249087	3.03759
HIATL1	1.08047	7.55004	5.13783	1.36E-05	0.000249087	3.03695
SLC25A5	0.667516	9.89204	5.13207	1.38E-05	0.000252965	3.02075
ARHGEF3	0.609881	8.3385	5.12764	1.40E-05	0.000255907	3.00832
NUP155	0.793852	6.66206	5.12411	1.41E-05	0.000258115	2.9984
LASP1	0.513521	10.1925	5.1238	1.41E-05	0.000258115	2.99753
ALPL	-1.09635	5.67253	-5.12187	1.42E-05	0.000259032	2.9921
CBLB	0.796356	7.98415	5.12165	1.42E-05	0.000259032	2.9915
HOXA5	-0.59546	4.66157	-5.12126	1.42E-05	0.000259032	2.99039
KLRD1	1.33024	7.63324	5.11944	1.43E-05	0.000260075	2.98528
PARP4	0.772383	8.63803	5.11718	1.44E-05	0.000261452	2.97894
RPIA	0.437675	7.49059	5.11245	1.46E-05	0.000264529	2.96565
SQSTM1	-0.534231	8.2887	-5.11227	1.46E-05	0.000264529	2.96516
CDT1	1.41674	6.13672	5.11089	1.47E-05	0.000265255	2.96128
NDUFA12	0.844614	8.93919	5.10843	1.48E-05	0.000266823	2.95436
KIF20A	1.18862	4.78071	5.10731	1.48E-05	0.000267353	2.95122
ACSL1	-1.49996	7.88811	-5.10339	1.50E-05	0.000269657	2.94023
IDE	0.554141	5.67863	5.1033	1.50E-05	0.000269657	2.93996
EOMES	1.21738	7.42535	5.10252	1.50E-05	0.000269657	2.93778
TBL1X	-0.385393	7.68272	-5.10225	1.50E-05	0.000269657	2.93702
ATPAF1	0.501935	6.20925	5.10182	1.50E-05	0.000269657	2.93582
PDHB	0.463933	8.08603	5.10176	1.51E-05	0.000269657	2.93563
XPO5	0.583576	5.80982	5.1005	1.51E-05	0.000270307	2.93209
SAAL1	0.681848	6.55017	5.0999	1.51E-05	0.000270441	2.9304
UBR1	0.579332	5.98232	5.09554	1.53E-05	0.000273539	2.91817
PELI1	-1.63995	8.12894	-5.09423	1.54E-05	0.000273892	2.9145
HCK	-1.04671	8.23121	-5.09392	1.54E-05	0.000273892	2.91362
RAD21	0.484171	8.50037	5.09381	1.54E-05	0.000273892	2.91332
CEBPB	-0.648536	9.42005	-5.09186	1.55E-05	0.000275103	2.90784
CAMK1D	-0.663861	6.19437	-5.09081	1.55E-05	0.000275604	2.90488
CALM3	0.487493	10.5442	5.0898	1.56E-05	0.000276072	2.90205
NFKBIE	-1.05694	6.80142	-5.0821	1.59E-05	0.000281664	2.88043
CDC42EP3	-1.16927	6.37738	-5.08203	1.59E-05	0.000281664	2.88024
PHF14	0.401485	5.01341	5.08043	1.60E-05	0.000282627	2.87575
IL13RA1	-1.24406	7.44422	-5.07727	1.62E-05	0.000284874	2.86689
NUTF2	0.565624	6.99833	5.07628	1.62E-05	0.000285322	2.86411
NDUFAB1	0.666923	7.99773	5.07589	1.62E-05	0.000285322	2.863
LYN	-0.9337	10.057	-5.07401	1.63E-05	0.000286529	2.85772
CSNK2A1P	0.678533	6.86545	5.06926	1.65E-05	0.000290142	2.84441
EDN1	-0.976626	5.28627	-5.06518	1.67E-05	0.00029324	2.83295
ARL6IP1	0.488867	7.20689	5.06284	1.68E-05	0.000294874	2.82639
SEMA7A	-1.3038	5.51563	-5.06139	1.69E-05	0.000295758	2.82231
CCT4	0.71695	6.99683	5.05983	1.70E-05	0.000296737	2.81793
C14orf166	0.48983	8.71919	5.05885	1.70E-05	0.000297216	2.81519
LDHB	0.576174	9.44767	5.05837	1.71E-05	0.000297268	2.81385
TNFRSF21	-1.06943	5.60676	-5.05737	1.71E-05	0.000297777	2.81102
MPP1	-0.921974	7.07259	-5.05581	1.72E-05	0.000298757	2.80667
KIAA0391	0.531417	6.96225	5.05348	1.73E-05	0.000300166	2.80013
DOCK10	0.570081	9.32994	5.05336	1.73E-05	0.000300166	2.79977
MRPL11	0.557733	6.4577	5.05179	1.74E-05	0.000301165	2.79539
LILRB2	-1.03205	8.69614	-5.05129	1.74E-05	0.000301244	2.79397
CCDC53	0.603615	7.62901	5.04927	1.75E-05	0.000302647	2.78831
ATP5C1	0.959635	9.1703	5.0441	1.78E-05	0.000306849	2.7738
PARP9	0.656177	6.81157	5.03777	1.81E-05	0.000311703	2.75604
DUSP8	-0.82885	5.84875	-5.03758	1.81E-05	0.000311703	2.75552
NDUFB3	0.643737	8.09278	5.03744	1.81E-05	0.000311703	2.75512
GTF2H1	0.442135	5.04276	5.03554	1.82E-05	0.000312708	2.74981
FOXP1	-0.605747	6.30822	-5.0355	1.82E-05	0.000312708	2.74969
FAM108A2	1.30709	7.82767	5.03127	1.85E-05	0.000316189	2.73782
PPIL1	0.897735	5.95165	5.02957	1.86E-05	0.000317373	2.73305
RBM28	0.52953	5.48521	5.02856	1.86E-05	0.000317923	2.73023
C12orf4	0.638555	6.12363	5.02667	1.87E-05	0.000318941	2.72492
MRPS15	0.62573	7.79655	5.02664	1.87E-05	0.000318941	2.72483
APLP2	-0.666844	6.95655	-5.02392	1.89E-05	0.000320842	2.71719
ADM	-1.12899	6.8862	-5.02377	1.89E-05	0.000320842	2.71678
NDUFAF1	0.541606	5.71976	5.02185	1.90E-05	0.000322248	2.71141
CNN2	0.441483	9.86369	5.01833	1.92E-05	0.000325173	2.70152
PHF1	-0.642322	6.96767	-5.01698	1.92E-05	0.000326049	2.69774
ARV1	0.476469	5.90568	5.01658	1.93E-05	0.000326049	2.69663
ECHDC1	0.448251	5.76269	5.01526	1.93E-05	0.000326919	2.69291
PRKCA	-0.613204	6.93359	-5.01403	1.94E-05	0.000327611	2.68946
CALR	0.847174	9.47762	5.01372	1.94E-05	0.000327611	2.68859
WDR77	0.539369	5.73365	5.01232	1.95E-05	0.00032855	2.68468
RNF130	-0.971333	7.94173	-5.01101	1.96E-05	0.000329416	2.681
IRAK3	-1.09543	7.29072	-5.00997	1.96E-05	0.000330024	2.67808
EHD4	-0.991967	7.32847	-5.00691	1.98E-05	0.000332577	2.66949
UBE2B	-0.415465	5.81041	-5.00637	1.98E-05	0.000332708	2.66798
IL6ST	-0.650908	6.60383	-5.00498	1.99E-05	0.000333654	2.66411
DCP2	0.518592	7.32799	5.00402	2.00E-05	0.000334071	2.66139
MRPS16	0.720058	6.93752	5.00372	2.00E-05	0.000334071	2.66058
HIGD1A	0.605591	8.246	5.00335	2.00E-05	0.000334071	2.65952
RAD54L	0.674809	4.53867	5.00286	2.00E-05	0.00033415	2.65816
TSPAN18	-0.531628	5.24548	-4.99875	2.03E-05	0.00033747	2.64664
NDUFS8	0.479282	8.33603	4.99835	2.03E-05	0.00033747	2.64552
TUBB6	-0.426916	5.62177	-4.99825	2.03E-05	0.00033747	2.64523
C15orf39	-1.1109	7.69367	-4.99466	2.05E-05	0.000340602	2.63518
CRY1	-0.621705	6.67152	-4.99411	2.06E-05	0.00034066	2.63363
SLC15A4	-0.540325	8.04573	-4.99374	2.06E-05	0.00034066	2.63258
GPR132	-0.752972	6.51437	-4.99341	2.06E-05	0.00034066	2.63166
VTI1B	0.591879	6.64559	4.99224	2.07E-05	0.000341423	2.62838
PRKACB	0.541042	5.39751	4.9909	2.08E-05	0.000342352	2.62464
MAP2K3	-0.792934	6.46429	-4.99007	2.08E-05	0.000342789	2.6223
LAMB3	-0.666657	4.75729	-4.98751	2.10E-05	0.000344938	2.61514
KCTD9	0.696304	5.80795	4.98452	2.11E-05	0.000347544	2.60675
C9orf64	0.486565	5.16724	4.98176	2.13E-05	0.000349936	2.59901
CKAP2	0.53252	5.47246	4.9789	2.15E-05	0.000352403	2.59099
TCP11L2	-0.629285	6.26768	-4.97854	2.15E-05	0.000352403	2.59
CAP1	0.623909	10.5748	4.9756	2.17E-05	0.000354998	2.58175
UNG	0.774923	6.12126	4.97497	2.17E-05	0.000354998	2.58
AMPD3	-0.533479	5.06274	-4.97483	2.17E-05	0.000354998	2.5796
CD300E	-0.95363	5.91812	-4.97442	2.18E-05	0.000355014	2.57846
ARHGAP19	0.83663	6.54875	4.97066	2.20E-05	0.0003585	2.5679
HMGN4	0.525578	8.51225	4.96715	2.22E-05	0.000361745	2.55809
EZH2	0.985961	6.30747	4.96603	2.23E-05	0.000362514	2.55494
DONSON	0.843183	5.14242	4.96178	2.26E-05	0.000366284	2.54305
RABGEF1	-0.765745	6.23471	-4.96168	2.26E-05	0.000366284	2.54275
PSMC2	0.693928	8.93126	4.96012	2.27E-05	0.000367524	2.53839
SHQ1	0.59014	5.26566	4.9595	2.27E-05	0.000367765	2.53666
CCRN4L	-0.779825	5.71693	-4.95721	2.29E-05	0.000369795	2.53025
XPOT	0.79708	6.01179	4.95514	2.30E-05	0.000371608	2.52443
ELF4	0.446043	8.31129	4.95469	2.31E-05	0.000371671	2.52317
UBR2	0.59669	7.4749	4.95343	2.31E-05	0.000372608	2.51966
ORM1	-1.33554	4.85717	-4.95039	2.33E-05	0.000375481	2.51114
C9orf72	-0.791839	5.85445	-4.94682	2.36E-05	0.00037896	2.50114
CD1C	-0.971463	5.35357	-4.94543	2.37E-05	0.000380065	2.49724
LYPD3	-0.566992	4.9813	-4.94119	2.40E-05	0.000384324	2.48538
IFT57	-0.425475	5.6722	-4.93935	2.41E-05	0.000385948	2.48022
RGS16	-0.531907	4.63172	-4.93885	2.41E-05	0.00038608	2.47882
PPP3CB	0.499539	7.46689	4.937	2.43E-05	0.000387718	2.47365
CLEC5A	-0.503772	4.34002	-4.93537	2.44E-05	0.000389118	2.46908
GLCCI1	0.599695	6.09175	4.93448	2.44E-05	0.000389693	2.46658
ICMT	0.64629	6.32427	4.93307	2.45E-05	0.000390851	2.46264
ECHS1	0.429512	7.28756	4.93137	2.47E-05	0.000392342	2.45788
CMTM2	-0.589019	4.39609	-4.92564	2.51E-05	0.000398456	2.44186
DPEP2	-0.753147	7.0672	-4.92488	2.51E-05	0.000398893	2.43973
CCR6	-0.377508	7.65833	-4.92327	2.52E-05	0.000400316	2.43522
ASCC2	0.364517	8.15945	4.92037	2.55E-05	0.000403247	2.4271
POP7	0.499382	6.37137	4.9162	2.58E-05	0.000407695	2.41542
E2F3	0.491116	6.78589	4.9151	2.59E-05	0.000408477	2.41236
BARD1	0.788797	5.45217	4.91478	2.59E-05	0.000408477	2.41144
HMMR	1.39484	4.9167	4.91413	2.59E-05	0.000408792	2.40963
TOP2B	0.647072	8.77186	4.91212	2.61E-05	0.000410721	2.40402
UBE2T	1.07603	5.31518	4.90924	2.63E-05	0.000413266	2.39595
SNRPD1	0.757309	6.3837	4.90923	2.63E-05	0.000413266	2.39593
XRCC5	0.98077	8.27805	4.90681	2.65E-05	0.000415711	2.38917
PRELID1	0.489734	7.96054	4.90072	2.69E-05	0.000422643	2.37212
REPIN1	-0.552531	6.82858	-4.89784	2.72E-05	0.000425723	2.36405
HIVEP1	-0.826966	6.42616	-4.89681	2.73E-05	0.000426525	2.36117
DNAJC13	0.725738	6.61626	4.89462	2.74E-05	0.000428761	2.35506
TNFAIP6	-1.65605	5.51766	-4.89414	2.75E-05	0.00042879	2.35372
SLC43A1	0.595996	5.54409	4.89385	2.75E-05	0.00042879	2.35289
AREG	-0.734566	4.65085	-4.89294	2.76E-05	0.000429446	2.35037
GDI2	0.58798	9.52236	4.88799	2.80E-05	0.000435066	2.3365
CDC6	0.750565	4.36685	4.88734	2.80E-05	0.000435066	2.3347
EIF2AK1	0.520781	8.81241	4.88733	2.80E-05	0.000435066	2.33466
SULF2	-0.911196	6.71901	-4.88197	2.85E-05	0.000441389	2.31967
ZNF571	-0.443399	4.56806	-4.88119	2.85E-05	0.000441652	2.3175
HIST1H2BO	0.966473	5.35629	4.88099	2.85E-05	0.000441652	2.31695
LILRB3	-0.499502	9.3306	-4.88064	2.86E-05	0.000441652	2.31596
C10orf55	-1.28301	4.91622	-4.88014	2.86E-05	0.000441817	2.31456
MDH2	0.575595	9.33805	4.87847	2.87E-05	0.000443481	2.30988
IL2RA	-0.916269	4.81431	-4.8778	2.88E-05	0.000443854	2.30803
MRPL27	0.481145	6.10528	4.87679	2.89E-05	0.000444679	2.3052
PXMP2	0.759148	5.54127	4.87556	2.90E-05	0.000445791	2.30175
GPR97	-1.24749	5.67382	-4.87432	2.91E-05	0.000446545	2.29828
PPCDC	-0.515056	5.79614	-4.87423	2.91E-05	0.000446545	2.29805
TRAF1	-0.851053	6.07867	-4.87074	2.94E-05	0.000450599	2.28828
BTN3A2	0.923205	8.50301	4.86903	2.95E-05	0.000451688	2.28351
ANKRD12	-0.605728	7.63184	-4.86839	2.96E-05	0.000451688	2.28171
NUP210	0.873761	8.07505	4.86829	2.96E-05	0.000451688	2.28144
TBCE	0.572985	5.79824	4.86796	2.96E-05	0.000451688	2.28052
RAB11FIP1	-0.597312	6.83608	-4.86774	2.96E-05	0.000451688	2.27991
RPA2	0.696903	7.85199	4.86761	2.97E-05	0.000451688	2.27952
UBASH3A	0.778775	6.52407	4.86733	2.97E-05	0.000451688	2.27874
PFN1	0.499198	11.6446	4.86535	2.99E-05	0.000453801	2.27321
CD80	-0.527923	4.16536	-4.86468	2.99E-05	0.000454203	2.27133
HAL	-0.69254	4.91896	-4.86086	3.02E-05	0.000458464	2.26067
ICAM1	-1.47661	6.85859	-4.86072	3.03E-05	0.000458464	2.26026
MCCC2	0.554027	4.8701	4.85871	3.04E-05	0.000460242	2.25466
POLD3	0.667755	5.08596	4.85865	3.04E-05	0.000460242	2.25449
FYN	0.608101	8.10521	4.8565	3.06E-05	0.000462616	2.2485
ZAP70	0.924001	7.5316	4.8557	3.07E-05	0.000463206	2.24625
DIAPH1	0.771033	8.36197	4.84916	3.13E-05	0.000471559	2.22796
PIK3CA	-0.749947	6.54324	-4.84816	3.14E-05	0.000472425	2.22518
CPD	-0.79921	8.30079	-4.84341	3.18E-05	0.000478454	2.21191
GIMAP6	0.624056	7.09443	4.83663	3.24E-05	0.000487406	2.19299
GPR114	0.936003	7.0074	4.83585	3.25E-05	0.000487998	2.1908
ITGB7	0.77596	8.81237	4.83471	3.26E-05	0.000489105	2.1876
UPF3B	0.516299	5.852	4.8316	3.29E-05	0.000492998	2.17893
TRERF1	0.565686	6.49062	4.82884	3.32E-05	0.000496434	2.17122
FAM49B	0.466623	7.92014	4.82683	3.34E-05	0.0004988	2.16562
SNRPB2	0.638474	7.9416	4.8247	3.36E-05	0.000501355	2.15968
EXOSC10	0.45673	7.36957	4.82212	3.38E-05	0.000504596	2.15245
STMN1	1.03368	6.29423	4.82045	3.40E-05	0.000506507	2.14779
ARHGAP30	0.741582	8.65665	4.8175	3.43E-05	0.000510305	2.13957
KLF9	-0.659706	8.09325	-4.81685	3.43E-05	0.000510742	2.13774
KLHDC4	0.529314	6.76472	4.8158	3.45E-05	0.000511765	2.13481
POLDIP2	0.588004	6.91295	4.8153	3.45E-05	0.000511972	2.13342
PRKAG1	0.626033	6.70139	4.81456	3.46E-05	0.000512537	2.13136
HSPD1	0.600041	8.08324	4.8112	3.49E-05	0.000516997	2.12199
PTPN11	0.460625	8.56734	4.80573	3.55E-05	0.000524704	2.1067
GSS	0.639748	6.22379	4.80534	3.55E-05	0.000524751	2.10562
LILRB1	-0.488028	8.30956	-4.80392	3.57E-05	0.000526369	2.10165
ELP3	0.586557	6.91012	4.80223	3.58E-05	0.00052835	2.09695
ARHGAP11A	0.607999	5.40155	4.8019	3.59E-05	0.00052835	2.09604
RAB27A	0.696304	6.61421	4.80062	3.60E-05	0.000529765	2.09246
BRI3BP	0.619217	6.25084	4.79501	3.66E-05	0.000537878	2.07679
IL6R	-0.691834	6.06208	-4.79409	3.67E-05	0.00053856	2.07423
CD24	-0.873538	5.48694	-4.79386	3.67E-05	0.00053856	2.07359
EXOSC1	0.494082	7.05984	4.79191	3.69E-05	0.00054053	2.06815
EBP	0.935013	7.11262	4.79189	3.69E-05	0.00054053	2.0681
PHB2	0.780731	8.68631	4.78939	3.72E-05	0.000543495	2.06113
ZNF267	-0.912254	6.24868	-4.78896	3.72E-05	0.000543495	2.05992
TRIO	-0.48669	4.88565	-4.78894	3.72E-05	0.000543495	2.05986
LGALS3	-0.631809	7.96652	-4.78797	3.73E-05	0.0005443	2.05717
UBL7	0.582443	6.82202	4.78772	3.74E-05	0.0005443	2.05647
VBP1	0.539765	6.96376	4.78591	3.76E-05	0.000546603	2.05141
XPO1	0.599869	7.71068	4.78516	3.76E-05	0.000547232	2.04932
SAP130	0.505824	7.67434	4.78469	3.77E-05	0.000547418	2.04802
SPN	0.928137	7.58142	4.78287	3.79E-05	0.00054974	2.04295
SLC38A5	0.555249	5.40048	4.78092	3.81E-05	0.000551515	2.0375
GLG1	0.584459	9.15403	4.78092	3.81E-05	0.000551515	2.0375
RAD9A	0.622759	6.52504	4.78071	3.81E-05	0.000551515	2.03691
FAM120A	0.461482	9.26836	4.78028	3.82E-05	0.000551639	2.03572
RNF34	0.580432	6.91505	4.77726	3.85E-05	0.000555905	2.02731
ASNA1	0.586473	5.89329	4.77258	3.90E-05	0.000562903	2.01426
FLJ45445	-0.876274	6.8871	-4.77203	3.91E-05	0.000563244	2.01271
CD9	-0.508049	5.21787	-4.77157	3.91E-05	0.000563416	2.01144
TXLNA	0.503819	7.78329	4.7697	3.94E-05	0.000565389	2.00623
UQCRC2	0.686811	8.40417	4.76967	3.94E-05	0.000565389	2.00613
HES1	-0.60501	4.30515	-4.76821	3.95E-05	0.000567207	2.00207
CHEK1	1.31331	5.45222	4.76682	3.97E-05	0.000568601	1.9982
RANBP2	-0.61108	6.86007	-4.76667	3.97E-05	0.000568601	1.99777
UFC1	0.656689	8.04415	4.76465	3.99E-05	0.000571355	1.99214
CFLAR	-0.522611	7.89518	-4.76411	4.00E-05	0.00057168	1.99063
NRIP3	-0.52023	4.40363	-4.76352	4.01E-05	0.000572083	1.98899
LOC257358	-1.01209	4.62842	-4.76172	4.03E-05	0.000574488	1.98398
HMGN2	1.0558	9.40128	4.76077	4.04E-05	0.000575495	1.98133
CYC1	0.623021	8.51953	4.75629	4.09E-05	0.000582411	1.96884
KIF21A	0.420728	4.73139	4.75454	4.11E-05	0.000584777	1.96397
GUF1	0.605613	5.76569	4.7531	4.13E-05	0.000586632	1.95995
HIST1H2BI	0.997611	5.02846	4.75174	4.15E-05	0.000588352	1.95617
ELAC2	0.55837	6.36016	4.75053	4.16E-05	0.000589337	1.9528
LAT	0.581909	7.70314	4.75035	4.16E-05	0.000589337	1.95231
MTMR2	0.423358	5.22757	4.75013	4.16E-05	0.000589337	1.9517
MED8	0.452827	5.56357	4.74927	4.17E-05	0.000590223	1.94929
CBFB	0.747321	7.96622	4.74855	4.18E-05	0.00059087	1.94729
NUDT21	0.675547	6.37707	4.74802	4.19E-05	0.000591199	1.9458
IL18	-0.455227	7.81958	-4.74687	4.20E-05	0.000592583	1.94259
PAPOLA	0.477297	9.24323	4.74529	4.22E-05	0.000594703	1.9382
ATP2A2	0.568598	7.81843	4.74433	4.23E-05	0.000595761	1.93553
CHI3L1	-0.773674	4.80527	-4.74351	4.24E-05	0.000596469	1.93325
REL	-0.830022	7.80071	-4.74324	4.25E-05	0.000596469	1.9325
NDUFB5	0.464046	7.23614	4.7408	4.28E-05	0.000600096	1.9257
ZNF160	-0.36789	5.54523	-4.74005	4.29E-05	0.000600815	1.9236
TLE4	-0.434668	7.6969	-4.73757	4.32E-05	0.000604539	1.9167
RGS18	-1.21265	7.29788	-4.73181	4.39E-05	0.000614074	1.90065
TAF1B	0.585431	5.46201	4.73131	4.40E-05	0.000614354	1.89927
LRG1	-0.668998	5.90683	-4.72809	4.44E-05	0.000619476	1.89032
SKP2	0.645493	6.24742	4.72763	4.44E-05	0.000619708	1.88902
RALGPS2	-0.724489	5.08994	-4.72611	4.46E-05	0.000621823	1.88479
JAM3	-0.545603	5.46345	-4.72453	4.48E-05	0.000624062	1.88039
RAB1B	0.619383	7.82322	4.72394	4.49E-05	0.000624507	1.87876
ADH5	0.428193	5.11787	4.72259	4.51E-05	0.000626349	1.87499
HIST1H2BD	0.867084	6.02947	4.72222	4.51E-05	0.000626412	1.87396
IDH3G	0.51297	8.01391	4.72081	4.53E-05	0.000628348	1.87004
IRF2BP2	-1.13352	8.40852	-4.72042	4.54E-05	0.00062845	1.86896
IBTK	0.495671	6.65414	4.71735	4.58E-05	0.000633436	1.8604
BTN3A1	0.649905	7.59131	4.7146	4.61E-05	0.000637859	1.85275
GLUL	-1.07105	6.39886	-4.71387	4.62E-05	0.000638592	1.85072
CPEB2	-0.669328	5.83062	-4.71097	4.66E-05	0.00064332	1.84267
KIAA0100	0.489639	6.35935	4.70853	4.70E-05	0.00064725	1.83586
HIST1H3D	0.531641	4.40469	4.70745	4.71E-05	0.000648419	1.83285
CSF2RB	-0.69206	6.15827	-4.70724	4.71E-05	0.000648419	1.83227
PRDX2	0.865426	6.91461	4.70616	4.73E-05	0.000649817	1.82927
HIF1A	-1.07237	8.60973	-4.70569	4.73E-05	0.000650069	1.82797
SLC25A11	0.470279	6.4998	4.70533	4.74E-05	0.000650119	1.82697
HIST1H2BL	0.605813	4.18009	4.70415	4.76E-05	0.000651718	1.82368
ETFB	0.432702	7.19287	4.70164	4.79E-05	0.000655821	1.81671
SUGT1	0.591026	6.4307	4.70123	4.80E-05	0.000655971	1.81556
CASP3	0.747676	7.08676	4.69351	4.90E-05	0.000669615	1.79408
MAP3K7	0.491328	7.26992	4.69334	4.91E-05	0.000669615	1.79362
XRCC6	0.488776	8.4219	4.69292	4.91E-05	0.000669615	1.79246
PRPF19	0.62267	7.27638	4.69277	4.91E-05	0.000669615	1.79203
HDC	-0.527145	4.55445	-4.69196	4.93E-05	0.000670536	1.78979
CFDP1	0.413373	6.15321	4.69021	4.95E-05	0.000673301	1.7849
USP5	0.804317	7.2255	4.68505	5.02E-05	0.000682488	1.77056
C6orf211	0.402994	4.98818	4.68485	5.03E-05	0.000682488	1.77
MTCH2	0.566502	6.47636	4.68226	5.06E-05	0.000686938	1.76282
ARMC1	0.488507	6.62192	4.68017	5.10E-05	0.000690345	1.757
GPR174	0.496227	6.13516	4.67989	5.10E-05	0.000690345	1.75623
SMPDL3A	-0.553437	4.76229	-4.67861	5.12E-05	0.000692243	1.75267
NCOR1	0.639119	7.05164	4.67655	5.15E-05	0.000695428	1.74693
DENND1C	0.475826	7.06938	4.67636	5.15E-05	0.000695428	1.74642
NCF2	-0.974364	7.62934	-4.67451	5.18E-05	0.000698501	1.74126
ETFDH	0.588614	5.55969	4.67136	5.23E-05	0.00070407	1.73253
DNAJC11	0.442348	5.82447	4.6711	5.23E-05	0.00070407	1.73179
NIF3L1	0.483315	6.32147	4.67033	5.24E-05	0.000704965	1.72966
REXO2	0.528187	7.03424	4.66896	5.26E-05	0.000707095	1.72585
IFIT5	-1.05378	6.5685	-4.6673	5.29E-05	0.000709815	1.72124
PPP2R5E	0.604845	7.90795	4.66531	5.32E-05	0.000712935	1.71572
NFAT5	-0.619526	6.60361	-4.66491	5.32E-05	0.000712935	1.7146
LILRA2	-0.829452	7.28224	-4.66481	5.33E-05	0.000712935	1.71431
SKAP1	0.928456	7.59082	4.66162	5.38E-05	0.000718095	1.70545
TRPV2	0.607441	7.09256	4.66136	5.38E-05	0.000718095	1.70473
PBK	1.046	4.52025	4.66109	5.38E-05	0.000718095	1.70399
AUH	0.568065	5.45883	4.66101	5.38E-05	0.000718095	1.70376
CLPX	0.490507	6.62579	4.66047	5.39E-05	0.000718555	1.70225
GJB6	-0.392556	4.36734	-4.65731	5.44E-05	0.000724449	1.69348
PDXK	-0.461247	7.03635	-4.65393	5.50E-05	0.000730839	1.68411
RBBP8	0.725141	6.18664	4.65167	5.53E-05	0.000734941	1.67782
ATP5H	0.667344	10.21	4.65062	5.55E-05	0.000736121	1.67491
LILRA5	-1.04067	8.01887	-4.65047	5.55E-05	0.000736121	1.67449
KMO	-0.450287	4.5603	-4.64907	5.57E-05	0.000738402	1.67062
COMMD4	0.621276	6.74383	4.64493	5.64E-05	0.000746581	1.6591
ZCRB1	0.637586	6.75753	4.64433	5.65E-05	0.000747168	1.65746
LAIR1	-0.342031	9.25193	-4.64357	5.66E-05	0.000748128	1.65533
ERH	0.653931	8.49949	4.64319	5.67E-05	0.000748257	1.65428
KLHL12	0.533654	6.77898	4.64108	5.70E-05	0.000751301	1.64843
RUVBL2	0.761907	6.5075	4.64084	5.71E-05	0.000751301	1.64777
UBE2L3	0.498932	7.63786	4.64082	5.71E-05	0.000751301	1.6477
SKIV2L2	0.504202	7.22723	4.63949	5.73E-05	0.000753498	1.644
SBK1	0.688525	7.23554	4.63893	5.74E-05	0.000754012	1.64246
GPS1	0.430522	7.56736	4.63503	5.80E-05	0.000761503	1.63163
ITGB8	-0.518432	3.997	-4.63475	5.81E-05	0.000761503	1.63086
C12orf61	-0.530506	4.594	-4.63454	5.81E-05	0.000761503	1.63029
PPM1K	-0.443564	5.89897	-4.63375	5.82E-05	0.000762559	1.62807
POLE2	1.15595	5.0421	4.63311	5.83E-05	0.000763263	1.6263
HP1BP3	0.546632	7.23067	4.63245	5.85E-05	0.000764014	1.62447
NUP107	0.54816	6.1719	4.63205	5.85E-05	0.000764198	1.62336
NAT10	0.482928	7.30093	4.63135	5.86E-05	0.000765046	1.62142
FCHSD2	-0.630528	7.38727	-4.6302	5.88E-05	0.000766873	1.61824
MIF4GD	0.613894	7.08063	4.62854	5.91E-05	0.000769848	1.61363
SOS1	0.755662	6.00662	4.62743	5.93E-05	0.000771502	1.61053
FAM102A	-0.578917	7.56251	-4.62717	5.94E-05	0.000771502	1.60982
HINT2	0.615314	6.97737	4.62492	5.97E-05	0.000775803	1.60358
RASGEF1B	-1.28023	6.03119	-4.62157	6.03E-05	0.000782619	1.59428
IGBP1	0.50396	8.39605	4.61223	6.20E-05	0.000803205	1.56838
COPA	0.543351	8.91524	4.61125	6.21E-05	0.000804737	1.56567
CSNK1G1	0.416159	5.62233	4.60899	6.25E-05	0.000809249	1.55941
PSMD3	0.564258	6.28843	4.608	6.27E-05	0.00081084	1.55665
UCHL5	0.665513	6.22398	4.60693	6.29E-05	0.000812597	1.5537
NR1D2	-0.540594	6.1538	-4.60468	6.33E-05	0.00081713	1.54747
CAPN2	0.510161	7.25224	4.60392	6.35E-05	0.000817558	1.54534
GABPB2	0.56534	5.46576	4.60388	6.35E-05	0.000817558	1.54523
PPP1CC	0.516935	9.69282	4.60325	6.36E-05	0.000818291	1.5435
GBA	0.478112	6.97294	4.6029	6.36E-05	0.000818396	1.54251
CCT5	0.529942	6.05596	4.60259	6.37E-05	0.000818396	1.54165
NDUFV1	0.565391	8.07883	4.60208	6.38E-05	0.000818853	1.54025
ICOSLG	-0.595983	5.43312	-4.60162	6.39E-05	0.000819203	1.53898
FAM72A	0.707758	5.28474	4.60115	6.40E-05	0.000819363	1.53768
PSMB7	0.486229	8.98222	4.60093	6.40E-05	0.000819363	1.53707
WDR12	0.526521	5.52821	4.60036	6.41E-05	0.000819983	1.53548
PSMB1	0.473453	8.95512	4.59807	6.45E-05	0.000824656	1.52914
KIAA0101	0.716599	8.00641	4.5953	6.51E-05	0.000830511	1.52147
B4GALT3	0.457399	7.32852	4.59478	6.51E-05	0.00083101	1.52003
API5	0.497521	7.98171	4.59369	6.54E-05	0.000832878	1.51701
MANBA	-0.531002	6.93805	-4.59266	6.55E-05	0.000834627	1.51414
RBMX2	0.405595	6.49006	4.59157	6.58E-05	0.000836507	1.51111
OGFOD1	0.579235	6.55326	4.59062	6.59E-05	0.000838041	1.50849
EFTUD2	0.648334	8.00035	4.58883	6.63E-05	0.000841618	1.50353
ZMPSTE24	0.481574	8.05393	4.58579	6.69E-05	0.000848251	1.49512
MMD	-1.00181	7.44513	-4.58468	6.71E-05	0.00085022	1.49203
KLRC4	0.792184	6.36475	4.58351	6.73E-05	0.000852318	1.48881
FXYD5	-0.565115	9.11086	-4.57942	6.81E-05	0.000861644	1.47747
SKIL	-0.890299	5.55611	-4.57879	6.82E-05	0.000862023	1.47572
NUP93	0.501926	7.15773	4.57865	6.82E-05	0.000862023	1.47535
MLH1	0.606195	6.21814	4.57509	6.89E-05	0.000870136	1.46547
CXorf21	-0.750285	5.18318	-4.57304	6.94E-05	0.000874498	1.45981
AGMAT	0.75388	5.45169	4.57212	6.95E-05	0.000876043	1.45726
SGPL1	0.423785	6.06753	4.57084	6.98E-05	0.0008785	1.45372
KIAA1147	-0.584352	7.34094	-4.56873	7.02E-05	0.00088308	1.44786
DDX1	0.605696	8.02465	4.56764	7.04E-05	0.000885054	1.44487
S100A9	-0.5965	11.5052	-4.56644	7.07E-05	0.000887332	1.44155
WDR7	0.606802	6.23278	4.56081	7.18E-05	0.000900411	1.42597
SDC4	-0.753377	4.95421	-4.56074	7.18E-05	0.000900411	1.42577
SERPINB10	-0.667552	4.44024	-4.55785	7.24E-05	0.00090713	1.41777
HIST1H1D	0.510555	4.23609	4.55708	7.26E-05	0.000908334	1.41565
VPS72	0.470718	5.2958	4.5566	7.27E-05	0.000908801	1.41431
GNA12	-0.506678	6.41986	-4.55538	7.30E-05	0.000911188	1.41095
OSBPL3	0.486639	5.43133	4.55324	7.34E-05	0.000916026	1.40501
SPI1	-0.935623	7.88641	-4.5526	7.35E-05	0.000916716	1.40325
HIST1H4L	0.771462	4.90594	4.55237	7.36E-05	0.000916716	1.40261
RNASE6	-1.03813	6.81202	-4.55063	7.40E-05	0.000920497	1.39781
HIST1H1E	0.71406	7.84623	4.54873	7.44E-05	0.000924754	1.39253
GRSF1	0.461828	7.40919	4.54535	7.51E-05	0.000932947	1.3832
HN1	0.574656	6.14351	4.54196	7.58E-05	0.000941267	1.37381
NEDD8	0.52921	9.19676	4.5399	7.63E-05	0.000945044	1.36812
NEK7	0.532767	5.20433	4.53979	7.63E-05	0.000945044	1.36781
ODF2	0.435356	6.17096	4.53966	7.63E-05	0.000945044	1.36746
FBXO22	0.420514	4.86298	4.53797	7.67E-05	0.000948811	1.3628
DYNC1H1	0.569923	7.82622	4.53746	7.68E-05	0.000949398	1.36137
EXOSC8	0.473356	6.57172	4.53556	7.72E-05	0.000953764	1.35613
LYPLA1	0.397908	5.53754	4.5325	7.79E-05	0.000961342	1.34768
CHD1	-0.602626	8.34232	-4.52994	7.85E-05	0.000967616	1.34058
NUP50	0.476698	6.51109	4.52873	7.88E-05	0.000970149	1.33724
DIAPH3	0.47837	4.06068	4.52494	7.96E-05	0.000979905	1.32678
SARS2	0.595083	6.26294	4.52422	7.98E-05	0.000981081	1.3248
ANP32B	0.557639	10.0021	4.52286	8.01E-05	0.000984082	1.32103
IFI35	0.719342	7.90649	4.52012	8.07E-05	0.000991007	1.31346
DNAJC7	0.657713	8.25376	4.51982	8.08E-05	0.000991009	1.31263
DYNLL1	0.676181	7.76169	4.51862	8.11E-05	0.000993579	1.30931
EGR3	-0.775436	6.02251	-4.51313	8.24E-05	0.00100847	1.29417
ARHGAP1	0.649603	8.65404	4.51168	8.27E-05	0.00101181	1.29016
ACADM	0.38807	6.74456	4.51027	8.30E-05	0.00101506	1.28626
RFC1	0.539889	6.9451	4.50954	8.32E-05	0.00101632	1.28424
USP12	-0.613485	6.10693	-4.50862	8.34E-05	0.00101794	1.2817
SNX6	0.377024	7.34774	4.50839	8.35E-05	0.00101794	1.28107
WHSC1	0.508508	5.28361	4.50606	8.41E-05	0.00102391	1.27463
ABCB10	0.533391	6.4387	4.50442	8.44E-05	0.00102723	1.2701
TGFBI	-0.977756	8.30069	-4.50434	8.45E-05	0.00102723	1.26988
ACOT7	1.0833	6.45484	4.50308	8.48E-05	0.00103007	1.2664
TAPBPL	0.256527	7.19803	4.50265	8.49E-05	0.00103045	1.26523
FOS	-0.819589	10.1251	-4.49982	8.56E-05	0.00103799	1.2574
NUMB	-0.5958	7.72557	-4.49759	8.61E-05	0.00104376	1.25125
EED	0.467073	4.93991	4.49578	8.66E-05	0.00104829	1.24627
EXOSC5	0.729941	7.13912	4.49421	8.70E-05	0.00105213	1.24194
COPZ1	0.784249	7.82218	4.49241	8.74E-05	0.00105669	1.23697
DPAGT1	0.393998	6.00823	4.49181	8.76E-05	0.0010576	1.23532
MCRS1	0.439832	7.55261	4.49122	8.77E-05	0.00105766	1.23368
PTP4A1	-0.582908	7.02903	-4.49121	8.77E-05	0.00105766	1.23365
PHF19	0.566255	6.30087	4.48925	8.82E-05	0.00106272	1.22825
ARRDC3	-0.816996	7.4255	-4.48891	8.83E-05	0.00106287	1.22731
POLQ	1.10369	4.73094	4.48667	8.89E-05	0.00106883	1.22112
SUZ12	0.490342	8.90629	4.48369	8.96E-05	0.00107698	1.21292
CSNK1E	-0.410759	6.98404	-4.48343	8.97E-05	0.00107698	1.21219
IRF2	0.513897	6.08606	4.48162	9.02E-05	0.00108168	1.20719
LOC399744	-0.465305	6.71353	-4.48076	9.04E-05	0.00108344	1.20482
DLG3	0.350629	4.51129	4.48021	9.05E-05	0.00108425	1.20331
HSPH1	0.744804	7.74867	4.47937	9.07E-05	0.00108594	1.20101
NFKB1	-1.03951	9.6322	-4.47561	9.17E-05	0.0010968	1.19062
COPS6	0.39861	7.04456	4.47402	9.21E-05	0.00110089	1.18624
TMCO1	0.496228	7.68476	4.47243	9.26E-05	0.001105	1.18185
DCTN3	0.597669	6.583	4.47121	9.29E-05	0.00110792	1.17852
SLC9A9	0.561766	6.04884	4.46504	9.45E-05	0.0011267	1.16149
RAB10	0.542878	8.90573	4.46476	9.46E-05	0.0011267	1.16074
C12orf52	0.432585	6.0127	4.45908	9.62E-05	0.00114425	1.14507
KLHL15	-0.845085	6.29608	-4.45795	9.65E-05	0.00114699	1.14197
BAK1	0.685461	6.50904	4.4571	9.67E-05	0.00114814	1.13961
DUSP16	-0.562899	5.49378	-4.45702	9.67E-05	0.00114814	1.13941
PARP11	0.555377	5.84104	4.45515	9.73E-05	0.00115335	1.13426
ATP6V0A2	0.477338	6.23222	4.45387	9.76E-05	0.00115603	1.13073
MVP	0.542045	7.87556	4.45376	9.76E-05	0.00115603	1.13044
DAPP1	-0.484583	8.13313	-4.45186	9.82E-05	0.00116139	1.1252
PHOSPHO1	-0.735882	5.4035	-4.45033	9.86E-05	0.00116553	1.12098
FGFRL1	-0.459393	5.83617	-4.44759	9.94E-05	0.00117373	1.11344
MAP4K4	-0.57557	6.87511	-4.44663	9.97E-05	0.00117569	1.11079
SLC4A1AP	0.403189	5.87317	4.44619	9.98E-05	0.00117569	1.10957
RASGRP4	-0.596803	5.8299	-4.44615	9.98E-05	0.00117569	1.10947
TMEM109	0.964482	8.20047	4.44368	0.000100497	0.00118305	1.10268
KLF7	-0.693676	5.94446	-4.4387	0.000101939	0.00119903	1.08898
FKBP4	0.551097	6.22592	4.43697	0.000102445	0.001204	1.08421
ERAL1	0.634077	6.78448	4.43457	0.000103153	0.00121133	1.07759
SH2D2A	0.600177	5.80297	4.43276	0.000103687	0.00121661	1.07262
TMEM55A	-0.571076	5.30413	-4.43245	0.000103779	0.00121667	1.07177
RNF5	0.496454	6.80327	4.43217	0.000103862	0.00121667	1.071
SSBP3	0.671217	6.93874	4.43177	0.00010398	0.00121706	1.06991
PPID	0.574964	5.45645	4.43055	0.000104345	0.00122034	1.06654
ITM2A	0.598904	6.36795	4.42985	0.000104553	0.0012208	1.06462
MTHFD2	0.71976	6.95249	4.42968	0.000104605	0.0012208	1.06415
CCR5	0.57634	4.21479	4.42934	0.000104706	0.0012208	1.06322
DAD1	0.634803	9.57845	4.42916	0.00010476	0.0012208	1.06272
DDOST	0.498174	8.44416	4.42899	0.00010481	0.0012208	1.06226
BIRC5	1.15818	5.50753	4.42576	0.000105785	0.00123116	1.05336
SESN3	-0.607708	6.49874	-4.42435	0.000106212	0.0012342	1.04948
SERPINA1	-0.92908	8.61376	-4.42405	0.000106303	0.0012342	1.04866
RNF24	-0.719866	6.29998	-4.42404	0.000106305	0.0012342	1.04864
GHRL	-0.386895	4.85108	-4.42013	0.000107501	0.00124709	1.03788
POU6F1	-0.311847	4.55539	-4.41929	0.00010776	0.00124824	1.03557
NDUFA8	0.476748	7.30547	4.41917	0.000107796	0.00124824	1.03525
LCMT1	0.469103	7.1077	4.41896	0.000107862	0.00124824	1.03466
CD68	-0.82881	9.1241	-4.4185	0.000108003	0.00124853	1.0334
VRK3	0.58385	6.6967	4.41831	0.000108061	0.00124853	1.03289
SERTAD2	-0.542139	8.25922	-4.41783	0.000108211	0.00124925	1.03156
BMPR2	-0.4373	6.28601	-4.41676	0.000108541	0.00125206	1.02863
G6PD	0.504045	7.90023	4.41571	0.000108868	0.00125483	1.02573
AP1M1	0.540409	8.65812	4.4132	0.000109651	0.00126283	1.01884
SLC16A6	-0.887428	6.7742	-4.41291	0.000109743	0.00126288	1.01803
AP2B1	0.691123	7.38205	4.41092	0.00011037	0.00126907	1.01256
C1orf112	0.619961	4.84448	4.41	0.00011066	0.00126991	1.01004
NTAN1	0.605909	7.63364	4.4099	0.000110691	0.00126991	1.00977
BID	-0.619227	7.12425	-4.40985	0.000110708	0.00126991	1.00962
PDIA3P	0.496217	6.08516	4.40953	0.000110808	0.00127004	1.00875
SLC2A3	-0.686384	10.3775	-4.40679	0.000111681	0.00127903	1.00121
PLEKHA1	-0.491712	6.76521	-4.40525	0.000112173	0.00128363	0.996981
LMAN2	0.619633	7.08639	4.40097	0.000113553	0.00129839	0.985223
CHD7	-0.662353	6.55957	-4.39997	0.000113877	0.00130106	0.982486
IFI16	0.837632	9.42047	4.39802	0.000114513	0.00130729	0.977128
MRPS34	0.683606	6.8908	4.39625	0.000115093	0.00131232	0.972271
SLC35A4	0.542176	7.24212	4.39612	0.000115137	0.00131232	0.971906
DCTN2	0.508207	7.91247	4.39549	0.000115344	0.00131364	0.970179
BZW2	0.506476	6.86036	4.39471	0.0001156	0.00131551	0.968044
GANAB	0.582565	7.49728	4.39233	0.00011639	0.00132345	0.961501
DCXR	0.47223	8.21535	4.39076	0.000116912	0.00132834	0.957196
USP47	-0.367748	6.61766	-4.38942	0.00011736	0.00133208	0.953526
NCL	0.546381	9.9434	4.38922	0.000117427	0.00133208	0.95297
FCHO2	-0.455224	4.35011	-4.38667	0.000118288	0.00134079	0.94595
GAS7	-0.594965	6.0894	-4.38363	0.000119317	0.00135138	0.937625
RPN2	0.494074	7.942	4.38253	0.000119692	0.0013538	0.934612
SDHD	0.418712	7.38642	4.38245	0.000119719	0.0013538	0.93439
SAMSN1	-1.05462	6.8533	-4.38134	0.0001201	0.00135704	0.931339
L3MBTL2	0.450259	6.29379	4.38102	0.00012021	0.00135721	0.930459
IQSEC1	-0.502187	8.39264	-4.37919	0.000120841	0.00136326	0.925429
MRPS5	0.59973	7.14798	4.37686	0.000121647	0.00137127	0.919041
OGFRL1	-0.93901	7.1589	-4.37626	0.000121854	0.00137254	0.917401
GABARAPL1	-0.743521	7.83557	-4.37412	0.000122602	0.00137987	0.911526
EIF5B	0.621145	6.88808	4.37371	0.000122745	0.0013804	0.910406
GNAQ	-0.854	6.44781	-4.37135	0.000123575	0.00138864	0.903928
EXOC2	0.571383	6.47077	4.37068	0.00012381	0.0013902	0.902101
HK2	-0.57114	6.19688	-4.37011	0.000124013	0.00139139	0.900528
PBX2	-0.374113	6.99621	-4.36851	0.00012458	0.00139665	0.896146
COQ9	0.575459	6.67849	4.36361	0.000126333	0.0014152	0.882718
EIF1	-0.52846	10.9972	-4.3619	0.000126951	0.00142017	0.878026
RNF122	-0.534993	5.25251	-4.36184	0.000126974	0.00142017	0.877851
HIST1H2AG	0.732818	5.84351	4.36053	0.000127448	0.00142436	0.874272
PPP1R13B	-0.421204	5.37021	-4.36004	0.000127627	0.00142526	0.872922
CRY2	-0.443337	6.03693	-4.35885	0.000128064	0.00142902	0.869643
PSMD10	0.501992	6.51833	4.35818	0.000128306	0.0014306	0.867828
ARHGEF6	0.613154	9.50804	4.35745	0.000128575	0.00143249	0.865814
MGAM	-0.953758	4.98806	-4.35708	0.00012871	0.00143288	0.864809
SNX17	0.509085	7.72596	4.35523	0.000129392	0.00143936	0.859727
ANAPC7	0.540677	5.32907	4.35245	0.000130422	0.00144969	0.852111
MRPS18B	0.532051	7.3563	4.34975	0.000131428	0.00145975	0.844727
HRSP12	0.314854	4.30053	4.34842	0.000131927	0.00146416	0.841085
VPREB3	-0.816746	5.99397	-4.34699	0.000132469	0.00146699	0.837148
ATG16L2	-0.576339	7.03282	-4.34688	0.00013251	0.00146699	0.83685
GPR89A	0.487672	5.89276	4.34669	0.000132582	0.00146699	0.836332
STK38	0.664824	8.67386	4.34666	0.000132591	0.00146699	0.836267
IQGAP2	0.639129	7.7089	4.34565	0.000132974	0.00147009	0.833496
ULK1	-0.36076	7.55129	-4.34526	0.000133122	0.00147036	0.832424
TRIP13	1.12597	4.97339	4.34505	0.000133203	0.00147036	0.83184
PTX3	-0.593671	4.24196	-4.34477	0.00013331	0.00147041	0.831067
FCF1	0.464938	5.23748	4.34316	0.000133924	0.00147604	0.826658
B4GALT1	-0.507218	7.81255	-4.34189	0.000134407	0.00148023	0.823198
CD99	0.583559	8.34029	4.3406	0.000134904	0.00148457	0.81965
HADHA	0.479063	7.99201	4.33772	0.000136013	0.00149471	0.811787
FUT11	0.485345	5.21292	4.33767	0.000136034	0.00149471	0.811642
RARS	0.52453	7.63006	4.3372	0.000136218	0.00149559	0.81034
WEE1	0.707943	5.76556	4.33542	0.000136908	0.00150201	0.805489
C1orf21	0.585767	5.1595	4.33504	0.000137058	0.00150251	0.804439
SF3B2	0.500977	8.62169	4.33424	0.000137369	0.00150398	0.802259
CPSF6	0.485588	6.36744	4.33408	0.000137432	0.00150398	0.80182
SLC25A13	-0.362516	5.41282	-4.33389	0.000137507	0.00150398	0.801297
BMF	-0.48722	5.22822	-4.33248	0.00013806	0.00150804	0.797441
SHMT2	0.65084	8.09676	4.33238	0.000138102	0.00150804	0.797151
WDFY2	-0.479736	6.06779	-4.33215	0.000138193	0.00150804	0.796518
NBPF1	-0.424224	5.76386	-4.33157	0.000138418	0.00150935	0.794951
ARID4B	-0.588724	7.53157	-4.33091	0.000138679	0.00151054	0.793148
TRIM59	0.465361	4.83241	4.33076	0.000138738	0.00151054	0.792737
YBX1	0.475917	9.74164	4.32887	0.000139488	0.0015175	0.787556
CAMK2N1	-0.524963	5.56768	-4.32834	0.000139699	0.0015175	0.78611
HIST1H1B	0.644797	4.00172	4.32825	0.000139735	0.0015175	0.785859
NHLRC2	0.454886	5.74252	4.328	0.000139835	0.0015175	0.785174
CLEC7A	-0.916916	6.65493	-4.32782	0.000139907	0.0015175	0.784681
KPNA3	0.612746	7.59398	4.3267	0.000140356	0.00152123	0.781604
CPNE1	0.622381	7.57576	4.32606	0.000140612	0.0015214	0.779854
SUV39H1	0.667321	6.7005	4.32602	0.000140626	0.0015214	0.779754
SEPHS2	0.400126	7.24095	4.32586	0.00014069	0.0015214	0.779319
SUCLA2	0.487156	6.00508	4.32532	0.000140905	0.00152258	0.77785
OSBPL10	-0.732487	5.1	-4.32431	0.000141312	0.00152566	0.77508
ALG1	0.482589	5.39768	4.32394	0.000141464	0.00152566	0.774052
LRRC37B	-0.454821	6.80605	-4.3236	0.0001416	0.00152566	0.77313
NDRG3	0.5977	7.81097	4.32356	0.000141615	0.00152566	0.773025
PDZD11	0.599216	5.08702	4.32161	0.000142406	0.00153099	0.767677
MAPK1	0.513103	7.91241	4.32156	0.000142424	0.00153099	0.767552
LTB	-0.761727	9.00541	-4.32155	0.00014243	0.00153099	0.767516
PIM3	-0.744804	7.21873	-4.31983	0.000143127	0.00153723	0.762827
LMAN1	0.573879	6.36498	4.31959	0.000143225	0.00153723	0.762172
NEDD9	-0.386226	5.77874	-4.31907	0.000143438	0.00153837	0.760742
PTGES	-0.419401	4.95621	-4.31279	0.000146025	0.00156494	0.743579
APOL3	0.607592	6.91212	4.30889	0.000147657	0.00158032	0.732905
SNX5	0.632387	6.64557	4.30883	0.00014768	0.00158032	0.732758
HIST1H4I	0.395318	4.33508	4.30688	0.000148504	0.00158796	0.727414
OGDH	0.69798	6.62231	4.30615	0.000148812	0.00158907	0.725425
LIG1	0.65224	6.84848	4.30611	0.00014883	0.00158907	0.725312
GPR160	-0.516807	5.14778	-4.30555	0.000149066	0.0015904	0.723791
LGMN	-0.568575	5.15589	-4.30417	0.000149652	0.00159547	0.720022
XRN1	0.423148	7.55795	4.30316	0.000150087	0.00159873	0.717236
VEGFB	-0.328763	6.99886	-4.30294	0.00015018	0.00159873	0.716642
PECR	0.42833	5.93615	4.29954	0.00015164	0.00161308	0.707352
TNIK	0.645852	6.19904	4.29891	0.000151913	0.00161478	0.705624
STARD7	0.59236	8.94025	4.29772	0.000152426	0.00161904	0.702389
PLP2	-0.59778	7.80255	-4.29727	0.000152623	0.00161992	0.701153
KLF10	-0.806128	6.76296	-4.2958	0.000153264	0.00162352	0.69713
ACTR2	0.672416	10.3461	4.29576	0.000153277	0.00162352	0.697045
LRRC32	-0.486316	4.86257	-4.29571	0.000153301	0.00162352	0.696899
ERGIC1	-0.436066	6.25195	-4.29435	0.000153894	0.00162859	0.693193
HIST1H4D	1.08809	5.93823	4.29397	0.000154064	0.00162919	0.692132
TCEAL8	0.451551	6.50769	4.29357	0.000154239	0.00162985	0.691038
PTBP1	0.55221	10.3838	4.29316	0.000154415	0.00163051	0.689944
NEFH	0.618677	5.52503	4.2909	0.000155411	0.00163982	0.683772
UROD	0.44729	6.73995	4.288	0.0001567	0.00165169	0.675847
METTL3	0.677489	7.00718	4.28785	0.000156766	0.00165169	0.675439
ELOVL1	0.451426	6.53204	4.28709	0.000157106	0.00165405	0.673365
DACH1	-0.290349	4.05331	-4.28663	0.000157313	0.00165501	0.672102
RAB7L1	1.03344	8.07845	4.28576	0.000157702	0.0016579	0.669727
S100A12	-1.06293	8.83776	-4.2848	0.000158132	0.0016612	0.667113
NCF4	-0.826134	6.88697	-4.28376	0.000158603	0.00166493	0.664258
CCDC25	0.450744	6.25072	4.28217	0.000159318	0.0016711	0.659942
VPS54	0.424366	5.01877	4.28194	0.000159424	0.0016711	0.659307
RFX2	-0.337409	4.91185	-4.2814	0.000159669	0.00167245	0.65783
PDCD4	-0.465782	9.59778	-4.27757	0.000161416	0.00168952	0.647386
FCGR1A	0.979943	6.04143	4.27312	0.000163473	0.00170979	0.635239
DYNLT3	-0.582352	5.30197	-4.2725	0.00016376	0.00171155	0.633553
DAXX	0.581753	6.06369	4.27158	0.000164189	0.00171479	0.631041
CSNK2B	0.387678	8.3273	4.27062	0.00016464	0.00171824	0.628413
C9orf114	0.32906	7.01786	4.26765	0.000166033	0.00173153	0.620325
SPCS3	0.573286	7.02479	4.26507	0.000167255	0.001743	0.613293
BST2	0.559171	7.40454	4.26419	0.000167676	0.00174612	0.610877
ARRDC4	-0.694199	5.27186	-4.26157	0.000168926	0.00175786	0.603751
TREML2	-0.551305	5.44412	-4.25941	0.000169968	0.00176742	0.597855
PSMD4	0.457213	7.43706	4.25894	0.000170197	0.00176852	0.596562
DCP1B	0.398956	4.75929	4.25622	0.000171515	0.00178093	0.589158
HARS	0.410219	7.25459	4.25411	0.000172544	0.00179032	0.583421
RRAGD	-0.572712	5.65015	-4.25217	0.000173499	0.00179893	0.578125
STT3A	0.874732	7.99088	4.24977	0.000174683	0.0018099	0.571602
HIST1H4E	0.672371	6.63747	4.24825	0.000175443	0.00181646	0.567439
TDRD7	-0.762104	6.56845	-4.24779	0.00017567	0.00181749	0.566199
PTPN9	0.590001	5.68334	4.24637	0.000176383	0.00182281	0.562316
HYOU1	0.784844	7.00956	4.24625	0.000176438	0.00182281	0.562014
GTSE1	0.716374	5.01315	4.24534	0.000176897	0.00182616	0.559523
HRK	-0.385329	5.50157	-4.2451	0.000177016	0.00182616	0.558875
SERPINF1	-0.516768	4.90168	-4.24419	0.000177478	0.0018296	0.556378
THAP1	0.48306	5.48871	4.24339	0.000177881	0.00183245	0.554201
COBLL1	-0.722498	5.14734	-4.24262	0.000178267	0.0018351	0.552122
ARPC2	0.35943	10.2684	4.24204	0.000178563	0.00183683	0.55053
PRKCE	-0.452047	5.05709	-4.24084	0.000179173	0.00184178	0.547263
SRM	0.554656	7.39358	4.2395	0.000179855	0.00184747	0.543616
POLR2B	0.813362	7.79011	4.23489	0.000182224	0.00187047	0.531067
SLC16A10	-0.347014	4.6684	-4.23435	0.000182504	0.00187123	0.529596
MRPL15	0.462175	6.34813	4.23409	0.000182635	0.00187123	0.528908
FYB	0.493472	9.66685	4.23378	0.0001828	0.00187123	0.528042
C10orf76	0.520504	6.66946	4.23374	0.000182819	0.00187123	0.527939
CAPN1	0.442629	8.59242	4.23316	0.000183122	0.00187298	0.526354
LNPEP	0.446842	6.59764	4.23268	0.000183369	0.00187418	0.525057
TRAP1	0.567918	6.90584	4.23194	0.000183756	0.0018768	0.523036
PSIP1	0.511836	6.86884	4.2316	0.000183931	0.00187707	0.522128
RNASET2	-0.483047	8.7371	-4.23138	0.000184044	0.00187707	0.521534
PER1	-0.687636	6.03421	-4.23105	0.000184221	0.00187754	0.520614
TNIP1	-0.734723	8.09357	-4.22642	0.000186657	0.00190069	0.508017
YPEL5	-0.602367	9.19568	-4.22623	0.000186758	0.00190069	0.507501
UBB	0.359746	10.4915	4.2253	0.000187251	0.00190435	0.504973
TES	0.376986	6.68926	4.22387	0.000188009	0.00191071	0.501099
PAX5	-0.651746	5.66136	-4.2233	0.000188314	0.00191132	0.499542
THRAP3	0.352217	6.85226	4.22326	0.000188335	0.00191132	0.499434
ITGA4	0.899026	7.96142	4.21971	0.000190243	0.00192932	0.489772
CRLF2	-0.566799	4.68246	-4.21918	0.000190526	0.00193082	0.488347
CSF1	-0.550239	5.11229	-4.21504	0.000192778	0.00195227	0.477078
CDK5R1	-0.342079	5.26328	-4.21277	0.000194023	0.00196349	0.47091
FFAR2	-2.02334	6.73518	-4.21117	0.000194905	0.00197103	0.46656
APOBEC3D	0.894092	6.08466	4.21052	0.000195264	0.00197326	0.464798
IGF1R	-0.52806	5.39677	-4.20971	0.000195709	0.00197638	0.462612
C8orf76	0.415554	6.55921	4.20858	0.000196341	0.00198136	0.459525
HIST1H2AE	1.06714	6.93493	4.20824	0.000196527	0.00198184	0.458617
CCNG1	0.425224	7.51159	4.20729	0.00019706	0.00198582	0.45602
THBD	-0.604626	5.67202	-4.20205	0.000200007	0.00201371	0.441791
MTIF2	0.45093	6.07735	4.20187	0.000200108	0.00201371	0.441305
HIST1H2BE	0.454938	4.27915	4.1985	0.000202029	0.00203162	0.432149
ALDH9A1	0.431691	7.91739	4.19693	0.00020293	0.00203925	0.427883
ZNF467	-0.738507	6.99713	-4.196	0.000203463	0.00204317	0.425372
TOR1A	0.472413	7.64531	4.19344	0.000204948	0.00205664	0.418402
NSD1	0.383596	6.04933	4.19272	0.000205363	0.00205937	0.416463
PDCD5	0.49556	6.78581	4.19108	0.000206317	0.00206735	0.412022
CYP4F3	-0.560061	4.86352	-4.19086	0.000206449	0.00206735	0.411406
TPP2	0.437096	6.5245	4.19061	0.000206591	0.00206735	0.410747
TMCC1	-0.358464	4.89866	-4.18965	0.000207155	0.00207155	0.408137
GLT1D1	-0.752768	5.67914	-4.18828	0.000207962	0.00207817	0.404412
SMEK2	0.476987	7.26479	4.18715	0.00020863	0.00208339	0.401339
NAP1L4	0.510181	8.52563	4.18448	0.000210211	0.00209772	0.394103
RGPD5	-0.63119	6.18195	-4.18379	0.000210621	0.00210036	0.392235
CIAPIN1	0.536431	6.08708	4.18128	0.000212125	0.00211346	0.385418
METTL2A	0.494379	5.31498	4.18095	0.000212324	0.00211346	0.384517
HPS3	0.917275	7.10071	4.18086	0.000212377	0.00211346	0.384281
DHX34	-0.358178	6.06445	-4.17716	0.000214609	0.00213419	0.374262
ORM2	-0.931672	4.62895	-4.1748	0.000216051	0.00214704	0.367847
FAM35A	0.406499	5.86136	4.17341	0.000216904	0.00215374	0.36407
MRPL35	0.518007	5.76622	4.17321	0.000217025	0.00215374	0.363539
PADI4	-0.915227	6.84067	-4.17183	0.000217876	0.00216069	0.35979
CRKL	0.396989	8.60186	4.17097	0.000218403	0.00216443	0.357472
METAP1	0.493277	7.02316	4.17049	0.000218702	0.00216589	0.356161
SLFN11	0.390171	6.0832	4.16886	0.00021971	0.00217394	0.351757
SLC39A7	0.403252	5.24681	4.16867	0.000219832	0.00217394	0.351227
C15orf41	0.477187	4.83384	4.16845	0.00021997	0.00217394	0.350626
KIAA0355	-0.666962	7.14216	-4.16788	0.000220322	0.00217409	0.349094
MAL	-0.788703	7.95397	-4.16763	0.000220478	0.00217409	0.348415
POLR3GL	0.455261	7.51781	4.16753	0.000220537	0.00217409	0.348157
SIT1	0.545715	5.50705	4.16745	0.000220591	0.00217409	0.347925
TRIM14	0.468512	5.97248	4.16506	0.000222089	0.00218735	0.341442
MEA1	0.440668	6.66144	4.1593	0.000225734	0.00222102	0.325847
RLF	-0.649706	6.86226	-4.15917	0.000225817	0.00222102	0.325497
NECAP1	-0.57829	7.83265	-4.1575	0.000226888	0.00223003	0.320964
DHX29	0.497311	6.41016	4.15648	0.00022754	0.00223491	0.318214
ACTR1A	0.399506	7.90636	4.15579	0.000227986	0.00223776	0.316338
TBCD	0.573842	6.80939	4.15521	0.000228362	0.00223991	0.314762
TRAF3IP2	-0.36147	5.61925	-4.15481	0.000228619	0.0022405	0.313683
ANAPC5	0.523593	8.29781	4.15463	0.000228734	0.0022405	0.313202
CSTA	-0.780977	5.36068	-4.1522	0.000230308	0.00225437	0.306636
NSL1	0.361164	4.93159	4.15025	0.000231582	0.00226397	0.30135
HIST1H2BB	0.536337	4.1549	4.15018	0.000231631	0.00226397	0.301147
PARP3	0.354837	6.08958	4.14998	0.000231761	0.00226397	0.300611
CALU	0.476335	6.49002	4.14938	0.000232154	0.00226627	0.298987
CTCF	0.544638	7.88658	4.14861	0.000232657	0.00226963	0.296917
H3F3B	-0.694727	10.4688	-4.14777	0.000233212	0.0022735	0.294634
MRPL1	0.48386	6.73553	4.1471	0.000233656	0.00227628	0.292812
FDFT1	0.485543	8.1706	4.14624	0.000234221	0.00228023	0.2905
GHITM	0.441698	9.62762	4.146	0.000234379	0.00228023	0.289853
SOD1	0.525676	9.74058	4.14562	0.00023463	0.00228112	0.288829
TMBIM1	-0.465025	6.93921	-4.14434	0.000235485	0.00228789	0.285345
ATG4A	0.441138	5.34698	4.14296	0.000236406	0.00229528	0.281608
CLSTN1	0.601325	8.0363	4.13911	0.00023899	0.0023188	0.2712
BRIP1	0.512643	4.15299	4.1386	0.00023933	0.00232053	0.269838
ASH2L	0.497027	7.16789	4.13738	0.000240158	0.00232698	0.266531
KCNA3	-0.48263	6.32686	-4.13701	0.000240412	0.00232788	0.265517
ZBTB38	0.445867	4.659	4.13583	0.000241214	0.00233407	0.262329
USP48	0.41456	5.99397	4.1333	0.000242944	0.00234923	0.255486
PWP1	0.54398	7.70178	4.13257	0.000243443	0.00235246	0.253522
RPS6KB2	0.347115	8.16719	4.12993	0.000245262	0.00236844	0.246397
SNUPN	0.429931	6.44379	4.12918	0.000245787	0.00237192	0.24435
CD2	0.711579	9.19409	4.12632	0.000247779	0.00238953	0.236623
DPP8	0.495882	6.54653	4.12606	0.000247957	0.00238965	0.235935
ABCF2	0.535208	6.293	4.12415	0.000249302	0.00240099	0.230758
TSSC1	0.557642	6.42864	4.12338	0.000249839	0.00240456	0.228695
RNF11	-0.438875	5.65261	-4.12281	0.000250245	0.00240685	0.227141
SNTB2	0.519356	6.26606	4.12212	0.000250734	0.00240994	0.225272
NEIL1	-0.582832	5.37942	-4.11688	0.000254468	0.00244419	0.211123
KYNU	-0.811072	6.31268	-4.11502	0.000255803	0.00245537	0.206114
SBF2	-0.560102	5.19847	-4.1136	0.000256836	0.00246363	0.202259
RYK	-0.411625	6.89009	-4.11333	0.000257027	0.00246382	0.201547
CD160	0.822974	6.62972	4.1123	0.000257779	0.00246938	0.198751
ANKRD32	0.403111	4.75053	4.11028	0.000259248	0.00248179	0.193313
MAN1A2	0.365513	5.90225	4.11001	0.000259445	0.00248202	0.192587
MSH6	0.607964	7.17289	4.10977	0.000259623	0.00248207	0.191931
UPP1	-0.533487	6.99994	-4.10933	0.000259944	0.00248348	0.190748
NUDC	0.444406	8.01689	4.10462	0.000263421	0.00251503	0.17803
ADSS	0.410892	8.01783	4.10383	0.000264008	0.00251858	0.1759
AZIN1	-0.74731	8.54759	-4.10365	0.000264144	0.00251858	0.175407
GBF1	0.74309	6.75902	4.10335	0.000264362	0.00251899	0.174619
SBDS	-0.649085	8.0085	-4.10073	0.000266326	0.00253602	0.167536
WIPF1	0.49499	7.5657	4.08624	0.000277427	0.00263897	0.128467
NUP188	0.665267	6.6086	4.08614	0.000277505	0.00263897	0.128197
RAB31	-1.0479	9.08152	-4.08428	0.000278963	0.00265108	0.123184
PYGL	-0.955911	6.83498	-4.08333	0.000279711	0.0026554	0.120624
LRBA	0.538401	7.56538	4.08323	0.000279789	0.0026554	0.120357
ENC1	0.972341	6.60817	4.07933	0.000282875	0.00268292	0.109864
GPR171	0.738962	4.95463	4.07904	0.000283108	0.00268336	0.109077
CCDC28A	0.375932	7.18334	4.07832	0.000283682	0.0026859	0.107139
DIP2B	-0.453088	7.75533	-4.07823	0.000283751	0.0026859	0.106906
AIP	0.558634	8.22431	4.07706	0.00028469	0.00269145	0.103748
C1QB	0.871168	6.07596	4.0769	0.000284819	0.00269145	0.103312
PMAIP1	-0.739698	8.02499	-4.0768	0.0002849	0.00269145	0.103043
FCRL2	-0.538847	4.60466	-4.07618	0.000285394	0.00269434	0.101386
WASL	-0.404459	6.6162	-4.07537	0.000286048	0.00269874	0.0991964
CXCR4	-1.32553	10.0506	-4.07272	0.000288188	0.00271558	0.0920674
MOV10	0.476482	6.53575	4.07269	0.000288211	0.00271558	0.0919894
PRDM8	-0.623411	6.04443	-4.07043	0.000290054	0.00273115	0.0858952
WDR67	0.534486	5.98098	4.06925	0.000291015	0.0027384	0.0827319
RAP1GDS1	0.478609	5.54937	4.06898	0.000291242	0.00273875	0.0819852
CSTF3	0.360401	5.57838	4.06802	0.000292027	0.00274433	0.0794114
PARP2	0.488681	5.27683	4.06771	0.000292283	0.00274493	0.0785753
CCDC90B	0.413575	7.14776	4.06627	0.000293468	0.00275426	0.0747056
MPV17	0.42249	7.0053	4.06354	0.000295732	0.0027731	0.0673569
BRAF	-0.429079	5.97645	-4.06338	0.000295862	0.0027731	0.0669357
MGLL	-0.422722	4.66747	-4.06269	0.000296438	0.00277668	0.0650774
NFATC2	0.553178	5.97706	4.06227	0.000296788	0.00277815	0.0639472
KIFC1	1.27551	5.95136	4.06175	0.000297226	0.00278044	0.0625384
APOA1BP	0.535872	7.06748	4.06106	0.000297802	0.00278401	0.0606863
SLC6A6	-0.496513	6.04418	-4.06051	0.000298266	0.00278653	0.0591991
DNAJC17	0.268825	5.85921	4.05978	0.000298881	0.00279046	0.0572289
GPR84	-1.39653	5.2994	-4.0579	0.000300464	0.00280192	0.0521784
YWHAE	0.682503	7.13195	4.05786	0.000300498	0.00280192	0.0520685
SH3BGRL2	-0.991456	5.4595	-4.05674	0.000301446	0.00280893	0.049057
NOMO2	0.476931	6.40568	4.05614	0.000301953	0.00281182	0.0474527
TCHP	0.456656	5.82603	4.05331	0.000304365	0.00283117	0.0398442
IDH3B	0.421681	8.20852	4.05324	0.000304424	0.00283117	0.039658
WDR19	-0.368619	5.10391	-4.05241	0.000305135	0.00283577	0.0374305
ALG6	0.427186	5.63724	4.0522	0.000305314	0.00283577	0.0368674
MALT1	-0.337203	7.3778	-4.05149	0.00030593	0.00283965	0.0349403
TMEM71	-0.535083	8.06721	-4.05015	0.00030708	0.00284848	0.0313537
AURKA	1.00493	5.54339	4.04979	0.000307393	0.00284852	0.0303821
TTC3	-0.473251	7.35484	-4.04969	0.000307482	0.00284852	0.0301048
SMARCAL1	0.46212	6.10274	4.04803	0.000308916	0.00285996	0.0256558
NUP85	0.537664	6.76593	4.04639	0.000310347	0.00287136	0.0212385
S100A8	-0.51161	9.96488	-4.046	0.000310686	0.00287265	0.0201944
SERINC1	-0.499077	8.45724	-4.04494	0.000311609	0.00287933	0.0173578
IL2RG	0.756085	8.25549	4.04209	0.000314114	0.00289906	0.0097048
JAK3	0.442228	6.27895	4.04205	0.000314149	0.00289906	0.0096002
R3HDM1	0.324721	6.38263	4.03985	0.000316103	0.00291522	0.0036728
TIFA	0.3621	5.5757	4.03942	0.00031648	0.00291682	0.00253454
DOCK11	0.575261	9.03914	4.03878	0.000317052	0.00292022	0.000806734
UBL5	0.464077	7.1842	4.03839	0.000317396	0.00292141	-0.00022808
THOC3	0.708537	6.51881	4.03812	0.000317645	0.00292141	-0.000977236
CIT	0.527736	4.47379	4.03795	0.000317792	0.00292141	-0.001421
CDC16	0.369164	7.73907	4.03719	0.000318476	0.00292432	-0.00347461
HCST	0.542348	9.57185	4.03714	0.000318517	0.00292432	-0.00359822
PDIA4	0.638495	6.39085	4.0361	0.000319453	0.00293104	-0.00640255
HIST1H4B	0.547934	4.62677	4.03555	0.000319946	0.00293236	-0.00787608
NOD1	0.315954	5.5871	4.03548	0.000320006	0.00293236	-0.0080547
SERPINB9	-0.685324	7.10304	-4.03507	0.000320373	0.00293385	-0.00915136
PKN2	-0.437964	6.03882	-4.03357	0.000321722	0.00294433	-0.0131685
PDK3	0.454419	6.21212	4.03172	0.000323405	0.00295785	-0.0181541
CLK4	-0.344954	5.81356	-4.02975	0.000325193	0.00297231	-0.0234238
CLEC4A	-0.807546	6.72033	-4.0288	0.000326065	0.00297838	-0.0259816
CD81	0.418255	9.52494	4.02738	0.000327367	0.00298601	-0.0297891
SLC12A6	-0.526876	6.42055	-4.02734	0.000327408	0.00298601	-0.0299099
STK40	-0.671913	8.44062	-4.02721	0.000327525	0.00298601	-0.0302492
TNFAIP2	-1.24475	7.51408	-4.0237	0.000330767	0.00301348	-0.0396624
SPINT2	-0.703171	6.60615	-4.02349	0.000330958	0.00301348	-0.0402139
TTLL12	0.572706	6.50543	4.02323	0.000331206	0.00301383	-0.0409299
UTP14A	0.514969	6.25275	4.0229	0.000331508	0.00301466	-0.0418005
SIRPB1	-0.762581	6.4494	-4.02101	0.000333275	0.00302881	-0.0468786
ASTL	-0.450807	5.06529	-4.0206	0.000333656	0.00303007	-0.0479715
LPPR2	-0.629645	6.06534	-4.02034	0.000333898	0.00303007	-0.0486632
PFDN1	0.46166	7.15038	4.02012	0.000334112	0.00303007	-0.049277
C18orf25	-0.400044	7.52005	-4.01996	0.000334258	0.00303007	-0.0496935
NDUFB11	0.500484	8.91795	4.01867	0.00033547	0.00303914	-0.053151
DCUN1D5	0.630843	6.48854	4.01729	0.000336775	0.00304903	-0.0568611
NDUFS6	0.386717	5.14722	4.01671	0.000337321	0.00305206	-0.05841
AP3D1	0.623376	7.51085	4.01549	0.000338481	0.00306062	-0.0616876
AAAS	0.499402	5.57087	4.01404	0.00033986	0.00307115	-0.0655724
FCGR2B	-0.517585	5.09016	-4.01316	0.000340692	0.00307674	-0.0679094
TSC22D3	-0.49168	7.95945	-4.01221	0.000341602	0.00308302	-0.070458
SMARCAD1	0.445163	5.4668	4.01063	0.000343119	0.00309476	-0.0746896
PNPLA1	-0.392625	4.54855	-4.01037	0.000343371	0.00309509	-0.0753918
CCDC47	0.459481	6.69251	4.00794	0.000345717	0.00311236	-0.0818964
PEX11B	0.407715	6.79963	4.00778	0.000345878	0.00311236	-0.0823403
PGM2L1	-0.401737	4.75386	-4.00772	0.000345938	0.00311236	-0.0825068
RFXANK	0.522695	6.87453	4.0058	0.000347804	0.00312718	-0.087643
JOSD1	-0.560254	7.79553	-4.00547	0.000348122	0.00312809	-0.0885176
C6orf89	0.456835	5.92088	4.00488	0.0003487	0.00313132	-0.0901027
TPD52L2	-0.405908	7.88777	-4.00415	0.000349416	0.00313578	-0.0920608
CD3E	0.699901	8.35263	4.00348	0.000350071	0.0031397	-0.0938506
FEM1C	-0.61557	7.31002	-4.00321	0.000350342	0.00314017	-0.0945887
NOMO1	0.599442	7.71301	4.00129	0.000352231	0.00315513	-0.0997259
AKR1B1	0.599088	7.4252	4.00099	0.000352521	0.00315576	-0.100511
DOLPP1	0.446279	5.78878	4.00054	0.000352967	0.00315778	-0.101719
HSP90AA1	0.469629	10.1989	4.00019	0.000353312	0.00315889	-0.102651
SAMD9L	0.701128	8.21902	3.99914	0.000354358	0.00316628	-0.105475
FAM96A	0.408143	7.09395	3.9979	0.000355591	0.00317532	-0.108792
GDAP1	0.420086	4.64347	3.99628	0.000357206	0.00318769	-0.11312
PIGK	0.661637	6.17604	3.9953	0.000358191	0.00318769	-0.115748
MTFMT	0.409521	4.63364	3.99527	0.00035822	0.00318769	-0.115827
SRC	-0.619397	5.91861	-3.99522	0.00035827	0.00318769	-0.11596
KLF11	-0.612606	7.92497	-3.9952	0.000358297	0.00318769	-0.116031
NFIL3	-0.748227	7.30551	-3.99509	0.000358398	0.00318769	-0.116302
TP53I11	-0.411658	5.20209	-3.99475	0.000358745	0.00318769	-0.117225
MRPL53	0.526279	7.3969	3.99474	0.000358754	0.00318769	-0.117248
PIN1	0.386267	8.55303	3.99251	0.000361001	0.00320567	-0.123211
INVS	0.431478	5.33041	3.98989	0.000363668	0.00322735	-0.13024
CLEC4D	-0.859252	5.37526	-3.98781	0.000365784	0.00324413	-0.135779
ARPC1A	0.363764	7.91998	3.98575	0.000367904	0.00326092	-0.141299
DDIT3	-0.651586	6.1562	-3.98469	0.000369002	0.00326863	-0.144142
ATP11C	0.354813	5.54634	3.98433	0.000369373	0.0032699	-0.145104
EHD1	-0.754102	9.13322	-3.98229	0.000371488	0.00328547	-0.150554
BIRC2	-0.551032	8.50411	-3.98219	0.000371591	0.00328547	-0.150818
SOS2	-0.41382	6.41524	-3.98161	0.000372193	0.00328863	-0.152364
RSBN1L	0.5423	5.771	3.98141	0.000372406	0.00328863	-0.15291
EIF1B	-0.632027	7.98133	-3.9811	0.000372722	0.0032894	-0.153721
ITGB1BP1	0.378611	6.48009	3.97924	0.000374677	0.00330462	-0.158714
ZBED5	-0.313044	6.29029	-3.97879	0.000375145	0.00330672	-0.159907
CSNK2A1	0.530874	7.42249	3.97823	0.000375733	0.00330986	-0.161401
WDR55	0.372661	6.53245	3.9776	0.000376399	0.0033137	-0.163093
TPR	0.533991	8.07929	3.9756	0.000378506	0.0033302	-0.168421
ABCD2	0.620931	4.52035	3.97459	0.000379579	0.0033376	-0.171124
KIF13B	0.506612	6.33714	3.9743	0.00037989	0.00333828	-0.171905
TXN2	0.409907	5.63943	3.9734	0.000380844	0.00334462	-0.1743
GTF2A2	0.432967	7.35038	3.97232	0.000381999	0.00335272	-0.177191
LGALS3BP	0.631305	6.64274	3.97186	0.000382499	0.00335505	-0.178439
DLAT	0.523373	6.09831	3.9715	0.000382876	0.00335594	-0.179379
DBI	0.398382	8.38828	3.97132	0.000383068	0.00335594	-0.179858
DNAJC8	0.395371	8.42612	3.97061	0.000383837	0.0033594	-0.181772
TEX264	0.302732	6.73137	3.97052	0.000383932	0.0033594	-0.182007
UBE4A	0.446373	8.13404	3.97007	0.000384415	0.00336159	-0.183209
YWHAB	0.40884	9.47985	3.96769	0.000386982	0.00338196	-0.18956
ABTB1	-0.400289	7.2223	-3.96649	0.000388286	0.00339054	-0.192771
TRRAP	0.455446	7.93118	3.96635	0.000388435	0.00339054	-0.193138
APOBEC3G	1.06151	7.79483	3.96538	0.000389492	0.00339769	-0.19573
C1orf123	0.362632	7.87809	3.96434	0.000390632	0.00340557	-0.19852
TSEN54	0.469499	6.52493	3.96386	0.000391147	0.00340799	-0.199778
COPS4	0.412325	6.31661	3.96272	0.000392396	0.0034168	-0.202821
RANBP9	0.392179	7.1561	3.96109	0.000394197	0.00342939	-0.207191
TRAF4	-0.593017	5.47438	-3.96098	0.00039432	0.00342939	-0.207489
HERPUD1	-1.00395	8.73712	-3.96005	0.000395337	0.00343502	-0.209947
HIST1H3F	1.29512	6.91836	3.95981	0.000395605	0.00343502	-0.210593
TMEM183B	0.466038	8.45775	3.95974	0.000395686	0.00343502	-0.210788
APEX2	0.506875	5.93039	3.95696	0.000398769	0.0034597	-0.218195
AK2	0.400023	6.30958	3.95626	0.000399558	0.00346445	-0.220081
SLC25A12	0.419678	5.40634	3.95567	0.000400213	0.00346803	-0.221644
CYSLTR1	-0.621414	5.54835	-3.95471	0.000401289	0.00347375	-0.224207
PSMD5	0.30847	6.17774	3.95465	0.000401357	0.00347375	-0.224369
NARS	0.43256	8.68724	3.95389	0.000402205	0.00347899	-0.226382
MSN	0.488122	11.2461	3.95339	0.000402776	0.00348183	-0.227735
LARP1	0.430989	7.20146	3.9505	0.000406039	0.00350792	-0.235435
FLII	0.64139	7.5213	3.94974	0.000406898	0.00351323	-0.23745
EIF4E3	0.480301	8.60132	3.94928	0.000407425	0.00351446	-0.238685
NFATC3	0.553761	7.0162	3.94919	0.00040753	0.00351446	-0.238932
BNIP3L	-0.426567	7.58673	-3.94861	0.00040819	0.00351804	-0.240476
SCML1	-0.633866	4.92378	-3.94619	0.000410962	0.0035398	-0.246934
PIGA	-0.727847	6.93937	-3.94532	0.000411958	0.00354625	-0.249242
ACTG1	0.44901	12.655	3.94469	0.000412681	0.00354917	-0.250915
NBR1	0.461906	5.11261	3.9446	0.000412792	0.00354917	-0.251172
RAB21	-0.693501	8.04024	-3.94346	0.00041411	0.00355486	-0.254214
FCGR1B	1.09679	6.98962	3.94342	0.000414155	0.00355486	-0.254316
TFE3	-0.442022	6.02506	-3.94338	0.000414197	0.00355486	-0.254413
ZNF136	-0.360925	5.14704	-3.94287	0.00041479	0.00355761	-0.255777
RBM10	0.442185	7.68251	3.94268	0.000415013	0.00355761	-0.25629
CARS	0.355783	6.32216	3.94232	0.000415426	0.00355902	-0.257239
TLE1	-0.491755	5.27297	-3.94065	0.000417368	0.00357353	-0.261688
SRP68	0.475619	7.89838	3.93989	0.000418259	0.00357802	-0.263722
CACYBP	0.622304	6.12928	3.93977	0.000418392	0.00357802	-0.264026
TRUB2	0.414249	5.32631	3.93627	0.000422502	0.00361102	-0.273351
CANX	0.575491	9.46415	3.93177	0.00042785	0.00365456	-0.285349
TNFAIP3	-0.777451	10.8656	-3.93125	0.000428466	0.00365763	-0.28672
HSPBAP1	-0.307904	5.5469	-3.92597	0.000434826	0.00370882	-0.300774
RALY	0.465209	8.53495	3.92577	0.000435068	0.00370882	-0.301303
CCL7	-1.03947	4.60483	-3.92563	0.000435237	0.00370882	-0.301674
SLC7A6OS	0.391921	6.30646	3.92521	0.000435757	0.00371104	-0.302812
CCND3	0.369535	9.38366	3.92478	0.000436277	0.00371327	-0.30395
MX2	-0.792359	7.75955	-3.92455	0.000436555	0.00371343	-0.304557
DARS	0.380914	8.48672	3.92337	0.000438	0.00372352	-0.30771
NFE2L2	-0.744683	8.11136	-3.92053	0.000441474	0.00374877	-0.315241
ZMYND11	0.379588	5.43816	3.92052	0.000441493	0.00374877	-0.315283
SLC36A4	-0.452375	5.54796	-3.91837	0.00044415	0.0037691	-0.321004
SIGLEC10	-0.690875	7.27944	-3.91734	0.000445426	0.0037777	-0.323741
ACACB	-0.40419	5.08094	-3.91635	0.000446656	0.00378589	-0.326368
CD84	0.577336	5.2615	3.9157	0.000447464	0.00378882	-0.328093
OSBPL7	0.617267	6.63045	3.91557	0.000447625	0.00378882	-0.328436
ACSM3	-0.327093	4.35995	-3.91544	0.000447793	0.00378882	-0.328794
BTAF1	-0.467112	7.95708	-3.91401	0.000449578	0.00380168	-0.332586
FASLG	0.712162	5.00744	3.91375	0.000449909	0.00380223	-0.333288
METAP2	0.46556	8.40293	3.91279	0.000451117	0.00380983	-0.335844
NRD1	0.563313	8.4475	3.91261	0.000451339	0.00380983	-0.336314
PCCB	0.519891	7.05576	3.91204	0.000452053	0.00381362	-0.337821
ZNF274	-0.396051	6.06393	-3.91119	0.000453127	0.00381657	-0.340082
CDC26	0.303377	6.91799	3.91108	0.000453265	0.00381657	-0.340373
FBXL20	0.415867	5.62199	3.91107	0.00045328	0.00381657	-0.340404
BCL3	-0.810913	7.20608	-3.91092	0.000453467	0.00381657	-0.340798
GOPC	0.408929	6.02645	3.9105	0.000454005	0.00381886	-0.341928
NEK6	-0.383014	5.89222	-3.90956	0.000455196	0.00382335	-0.344425
KLHL5	-0.409621	6.3591	-3.90947	0.000455302	0.00382335	-0.344648
TSPAN3	-0.60857	6.77291	-3.90945	0.000455338	0.00382335	-0.344723
UBA2	0.478844	6.60447	3.90824	0.000456868	0.00383395	-0.34792
LYPLA2	0.583588	6.53672	3.90781	0.000457419	0.00383429	-0.349069
PSMA6	0.471081	9.7727	3.9077	0.000457554	0.00383429	-0.349351
UBL3	-0.42933	8.53697	-3.90758	0.00045771	0.00383429	-0.349676
EPM2AIP1	-0.363099	5.80714	-3.90712	0.000458297	0.00383697	-0.350899
SMURF1	-0.435782	5.6859	-3.90599	0.000459744	0.00384683	-0.353902
SPTLC2	0.647142	6.57284	3.90532	0.000460607	0.00385181	-0.35569
FNTA	0.551625	7.68854	3.90507	0.000460928	0.00385226	-0.356355
IRAK4	0.70902	6.57823	3.90202	0.00046486	0.00388285	-0.364451
GYS1	0.510451	6.01193	3.90168	0.000465303	0.0038843	-0.365361
ASB8	0.447645	7.41987	3.90095	0.000466251	0.00388994	-0.367299
HOOK1	-0.455802	4.51977	-3.8973	0.000471009	0.00392736	-0.376977
PPBP	-1.16096	8.10297	-3.89516	0.000473828	0.00394718	-0.382663
HDAC3	0.489559	6.72847	3.89508	0.000473937	0.00394718	-0.382884
IL12RB2	0.609287	5.10094	3.89397	0.000475405	0.00395711	-0.38583
C14orf142	0.497577	5.6726	3.89359	0.000475897	0.00395824	-0.386816
GARS	0.57058	8.38501	3.89345	0.000476093	0.00395824	-0.387208
KLF5	-0.43527	5.00753	-3.89265	0.000477153	0.00396441	-0.389328
TFCP2	0.436975	6.77351	3.89247	0.000477387	0.00396441	-0.389795
ARL5B	-0.771778	6.45683	-3.89138	0.000478845	0.00397422	-0.392702
STX8	0.504283	7.72676	3.89097	0.000479383	0.00397638	-0.393771
TRAF7	0.530585	5.99352	3.89039	0.000480164	0.00398057	-0.395323
LMBRD2	0.322664	4.36686	3.88779	0.000483647	0.00400712	-0.40221
LIX1L	0.358616	6.68508	3.88577	0.000486372	0.00402737	-0.407563
WSB1	-0.474229	7.88943	-3.88409	0.000488661	0.00404399	-0.412037
ARHGAP5	-0.329897	4.52561	-3.88358	0.000489357	0.00404742	-0.413394
EPSTI1	0.770878	8.88144	3.88117	0.000492643	0.00407225	-0.41977
KDELR2	0.501842	7.3445	3.88084	0.000493095	0.00407364	-0.420643
MAML3	-0.413453	4.97434	-3.88011	0.000494103	0.00407956	-0.422589
NDUFA1	0.510123	9.03091	3.87991	0.00049438	0.00407956	-0.423123
WDR74	-0.371689	7.1288	-3.87945	0.000495006	0.00408238	-0.42433
GSK3A	0.383696	6.17552	3.87892	0.000495739	0.00408608	-0.42574
AHCYL1	0.50711	7.9757	3.87843	0.000496406	0.00408861	-0.42702
RIPK2	-0.846219	8.27761	-3.87828	0.000496616	0.00408861	-0.427424
STRA13	0.456557	7.61719	3.87762	0.000497528	0.00409377	-0.429171
TMSB10	0.335399	11.8424	3.87648	0.000499107	0.0041044	-0.432189
CHD6	-0.378833	5.93308	-3.87594	0.000499864	0.00410631	-0.433634
CASP7	0.461622	6.07388	3.87591	0.000499911	0.00410631	-0.433723
TBX21	0.572185	6.13147	3.87305	0.000503894	0.00413666	-0.441283
PRDM2	-0.331604	5.54047	-3.87204	0.000505314	0.00414595	-0.443964
NEK2	1.02298	4.60811	3.87174	0.000505738	0.00414705	-0.444762
CD96	0.542632	8.81537	3.87029	0.000507777	0.00416139	-0.448594
DNAJC15	0.52406	7.17561	3.86923	0.000509277	0.00417131	-0.451405
BCL9	-0.438112	5.84034	-3.86858	0.000510195	0.00417644	-0.453119
C21orf2	-0.379862	6.6535	-3.86644	0.000513239	0.00419798	-0.458785
ACTN4	0.743792	8.98063	3.86628	0.000513478	0.00419798	-0.45923
EIF2S1	0.428839	6.04119	3.86612	0.000513704	0.00419798	-0.459649
CD52	0.995324	10.0595	3.86511	0.000515148	0.00420739	-0.462322
SSBP4	0.718076	7.53891	3.86124	0.00052072	0.00425048	-0.472568
PTPRC	0.727761	9.00531	3.86016	0.00052228	0.00426078	-0.475416
FARSB	0.464129	5.24806	3.85777	0.000525762	0.00428675	-0.481744
LIN7A	-0.440696	4.28895	-3.85665	0.000527401	0.00429767	-0.484707
H2AFV	0.381187	6.56793	3.85633	0.000527863	0.00429899	-0.485541
PPIF	-0.925092	6.98577	-3.8559	0.000528493	0.00430035	-0.486677
AP2A1	0.446424	6.01259	3.85581	0.000528629	0.00430035	-0.486923
BCL11A	-0.729528	5.59927	-3.85439	0.000530715	0.00431488	-0.490673
FRY	-0.485526	4.70131	-3.85124	0.000535377	0.00435031	-0.499
ZXDA	-0.33096	4.87478	-3.84974	0.000537612	0.00436601	-0.502967
TERF1	0.39576	5.56588	3.84909	0.000538592	0.00437149	-0.504701
SPC24	0.923617	5.96814	3.84787	0.000540406	0.00438374	-0.507903
ZSWIM1	-0.489227	6.5848	-3.84725	0.000541343	0.00438684	-0.509551
LY6E	0.819687	8.99521	3.84721	0.0005414	0.00438684	-0.509651
MLX	0.440423	5.99333	3.84564	0.000543772	0.00440357	-0.513814
RPS6KA1	0.564559	7.5094	3.84482	0.000545001	0.00441104	-0.515963
ACBD5	0.353686	5.4388	3.84418	0.000545973	0.00441641	-0.517659
PRKD3	-0.354307	5.30886	-3.84242	0.000548654	0.0044356	-0.522322
PPP5C	0.437928	5.92261	3.84178	0.000549619	0.00443966	-0.523995
SLPI	-0.575427	4.51784	-3.84168	0.000549775	0.00443966	-0.524266
EPB41	0.417078	6.75509	3.84124	0.000550451	0.00444261	-0.525435
PPP1R3B	-0.357684	5.04712	-3.84062	0.000551396	0.00444774	-0.527068
PREB	0.476189	6.32763	3.84007	0.000552245	0.00445208	-0.528532
ANKFY1	0.345296	6.63424	3.8383	0.00055496	0.00447146	-0.533201
PIK3CG	0.417322	8.06835	3.83788	0.000555611	0.0044742	-0.534317
DLL1	-0.494725	5.10527	-3.83705	0.000556893	0.00448	-0.53651
ADARB1	-0.376217	5.61496	-3.837	0.000556957	0.00448	-0.53662
DRG2	0.470961	6.90635	3.8341	0.000561455	0.00451366	-0.544277
ADRM1	0.459788	7.82641	3.83339	0.000562566	0.00452006	-0.546158
FSCN1	-0.366179	6.23713	-3.83296	0.000563246	0.00452104	-0.547306
MNAT1	0.395892	4.67742	3.83291	0.000563318	0.00452104	-0.547429
HIST1H2AK	0.413758	4.54762	3.83263	0.000563751	0.00452198	-0.54816
C21orf59	0.368987	5.81125	3.83051	0.000567074	0.0045461	-0.553754
PPP1R15B	-0.561064	7.17846	-3.82947	0.000568712	0.00455668	-0.556499
NBPF10	-0.532828	9.95094	-3.82719	0.000572324	0.00458306	-0.562524
BLOC1S1	0.444238	7.71342	3.82402	0.000577371	0.0046209	-0.570878
EMP1	-0.576201	4.8538	-3.8236	0.000578047	0.00462191	-0.571992
TFPT	0.442569	6.62375	3.8234	0.000578363	0.00462191	-0.572512
UBE2C	1.10641	5.74421	3.82334	0.000578463	0.00462191	-0.572677
WDFY3	-0.572708	4.62027	-3.82232	0.000580095	0.00463237	-0.575358
PI4K2B	0.411896	5.07428	3.81984	0.000584107	0.00466181	-0.581915
SKI	-0.660762	6.556	-3.81816	0.000586828	0.00468092	-0.586337
CCL2	-1.77974	6.48086	-3.81464	0.000592583	0.00472199	-0.595621
RPN1	0.536613	9.00037	3.81452	0.000592766	0.00472199	-0.595915
RAP2A	0.602651	6.74501	3.8144	0.000592964	0.00472199	-0.596233
RALGDS	-0.51672	8.61554	-3.8125	0.000596091	0.00474426	-0.601237
EMR1	-0.676439	5.57315	-3.81171	0.000597401	0.00475182	-0.603325
BLNK	-0.341968	4.72494	-3.81153	0.000597703	0.00475182	-0.603806
FOSL1	-0.390879	5.0671	-3.8086	0.000602565	0.00478538	-0.611513
CHST7	-0.527905	6.54082	-3.80859	0.000602591	0.00478538	-0.611554
KHDRBS1	0.458027	9.27888	3.80817	0.00060329	0.00478828	-0.612657
ZYG11B	-0.565217	6.74151	-3.80626	0.000606483	0.00481096	-0.617677
NR1D1	-0.409899	4.85775	-3.80557	0.000607637	0.00481746	-0.619486
CHSY1	-0.453149	7.93015	-3.80473	0.000609057	0.00482605	-0.621706
PSENEN	0.500459	7.24837	3.80306	0.000611873	0.00484495	-0.626094
TUFM	0.602892	8.32062	3.80292	0.000612118	0.00484495	-0.626474
VANGL1	0.386973	4.74718	3.80239	0.000613018	0.0048494	-0.627871
ACTR8	0.394727	5.23904	3.80009	0.000616923	0.0048776	-0.633911
PPP2R5A	0.344533	7.66456	3.79911	0.000618597	0.00488814	-0.636487
SMARCA5	0.402207	7.38886	3.79694	0.000622322	0.00491487	-0.642197
SYT11	0.438513	7.05213	3.79461	0.000626355	0.004944	-0.648341
KLHL2	-0.343762	5.75589	-3.79331	0.000628611	0.00495908	-0.651758
CYLD	-0.54131	7.62021	-3.79288	0.000629365	0.0049623	-0.652899
ATP2A3	0.541295	7.6475	3.79267	0.00062972	0.00496237	-0.653434
MRPL47	0.442213	6.23802	3.79077	0.000633032	0.00498574	-0.658423
DMXL2	-0.841232	6.33155	-3.78993	0.000634512	0.00499289	-0.660643
MANSC1	-0.379356	4.15369	-3.78973	0.000634855	0.00499289	-0.661157
SCO1	0.47566	6.81264	3.78966	0.000634984	0.00499289	-0.661351
GPR137B	-0.389593	5.83963	-3.78797	0.000637955	0.0050135	-0.665789
NRP2	-0.410874	4.37508	-3.78705	0.000639592	0.00502362	-0.668225
TOX	0.636218	6.87274	3.7842	0.000644638	0.00506048	-0.675696
C3orf58	0.387414	6.01218	3.78367	0.000645594	0.00506521	-0.677104
TSPYL2	-0.637369	6.51153	-3.78134	0.00064976	0.00509511	-0.683219
DDX41	0.37368	6.82151	3.78055	0.000651176	0.00510342	-0.685289
MCM8	0.707221	7.06761	3.77861	0.000654676	0.00512806	-0.690385
PTPRCAP	0.569254	9.05277	3.77797	0.000655838	0.00513436	-0.69207
AP2S1	0.424764	9.38374	3.77614	0.000659164	0.00515758	-0.696879
COPS3	0.500574	8.31889	3.77576	0.000659847	0.00516011	-0.697863
KIAA0586	0.363678	5.31677	3.77536	0.000660587	0.00516309	-0.698929
RPUSD3	0.392909	7.12923	3.77457	0.000662026	0.00517152	-0.700997
HSPA1A	-0.522734	8.22154	-3.77204	0.00066666	0.00520397	-0.707627
MTX2	0.365391	5.6296	3.77191	0.000666906	0.00520397	-0.707977
MYL6	0.364882	9.98366	3.77061	0.000669293	0.00521976	-0.711373
UBLCP1	0.388055	7.23934	3.76757	0.000674934	0.00526089	-0.719349
MAZ	0.408418	5.49267	3.76669	0.000676583	0.00526806	-0.721669
DDX11	0.381389	5.21792	3.76669	0.000676588	0.00526806	-0.721675
MRPS14	0.367862	5.0036	3.76447	0.00068075	0.00529759	-0.727503
PSMA1	0.418484	8.26247	3.7631	0.000683327	0.00531477	-0.731093
ZNF721	-0.354586	6.16668	-3.7623	0.000684824	0.00532352	-0.733172
LOC729603	-0.327198	8.27767	-3.76054	0.000688169	0.00534663	-0.737803
ZNF682	-0.37696	5.94944	-3.76	0.00068918	0.00535159	-0.739197
COPE	0.707541	8.98525	3.75917	0.000690775	0.00536027	-0.741393
EGR1	-0.977084	9.39802	-3.75903	0.000691045	0.00536027	-0.741765
JAG1	-0.331261	4.64861	-3.75842	0.000692201	0.00536634	-0.743354
NSF	0.453042	7.57775	3.75216	0.00070426	0.00545463	-0.759762
SLC22A4	-0.549469	5.15295	-3.75211	0.00070435	0.00545463	-0.759883
GSTK1	0.434383	9.25102	3.75144	0.000705657	0.0054618	-0.761644
BCCIP	0.453355	6.46968	3.75121	0.000706093	0.00546223	-0.762231
EPHB1	-0.411753	4.48321	-3.74768	0.00071301	0.0055104	-0.771491
JUNB	-0.996769	9.49755	-3.74764	0.000713087	0.0055104	-0.771594
MYCBP	0.31393	4.60376	3.74681	0.000714715	0.00551728	-0.77376
ZNF189	-0.299298	4.81253	-3.74679	0.000714748	0.00551728	-0.773803
LRRC56	-0.277204	5.73996	-3.74606	0.000716203	0.00552555	-0.775736
ZNF608	-0.349701	4.2598	-3.74482	0.000718643	0.00553901	-0.778965
MYO1G	0.485455	9.16644	3.74478	0.00071872	0.00553901	-0.779068
SF1	-0.396831	7.62915	-3.74293	0.000722398	0.00556437	-0.783916
GFM2	0.355271	4.58226	3.74251	0.000723228	0.00556777	-0.785006
KIF21B	0.450966	6.77521	3.74116	0.000725924	0.00558553	-0.78854
GTF3C1	0.699221	6.98327	3.74091	0.000726437	0.00558648	-0.789211
SH3KBP1	0.418905	8.89636	3.7405	0.00072726	0.00558913	-0.790286
ADD3	0.47558	8.43718	3.74034	0.000727561	0.00558913	-0.790679
COPG2	0.480274	5.51432	3.73928	0.000729708	0.00559973	-0.793477
SHMT1	0.468764	5.42388	3.73927	0.000729721	0.00559973	-0.793494
MRPL13	0.48088	5.85139	3.73714	0.000734016	0.00562823	-0.799067
CAB39	0.445639	8.69405	3.73704	0.000734219	0.00562823	-0.79933
PTPN7	0.60312	6.45909	3.73557	0.000737191	0.00564799	-0.803166
UGDH	0.324733	5.86103	3.73489	0.000738568	0.00565552	-0.804938
LILRB4	-0.615742	5.96774	-3.73432	0.000739724	0.00566136	-0.806424
NR2C2	0.518905	6.43629	3.73395	0.000740478	0.00566411	-0.807391
HMBS	0.419896	5.41113	3.73344	0.000741527	0.0056691	-0.808735
XCL1	-0.438899	4.61774	-3.73214	0.000744188	0.00568642	-0.812136
TNPO3	0.574517	7.40002	3.73124	0.000746034	0.00569749	-0.814488
TACC3	0.40495	6.86714	3.72942	0.000749784	0.00572297	-0.819249
MME	-0.640506	4.59777	-3.72908	0.000750482	0.00572297	-0.820133
ZCCHC17	0.536069	7.11837	3.72904	0.000750567	0.00572297	-0.82024
RNF157	0.513223	5.3532	3.7281	0.000752505	0.00573343	-0.822689
CACHD1	-0.292163	4.26252	-3.72799	0.000752737	0.00573343	-0.822981
CHRNE	-0.478309	4.94677	-3.72763	0.000753481	0.00573605	-0.823919
ZBTB2	0.25699	6.6661	3.72592	0.000757043	0.00576011	-0.828397
FBXO11	-0.290879	7.2852	-3.72537	0.000758189	0.00576577	-0.829833
GADD45A	-0.538389	6.92263	-3.72414	0.000760749	0.00578217	-0.833033
ITGA1	0.427894	3.9804	3.72292	0.00076331	0.00579607	-0.836224
E2F4	0.46336	8.01793	3.72288	0.000763385	0.00579607	-0.836317
PER2	-0.454345	6.15141	-3.72259	0.000763999	0.00579767	-0.83708
SDHC	0.478155	6.69855	3.72203	0.000765182	0.00580357	-0.838549
KCNJ15	-0.675235	5.01312	-3.72181	0.000765636	0.00580395	-0.839112
KCNJ2	-1.01077	5.74892	-3.71818	0.00077333	0.00585888	-0.848603
TRIP10	-0.461889	4.99097	-3.71801	0.000773699	0.00585888	-0.849055
CLCF1	-0.445509	5.81844	-3.71766	0.000774424	0.00586127	-0.849944
RPS6KA3	0.477546	6.87976	3.71671	0.000776463	0.00587361	-0.852441
JARID2	-0.596269	8.1867	-3.71651	0.000776891	0.00587376	-0.852964
RNF141	-0.467812	5.85104	-3.71376	0.000782772	0.0059151	-0.860121
AKR7A2	0.360488	7.6658	3.71301	0.000784404	0.00592432	-0.862099
UCK2	0.592546	5.56176	3.71222	0.000786111	0.00593318	-0.864161
MTMR12	0.451685	6.21329	3.71208	0.000786404	0.00593318	-0.864515
ITPA	0.3841	6.56292	3.71135	0.000787995	0.00594137	-0.866433
USP6NL	-0.460151	5.55232	-3.71104	0.000788648	0.00594137	-0.867219
SLC30A9	0.37967	7.01351	3.711	0.000788733	0.00594137	-0.867321
SDK2	-0.339552	4.78747	-3.70962	0.000791742	0.00596091	-0.870935
GCA	-0.755444	7.55933	-3.70768	0.000795981	0.00598969	-0.876003
CEP57	0.340883	5.95089	3.70656	0.000798425	0.0060037	-0.878911
SRPK2	0.475418	6.19262	3.70644	0.000798681	0.0060037	-0.879215
SARS	0.449539	6.79033	3.70587	0.000799945	0.00601006	-0.880717
HIP1	-0.41948	4.90109	-3.70406	0.000803924	0.00603679	-0.885424
PRDM4	-0.364897	7.62134	-3.7034	0.000805388	0.00604462	-0.88715
LARP4	0.351815	5.48852	3.70222	0.000807996	0.00606102	-0.890218
SH3BP1	0.512626	7.34342	3.70097	0.000810781	0.00607874	-0.893483
ST6GALNAC2	-0.557635	4.97996	-3.69951	0.000814047	0.00610004	-0.897297
PTTG1	1.08512	6.0953	3.6993	0.000814515	0.00610036	-0.897842
MAP1LC3B	-0.525898	8.66072	-3.69856	0.00081616	0.00610949	-0.899756
CHMP4B	-0.566506	8.74033	-3.69836	0.000816615	0.00610971	-0.900286
FURIN	-0.719506	6.83864	-3.69751	0.000818526	0.00612082	-0.902503
KTN1	0.479888	7.20482	3.697	0.000819674	0.00612621	-0.903833
DNASE2	0.408316	7.8331	3.69655	0.000820685	0.00613058	-0.905002
DYNC1I2	0.537767	6.48825	3.69521	0.000823693	0.00614984	-0.908472
NONO	0.456076	9.87771	3.69445	0.000825419	0.00615952	-0.910458
LIMK2	-0.766106	5.9026	-3.69352	0.000827525	0.00617203	-0.912875
C6orf48	-0.366378	8.05135	-3.69136	0.00083246	0.00620561	-0.918516
RER1	0.382917	5.91548	3.69085	0.000833614	0.00621099	-0.91983
CYP4F2	-0.314304	4.17679	-3.69045	0.000834532	0.0062146	-0.920874
SDCBP	-0.739192	9.39656	-3.68875	0.000838436	0.00624044	-0.925301
CCDC28B	0.654222	5.51997	3.68465	0.00084792	0.00630775	-0.935969
CTBS	-0.550118	7.43846	-3.68375	0.000850024	0.00631997	-0.938319
TTC21A	-0.308612	4.38364	-3.68357	0.000850443	0.00631997	-0.938786
SLC35B1	0.501733	7.65806	3.68316	0.000851395	0.00632377	-0.939848
AGGF1	0.456233	7.01096	3.68269	0.000852499	0.00632869	-0.941076
WBP2	-0.501333	9.055	-3.67806	0.000863369	0.00640607	-0.953091
MYO1F	0.594722	8.50509	3.67715	0.000865544	0.00641889	-0.955477
PSAP	-0.446421	11.4123	-3.67555	0.000869344	0.0064393	-0.959631
ID3	-0.545451	4.99329	-3.67548	0.000869511	0.0064393	-0.959813
MVD	0.479365	6.07214	3.67542	0.000869642	0.0064393	-0.959956
CNN3	-0.323721	4.30305	-3.67517	0.000870245	0.00644044	-0.960613
CDC5L	0.374498	7.18457	3.67484	0.000871041	0.00644301	-0.961479
ELL	-0.525739	7.01164	-3.67419	0.000872582	0.00644895	-0.963156
TCF7	-0.364076	6.04131	-3.67412	0.000872743	0.00644895	-0.963331
UBE2D1	-0.592157	6.06634	-3.67297	0.0008755	0.006466	-0.966322
MRPL48	0.399038	5.78312	3.67139	0.000879302	0.00649073	-0.970429
APBB3	-0.315165	6.34571	-3.67109	0.000880028	0.00649275	-0.971212
RORA	0.621309	7.11321	3.6703	0.00088193	0.00650344	-0.973259
PPIH	0.554348	6.62092	3.67008	0.000882478	0.00650414	-0.973848
YTHDC1	-0.371748	8.36117	-3.66864	0.000885967	0.00652651	-0.977589
PARP10	0.318959	7.02735	3.66767	0.000888313	0.00654043	-0.980096
DHX15	0.459431	8.86769	3.66575	0.000893007	0.00657161	-0.985091
TMEM97	0.609518	5.88887	3.66551	0.000893596	0.00657258	-0.985716
NF1	0.375331	5.25852	3.66485	0.000895203	0.00658103	-0.98742
ZNF460	-0.456245	6.09539	-3.66115	0.000904324	0.00664468	-0.997029
TLE3	-0.670144	6.91274	-3.66012	0.000906858	0.00665942	-0.999681
DEDD2	-0.311341	8.49755	-3.65996	0.000907259	0.00665942	-1.0001
LETM1	0.337864	5.77142	3.65893	0.000909832	0.00667489	-1.00278
NOMO3	0.523906	6.78982	3.65844	0.000911042	0.00668035	-1.00404
MAP4	0.369754	5.52758	3.658	0.000912138	0.00668497	-1.00518
CHMP1B	-0.529038	7.5449	-3.65477	0.000920256	0.00674103	-1.01358
PAFAH1B3	0.392294	6.71622	3.6542	0.000921675	0.00674623	-1.01504
COASY	0.321337	6.83498	3.65411	0.000921906	0.00674623	-1.01528
BIN2	0.560177	8.19766	3.65379	0.000922724	0.00674878	-1.01612
PDE8A	-0.31668	4.91162	-3.6533	0.000923963	0.00675439	-1.01739
FCGR2A	-0.848498	7.50186	-3.65274	0.000925378	0.00676129	-1.01884
CNOT6	0.440177	7.01235	3.65172	0.000927942	0.00677657	-1.02146
GTF2H3	0.504412	5.29726	3.65044	0.000931204	0.00679694	-1.02479
AP1G2	0.543461	7.35651	3.64949	0.000933637	0.00681123	-1.02726
MTMR9	-0.338589	6.10231	-3.64875	0.000935536	0.00682161	-1.02918
RASGRP3	-0.525071	5.55955	-3.64821	0.000936916	0.00682821	-1.03058
FPR1	-1.29579	8.52645	-3.64771	0.000938198	0.00683112	-1.03188
CKAP4	-0.603839	7.61477	-3.64768	0.000938268	0.00683112	-1.03195
SLC24A6	-0.374299	7.00807	-3.64701	0.000939974	0.00684008	-1.03367
ZNF350	-0.354389	6.08542	-3.64582	0.000943045	0.00685894	-1.03676
SCNN1D	-0.292957	5.65131	-3.64431	0.000946953	0.00688388	-1.04068
C12orf49	0.500878	6.63549	3.64384	0.000948161	0.00688917	-1.04189
APP	-0.713525	6.41553	-3.64085	0.000955938	0.00694014	-1.04962
ANAPC4	0.342923	6.40413	3.64078	0.000956143	0.00694014	-1.04983
FAM101B	-0.76588	7.08416	-3.6399	0.000958443	0.00695332	-1.0521
TLR10	-0.501054	4.55259	-3.63937	0.000959816	0.00695756	-1.05346
HIST2H2AC	0.541643	10.14	3.63902	0.000960746	0.00695756	-1.05438
XRCC1	0.443344	7.16874	3.63897	0.000960878	0.00695756	-1.05451
DERL2	0.380525	7.26096	3.63893	0.000960968	0.00695756	-1.0546
FCER1G	-0.745953	10.3769	-3.63795	0.000963564	0.00697284	-1.05715
RCOR1	-0.441225	5.45517	-3.63667	0.000966919	0.00699132	-1.06044
BOP1	0.392843	7.58213	3.63635	0.000967763	0.00699132	-1.06127
LAX1	0.615738	6.82404	3.63631	0.00096788	0.00699132	-1.06138
TXNL1	0.310215	6.21998	3.63618	0.000968219	0.00699132	-1.06172
HELZ	0.540596	7.85186	3.63606	0.000968554	0.00699132	-1.06204
MRPL22	0.423525	6.48721	3.6354	0.000970282	0.00700028	-1.06373
HABP4	-0.318018	5.76512	-3.63515	0.000970948	0.00700156	-1.06438
PMP22	-0.281562	4.361	-3.63407	0.000973816	0.00701871	-1.06718
KIAA1967	0.400206	6.62455	3.63166	0.000980242	0.00706148	-1.07341
LAP3	0.702536	7.95543	3.63038	0.000983683	0.00708271	-1.07672
STK38L	-0.281096	5.37827	-3.62985	0.000985107	0.00708941	-1.07809
NIP7	0.518309	7.67407	3.62929	0.000986618	0.00709544	-1.07955
SEC61A1	0.400208	9.21578	3.62917	0.000986933	0.00709544	-1.07985
ACVR1B	-0.3553	5.19088	-3.62862	0.00098841	0.00710249	-1.08126
RAPGEF6	-0.454498	7.66848	-3.62776	0.000990734	0.00711564	-1.08349
[truncated: 12,352 more rows]

## Sheet: S2 Table 
Supplementary Table S2. Genes included in the four selected co-expression modules identified by WGCNA (Cyan, Tan, Pink, and Green Modules)
Gene symbol	Dynamic Mods	Module Labels
AAAS	magenta	greenyellow
AARS	blue	greenyellow
AASDHPPT	brown	greenyellow
AATF	red	greenyellow
ABCA1	purple	tan
ABCB10	blue	greenyellow
ABCB9	grey	grey
ABCC3	midnightblue	pink
ABCD1	salmon	black
ABCD2	magenta	greenyellow
ABCE1	cyan	cyan
ABCF2	red	greenyellow
ABCG1	turquoise	tan
ABHD3	salmon	black
ABI3	blue	greenyellow
ABLIM3	midnightblue	pink
ABT1	black	black
ABTB2	turquoise	tan
ACAA1	black	black
ACAA2	blue	greenyellow
ACAT1	brown	greenyellow
ACD	blue	greenyellow
ACIN1	blue	greenyellow
ACLY	blue	greenyellow
ACO2	black	black
ACOT4	yellow	cyan
ACOT7	yellow	cyan
ACP1	black	black
ACPP	pink	pink
ACRBP	midnightblue	pink
ACSL1	turquoise	tan
ACSL5	magenta	greenyellow
ACSS2	green	pink
ACTA2	yellow	cyan
ACTG1	greenyellow	greenyellow
ACTL6A	red	greenyellow
ACTN1	purple	tan
ACTN4	magenta	greenyellow
ACTR10	black	black
ACTR2	greenyellow	greenyellow
ACVR2A	purple	tan
ADA	brown	greenyellow
ADAM19	turquoise	tan
ADAM28	turquoise	tan
ADAM7	yellow	cyan
ADAM8	turquoise	tan
ADAT1	black	black
ADCY7	greenyellow	greenyellow
ADD3	greenyellow	greenyellow
ADIPOR1	turquoise	tan
ADIPOR2	greenyellow	greenyellow
ADM	purple	tan
ADORA2A	turquoise	tan
ADPGK	tan	tan
ADRM1	cyan	cyan
ADSL	blue	greenyellow
AES	blue	greenyellow
AFF1	black	black
AFF3	turquoise	tan
AFF4	tan	tan
AFMID	green	pink
AGGF1	greenyellow	greenyellow
AGMAT	red	greenyellow
AGPAT1	blue	greenyellow
AGPAT4	blue	greenyellow
AGPAT5	black	black
AGPS	brown	greenyellow
AGTPBP1	grey	grey
AGTRAP	pink	pink
AHCY	black	black
AHCYL1	magenta	greenyellow
AHR	purple	tan
AHSA1	blue	greenyellow
AIF1	pink	pink
AIFM1	brown	greenyellow
AIP	blue	greenyellow
AK3	brown	greenyellow
AKAP8L	black	black
AKNA	blue	greenyellow
AKR1B1	red	greenyellow
AKR1C3	green	pink
ALAS2	brown	greenyellow
ALDH16A1	red	greenyellow
ALDH18A1	brown	greenyellow
ALDH1A1	pink	pink
ALDH2	pink	pink
ALDH3B1	green	pink
ALDOA	black	black
ALG1	red	greenyellow
ALG8	blue	greenyellow
ALKBH7	black	black
ALOX12	midnightblue	pink
ALOX5	pink	pink
ALOX5AP	turquoise	tan
ALPK1	pink	pink
ALPL	turquoise	tan
AMD1	tan	tan
AMDHD2	yellow	cyan
AMFR	tan	tan
AMICA1	pink	pink
AMPD3	turquoise	tan
AMY1A	yellow	cyan
AMZ2	black	black
ANAPC1	red	greenyellow
ANAPC5	blue	greenyellow
ANAPC7	blue	greenyellow
ANG	green	pink
ANKDD1A	turquoise	tan
ANKMY2	brown	greenyellow
ANKRD12	tan	tan
ANKRD20A1	grey	grey
ANKRD22	brown	greenyellow
ANKRD50	green	pink
ANKRD55	green	pink
ANKRD9	midnightblue	pink
ANLN	brown	greenyellow
ANP32B	blue	greenyellow
ANP32E	magenta	greenyellow
ANPEP	purple	tan
ANTXR2	purple	tan
ANXA1	magenta	greenyellow
ANXA2	blue	greenyellow
ANXA2P1	blue	greenyellow
ANXA3	turquoise	tan
ANXA6	magenta	greenyellow
AOAH	magenta	greenyellow
AP1G1	tan	tan
AP1G2	greenyellow	greenyellow
AP1M1	magenta	greenyellow
AP1S1	salmon	black
AP1S2	pink	pink
AP2A1	magenta	greenyellow
AP2A2	greenyellow	greenyellow
AP2B1	greenyellow	greenyellow
AP2M1	red	greenyellow
AP2S1	magenta	greenyellow
AP3D1	greenyellow	greenyellow
AP3M1	red	greenyellow
AP3M2	cyan	cyan
AP3S1	black	black
AP4E1	brown	greenyellow
APBB1IP	magenta	greenyellow
APEH	magenta	greenyellow
APEX1	red	greenyellow
APEX2	yellow	cyan
APH1A	salmon	black
API5	blue	greenyellow
APLP2	turquoise	tan
APOA1BP	red	greenyellow
APOBEC3A	turquoise	tan
APOBEC3B	yellow	cyan
APOBEC3C	blue	greenyellow
APOBEC3D	magenta	greenyellow
APOBEC3F	brown	greenyellow
APOBEC3G	red	greenyellow
APOL3	red	greenyellow
APOL6	salmon	black
APP	pink	pink
APRT	red	greenyellow
AQP10	midnightblue	pink
AQP9	turquoise	tan
ARCN1	black	black
AREG	turquoise	tan
ARF3	black	black
ARF4	turquoise	tan
ARF5	black	black
ARHGAP1	magenta	greenyellow
ARHGAP11A	magenta	greenyellow
ARHGAP15	grey	grey
ARHGAP18	magenta	greenyellow
ARHGAP19	greenyellow	greenyellow
ARHGAP24	pink	pink
ARHGAP25	salmon	black
ARHGAP30	greenyellow	greenyellow
ARHGDIA	blue	greenyellow
ARHGEF1	red	greenyellow
ARHGEF3	brown	greenyellow
ARHGEF6	magenta	greenyellow
ARID1A	red	greenyellow
ARID3A	green	pink
ARID4B	turquoise	tan
ARID5A	turquoise	tan
ARID5B	black	black
ARL4C	black	black
ARL5B	turquoise	tan
ARMC1	blue	greenyellow
ARMCX6	black	black
ARPC1B	red	greenyellow
ARPC3	black	black
ARPC4	black	black
ARPC5L	yellow	cyan
ARRB1	pink	pink
ARRB2	black	black
ARRDC2	turquoise	tan
ARRDC3	tan	tan
ARRDC4	purple	tan
ARSA	grey	grey
ASAH1	pink	pink
ASB13	green	pink
ASB8	blue	greenyellow
ASCC3	magenta	greenyellow
ASF1A	red	greenyellow
ASF1B	yellow	cyan
ASGR1	green	pink
ASGR2	pink	pink
ASH2L	red	greenyellow
ASMTL	salmon	black
ASNA1	magenta	greenyellow
ASNSD1	black	black
ASPHD2	salmon	black
ASPM	brown	greenyellow
ASTL	turquoise	tan
ASXL2	blue	greenyellow
ATAD2	brown	greenyellow
ATAD3A	yellow	cyan
ATF3	purple	tan
ATG16L1	blue	greenyellow
ATG16L2	purple	tan
ATG4B	black	black
ATG9A	blue	greenyellow
ATHL1	tan	tan
ATIC	brown	greenyellow
ATM	greenyellow	greenyellow
ATP13A2	blue	greenyellow
ATP1A1	black	black
ATP1B1	pink	pink
ATP1B3	brown	greenyellow
ATP2A2	brown	greenyellow
ATP2A3	blue	greenyellow
ATP2B1	turquoise	tan
ATP2B4	greenyellow	greenyellow
ATP5A1	blue	greenyellow
ATP5B	blue	greenyellow
ATP5C1	red	greenyellow
ATP5D	black	black
ATP5F1	blue	greenyellow
ATP5G1	blue	greenyellow
ATP5G2	black	black
ATP5H	magenta	greenyellow
ATP5I	blue	greenyellow
ATP5J2	blue	greenyellow
ATP5O	red	greenyellow
ATP6V0A1	pink	pink
ATP6V0A2	blue	greenyellow
ATP6V0B	purple	tan
ATP6V0C	tan	tan
ATP6V0D1	salmon	black
ATP6V1B2	pink	pink
ATP8B2	greenyellow	greenyellow
ATP8B4	pink	pink
ATP9A	midnightblue	pink
ATRX	blue	greenyellow
ATXN1	brown	greenyellow
AUH	red	greenyellow
AURKA	yellow	cyan
AURKB	yellow	cyan
AUTS2	grey	grey
AVPI1	green	pink
AXIN1	red	greenyellow
AXIN2	green	pink
AZIN1	turquoise	tan
B3GNT5	turquoise	tan
B4GALT1	turquoise	tan
B4GALT5	turquoise	tan
BACH2	turquoise	tan
BAK1	brown	greenyellow
BANF1	black	black
BANK1	purple	tan
BARD1	brown	greenyellow
BASP1	purple	tan
BATF	yellow	cyan
BATF2	grey	grey
BAX	salmon	black
BAZ1B	blue	greenyellow
BAZ2B	purple	tan
BCAP31	magenta	greenyellow
BCAT1	brown	greenyellow
BCCIP	cyan	cyan
BCL10	tan	tan
BCL11A	pink	pink
BCL11B	greenyellow	greenyellow
BCL2	purple	tan
BCL2A1	turquoise	tan
BCL2L1	salmon	black
BCL2L12	yellow	cyan
BCL2L2	green	pink
BCL3	turquoise	tan
BCL6	purple	tan
BCL7C	black	black
BCL9	turquoise	tan
BCL9L	blue	greenyellow
BCOR	turquoise	tan
BECN1	black	black
BEX2	green	pink
BFAR	red	greenyellow
BICD2	greenyellow	greenyellow
BID	purple	tan
BIN1	red	greenyellow
BIN2	greenyellow	greenyellow
BIRC2	turquoise	tan
BIRC3	turquoise	tan
BIRC5	yellow	cyan
BIVM	brown	greenyellow
BLK	purple	tan
BLM	yellow	cyan
BLMH	brown	greenyellow
BLOC1S1	blue	greenyellow
BLVRB	green	pink
BLZF1	turquoise	tan
BMF	turquoise	tan
BMP6	midnightblue	pink
BNIP1	cyan	cyan
BOLA2	blue	greenyellow
BOLA3	yellow	cyan
BPGM	black	black
BPNT1	brown	greenyellow
BRCA1	brown	greenyellow
BRD3	red	greenyellow
BRD7	blue	greenyellow
BRI3	purple	tan
BRI3BP	brown	greenyellow
BRIP1	magenta	greenyellow
BRSK1	pink	pink
BSG	blue	greenyellow
BST1	pink	pink
BST2	blue	greenyellow
BTAF1	purple	tan
BTBD1	black	black
BTBD10	red	greenyellow
BTBD6	salmon	black
BTF3L4	black	black
BTG1	turquoise	tan
BTG2	brown	greenyellow
BTG3	yellow	cyan
BTK	green	pink
BTLA	turquoise	tan
BTN3A1	magenta	greenyellow
BTN3A2	greenyellow	greenyellow
BTN3A3	red	greenyellow
BUB1	brown	greenyellow
BUB3	blue	greenyellow
BYSL	yellow	cyan
BZRAP1	yellow	cyan
BZW2	cyan	cyan
C10orf11	green	pink
C10orf54	pink	pink
C10orf55	turquoise	tan
C10orf76	magenta	greenyellow
C11orf48	brown	greenyellow
C12orf4	brown	greenyellow
C12orf49	blue	greenyellow
C12orf57	red	greenyellow
C12orf61	turquoise	tan
C14orf1	magenta	greenyellow
C14orf119	magenta	greenyellow
C14orf142	yellow	cyan
C14orf169	blue	greenyellow
C15orf38	green	pink
C15orf39	purple	tan
C15orf41	blue	greenyellow
C16orf80	yellow	cyan
C17orf53	yellow	cyan
C17orf62	red	greenyellow
C18orf56	yellow	cyan
C19orf10	black	black
C19orf24	salmon	black
C19orf33	midnightblue	pink
C19orf48	yellow	cyan
C1QB	yellow	cyan
C1QBP	brown	greenyellow
C1QC	yellow	cyan
C1orf112	yellow	cyan
C1orf131	yellow	cyan
C1orf162	pink	pink
C1orf21	blue	greenyellow
C1orf54	green	pink
C2	brown	greenyellow
C3AR1	purple	tan
C3orf14	yellow	cyan
C3orf38	black	black
C4BPA	turquoise	tan
C5AR1	purple	tan
C6orf89	red	greenyellow
C7orf26	blue	greenyellow
C9orf16	red	greenyellow
C9orf40	yellow	cyan
C9orf41	magenta	greenyellow
C9orf72	purple	tan
C9orf89	pink	pink
CA1	grey	grey
CA2	midnightblue	pink
CAB39	greenyellow	greenyellow
CABIN1	blue	greenyellow
CABLES2	cyan	cyan
CABP5	midnightblue	pink
CACNA1I	green	pink
CACNA2D3	green	pink
CACYBP	red	greenyellow
CAD	brown	greenyellow
CALM1	blue	greenyellow
CALR	blue	greenyellow
CALU	blue	greenyellow
CAMK1	green	pink
CAMK1D	turquoise	tan
CAMK1G	turquoise	tan
CAMK2N1	green	pink
CAND1	brown	greenyellow
CANT1	salmon	black
CANX	magenta	greenyellow
CAP1	magenta	greenyellow
CAPG	pink	pink
CAPN12	green	pink
CAPN2	magenta	greenyellow
CAPNS1	greenyellow	greenyellow
CAPZB	red	greenyellow
CARD8	greenyellow	greenyellow
CARD9	green	pink
CARF	black	black
CARHSP1	brown	greenyellow
CASC3	black	black
CASC4	greenyellow	greenyellow
CASC5	blue	greenyellow
CASP2	blue	greenyellow
CASP3	yellow	cyan
CASP7	yellow	cyan
CASZ1	yellow	cyan
CAT	greenyellow	greenyellow
CATSPER1	green	pink
CAV1	grey	grey
CBFB	red	greenyellow
CBL	greenyellow	greenyellow
CBLB	brown	greenyellow
CBWD5	tan	tan
CBX3	cyan	cyan
CBX4	greenyellow	greenyellow
CBX5	brown	greenyellow
CBX7	green	pink
CCDC28B	yellow	cyan
CCDC34	yellow	cyan
CCDC47	cyan	cyan
CCDC50	tan	tan
CCDC53	blue	greenyellow
CCDC58	yellow	cyan
CCDC59	turquoise	tan
CCL2	turquoise	tan
CCL20	turquoise	tan
CCL3	turquoise	tan
CCL3L3	turquoise	tan
CCL4L1	turquoise	tan
CCL5	magenta	greenyellow
CCL7	turquoise	tan
CCL8	turquoise	tan
CCNA2	brown	greenyellow
CCNB1	yellow	cyan
CCNB2	yellow	cyan
CCNC	black	black
CCND2	turquoise	tan
CCNDBP1	greenyellow	greenyellow
CCNE1	brown	greenyellow
CCNE2	yellow	cyan
CCNF	yellow	cyan
CCNH	yellow	cyan
CCNL1	tan	tan
CCNT1	tan	tan
CCNT2	tan	tan
CCNY	pink	pink
CCR1	purple	tan
CCR4	turquoise	tan
CCR5	blue	greenyellow
CCR7	turquoise	tan
CCRL2	turquoise	tan
CCRN4L	turquoise	tan
CCT2	cyan	cyan
CCT3	blue	greenyellow
CCT4	magenta	greenyellow
CCT5	magenta	greenyellow
CCT6A	blue	greenyellow
CCT7	red	greenyellow
CCT8	blue	greenyellow
CD109	turquoise	tan
CD14	pink	pink
CD151	green	pink
CD160	blue	greenyellow
CD163	green	pink
CD19	green	pink
CD1A	green	pink
CD1C	pink	pink
CD1D	green	pink
CD2	brown	greenyellow
CD22	turquoise	tan
CD226	blue	greenyellow
CD24	green	pink
CD248	purple	tan
CD274	turquoise	tan
CD2BP2	brown	greenyellow
CD300A	black	black
CD300C	pink	pink
CD300E	turquoise	tan
CD300LB	purple	tan
CD300LF	green	pink
CD320	salmon	black
CD33	green	pink
CD36	pink	pink
CD37	tan	tan
CD38	brown	greenyellow
CD3D	blue	greenyellow
CD3E	blue	greenyellow
CD3G	brown	greenyellow
CD4	pink	pink
CD40	turquoise	tan
CD40LG	grey	grey
CD44	turquoise	tan
CD46	tan	tan
CD5	red	greenyellow
CD52	red	greenyellow
CD55	purple	tan
CD6	brown	greenyellow
CD63	purple	tan
CD68	purple	tan
CD69	turquoise	tan
CD79A	turquoise	tan
CD79B	green	pink
CD80	turquoise	tan
CD82	turquoise	tan
CD83	turquoise	tan
CD84	magenta	greenyellow
CD86	pink	pink
CD8A	brown	greenyellow
CD8B	brown	greenyellow
CD9	purple	tan
CD96	greenyellow	greenyellow
CD97	tan	tan
CD99	brown	greenyellow
CDA	purple	tan
CDC14B	black	black
CDC20	yellow	cyan
CDC23	blue	greenyellow
CDC25A	yellow	cyan
CDC25B	blue	greenyellow
CDC25C	yellow	cyan
CDC34	salmon	black
CDC42	black	black
CDC42EP2	purple	tan
CDC42EP3	turquoise	tan
CDC42EP4	green	pink
CDC42SE1	tan	tan
CDC6	magenta	greenyellow
CDC7	brown	greenyellow
CDCA2	yellow	cyan
CDCA3	yellow	cyan
CDCA4	yellow	cyan
CDCA5	yellow	cyan
CDCA7	brown	greenyellow
CDCA7L	brown	greenyellow
CDCA8	yellow	cyan
CDK2	brown	greenyellow
CDK2AP2	brown	greenyellow
CDK4	blue	greenyellow
CDK5	red	greenyellow
CDK5RAP2	brown	greenyellow
CDKN1A	pink	pink
CDKN1B	green	pink
CDKN1C	midnightblue	pink
CDKN3	yellow	cyan
CDT1	yellow	cyan
CDV3	black	black
CEACAM1	turquoise	tan
CEACAM3	purple	tan
CEBPA	green	pink
CEBPB	purple	tan
CEBPD	pink	pink
CECR1	pink	pink
CENPA	yellow	cyan
CENPE	brown	greenyellow
CENPF	brown	greenyellow
CENPM	yellow	cyan
CENPO	blue	greenyellow
CEP152	brown	greenyellow
CEP55	yellow	cyan
CES1	grey	grey
CFB	turquoise	tan
CFD	green	pink
CFL2	turquoise	tan
CFLAR	purple	tan
CHAC2	yellow	cyan
CHAF1A	brown	greenyellow
CHAF1B	brown	greenyellow
CHCHD1	cyan	cyan
CHCHD2	blue	greenyellow
CHCHD3	red	greenyellow
CHD1	turquoise	tan
CHD2	tan	tan
CHD7	turquoise	tan
CHD8	blue	greenyellow
CHEK1	yellow	cyan
CHI3L1	turquoise	tan
CHI3L2	brown	greenyellow
CHKA	turquoise	tan
CHMP1B	tan	tan
CHMP2B	tan	tan
CHMP4B	turquoise	tan
CHMP5	black	black
CHMP7	turquoise	tan
CHPT1	pink	pink
CHRAC1	tan	tan
CHRNE	turquoise	tan
CHST12	yellow	cyan
CHST13	green	pink
CHST7	purple	tan
CHSY1	turquoise	tan
CHTF18	yellow	cyan
CHURC1	green	pink
CIAPIN1	cyan	cyan
CIC	salmon	black
CIDEB	magenta	greenyellow
CIITA	grey	grey
CIRBP	tan	tan
CIRH1A	cyan	cyan
CIT	magenta	greenyellow
CITED4	purple	tan
CKAP2	brown	greenyellow
CKAP4	pink	pink
CKAP5	brown	greenyellow
CKS1B	yellow	cyan
CKS2	yellow	cyan
CLC	turquoise	tan
CLCF1	purple	tan
CLDN5	midnightblue	pink
CLDND1	brown	greenyellow
CLDND2	yellow	cyan
CLEC10A	green	pink
CLEC11A	green	pink
CLEC12A	pink	pink
CLEC1B	midnightblue	pink
CLEC2D	black	black
CLEC4A	pink	pink
CLEC4C	green	pink
CLEC4D	turquoise	tan
CLEC4E	turquoise	tan
CLEC5A	brown	greenyellow
CLEC7A	purple	tan
CLIC3	blue	greenyellow
CLIC4	tan	tan
CLK1	tan	tan
CLN6	blue	greenyellow
CLPP	blue	greenyellow
CLPTM1	red	greenyellow
CLPX	magenta	greenyellow
CLSPN	magenta	greenyellow
CLSTN1	magenta	greenyellow
CLTA	blue	greenyellow
CLTC	blue	greenyellow
CMAS	blue	greenyellow
CMIP	pink	pink
CMTM2	pink	pink
CMTM5	midnightblue	pink
CMTM8	grey	grey
CNDP2	blue	greenyellow
CNNM3	blue	greenyellow
CNOT1	magenta	greenyellow
CNOT2	salmon	black
CNOT3	red	greenyellow
CNOT6	greenyellow	greenyellow
CNOT6L	yellow	cyan
CNOT7	black	black
CNTNAP2	green	pink
COBLL1	green	pink
COG4	greenyellow	greenyellow
COL9A2	green	pink
COMMD10	black	black
COMMD4	cyan	cyan
COPA	magenta	greenyellow
COPB2	blue	greenyellow
COPE	black	black
COPG2	greenyellow	greenyellow
COPS3	brown	greenyellow
COPZ1	red	greenyellow
COQ2	blue	greenyellow
COQ3	yellow	cyan
COQ5	red	greenyellow
COQ9	red	greenyellow
CORO1A	red	greenyellow
CORO1B	green	pink
CORO7	salmon	black
COTL1	blue	greenyellow
COX17	black	black
COX5A	blue	greenyellow
COX5B	red	greenyellow
COX6A1	blue	greenyellow
COX6B1	red	greenyellow
COX7A2	blue	greenyellow
COX7B	cyan	cyan
COX8A	red	greenyellow
CPD	turquoise	tan
CPEB2	turquoise	tan
CPEB4	tan	tan
CPNE1	greenyellow	greenyellow
CPNE3	blue	greenyellow
CPNE8	green	pink
CPSF2	magenta	greenyellow
CPSF3	brown	greenyellow
CPSF6	brown	greenyellow
CPT1A	magenta	greenyellow
CPVL	pink	pink
CR1	turquoise	tan
CRADD	salmon	black
CREB1	greenyellow	greenyellow
CREB3L2	greenyellow	greenyellow
CREB5	pink	pink
CREBBP	tan	tan
CREG1	pink	pink
CRIP1	blue	greenyellow
CRIP2	green	pink
CRISPLD2	pink	pink
CRK	tan	tan
CRLF2	turquoise	tan
CRLF3	greenyellow	greenyellow
CRTAP	pink	pink
CRTC2	salmon	black
CRY1	turquoise	tan
CRYZ	brown	greenyellow
CSE1L	brown	greenyellow
CSF1	turquoise	tan
CSF1R	green	pink
CSF2RA	purple	tan
CSF2RB	turquoise	tan
CSF3	turquoise	tan
CSF3R	purple	tan
CSK	magenta	greenyellow
CSNK2A1	red	greenyellow
CSNK2A1P	blue	greenyellow
CSNK2A2	blue	greenyellow
CSRP1	blue	greenyellow
CST3	pink	pink
CST7	blue	greenyellow
CSTA	pink	pink
CSTB	tan	tan
CSTF2	yellow	cyan
CTBS	turquoise	tan
CTCF	red	greenyellow
CTDSP2	greenyellow	greenyellow
CTDSPL	midnightblue	pink
CTDSPL2	black	black
CTLA4	brown	greenyellow
CTNNA1	pink	pink
CTNNAL1	yellow	cyan
CTNNB1	tan	tan
CTR9	magenta	greenyellow
CTSB	green	pink
CTSC	greenyellow	greenyellow
CTSD	black	black
CTSG	yellow	cyan
CTSH	pink	pink
CTSL1	turquoise	tan
CTSO	pink	pink
CTSS	pink	pink
CTSW	blue	greenyellow
CTSZ	pink	pink
CTTN	midnightblue	pink
CUEDC1	green	pink
CUL1	blue	greenyellow
CX3CR1	blue	greenyellow
CXCL1	turquoise	tan
CXCL10	turquoise	tan
CXCL11	turquoise	tan
CXCL16	purple	tan
CXCL2	turquoise	tan
CXCL5	midnightblue	pink
CXCL9	grey	grey
CXCR3	yellow	cyan
CXCR4	tan	tan
CXCR6	yellow	cyan
CXXC5	green	pink
CXorf21	turquoise	tan
CXorf40A	salmon	black
CXorf40B	salmon	black
CYB5D1	salmon	black
CYB5R4	black	black
CYBA	black	black
CYBB	pink	pink
CYBRD1	green	pink
CYC1	blue	greenyellow
CYFIP1	pink	pink
CYLD	tan	tan
CYP1B1	green	pink
CYP27A1	green	pink
CYP2S1	green	pink
CYP4F3	turquoise	tan
CYSLTR1	pink	pink
DAB2	midnightblue	pink
DAD1	magenta	greenyellow
DAPK1	pink	pink
DAPP1	turquoise	tan
DARS2	brown	greenyellow
DAXX	red	greenyellow
DAZAP1	black	black
DCAKD	magenta	greenyellow
DCLRE1A	brown	greenyellow
DCP1A	turquoise	tan
DCP2	brown	greenyellow
DCPS	brown	greenyellow
DCTN2	blue	greenyellow
DCTN3	cyan	cyan
DCTN5	red	greenyellow
DCUN1D5	yellow	cyan
DCXR	blue	greenyellow
DDA1	cyan	cyan
DDB1	magenta	greenyellow
DDIT3	tan	tan
DDIT4	purple	tan
DDOST	blue	greenyellow
DDT	cyan	cyan
DDX1	blue	greenyellow
DDX21	tan	tan
DDX23	red	greenyellow
DDX24	turquoise	tan
DDX3X	tan	tan
DDX3Y	grey	grey
DDX50	black	black
DDX56	cyan	cyan
DDX58	grey	grey
DDX6	black	black
DECR1	brown	greenyellow
DEFB131	salmon	black
DEK	brown	greenyellow
DENND2D	brown	greenyellow
DENND3	purple	tan
DENND4A	turquoise	tan
DEPDC1B	yellow	cyan
DGAT2	turquoise	tan
DGKA	greenyellow	greenyellow
DGKQ	yellow	cyan
DHCR24	brown	greenyellow
DHCR7	yellow	cyan
DHFR	brown	greenyellow
DHRS3	brown	greenyellow
DHRS4L2	red	greenyellow
DHX15	cyan	cyan
DHX29	brown	greenyellow
DHX30	cyan	cyan
DHX32	green	pink
DHX33	cyan	cyan
DHX9	black	black
DIAPH1	greenyellow	greenyellow
DIAPH3	brown	greenyellow
DIP2A	blue	greenyellow
DIP2B	purple	tan
DIRC2	purple	tan
DKC1	cyan	cyan
DLAT	blue	greenyellow
DLD	black	black
DLG4	green	pink
DLL1	purple	tan
DMXL2	purple	tan
DNAJA1	yellow	cyan
DNAJB1	black	black
DNAJB11	cyan	cyan
DNAJB6	black	black
DNAJB9	green	pink
DNAJC1	magenta	greenyellow
DNAJC13	magenta	greenyellow
DNAJC15	blue	greenyellow
DNAJC3	cyan	cyan
DNAJC5	salmon	black
DNAJC7	red	greenyellow
DNASE1L1	pink	pink
DNASE1L3	green	pink
DNM1L	red	greenyellow
DNM2	red	greenyellow
DNM3	midnightblue	pink
DNMT1	blue	greenyellow
DNPEP	cyan	cyan
DOCK10	blue	greenyellow
DOCK11	greenyellow	greenyellow
DOCK5	turquoise	tan
DOCK8	greenyellow	greenyellow
DOK3	purple	tan
DOLPP1	brown	greenyellow
DONSON	yellow	cyan
DOT1L	turquoise	tan
DPEP2	pink	pink
DPF2	red	greenyellow
DPM1	black	black
DPM2	red	greenyellow
DPM3	salmon	black
DPP3	brown	greenyellow
DPP4	blue	greenyellow
DPP8	greenyellow	greenyellow
DPP9	blue	greenyellow
DPYD	pink	pink
DPYSL2	pink	pink
DR1	black	black
DRAP1	blue	greenyellow
DRG1	red	greenyellow
DRG2	blue	greenyellow
DSC1	green	pink
DSC2	pink	pink
DTL	brown	greenyellow
DTX3L	red	greenyellow
DUS1L	red	greenyellow
DUS3L	salmon	black
DUSP1	turquoise	tan
DUSP10	turquoise	tan
DUSP12	cyan	cyan
DUSP16	turquoise	tan
DUSP2	grey	grey
DUSP22	greenyellow	greenyellow
DUSP3	green	pink
DUSP5	turquoise	tan
DUSP6	purple	tan
DUSP8	turquoise	tan
DUT	yellow	cyan
DYM	greenyellow	greenyellow
DYNC1H1	greenyellow	greenyellow
DYNC1I2	red	greenyellow
DYNLL1	blue	greenyellow
DYNLRB2	yellow	cyan
DYNLT1	grey	grey
DYNLT3	turquoise	tan
DYRK1A	tan	tan
DYRK1B	blue	greenyellow
DYSF	pink	pink
E2F2	yellow	cyan
E2F4	blue	greenyellow
E2F7	brown	greenyellow
E2F8	brown	greenyellow
EAF1	turquoise	tan
EAF2	green	pink
EBNA1BP2	yellow	cyan
EBP	red	greenyellow
ECE1	turquoise	tan
ECH1	greenyellow	greenyellow
EDAR	green	pink
EDEM1	tan	tan
EDF1	red	greenyellow
EDN1	turquoise	tan
EEF1D	black	black
EEF1G	black	black
EFHC2	green	pink
EFTUD1	greenyellow	greenyellow
EFTUD2	blue	greenyellow
EGR1	tan	tan
EGR2	grey	grey
EGR3	turquoise	tan
EHD1	turquoise	tan
EHD4	turquoise	tan
EI24	black	black
EIF1	tan	tan
EIF1AX	cyan	cyan
EIF1AY	grey	grey
EIF1B	turquoise	tan
EIF2AK1	magenta	greenyellow
EIF2AK2	brown	greenyellow
EIF2B1	black	black
EIF2B2	brown	greenyellow
EIF2S2	blue	greenyellow
EIF4A1	black	black
EIF4B	black	black
EIF4E3	red	greenyellow
EIF4EBP2	red	greenyellow
EIF4ENIF1	red	greenyellow
EIF4H	black	black
EIF5	tan	tan
EIF5A	salmon	black
EIF5B	blue	greenyellow
ELAC2	blue	greenyellow
ELF1	tan	tan
ELL	turquoise	tan
ELMO2	turquoise	tan
ELOF1	cyan	cyan
ELOVL5	salmon	black
ELOVL6	yellow	cyan
ELP3	magenta	greenyellow
ELP4	greenyellow	greenyellow
EMILIN2	pink	pink
EML4	salmon	black
EMP1	pink	pink
EMP3	black	black
EMR1	purple	tan
EMR2	pink	pink
EMR3	turquoise	tan
ENC1	blue	greenyellow
ENG	greenyellow	greenyellow
ENO1	brown	greenyellow
ENO2	green	pink
ENPP4	yellow	cyan
ENSA	black	black
ENTPD1	pink	pink
ENTPD4	black	black
ENTPD6	black	black
EOMES	brown	greenyellow
EP400	red	greenyellow
EPB41L3	pink	pink
EPB42	grey	grey
EPC1	black	black
EPHA1	green	pink
EPHA4	purple	tan
EPHB6	green	pink
EPHX2	green	pink
EPRS	magenta	greenyellow
EPSTI1	grey	grey
ERAL1	blue	greenyellow
EREG	turquoise	tan
ERH	red	greenyellow
ERO1L	blue	greenyellow
ESAM	midnightblue	pink
ESCO2	magenta	greenyellow
ESD	black	black
ESM1	yellow	cyan
ESPL1	yellow	cyan
ESRRA	salmon	black
ETF1	turquoise	tan
ETFA	greenyellow	greenyellow
ETFDH	brown	greenyellow
ETNK1	blue	greenyellow
ETS1	magenta	greenyellow
ETS2	turquoise	tan
ETV3	turquoise	tan
EXO1	brown	greenyellow
EXOC2	greenyellow	greenyellow
EXOSC1	blue	greenyellow
EXOSC2	cyan	cyan
EXOSC3	yellow	cyan
EXOSC4	salmon	black
EXOSC5	greenyellow	greenyellow
EXOSC6	grey	grey
EXOSC9	yellow	cyan
EXT1	pink	pink
EZH2	yellow	cyan
F13A1	pink	pink
F2RL1	green	pink
F5	pink	pink
FADD	yellow	cyan
FAIM3	greenyellow	greenyellow
FAM101B	tan	tan
FAM102A	purple	tan
FAM105A	red	greenyellow
FAM105B	yellow	cyan
FAM108A2	red	greenyellow
FAM111B	brown	greenyellow
FAM122B	greenyellow	greenyellow
FAM20B	red	greenyellow
FAM3C	tan	tan
FAM43A	green	pink
FAM46A	pink	pink
FAM46C	cyan	cyan
FAM49A	turquoise	tan
FAM53B	blue	greenyellow
FAM63A	pink	pink
FAM64A	yellow	cyan
FAM65A	brown	greenyellow
FAM72A	yellow	cyan
FAM73B	salmon	black
FAM76B	black	black
FAM78A	magenta	greenyellow
FAM8A1	yellow	cyan
FAM96B	blue	greenyellow
FAM98A	yellow	cyan
FANCD2	brown	greenyellow
FANCG	yellow	cyan
FARSB	magenta	greenyellow
FASLG	yellow	cyan
FASN	cyan	cyan
FASTKD3	black	black
FBN2	green	pink
FBP1	pink	pink
FBXL16	green	pink
FBXL5	pink	pink
FBXL6	salmon	black
FBXO31	cyan	cyan
FBXO33	cyan	cyan
FBXO5	brown	greenyellow
FBXO6	brown	greenyellow
FBXO7	black	black
FBXW2	blue	greenyellow
FBXW5	red	greenyellow
FCAR	turquoise	tan
FCER1G	pink	pink
FCER2	turquoise	tan
FCF1	red	greenyellow
FCGBP	green	pink
FCGR1A	brown	greenyellow
FCGR1B	brown	greenyellow
FCGR2A	pink	pink
FCGR2B	purple	tan
FCGR2C	turquoise	tan
FCGR3B	turquoise	tan
FCGRT	green	pink
FCHSD2	pink	pink
FCN1	pink	pink
FCRL1	turquoise	tan
FCRL2	green	pink
FCRL3	greenyellow	greenyellow
FCRL6	blue	greenyellow
FDFT1	blue	greenyellow
FEM1C	turquoise	tan
FEN1	yellow	cyan
FES	green	pink
FEZ1	green	pink
FFAR1	turquoise	tan
FFAR2	turquoise	tan
FGL2	pink	pink
FGR	pink	pink
FH	brown	greenyellow
FHL1	midnightblue	pink
FHL2	yellow	cyan
FHL3	salmon	black
FHOD1	grey	grey
FIBP	blue	greenyellow
FIGNL1	cyan	cyan
FKBP11	blue	greenyellow
FKBP1A	greenyellow	greenyellow
FKBP2	red	greenyellow
FKBP4	blue	greenyellow
FKBP5	blue	greenyellow
FLII	red	greenyellow
FLJ45445	turquoise	tan
FLNA	blue	greenyellow
FLNB	green	pink
FLT3LG	grey	grey
FNBP4	tan	tan
FNTA	red	greenyellow
FOLR3	pink	pink
FOS	brown	greenyellow
FOSB	blue	greenyellow
FOSL2	turquoise	tan
FOXK1	salmon	black
FOXM1	brown	greenyellow
FOXP1	turquoise	tan
FOXRED1	yellow	cyan
FPR1	tan	tan
FRAT1	greenyellow	greenyellow
FRG1	brown	greenyellow
FRY	turquoise	tan
FTL	tan	tan
FTSJ1	red	greenyellow
FTSJ3	blue	greenyellow
FUBP3	black	black
FURIN	turquoise	tan
FUT11	magenta	greenyellow
FUT8	brown	greenyellow
FXYD5	purple	tan
FYB	greenyellow	greenyellow
FYN	blue	greenyellow
FZD2	green	pink
G0S2	turquoise	tan
G3BP1	brown	greenyellow
G3BP2	tan	tan
G6PC3	magenta	greenyellow
G6PD	blue	greenyellow
GAA	pink	pink
GAB2	purple	tan
GAB3	red	greenyellow
GABARAPL1	tan	tan
GABBR1	purple	tan
GABPB2	red	greenyellow
GADD45A	turquoise	tan
GADD45B	turquoise	tan
GALM	brown	greenyellow
GALNT3	purple	tan
GALR2	turquoise	tan
GANAB	magenta	greenyellow
GAPDH	red	greenyellow
GARS	cyan	cyan
GART	brown	greenyellow
GAS7	pink	pink
GATAD2B	red	greenyellow
GBF1	blue	greenyellow
GBGT1	green	pink
GBP1	brown	greenyellow
GBP2	brown	greenyellow
GBP4	brown	greenyellow
GBP5	brown	greenyellow
GCA	pink	pink
GCAT	yellow	cyan
GCH1	salmon	black
GCHFR	black	black
GDI2	greenyellow	greenyellow
GDPD5	green	pink
GEMIN5	blue	greenyellow
GEMIN6	yellow	cyan
GFI1	yellow	cyan
GFOD1	grey	grey
GFRA2	green	pink
GGH	yellow	cyan
GIMAP4	blue	greenyellow
GIMAP6	red	greenyellow
GIMAP7	blue	greenyellow
GIMAP8	blue	greenyellow
GIPC1	blue	greenyellow
GIT1	blue	greenyellow
GIT2	greenyellow	greenyellow
GK	turquoise	tan
GLA	tan	tan
GLB1	magenta	greenyellow
GLCCI1	greenyellow	greenyellow
GLDC	grey	grey
GLG1	magenta	greenyellow
GLO1	black	black
GLT1D1	turquoise	tan
GLUL	turquoise	tan
GM2A	pink	pink
GMCL1	brown	greenyellow
GMNN	yellow	cyan
GMPPB	yellow	cyan
GMPR	grey	grey
GNA12	turquoise	tan
GNA13	turquoise	tan
GNA15	purple	tan
GNAI2	greenyellow	greenyellow
GNAQ	pink	pink
GNB2	magenta	greenyellow
GNB4	pink	pink
GNG11	midnightblue	pink
GNG2	tan	tan
GNG7	green	pink
GNG8	midnightblue	pink
GNGT2	brown	greenyellow
GNL3	salmon	black
GNL3L	blue	greenyellow
GNLY	red	greenyellow
GNPAT	magenta	greenyellow
GNS	pink	pink
GOLGA8A	grey	grey
GOLGA8B	purple	tan
GOLGB1	grey	grey
GOLPH3	black	black
GOLPH3L	blue	greenyellow
GORASP1	green	pink
GORASP2	cyan	cyan
GOT1	brown	greenyellow
GOT2	blue	greenyellow
GP9	midnightblue	pink
GPAA1	red	greenyellow
GPBAR1	green	pink
GPI	blue	greenyellow
GPR108	salmon	black
GPR114	blue	greenyellow
GPR132	turquoise	tan
GPR160	pink	pink
GPR162	green	pink
GPR171	magenta	greenyellow
GPR174	magenta	greenyellow
GPR18	salmon	black
GPR55	yellow	cyan
GPR56	blue	greenyellow
GPR65	purple	tan
GPR84	turquoise	tan
GPR89A	greenyellow	greenyellow
GPR97	turquoise	tan
GPRC5D	cyan	cyan
GPSM3	black	black
GPX1	pink	pink
GPX4	black	black
GPX7	yellow	cyan
GRAMD1A	turquoise	tan
GRAMD3	yellow	cyan
GRAP2	brown	greenyellow
GRASP	turquoise	tan
GRB2	black	black
GRINA	purple	tan
GRK5	turquoise	tan
GRN	pink	pink
GRPEL1	tan	tan
GSG2	yellow	cyan
GSR	magenta	greenyellow
GSS	greenyellow	greenyellow
GSTK1	blue	greenyellow
GSTM1	grey	grey
GSTM2	grey	grey
GSTM3	grey	grey
GSTT1	green	pink
GTF2E1	red	greenyellow
GTF2H3	red	greenyellow
GTF3C1	red	greenyellow
GTF3C4	turquoise	tan
GTF3C5	red	greenyellow
GTPBP1	turquoise	tan
GTPBP4	turquoise	tan
GTSE1	yellow	cyan
GUF1	cyan	cyan
GUK1	salmon	black
GYG1	brown	greenyellow
GYPC	black	black
GYS1	blue	greenyellow
GZMA	magenta	greenyellow
GZMB	brown	greenyellow
GZMH	brown	greenyellow
GZMK	magenta	greenyellow
GZMM	red	greenyellow
H1F0	pink	pink
H1FX	black	black
H2AFX	blue	greenyellow
H2AFZ	brown	greenyellow
H3F3A	tan	tan
H3F3B	turquoise	tan
HADHA	magenta	greenyellow
HAL	pink	pink
HAPLN3	salmon	black
HAT1	brown	greenyellow
HAVCR2	yellow	cyan
HBA2	grey	grey
HBB	grey	grey
HBD	grey	grey
HBEGF	green	pink
HBG2	grey	grey
HBM	grey	grey
HBP1	tan	tan
HBQ1	grey	grey
HCFC1	blue	greenyellow
HCK	pink	pink
HCP5	yellow	cyan
HCST	magenta	greenyellow
HDAC1	magenta	greenyellow
HDAC3	greenyellow	greenyellow
HDC	turquoise	tan
HDDC2	blue	greenyellow
HDGF	red	greenyellow
HEATR1	yellow	cyan
HEATR5B	greenyellow	greenyellow
HECA	tan	tan
HECTD1	black	black
HECTD3	blue	greenyellow
HELLS	brown	greenyellow
HELZ	magenta	greenyellow
HEMGN	grey	grey
HERC3	pink	pink
HERC5	turquoise	tan
HERC6	salmon	black
HERPUD1	tan	tan
HES1	turquoise	tan
HES4	green	pink
HEXB	pink	pink
HGD	midnightblue	pink
HHEX	green	pink
HIATL1	greenyellow	greenyellow
HIBCH	yellow	cyan
HIF1A	turquoise	tan
HIF1AN	blue	greenyellow
HIGD1A	brown	greenyellow
HIGD2A	blue	greenyellow
HINT2	blue	greenyellow
HIP1	purple	tan
HIPK2	green	pink
HIRIP3	yellow	cyan
HIST1H1B	magenta	greenyellow
HIST1H1C	brown	greenyellow
HIST1H1D	blue	greenyellow
HIST1H1E	magenta	greenyellow
HIST1H2AB	magenta	greenyellow
HIST1H2AC	midnightblue	pink
HIST1H2AE	magenta	greenyellow
HIST1H2AG	magenta	greenyellow
HIST1H2AH	magenta	greenyellow
HIST1H2AI	magenta	greenyellow
HIST1H2AM	blue	greenyellow
HIST1H2BB	magenta	greenyellow
HIST1H2BD	brown	greenyellow
HIST1H2BE	blue	greenyellow
HIST1H2BF	magenta	greenyellow
HIST1H2BG	magenta	greenyellow
HIST1H2BH	blue	greenyellow
HIST1H2BI	magenta	greenyellow
HIST1H2BJ	blue	greenyellow
HIST1H2BK	magenta	greenyellow
HIST1H2BL	magenta	greenyellow
HIST1H2BM	magenta	greenyellow
HIST1H2BO	magenta	greenyellow
HIST1H3B	magenta	greenyellow
HIST1H3C	blue	greenyellow
HIST1H3D	magenta	greenyellow
HIST1H3F	magenta	greenyellow
HIST1H3G	blue	greenyellow
HIST1H3H	magenta	greenyellow
HIST1H3J	magenta	greenyellow
HIST1H4A	magenta	greenyellow
HIST1H4B	blue	greenyellow
HIST1H4C	blue	greenyellow
HIST1H4D	magenta	greenyellow
HIST1H4E	magenta	greenyellow
HIST1H4H	magenta	greenyellow
HIST1H4J	blue	greenyellow
HIST1H4L	magenta	greenyellow
HIST2H2AB	magenta	greenyellow
HIST2H2AC	magenta	greenyellow
HIST2H2BE	purple	tan
HIST3H2A	red	greenyellow
HIVEP1	turquoise	tan
HK1	blue	greenyellow
HK2	purple	tan
HK3	green	pink
HLA-DMB	pink	pink
HLA-DOA	pink	pink
HLA-DOB	purple	tan
HLA-DPA1	tan	tan
HLA-DPB1	tan	tan
HLA-DQA1	tan	tan
HLA-DQB1	grey	grey
HLA-DRA	pink	pink
HLA-DRB1	grey	grey
HLA-DRB3	black	black
HLA-DRB4	grey	grey
HLA-DRB5	grey	grey
HLA-DRB6	black	black
HLA-F	salmon	black
HLA-H	salmon	black
HMGA1	salmon	black
HMGB2	brown	greenyellow
HMGB3	yellow	cyan
HMGCS1	yellow	cyan
HMGN1	cyan	cyan
HMGN2	red	greenyellow
HMGN4	greenyellow	greenyellow
HMMR	yellow	cyan
HMOX1	green	pink
HN1	red	greenyellow
HNMT	green	pink
HOMER3	green	pink
HOOK1	green	pink
HOXA5	green	pink
HOXB7	yellow	cyan
HP1BP3	greenyellow	greenyellow
HPGD	salmon	black
HPRT1	brown	greenyellow
HPS3	greenyellow	greenyellow
HPS6	red	greenyellow
HPSE	pink	pink
HS1BP3	black	black
HS3ST3B1	turquoise	tan
HSF2	black	black
HSH2D	turquoise	tan
HSP90AA1	brown	greenyellow
HSP90AB1	cyan	cyan
HSP90B1	cyan	cyan
HSPA14	cyan	cyan
HSPA1A	purple	tan
HSPA1B	tan	tan
HSPA4	brown	greenyellow
HSPA8	blue	greenyellow
HSPBP1	yellow	cyan
HSPD1	yellow	cyan
HSPE1	cyan	cyan
HSPH1	brown	greenyellow
HTATIP2	black	black
HTRA2	salmon	black
HUWE1	blue	greenyellow
HYOU1	brown	greenyellow
HYPK	green	pink
IAH1	black	black
IARS	blue	greenyellow
IARS2	greenyellow	greenyellow
IBTK	magenta	greenyellow
ICA1	yellow	cyan
ICAM1	turquoise	tan
ICAM2	red	greenyellow
ICAM3	purple	tan
ICMT	brown	greenyellow
ICOS	turquoise	tan
ICOSLG	turquoise	tan
ICT1	blue	greenyellow
ID1	green	pink
ID3	turquoise	tan
IDE	greenyellow	greenyellow
IDH2	brown	greenyellow
IDH3A	black	black
IDH3G	greenyellow	greenyellow
IDI1	tan	tan
IDUA	salmon	black
IER2	turquoise	tan
IER3	turquoise	tan
IER5	tan	tan
IFI16	red	greenyellow
IFI27	yellow	cyan
IFI30	pink	pink
IFI35	brown	greenyellow
IFI44	purple	tan
IFI44L	purple	tan
IFI6	salmon	black
IFIH1	turquoise	tan
IFIT1	turquoise	tan
IFIT2	turquoise	tan
IFIT3	turquoise	tan
IFIT5	turquoise	tan
IFITM2	purple	tan
IFITM3	purple	tan
IFNG	yellow	cyan
IFNGR1	purple	tan
IFNGR2	purple	tan
IFRD1	turquoise	tan
IFRD2	salmon	black
IGBP1	greenyellow	greenyellow
IGF1R	turquoise	tan
IGF2BP2	midnightblue	pink
IGF2BP3	purple	tan
IGFBP7	pink	pink
IGJ	cyan	cyan
IGLL1	grey	grey
IGSF6	pink	pink
IK	black	black
IKZF3	blue	greenyellow
IL10RA	tan	tan
IL12RB1	brown	greenyellow
IL12RB2	brown	greenyellow
IL13RA1	pink	pink
IL18R1	red	greenyellow
IL18RAP	red	greenyellow
IL1A	turquoise	tan
IL1B	turquoise	tan
IL1R1	turquoise	tan
IL1R2	turquoise	tan
IL1RN	turquoise	tan
IL21R	turquoise	tan
IL23A	turquoise	tan
IL27RA	blue	greenyellow
IL2RA	turquoise	tan
IL2RB	red	greenyellow
IL2RG	magenta	greenyellow
IL32	brown	greenyellow
IL3RA	turquoise	tan
IL4R	turquoise	tan
IL6	turquoise	tan
IL6R	purple	tan
IL6ST	turquoise	tan
IL7R	purple	tan
IL8	turquoise	tan
ILF2	cyan	cyan
ILK	magenta	greenyellow
IMMT	blue	greenyellow
IMP3	red	greenyellow
IMP4	cyan	cyan
IMPA2	pink	pink
IMPDH2	black	black
INCENP	brown	greenyellow
INHBA	turquoise	tan
INPP4A	magenta	greenyellow
INPP5A	turquoise	tan
INPP5D	greenyellow	greenyellow
INPP5E	grey	grey
INSIG1	tan	tan
IPMK	turquoise	tan
IPO13	blue	greenyellow
IPO4	salmon	black
IPO8	blue	greenyellow
IPO9	red	greenyellow
IQGAP2	magenta	greenyellow
IQSEC1	turquoise	tan
IRAK2	turquoise	tan
IRAK3	purple	tan
IRAK4	greenyellow	greenyellow
IRF1	brown	greenyellow
IRF2	magenta	greenyellow
IRF2BP1	salmon	black
IRF2BP2	tan	tan
IRF3	blue	greenyellow
IRF4	turquoise	tan
IRF5	green	pink
IRF7	purple	tan
IRF8	tan	tan
IRS2	purple	tan
ISG15	grey	grey
ISG20L2	cyan	cyan
ISOC1	red	greenyellow
ISOC2	yellow	cyan
ITGA1	blue	greenyellow
ITGA2B	midnightblue	pink
ITGA4	greenyellow	greenyellow
ITGA5	purple	tan
ITGAL	blue	greenyellow
ITGAM	pink	pink
ITGAX	purple	tan
ITGB3	midnightblue	pink
ITGB5	midnightblue	pink
ITGB7	greenyellow	greenyellow
ITGB8	turquoise	tan
ITK	cyan	cyan
ITM2A	blue	greenyellow
ITM2C	grey	grey
ITPK1	salmon	black
ITPKB	black	black
ITPR1	black	black
ITPR3	blue	greenyellow
IVD	red	greenyellow
IVNS1ABP	turquoise	tan
JAK1	black	black
JAK2	blue	greenyellow
JAM3	midnightblue	pink
JARID2	turquoise	tan
JMJD1C	tan	tan
JMY	tan	tan
JOSD1	turquoise	tan
JOSD2	cyan	cyan
JTB	blue	greenyellow
JUN	blue	greenyellow
JUNB	tan	tan
JUND	turquoise	tan
JUP	purple	tan
KARS	red	greenyellow
KBTBD11	green	pink
KBTBD8	turquoise	tan
KCNA3	turquoise	tan
KCNJ15	turquoise	tan
KCNJ2	turquoise	tan
KCNMB1	pink	pink
KCTD9	brown	greenyellow
KDELC2	brown	greenyellow
KDELR1	greenyellow	greenyellow
KDELR2	blue	greenyellow
KEAP1	red	greenyellow
KHDRBS1	red	greenyellow
KHSRP	brown	greenyellow
KIAA0101	magenta	greenyellow
KIAA0195	blue	greenyellow
KIAA0196	red	greenyellow
KIAA0247	purple	tan
KIAA0355	purple	tan
KIAA0391	blue	greenyellow
KIAA0513	pink	pink
KIAA0922	red	greenyellow
KIAA1147	purple	tan
KIAA1324	purple	tan
KIAA1429	black	black
KIAA1524	magenta	greenyellow
KIAA1598	pink	pink
KIAA1683	purple	tan
KIAA1715	red	greenyellow
KIAA2026	greenyellow	greenyellow
KIF11	brown	greenyellow
KIF13B	blue	greenyellow
KIF14	yellow	cyan
KIF15	yellow	cyan
KIF18A	brown	greenyellow
KIF19	yellow	cyan
KIF20A	yellow	cyan
KIF21B	brown	greenyellow
KIF23	brown	greenyellow
KIF2C	yellow	cyan
KIF3B	black	black
KIF4A	yellow	cyan
KIF5B	black	black
KIF5C	green	pink
KIFAP3	yellow	cyan
KIFC1	yellow	cyan
KIR2DL1	turquoise	tan
KIR2DL3	turquoise	tan
KIR2DL5B	turquoise	tan
KIR2DS1	turquoise	tan
KIR2DS3	turquoise	tan
KIR2DS4	turquoise	tan
KIR3DL1	turquoise	tan
KIR3DL2	turquoise	tan
KIR3DL3	turquoise	tan
KLF10	turquoise	tan
KLF11	pink	pink
KLF13	black	black
KLF3	greenyellow	greenyellow
KLF4	pink	pink
KLF5	turquoise	tan
KLF6	turquoise	tan
KLF7	turquoise	tan
KLF9	purple	tan
KLHDC3	magenta	greenyellow
KLHDC4	yellow	cyan
KLHDC8B	green	pink
KLHL12	blue	greenyellow
KLHL15	turquoise	tan
KLHL21	turquoise	tan
KLHL3	green	pink
KLRB1	green	pink
KLRC1	red	greenyellow
KLRC2	grey	grey
KLRC3	greenyellow	greenyellow
KLRC4	magenta	greenyellow
KLRD1	red	greenyellow
KLRF1	green	pink
KLRG1	magenta	greenyellow
KNTC1	brown	greenyellow
KPNA2	brown	greenyellow
KPNA3	red	greenyellow
KPNA6	blue	greenyellow
KPNB1	brown	greenyellow
KRAS	yellow	cyan
KRCC1	greenyellow	greenyellow
KRT1	grey	grey
KTN1	greenyellow	greenyellow
KYNU	pink	pink
LACTB	pink	pink
LAG3	yellow	cyan
LAIR2	yellow	cyan
LAMA5	green	pink
LAMB3	turquoise	tan
LAMC1	green	pink
LAMP3	turquoise	tan
LANCL1	brown	greenyellow
LAP3	grey	grey
LAPTM5	tan	tan
LARP7	black	black
LARS	greenyellow	greenyellow
LAT	brown	greenyellow
LAT2	pink	pink
LATS2	purple	tan
LAX1	brown	greenyellow
LBH	red	greenyellow
LBR	blue	greenyellow
LCK	magenta	greenyellow
LCMT2	salmon	black
LCN2	midnightblue	pink
LCP2	turquoise	tan
LDHA	yellow	cyan
LDHB	brown	greenyellow
LDLR	yellow	cyan
LDLRAP1	green	pink
LEF1	grey	grey
LEO1	magenta	greenyellow
LFNG	brown	greenyellow
LGALS2	green	pink
LGALS3	pink	pink
LGALS3BP	red	greenyellow
LGALS9	tan	tan
LGMN	turquoise	tan
LHFPL2	tan	tan
LIG1	brown	greenyellow
LILRA2	pink	pink
LILRA3	pink	pink
LILRA5	purple	tan
LILRB2	purple	tan
LILRB3	turquoise	tan
LILRB4	purple	tan
LIM2	yellow	cyan
LIMA1	brown	greenyellow
LIMK2	turquoise	tan
LIMS1	black	black
LIN7A	purple	tan
LIPA	tan	tan
LITAF	tan	tan
LMAN1	blue	greenyellow
LMAN2	blue	greenyellow
LMNA	midnightblue	pink
LMNB1	brown	greenyellow
LMNB2	yellow	cyan
LMO2	green	pink
LOC257358	turquoise	tan
LOC338799	black	black
LOC388692	greenyellow	greenyellow
LOC407835	salmon	black
LOC606724	brown	greenyellow
LOC613037	grey	grey
LOC653566	salmon	black
LOC81691	yellow	cyan
LONRF1	turquoise	tan
LPGAT1	greenyellow	greenyellow
LPP	pink	pink
LPPR2	purple	tan
LPXN	magenta	greenyellow
LRBA	blue	greenyellow
LRG1	purple	tan
LRP1	purple	tan
LRP3	green	pink
LRRC20	yellow	cyan
LRRC25	yellow	cyan
LRRC32	turquoise	tan
LRRC33	turquoise	tan
LRRC42	yellow	cyan
LRRC45	yellow	cyan
LRRC8C	black	black
LRRC8D	black	black
LRRCC1	brown	greenyellow
LRRFIP1	turquoise	tan
LRRK2	pink	pink
LRRN3	yellow	cyan
LSG1	cyan	cyan
LSM10	black	black
LSM12	black	black
LSM2	yellow	cyan
LSM3	cyan	cyan
LSM4	red	greenyellow
LSM7	black	black
LSMD1	red	greenyellow
LSP1	tan	tan
LST1	pink	pink
LTA	turquoise	tan
LTA4H	pink	pink
LTB	brown	greenyellow
LTB4R	green	pink
LTBP3	salmon	black
LTBR	green	pink
LUZP1	cyan	cyan
LXN	yellow	cyan
LY6E	red	greenyellow
LY86	pink	pink
LY96	pink	pink
LYAR	brown	greenyellow
LYL1	green	pink
LYN	purple	tan
LYPD2	green	pink
LYPD3	turquoise	tan
LYPLA2	greenyellow	greenyellow
LYST	greenyellow	greenyellow
LYZ	green	pink
LZIC	blue	greenyellow
M6PR	greenyellow	greenyellow
MACF1	greenyellow	greenyellow
MAD1L1	salmon	black
MAD2L1	brown	greenyellow
MAD2L2	yellow	cyan
MAEA	black	black
MAF	blue	greenyellow
MAF1	red	greenyellow
MAFB	pink	pink
MAFF	turquoise	tan
MAL	green	pink
MALAT1	turquoise	tan
MAML2	turquoise	tan
MAN1A1	greenyellow	greenyellow
MAN1C1	green	pink
MAN2B1	purple	tan
MAN2C1	grey	grey
MANBA	pink	pink
MAP1LC3A	yellow	cyan
MAP1LC3B	turquoise	tan
MAP2K3	turquoise	tan
MAP2K6	brown	greenyellow
MAP3K11	purple	tan
MAP3K2	turquoise	tan
MAP3K7	blue	greenyellow
MAP3K8	tan	tan
MAP4K1	blue	greenyellow
MAP4K4	turquoise	tan
MAPK1	blue	greenyellow
MAPK13	yellow	cyan
MAPK6	turquoise	tan
MAPK8IP3	turquoise	tan
MAPK9	black	black
MAPKAP1	greenyellow	greenyellow
MAPKAPK2	tan	tan
MAPRE1	black	black
MARCKS	purple	tan
MARCKSL1	tan	tan
MARCO	pink	pink
MASTL	brown	greenyellow
MAT2A	cyan	cyan
MATK	blue	greenyellow
MBD4	magenta	greenyellow
MCCC2	greenyellow	greenyellow
MCL1	tan	tan
MCM10	yellow	cyan
MCM2	yellow	cyan
MCM3	brown	greenyellow
MCM4	brown	greenyellow
MCM5	brown	greenyellow
MCM6	brown	greenyellow
MCM7	brown	greenyellow
MCM8	magenta	greenyellow
MCOLN1	green	pink
MCOLN2	yellow	cyan
MCTP1	pink	pink
MDFIC	greenyellow	greenyellow
MDH1	brown	greenyellow
MDH2	blue	greenyellow
MDM4	tan	tan
ME2	greenyellow	greenyellow
MED12	blue	greenyellow
MEF2A	pink	pink
MEF2C	green	pink
MEF2D	tan	tan
MEFV	pink	pink
MEGF9	pink	pink
MELK	yellow	cyan
MERTK	green	pink
MESDC1	turquoise	tan
METAP1	blue	greenyellow
METAP2	brown	greenyellow
METRNL	tan	tan
METTL1	salmon	black
METTL2A	magenta	greenyellow
METTL3	greenyellow	greenyellow
METTL5	cyan	cyan
METTL7A	green	pink
MFAP1	yellow	cyan
MFHAS1	grey	grey
MFSD1	green	pink
MGAM	turquoise	tan
MGAT5	turquoise	tan
MGRN1	turquoise	tan
MGST1	green	pink
MGST2	green	pink
MIB2	yellow	cyan
MICAL1	green	pink
MICALCL	pink	pink
MICB	brown	greenyellow
MID1IP1	purple	tan
MIDN	turquoise	tan
MIF	cyan	cyan
MIF4GD	magenta	greenyellow
MKI67	magenta	greenyellow
MKL1	red	greenyellow
MKNK2	turquoise	tan
MKRN2	cyan	cyan
MLF1IP	yellow	cyan
MLF2	black	black
MLH1	cyan	cyan
MLH3	grey	grey
MLX	greenyellow	greenyellow
MMD	purple	tan
MME	turquoise	tan
MMP25	purple	tan
MMP9	turquoise	tan
MN1	turquoise	tan
MND1	yellow	cyan
MNDA	pink	pink
MNT	green	pink
MORC2	red	greenyellow
MORC3	black	black
MORF4L1	black	black
MOV10	yellow	cyan
MPDU1	red	greenyellow
MPL	midnightblue	pink
MPO	purple	tan
MPP1	purple	tan
MPP6	yellow	cyan
MPPE1	blue	greenyellow
MRE11A	blue	greenyellow
MRFAP1	tan	tan
MRFAP1L1	blue	greenyellow
MRPL1	yellow	cyan
MRPL10	brown	greenyellow
MRPL11	cyan	cyan
MRPL12	salmon	black
MRPL13	yellow	cyan
MRPL15	yellow	cyan
MRPL16	brown	greenyellow
MRPL17	yellow	cyan
MRPL19	brown	greenyellow
MRPL20	black	black
MRPL21	black	black
MRPL22	yellow	cyan
MRPL23	salmon	black
MRPL24	red	greenyellow
MRPL35	yellow	cyan
MRPL37	brown	greenyellow
MRPL39	yellow	cyan
MRPL4	cyan	cyan
MRPL40	greenyellow	greenyellow
MRPL41	salmon	black
MRPL42	cyan	cyan
MRPL43	red	greenyellow
MRPL46	yellow	cyan
MRPL47	cyan	cyan
MRPL49	black	black
MRPL50	yellow	cyan
MRPL51	brown	greenyellow
MRPL53	blue	greenyellow
MRPL54	black	black
MRPS10	brown	greenyellow
MRPS11	brown	greenyellow
MRPS15	brown	greenyellow
MRPS16	red	greenyellow
MRPS17	yellow	cyan
MRPS18B	blue	greenyellow
MRPS21	red	greenyellow
MRPS27	red	greenyellow
MRPS31	blue	greenyellow
MRPS34	red	greenyellow
MRPS35	black	black
MRPS5	red	greenyellow
MRPS7	blue	greenyellow
MRPS9	brown	greenyellow
MS4A1	turquoise	tan
MS4A6A	green	pink
MS4A7	pink	pink
MSC	turquoise	tan
MSH6	yellow	cyan
MSLN	grey	grey
MSN	greenyellow	greenyellow
MST4	black	black
MT1A	brown	greenyellow
MT1E	brown	greenyellow
MT1F	blue	greenyellow
MT1G	brown	greenyellow
MT1H	brown	greenyellow
MT1M	magenta	greenyellow
MT1X	brown	greenyellow
MT2A	brown	greenyellow
MTA1	salmon	black
MTA2	magenta	greenyellow
MTCH2	magenta	greenyellow
MTF1	turquoise	tan
MTHFD1	blue	greenyellow
MTHFD1L	yellow	cyan
MTHFD2	brown	greenyellow
MTM1	tan	tan
MTMR11	green	pink
MTMR12	red	greenyellow
MTMR4	red	greenyellow
MTSS1	turquoise	tan
MTX3	black	black
MVD	yellow	cyan
MVP	blue	greenyellow
MX1	turquoise	tan
[truncated: 1,590 more rows]

## Sheet: S3 Table
Supplementary Table S3. Differentially expressed genes (DEGs) identified between ALL patients and healthy controls (GSE26713 and GSE67684)
Gene symbol	logFC	AveExpr	t	P.Value	adj.P.Val	B
MLLT11	3.98228	10.3117	14.1557	7.89E-32	7.03163347784326e-28	61.4507156277927
CTSS	-3.86816	8.45598	-13.2506	4.64E-29	2.06886975141071e-25	55.217496293563
LILRB2	-3.73149	7.86811	-12.113	1.36E-25	4.03884356151769e-22	47.4103551112363
CSF2RB	-4.3869	8.20482	-11.4448	1.42E-23	3.15805276899763e-20	42.8637847957726
NCF2	-5.09429	7.99184	-11.1943	8.00E-23	1.42447202055193e-19	41.1714355199535
RASSF2	-3.16319	9.13019	-11.0731	1.84E-22	2.73523184624804e-19	40.3546685692614
HLX	-4.1744	7.88459	-11.0409	2.30E-22	2.92446073004229e-19	40.1383839503027
THEMIS2	-4.00675	8.64515	-10.9578	4.07E-22	4.52697336804341e-19	39.5801977276731
GRN	-3.3974	9.03524	-10.8904	6.45E-22	6.3751772041819e-19	39.1283926322278
ITGAM	-4.81383	7.87162	-10.8753	7.16E-22	6.3751772041819e-19	39.0268847478542
GPR27	-2.03187	6.41943	-10.8598	7.96E-22	6.44523359354471e-19	38.9229364353592
TNFSF13	-3.34964	7.53157	-10.72	2.07E-21	1.53517829597333e-18	37.9886418832982
NCF4	-3.63543	8.79362	-10.6871	2.59E-21	1.77292850019166e-18	37.7690430017093
GNS	-2.08786	7.03644	-10.6763	2.79E-21	1.77292850019166e-18	37.6969462031687
C5AR1	-5.5233	6.33246	-10.6483	3.37E-21	2.00354995375005e-18	37.5098000634107
MYL6B	2.08427	10.0942	10.4008	1.81E-20	1.00832594025882e-17	35.8657123591125
MYO1F	-3.79358	8.25971	-10.3349	2.83E-20	1.48265663336638e-17	35.4292389466987
LTF	-7.11685	9.36353	-10.2371	5.47E-20	2.70902785845859e-17	34.7836929563991
CSF3R	-4.14741	7.02679	-10.2166	6.28E-20	2.94666058104402e-17	34.6485550442448
ADA	2.98357	10.9767	10.1516	9.74E-20	4.33662189524458e-17	34.2203925028813
ASAH1	-2.15748	8.65523	-10.1348	1.09E-19	4.62388092280582e-17	34.1099312407627
ACSL1	-4.55817	7.52214	-10.088	1.49E-19	5.83586355389692e-17	33.8028674241952
PLEK	-3.46566	8.48842	-10.0866	1.51E-19	5.83586355389692e-17	33.7932525534004
PLEKHO2	-1.94425	8.0459	-9.96352	3.44E-19	1.27525209502127e-16	32.9870602462046
NCF1	-3.92795	8.04587	-9.93259	4.22E-19	1.44829385954337e-16	32.7849447269593
ATG2A	-2.14981	8.49322	-9.93124	4.26E-19	1.44829385954337e-16	32.7761
FCER1G	-4.79486	8.11172	-9.92685	4.39E-19	1.44829385954337e-16	32.7474214166855
CD24	-4.004	10.1335	-9.8722	6.32E-19	2.01112628714689e-16	32.3907744738984
CEACAM8	-6.74815	7.57948	-9.80737	9.73E-19	2.99022699484216e-16	31.9685551337135
GCA	-4.6447	7.77118	-9.79668	1.05E-18	3.10358109713114e-16	31.8990174384146
CD63	-2.21263	10.6844	-9.684	2.21E-18	6.01398077269942e-16	31.1676244609856
PLBD1	-5.88582	7.8931	-9.68297	2.22E-18	6.01398077269942e-16	31.1609846535476
HLA-DMA	-3.68185	10.0169	-9.68266	2.23E-18	6.01398077269942e-16	31.1589403472884
MFSD1	-2.14592	9.77467	-9.62953	3.17E-18	8.29710127217704e-16	30.8150837858886
HCK	-3.53358	7.5515	-9.50973	6.98E-18	1.77681611308095e-15	30.0422288328621
CAP1	-1.59797	11.2595	-9.46581	9.32E-18	2.30618446175474e-15	29.7597566923112
DEFA4	-6.54989	9.65586	-9.42911	1.19E-17	2.85562586175901e-15	29.5240702416989
BST1	-3.4714	6.87681	-9.40263	1.41E-17	3.30802681722343e-15	29.3542449388119
S100A12	-6.83303	9.61415	-9.37253	1.72E-17	3.83405578421326e-15	29.1614313094512
ICAM1	-2.39462	6.74811	-9.37174	1.73E-17	3.83405578421326e-15	29.1563708111958
CSTA	-5.80513	8.20172	-9.36851	1.76E-17	3.83405578421326e-15	29.1357188314799
TYROBP	-4.76403	8.90747	-9.34839	2.01E-17	4.2697988569124e-15	29.0069466734578
TLR1	-2.76216	7.02642	-9.21567	4.79E-17	9.9176140675325e-15	28.1602724367821
IFNGR1	-2.43528	8.90181	-9.21101	4.93E-17	9.9904706749849e-15	28.1306520042157
TBK1	-2.09777	7.86471	-9.19995	5.30E-17	1.04974290307988e-14	28.0603159268411
NAMPT	-2.89192	8.796	-9.18839	5.72E-17	1.10712714839912e-14	27.9868237516427
BCL2A1	-4.76017	8.06155	-9.15754	6.99E-17	1.30682043889437e-14	27.7909133562003
PLAUR	-2.6997	7.56362	-9.15632	7.04E-17	1.30682043889437e-14	27.7831799173503
B4GALT5	-3.03734	8.1795	-9.13431	8.12E-17	1.47676240351146e-14	27.6435634607175
FPR1	-3.99358	5.89563	-9.10231	1.00E-16	1.78088161565604e-14	27.4408425526055
UGCG	-2.88004	8.61218	-9.09896	1.02E-16	1.78433631974644e-14	27.4195989861883
CTBS	-1.52254	7.37495	-9.09451	1.05E-16	1.80122840205791e-14	27.3914181064169
S100P	-6.02489	8.27301	-9.05512	1.36E-16	2.24893924808128e-14	27.1423437747322
LILRA2	-2.83216	7.72112	-9.05437	1.36E-16	2.24893924808128e-14	27.1376358093641
GPR65	-3.40189	7.36549	-9.0293	1.60E-16	2.59645178342646e-14	26.9793176314437
LCN2	-6.21436	8.84582	-8.96876	2.37E-16	3.76841798153282e-14	26.5977751098035
APP	-2.2112	7.83506	-8.95032	2.67E-16	4.16906627883008e-14	26.4817776326027
LYN	-3.44537	8.55645	-8.89651	3.77E-16	5.79069158532891e-14	26.1438254823049
CFP	-4.30836	7.28186	-8.88985	3.93E-16	5.94106238352578e-14	26.1020848508962
HMGCS1	1.89016	7.36293	8.83691	5.53E-16	8.20328903290624e-14	25.7705115360929
LILRA6	-1.997	7.21723	-8.83223	5.69E-16	8.3138416749136e-14	25.7412915488998
PTX3	-4.60474	6.19283	-8.78783	7.56E-16	1.08660153954265e-13	25.4639304276217
FCN1	-5.68553	8.19377	-8.77157	8.39E-16	1.1863934285501e-13	25.3624926970794
MNDA	-5.47722	7.90715	-8.7401	1.03E-15	1.4275259553071e-13	25.1664164217568
ROGDI	-2.19223	7.60382	-8.7376	1.04E-15	1.42811723754885e-13	25.150870981017
NPC2	-2.03571	10.2352	-8.71211	1.23E-15	1.65442782100534e-13	24.9923123379947
APMAP	-2.3612	9.72953	-8.70442	1.29E-15	1.71147018822645e-13	24.9445257569093
MZB1	2.64839	10.7547	8.61566	2.26E-15	2.96308980864292e-13	24.3941129798898
IFNGR2	-2.02488	9.41017	-8.56587	3.10E-15	3.98496789938209e-13	24.0865343262059
CCPG1	-2.71525	5.65599	-8.56425	3.13E-15	3.98496789938209e-13	24.076535208052
CLC	-5.48024	7.78285	-8.53662	3.73E-15	4.67789103976903e-13	23.9061797537664
ALOX5AP	-3.67305	10.204	-8.47947	5.35E-15	6.61319098132694e-13	23.5545650865096
LYZ	-4.38541	10.9821	-8.46856	5.72E-15	6.98577536519367e-13	23.4876027941426
TSPO	-3.34206	10.0633	-8.43539	7.05E-15	8.48855134688455e-13	23.2841493640843
CXCL1	-3.38122	5.72423	-8.4022	8.68E-15	1.03139560984999e-12	23.0809496179005
PYGL	-3.61183	6.96647	-8.3673	1.08E-14	1.26637184787002e-12	22.8677267748932
SOX4	1.86653	10.0365	8.31929	1.46E-14	1.68718605106374e-12	22.5750045507622
ANXA3	-5.49731	7.07249	-8.31037	1.54E-14	1.76079508665651e-12	22.5207462307465
GRSF1	1.21721	7.99694	8.29947	1.65E-14	1.85910692696362e-12	22.4543930491697
SEPT6	1.68175	9.78278	8.2976	1.67E-14	1.85910692696362e-12	22.4430310306079
CTSA	-2.15241	8.87955	-8.27835	1.88E-14	2.07006299442589e-12	22.3260405019118
DOK3	-2.34922	7.06095	-8.22239	2.67E-14	2.89534785824671e-12	21.9867282318001
MMP9	-5.14346	8.53466	-8.21979	2.71E-14	2.90707343327362e-12	21.9709606059362
G0S2	-4.77031	7.95612	-8.19777	3.11E-14	3.29282457592523e-12	21.8377301508895
GALC	-1.74087	7.29131	-8.17717	3.53E-14	3.69676275422524e-12	21.7133137337724
GYG1	-2.83373	9.4568	-8.16501	3.80E-14	3.93943740447534e-12	21.6398873654505
ZNF22	1.46805	10.016	8.1314	4.68E-14	4.79320627270713e-12	21.4372814852802
EFHD2	-1.99974	9.2075	-8.11962	5.03E-14	5.09595696923068e-12	21.3663989975949
HLA-DRA	-3.67362	11.7808	-8.11415	5.21E-14	5.21160787650218e-12	21.3334921346224
MMP8	-5.75737	7.16864	-8.04151	8.14E-14	8.05938122172054e-12	20.8974607682215
MSMO1	2.28532	8.05838	8.03624	8.41E-14	8.23304738391322e-12	20.8658975316047
RGS19	-2.03619	9.80127	-8.03424	8.51E-14	8.24397365480534e-12	20.8539475053483
S100A9	-4.95617	11.537	-8.02974	8.75E-14	8.38407272556367e-12	20.8269745686169
NINJ1	-2.25138	8.54347	-8.00227	1.04E-13	9.81678080222095e-12	20.6627244437338
TNFRSF1B	-2.7377	8.09903	-7.95861	1.35E-13	1.26879148617199e-11	20.4022780381703
SLC15A3	-3.34087	6.42095	-7.95085	1.42E-13	1.31656063748854e-11	20.3560402569041
AQP9	-4.00046	6.25694	-7.94814	1.44E-13	1.32469859350534e-11	20.3399306067773
GABARAP	-1.07083	12.0287	-7.90528	1.87E-13	1.70300007524201e-11	20.0850551426559
GPR97	-2.84304	6.57492	-7.87858	2.20E-13	1.98325305874189e-11	19.9266652651867
EHD1	-1.6746	7.92892	-7.85423	2.56E-13	2.27654534717748e-11	19.782446806104
CKAP4	-2.57597	8.22077	-7.83457	2.88E-13	2.53955905834981e-11	19.6661974008521
ATP6V0D1	-1.58468	10.0984	-7.82808	2.99E-13	2.61560082276492e-11	19.6278436632422
REEP5	-1.50135	8.85522	-7.80094	3.53E-13	3.0529515515224e-11	19.4676649273068
RAB31	-4.21349	7.25618	-7.7965	3.63E-13	3.10590168852911e-11	19.4414940218035
HLA-DPA1	-3.26491	10.047	-7.79171	3.73E-13	3.16692252765735e-11	19.4132103664105
ELANE	-5.73002	9.05977	-7.73694	5.20E-13	4.36634903298392e-11	19.0910462148952
CAMP	-5.6218	9.02409	-7.73412	5.28E-13	4.39974492916936e-11	19.0744748532895
CEBPD	-3.42785	6.1101	-7.72925	5.44E-13	4.48877954805288e-11	19.0458935288799
FLOT2	-1.72894	7.4931	-7.71114	6.07E-13	4.9597754139421e-11	18.9397073985617
HCAR3	-4.06449	6.48527	-7.70927	6.14E-13	4.97022636632216e-11	18.9287600490059
TPP1	-1.49203	8.44353	-7.70526	6.29E-13	5.04573370497759e-11	18.9052555159396
VASP	-1.80295	8.71169	-7.69223	6.80E-13	5.40811748928839e-11	18.8289533340344
SIRPA	-1.88739	6.25595	-7.68073	7.29E-13	5.74387204040646e-11	18.7616210267752
KHDRBS1	0.871073	10.1333	7.64289	9.14E-13	7.14390027602649e-11	18.5405762515175
FCAR	-3.58785	5.20359	-7.58471	1.29E-12	1.00273774189976e-10	18.2018632299213
LPGAT1	-1.62573	8.56437	-7.57234	1.39E-12	1.07019215630798e-10	18.1300351770934
NAGA	-1.40094	7.1441	-7.48795	2.30E-12	1.74150802544551e-10	17.6416814530033
FTL	-1.33846	12.8142	-7.48754	2.31E-12	1.74150802544551e-10	17.6393239399419
IRS2	-3.12462	10.2073	-7.45595	2.78E-12	2.08197243380119e-10	17.4572905889688
RHBDF2	-1.84559	7.2728	-7.44607	2.95E-12	2.18873973853036e-10	17.4004677661648
IVNS1ABP	-1.699	8.63037	-7.4131	3.58E-12	2.63694451716763e-10	17.2110737883851
PTGS2	-4.75672	5.14286	-7.38833	4.14E-12	3.0260888028206e-10	17.069106042831
CST7	-3.542	8.85296	-7.38095	4.33E-12	3.13467651406861e-10	17.0268547592006
HEXB	-1.55037	9.35018	-7.37876	4.38E-12	3.149846722843e-10	17.0142773744023
OLFM4	-5.27985	6.6789	-7.37097	4.59E-12	3.27109829174357e-10	16.9697059736195
TRIT1	1.00961	8.31468	7.35887	4.93E-12	3.4841994027813e-10	16.9005409127432
FCGR3B	-3.54406	6.9555	-7.3373	5.59E-12	3.92295692845892e-10	16.777445496005
GNG10	-1.39507	10.2403	-7.33352	5.72E-12	3.9795809032216e-10	16.7558714435704
SPI1	-2.90289	5.80329	-7.30132	6.90E-12	4.76792961753419e-10	16.5724667073353
FBXL5	-1.22122	9.65328	-7.27964	7.84E-12	5.37020106303321e-10	16.4492398577159
SLC16A6	-1.88277	5.46273	-7.27331	8.13E-12	5.49495226135287e-10	16.4133
CPNE3	-2.0069	8.95377	-7.27309	8.14E-12	5.49495226135287e-10	16.4120506138986
BIN3	-0.981063	8.42156	-7.26954	8.31E-12	5.56760838990682e-10	16.391932238888
MPO	-4.69716	8.89393	-7.24859	9.39E-12	6.24387523635496e-10	16.2731450968141
CTSB	-1.52144	8.22833	-7.20075	1.24E-11	8.18496616037453e-10	16.0026528934244
AZU1	-5.26266	7.98854	-7.19867	1.26E-11	8.2234631941487e-10	15.9909132495816
STOM	-2.78077	8.19455	-7.19667	1.27E-11	8.2588170462238e-10	15.9796176086374
MAN2B1	-1.36888	8.86057	-7.19308	1.30E-11	8.35979111131701e-10	15.9593352696485
PRG2	-4.26734	7.63626	-7.19159	1.31E-11	8.35979111131701e-10	15.9509255863035
ATP6V0B	-1.34428	10.7471	-7.19084	1.31E-11	8.35979111131701e-10	15.946737013554
CTSD	-2.09602	7.55267	-7.17883	1.41E-11	8.89931459307939e-10	15.8790031655812
GYS1	-1.41251	8.12043	-7.15546	1.61E-11	1.01109776261404e-09	15.7474829736761
HMGN4	1.0455	10.4683	7.15434	1.62E-11	1.01109776261404e-09	15.7411968051297
LY86	-2.4393	8.89542	-7.14658	1.70E-11	1.05012024141603e-09	15.6976049098676
TREM1	-4.02659	5.97191	-7.14087	1.75E-11	1.07788227028564e-09	15.6655083530607
PPBP	-6.12678	6.40085	-7.12528	1.92E-11	1.17132679866856e-09	15.5780019175749
G6PD	-2.05577	7.81596	-7.11371	2.05E-11	1.24363949057064e-09	15.5131319258383
AP3S1	-1.29548	11.0974	-7.0932	2.31E-11	1.39010572297133e-09	15.3983163974422
LRP10	-1.52169	8.89499	-7.07832	2.52E-11	1.50423257446695e-09	15.3150794226163
IL10RA	-2.70077	8.06879	-7.07139	2.62E-11	1.5548466762847e-09	15.2764131219578
VEGFA	-1.61749	6.71562	-7.06404	2.73E-11	1.61120523735134e-09	15.2353503122896
FOXO3	-1.359	9.10143	-7.04407	3.06E-11	1.79490746773283e-09	15.1240048286204
ORM1	-4.32709	6.43416	-7.01887	3.54E-11	2.06001030979333e-09	14.9837673864058
SYK	-1.74638	8.16073	-7.00364	3.86E-11	2.23289783865821e-09	14.8991320233114
CYTIP	-3.39414	8.89465	-6.99833	3.98E-11	2.28684557983827e-09	14.8696476848013
TLR2	-2.64109	7.09108	-6.99152	4.14E-11	2.36230802768453e-09	14.8318561467341
MS4A3	-4.84633	7.82865	-6.98891	4.20E-11	2.38246948581659e-09	14.8173912071525
OAZ1	-0.937802	12.9745	-6.9874	4.24E-11	2.38405364778642e-09	14.8090543287072
ARRB2	-1.88927	8.50162	-6.98657	4.26E-11	2.38405364778642e-09	14.8044470399033
S100A8	-2.86146	9.40275	-6.98146	4.38E-11	2.43930946461517e-09	14.7760951574237
FGR	-3.24176	8.05623	-6.97715	4.49E-11	2.48446662226718e-09	14.7522214214278
NKG7	-3.03387	9.25337	-6.9642	4.83E-11	2.65602679712116e-09	14.6804922310199
B2M	-0.601147	13.3531	-6.96327	4.86E-11	2.65602679712116e-09	14.6753586050138
ADM	-2.96574	6.97858	-6.95974	4.96E-11	2.69334018327442e-09	14.6558646155909
PRTN3	-4.62638	6.72669	-6.93304	5.77E-11	3.11608454388931e-09	14.5083375730144
CNN2	-1.96936	8.82373	-6.9143	6.42E-11	3.44504444501368e-09	14.404992059338
C16orf80	1.52393	10.7522	6.89245	7.27E-11	3.87591488204729e-09	14.2847100023335
OGFRL1	-2.02747	7.38218	-6.86273	8.60E-11	4.55818444260876e-09	14.121461291757
PFKFB3	-3.09118	9.06502	-6.8556	8.95E-11	4.70203797419522e-09	14.0823647340521
SLC7A7	-2.31273	7.54512	-6.85513	8.97E-11	4.70203797419522e-09	14.0798003228788
RAB27A	-2.13744	8.42705	-6.84702	9.39E-11	4.89356603452723e-09	14.0353404317761
RETN	-3.82657	8.0575	-6.83394	1.01E-10	5.23739646493486e-09	13.9637523534839
QPCT	-3.91803	6.20566	-6.82043	1.09E-10	5.61882183311336e-09	13.8898772679945
HEBP1	-2.00818	8.56054	-6.80981	1.16E-10	5.93058185001414e-09	13.8318598338715
MYB	1.42359	9.46494	6.79426	1.26E-10	6.43518633996915e-09	13.7470300577388
CDK6	2.0427	8.42493	6.77375	1.42E-10	7.17910339278557e-09	13.6353189671554
RIPK2	-1.45112	7.2135	-6.75879	1.54E-10	7.74437992379045e-09	13.5540153609955
PTPN12	-1.80133	7.07443	-6.7582	1.55E-10	7.74437992379045e-09	13.5507922870617
DUSP14	1.38376	7.6371	6.7564	1.56E-10	7.77905872454093e-09	13.5410191935231
ACOT9	-1.54936	8.24932	-6.73962	1.72E-10	8.49727588737355e-09	13.4499118744822
TFF3	-2.14587	6.1046	-6.7372	1.74E-10	8.56536499745395e-09	13.4367907415624
YWHAQ	0.791953	12.3917	6.7287	1.82E-10	8.93242773254825e-09	13.390725804108
SCO2	-1.98542	7.81654	-6.72765	1.84E-10	8.93600021519806e-09	13.3850207695961
MTF1	-1.01471	7.49651	-6.72527	1.86E-10	9.0061707568494e-09	13.372142823587
FRAT1	-1.30692	7.88609	-6.7194	1.92E-10	9.25590153363534e-09	13.3403438651295
PRKAR2A	-0.987285	8.64505	-6.71222	2.00E-10	9.58264364890514e-09	13.3014516061533
TCN1	-4.47934	7.70186	-6.71052	2.02E-10	9.62195344189598e-09	13.2922769784438
EVI2B	-2.00506	9.94051	-6.66376	2.62E-10	1.241452475582e-08	13.039889601295
SIPA1	-1.56876	8.39067	-6.66262	2.64E-10	1.24274645268225e-08	13.0337330122495
MAP3K5	-1.83177	6.53068	-6.65375	2.77E-10	1.29858150760876e-08	12.9859839215809
THAP1	1.22901	7.56716	6.62435	3.26E-10	1.52036496665784e-08	12.8279602280077
S100A11	-3.42252	7.64306	-6.62337	3.28E-10	1.52064816286478e-08	12.8227152274589
SNX3	-1.15928	10.8413	-6.61671	3.40E-10	1.56952755655417e-08	12.7869946027475
GSAP	-2.49226	7.74519	-6.61163	3.50E-10	1.60585778589769e-08	12.7597911096693
HN1	1.71895	9.70706	6.60644	3.60E-10	1.64410897680035e-08	12.7319769013127
CD14	-4.16913	6.2496	-6.60357	3.66E-10	1.66191618398845e-08	12.7165701078288
RHOG	-1.48633	9.73034	-6.59693	3.79E-10	1.71523771771483e-08	12.6810116787204
SLC31A2	-2.21896	6.89719	-6.58704	4.01E-10	1.80226976076635e-08	12.6281086746133
BLVRB	-2.74493	8.32252	-6.57683	4.24E-10	1.89700797946917e-08	12.5735501972337
TSG101	-1.12568	9.50984	-6.57588	4.26E-10	1.89743639897092e-08	12.5684712238027
CRISP3	-6.06367	6.4859	-6.54682	5.00E-10	2.21530528281889e-08	12.4134743763614
ZNF304	1.50171	6.95896	6.54288	5.11E-10	2.25254109627444e-08	12.3925046804142
MED17	1.33846	8.77646	6.53906	5.22E-10	2.28897482982939e-08	12.3721637496926
NPTN	-1.4086	9.9879	-6.52947	5.50E-10	2.39951239467498e-08	12.3211204714105
RNASE2	-4.15959	8.89092	-6.52868	5.52E-10	2.39951239467498e-08	12.3169
AMPD2	-1.19286	9.41181	-6.52343	5.68E-10	2.45757689241092e-08	12.2890514208552
2025-03-02	-1.74183	7.08524	-6.51923	5.82E-10	2.50007980836921e-08	12.2667317590503
PSTPIP1	-1.80009	7.26748	-6.51854	5.84E-10	2.50007980836921e-08	12.263066435966
EPX	-2.29367	6.18252	-6.51267	6.03E-10	2.5695084115887e-08	12.2318682761399
MID1IP1	-1.64168	8.8717	-6.5101	6.11E-10	2.59349083998856e-08	12.2182376702253
TRAK2	-1.56345	7.70927	-6.50623	6.24E-10	2.63639233233166e-08	12.1977319767079
CCR1	-2.37909	6.34216	-6.5049	6.29E-10	2.64326290126907e-08	12.190627043828
ABCC1	1.29148	8.82314	6.50085	6.43E-10	2.68974829002564e-08	12.1691701007707
LY96	-2.41366	7.48984	-6.4835	7.07E-10	2.93281027134743e-08	12.077240535958
MSRB1	-2.47098	8.47183	-6.48331	7.08E-10	2.93281027134743e-08	12.0762714374089
ABI2	1.04768	7.44745	6.44962	8.51E-10	3.50805174666572e-08	11.8982326727721
RNASE3	-4.18817	8.2917	-6.44868	8.55E-10	3.50988419083726e-08	11.8932515407782
IL18RAP	-3.0412	6.57779	-6.43457	9.23E-10	3.7724557096402e-08	11.8189027441454
INPP5D	-1.41199	8.19487	-6.43031	9.45E-10	3.84331363955406e-08	11.7964412446469
SLC22A4	-2.75736	5.9517	-6.42568	9.69E-10	3.9233866730512e-08	11.7720518388485
SLC25A37	-2.09908	7.23988	-6.41975	1.00E-09	4.03336993083934e-08	11.7408762989683
IL1RN	-1.86341	5.62157	-6.40738	1.07E-09	4.29394794801948e-08	11.6758602437086
ALOX5	-2.29046	7.40589	-6.40422	1.09E-09	4.34851304584746e-08	11.6592757023265
PPT1	-1.26338	10.3362	-6.39271	1.16E-09	4.60782870909923e-08	11.5988391292538
LCK	2.85667	9.57356	6.38586	1.20E-09	4.76058220600283e-08	11.5629382015829
HSD17B11	-1.4774	10.0333	-6.38502	1.21E-09	4.76115877266291e-08	11.558525985864
DYSF	-2.37035	7.81456	-6.38276	1.22E-09	4.7986356732928e-08	11.5466565176107
SRGN	-2.81199	11.4115	-6.38146	1.23E-09	4.81110831148098e-08	11.5398854131553
BTK	-1.6536	8.74515	-6.36409	1.35E-09	5.26172129542888e-08	11.4489430195461
VNN2	-3.07099	6.5022	-6.35884	1.39E-09	5.3896023602511e-08	11.4214699106173
IQSEC1	-1.21547	8.13525	-6.35337	1.43E-09	5.52686424927685e-08	11.3929163678062
PRKCD	-2.27327	6.96443	-6.35147	1.45E-09	5.5597244596419e-08	11.3829935336016
TMBIM4	-1.07317	9.55861	-6.32896	1.63E-09	6.24991190253166e-08	11.2655273698566
RIOK3	-1.15174	9.04972	-6.32766	1.65E-09	6.26684650837721e-08	11.2587612916615
ALDH2	-2.2108	8.28433	-6.31459	1.77E-09	6.69443564521779e-08	11.1907336605596
ARPC1B	-1.60436	10.66	-6.28499	2.07E-09	7.80494966971386e-08	11.036923019393
PGS1	-0.788507	8.47582	-6.28442	2.08E-09	7.80494966971386e-08	11.0339622393709
CNOT6	1.45114	8.71197	6.2772	2.16E-09	8.07852309977669e-08	10.996542853488
GPR183	-3.13142	6.99524	-6.25715	2.40E-09	8.95570467022075e-08	10.8927239316133
MANBA	-1.16388	7.92674	-6.23588	2.69E-09	9.99079710058507e-08	10.7828473553395
CAST	-1.4441	7.63332	-6.22663	2.83E-09	1.04520566212223e-07	10.7351539581805
CEACAM6	-3.88924	8.27777	-6.22119	2.91E-09	1.07151284738792e-07	10.707097356999
CD93	-2.30799	7.26992	-6.21335	3.03E-09	1.11255361512902e-07	10.6667439977424
SGMS1	-1.32759	5.87334	-6.18128	3.60E-09	1.31378181984814e-07	10.5019486525777
NRGN	-2.60523	6.92647	-6.17139	3.79E-09	1.37890141253915e-07	10.4512019962667
TOX	2.42958	7.82589	6.14854	4.28E-09	1.54443553242875e-07	10.3342602266546
YTHDF2	0.883544	10.7119	6.14843	4.28E-09	1.54443553242875e-07	10.3336980218059
STK10	-1.13219	8.49155	-6.14662	4.32E-09	1.55296486051204e-07	10.3244651041124
CD55	-2.19817	8.7642	-6.14014	4.47E-09	1.6006408096368e-07	10.2913338337019
PYCARD	-1.68056	9.3841	-6.13367	4.63E-09	1.64958124392677e-07	10.2583363753061
AK055981	1.35652	7.70257	6.13135	4.69E-09	1.6604033942413e-07	10.246486888468
LIMK2	-1.15586	6.74732	-6.13092	4.70E-09	1.6604033942413e-07	10.2443090544303
SLC9A8	-1.13508	7.51038	-6.12744	4.78E-09	1.68447051351587e-07	10.2265654746262
IFITM2	-1.89472	11.7583	-6.11935	4.99E-09	1.75094996687562e-07	10.1853271596773
ST13	1.03046	10.2152	6.11796	5.03E-09	1.7569882752825e-07	10.1781997960741
MFSD10	-1.36812	8.3833	-6.09822	5.58E-09	1.93542024789277e-07	10.0777554532803
LAPTM5	-1.71258	12.574	-6.0981	5.58E-09	1.93542024789277e-07	10.077139503281
APLP2	-1.83515	8.14235	-6.08171	6.09E-09	2.10123255354051e-07	9.99392907986181
UBE2B	-0.739629	8.4762	-6.07774	6.21E-09	2.13721622290867e-07	9.97377774768178
MYD88	-1.0274	10.6139	-6.07611	6.27E-09	2.14733385565901e-07	9.96548829337064
GBP2	-2.40606	7.23894	-6.07076	6.45E-09	2.19992671581997e-07	9.93839123138895
PXN	-1.32193	6.99464	-6.06402	6.68E-09	2.2703597438948e-07	9.90423763906428
CYBA	-1.43884	10.3807	-6.05815	6.89E-09	2.33230685863834e-07	9.87454012468387
ASL	-1.49262	7.00246	-6.05332	7.06E-09	2.38302258226403e-07	9.85008370876825
FES	-1.46811	7.19829	-6.04801	7.26E-09	2.44089441057728e-07	9.8232425559366
CRY1	1.47431	9.68529	6.03532	7.76E-09	2.59855227630086e-07	9.75912268100967
TTF1	1.14819	9.06566	6.03224	7.89E-09	2.63071224090687e-07	9.7436121198621
PRKRA	0.963987	9.39924	6.02995	7.98E-09	2.65241927923096e-07	9.73206012254469
IGHM	-2.01273	8.49112	-6.02848	8.04E-09	2.66302195566391e-07	9.72460699981449
COTL1	-2.64962	8.86763	-6.02536	8.17E-09	2.6966734499344e-07	9.70888901476868
MAGED1	1.5236	10.9236	6.02262	8.29E-09	2.72544503697309e-07	9.69506346709344
CFD	-3.14843	6.51734	-6.01267	8.73E-09	2.85993887399618e-07	9.64496814936251
CD99	2.47127	12.0289	6.01133	8.79E-09	2.86950059638762e-07	9.63819832136116
PIK3R5	-1.22341	6.94413	-6.00655	9.02E-09	2.93102908797552e-07	9.61417049076246
PGLYRP1	-4.72666	7.16665	-6.00004	9.33E-09	3.02112991901062e-07	9.58140267547728
CYBB	-2.00773	6.72039	-5.99909	9.37E-09	3.02503981497685e-07	9.57664696291445
FPR2	-2.13499	5.44453	-5.99647	9.50E-09	3.0555040836095e-07	9.56347387001752
ZNF329	1.37885	7.93811	5.98658	1.00E-08	3.20513547529607e-07	9.51381167510258
TUBA4A	-2.14107	9.7079	-5.98574	1.00E-08	3.2076624329366e-07	9.50958222282299
ATP2C1	1.24687	7.62576	5.97966	1.04E-08	3.28856456004049e-07	9.47904486310274
CA2	-3.7344	7.26514	-5.97957	1.04E-08	3.28856456004049e-07	9.47862438557971
ZYX	-1.90174	7.92637	-5.95688	1.17E-08	3.68611282985293e-07	9.36497860339587
ELF4	-1.47294	8.20172	-5.95294	1.19E-08	3.74891147572085e-07	9.34524711672658
AMPD3	-1.77215	8.37004	-5.95101	1.20E-08	3.77316536647123e-07	9.33561369391984
CSGALNACT1	-2.29755	8.54743	-5.94938	1.21E-08	3.79191361118281e-07	9.32743331041332
ITGAE	1.20194	11.2617	5.94603	1.23E-08	3.84460070125501e-07	9.31072655689406
LSP1	-2.60742	8.20403	-5.92805	1.35E-08	4.19028589416339e-07	9.22096171675727
ADIPOR1	-1.34425	9.43584	-5.92803	1.35E-08	4.19028589416339e-07	9.22086565132257
CTSG	-4.12095	9.19054	-5.92378	1.38E-08	4.26846313241525e-07	9.19967277996144
CCNB1IP1	1.08917	10.2744	5.91924	1.42E-08	4.35453568544101e-07	9.17706405861467
HCLS1	-1.49239	10.6268	-5.91698	1.43E-08	4.39032882304589e-07	9.16583791063326
PSTPIP2	-2.5374	7.18881	-5.91344	1.46E-08	4.45602449839747e-07	9.1481874879538
CLEC4A	-2.46627	6.58778	-5.90814	1.50E-08	4.56366766369742e-07	9.12184471892345
PASK	-1.10273	7.31875	-5.9038	1.54E-08	4.65105968190709e-07	9.10024530278935
AHSP	-3.42523	7.84852	-5.88413	1.70E-08	5.1289544640403e-07	9.00256284789081
XPO6	-0.753764	8.93201	-5.87849	1.75E-08	5.26202616084097e-07	8.97457579423647
FBP1	-2.08761	6.01942	-5.86179	1.90E-08	5.71332590986773e-07	8.89191270727203
GLO1	1.03632	10.771	5.84367	2.09E-08	6.24782234411013e-07	8.80237636062861
CPD	-1.24805	6.78827	-5.84261	2.10E-08	6.26084098001214e-07	8.79713576514543
CYP4F3	-4.13477	6.15836	-5.83376	2.20E-08	6.49858199657427e-07	8.75348045771999
S100A4	-2.76305	10.854	-5.83344	2.20E-08	6.49858199657427e-07	8.75189407020533
IPO7	1.09182	9.48325	5.83337	2.20E-08	6.49858199657427e-07	8.75154662768728
SDC4	-1.30194	5.76188	-5.82889	2.25E-08	6.60986877136597e-07	8.72943368673182
ARHGAP25	-1.25323	8.33662	-5.82876	2.26E-08	6.60986877136597e-07	8.72879769117081
RPS29	0.448639	13.0037	5.82684	2.28E-08	6.65293559219227e-07	8.7193642977303
IL1B	-2.72704	8.96781	-5.8245	2.31E-08	6.71106115829866e-07	8.70781478498137
LGALS3	-2.65649	7.8983	-5.82167	2.34E-08	6.78645193015437e-07	8.69389086304366
PLAC8	-1.8137	11.5119	-5.8176	2.39E-08	6.90622973301214e-07	8.67387673493046
RPS15A	0.528568	12.5188	5.8167	2.40E-08	6.91551851075387e-07	8.66945336687623
HLA-F	-1.46882	10.5188	-5.80394	2.56E-08	7.35664486250667e-07	8.60669147611487
SEC11A	-0.847752	10.7291	-5.80035	2.61E-08	7.46825155432595e-07	8.58906262805574
PARP2	0.982588	8.29117	5.79611	2.66E-08	7.60681179341385e-07	8.56823619707875
PICALM	-1.00813	7.61904	-5.78747	2.78E-08	7.92286815756741e-07	8.52588909155945
VCAN	-3.35235	5.89331	-5.77949	2.90E-08	8.22456974411853e-07	8.48677227619144
CCT7	1.00104	10.6148	5.77076	3.03E-08	8.57002847760666e-07	8.44403029916159
RXRA	-1.47589	6.96419	-5.76803	3.07E-08	8.66220754349538e-07	8.43065802067941
TMEM127	-1.07976	8.29937	-5.75828	3.23E-08	9.07219461983871e-07	8.38302276199529
SCPEP1	-1.7299	7.87584	-5.74224	3.50E-08	9.80873318387314e-07	8.30473037591984
TCIRG1	-1.87478	8.51141	-5.74082	3.53E-08	9.84854955029351e-07	8.29779832529923
RNF13	-1.0251	8.58366	-5.73283	3.67E-08	1.02222575073478e-06	8.25887938702567
MGAT1	-1.11582	8.84612	-5.7251	3.82E-08	1.05960954216929e-06	8.22124979237482
RNF19B	-1.50649	7.72747	-5.71952	3.93E-08	1.08650210649556e-06	8.1940945534975
TASP1	1.98404	7.56643	5.71459	4.03E-08	1.10841279876775e-06	8.17015860964127
SLC11A1	-1.17202	6.08048	-5.71428	4.03E-08	1.10841279876775e-06	8.16864566238377
MRPL15	1.13484	9.53504	5.71372	4.04E-08	1.10841279876775e-06	8.16591335253006
METAP1	0.993773	9.20661	5.71034	4.11E-08	1.12398013836081e-06	8.14951066237328
TSPAN32	-1.39227	6.9281	-5.70502	4.23E-08	1.15100179405226e-06	8.12366375117475
PPIF	-1.71563	8.32168	-5.6717	5.00E-08	1.35467602824123e-06	7.96227886769898
GORASP2	0.877137	9.62244	5.67139	5.00E-08	1.35467602824123e-06	7.9607931597532
PDE4B	-2.61246	7.91427	-5.66886	5.07E-08	1.36782743002252e-06	7.94856131293256
OSBPL2	-0.719056	7.7173	-5.66683	5.12E-08	1.37762638283222e-06	7.93876921637341
SEPW1	1.86081	9.84846	5.66381	5.20E-08	1.3834199151257e-06	7.92417613970177
RHOQ	-1.02323	7.63657	-5.66375	5.20E-08	1.3834199151257e-06	7.92386573771227
DPEP2	-1.98105	6.74525	-5.66368	5.20E-08	1.3834199151257e-06	7.92356553592169
CCL4	-2.70661	7.81577	-5.6636	5.20E-08	1.3834199151257e-06	7.92315397685798
IMPA2	-2.33557	7.50295	-5.662	5.24E-08	1.39042622466963e-06	7.9154159439924
MKRN1	-0.987542	9.53996	-5.65944	5.31E-08	1.40404707034111e-06	7.90307785419825
HMOX1	-2.37033	6.32257	-5.65887	5.33E-08	1.40404707034111e-06	7.90030765381851
CORO7	-1.07896	7.58856	-5.65262	5.50E-08	1.44438046047729e-06	7.87017960374021
SERPINB1	-1.82312	9.70568	-5.64785	5.63E-08	1.47493569561954e-06	7.84717767908801
SOCS5	1.41178	7.84795	5.64518	5.71E-08	1.49033950519389e-06	7.83434139363166
FUBP3	1.0029	8.7809	5.64048	5.84E-08	1.52136197783208e-06	7.81167727832011
ZNF32	1.25223	8.65612	5.6391	5.88E-08	1.5274038599387e-06	7.80504762593687
DEGS1	-1.41324	8.58446	-5.63488	6.01E-08	1.55537091714792e-06	7.78476797808315
FCGRT	-1.89738	8.58107	-5.6337	6.04E-08	1.56002597671547e-06	7.77909408817595
KLHL2	-2.24263	7.81111	-5.63156	6.11E-08	1.57228862223669e-06	7.76876563435403
IL6	-1.98862	5.81627	-5.63065	6.13E-08	1.57465815379715e-06	7.76440380165758
RCBTB2	2.11185	9.22925	5.6301	6.15E-08	1.57465815379715e-06	7.76176
SLC2A3	-2.3022	8.83362	-5.61974	6.48E-08	1.65341178226074e-06	7.71200233322364
SUN2	-1.11087	9.7417	-5.61355	6.68E-08	1.70037854107547e-06	7.68227451909904
ALG9	0.899031	7.52636	5.61248	6.72E-08	1.70463268884038e-06	7.67712108439699
RPLP0	0.335704	14.0113	5.60703	6.90E-08	1.74654457782475e-06	7.65099313704136
SERPINB2	-3.26504	5.47175	-5.60309	7.04E-08	1.77602341255447e-06	7.63214572926517
MKNK2	-1.30901	11.6415	-5.59939	7.17E-08	1.80393640923744e-06	7.61440738535983
MARCKS	-3.24152	7.36327	-5.59524	7.32E-08	1.83639843105477e-06	7.59451997459086
ZAP70	1.90342	8.82137	5.57529	8.08E-08	2.02186348951733e-06	7.49918888870292
PTPRE	-1.8855	9.20378	-5.57221	8.20E-08	2.04720620431084e-06	7.48449845896354
PILRA	-1.49062	6.0294	-5.57147	8.23E-08	2.0490480332474e-06	7.48094035719814
KIAA0247	-1.23981	9.50037	-5.56564	8.48E-08	2.10318692806539e-06	7.45315400617887
CD83	-2.10633	9.12075	-5.55139	9.10E-08	2.25062120119133e-06	7.38526877187268
HLA-A	-0.890988	13.5013	-5.54804	9.25E-08	2.28191057717084e-06	7.36931205416662
LITAF	-1.86	8.52101	-5.54675	9.31E-08	2.29018635981795e-06	7.36316615359408
TMX4	-1.26958	7.75523	-5.54316	9.47E-08	2.32474820419939e-06	7.34609728653336
GNA15	2.07898	10.852	5.52524	1.03E-07	2.5326596404734e-06	7.26102772222501
PIK3CD	-1.11621	8.43171	-5.51999	1.06E-07	2.59190826068278e-06	7.23613976899652
MXI1	-1.65818	9.56724	-5.51755	1.07E-07	2.61614869572579e-06	7.22455161065619
RTN4	0.869444	11.6508	5.51252	1.10E-07	2.6744232711479e-06	7.20073226138321
CDC42EP3	-2.22174	7.27811	-5.50185	1.16E-07	2.81076681364949e-06	7.15028177722385
CSRNP2	1.16936	7.38722	5.49729	1.19E-07	2.86670278874034e-06	7.12871694263465
RAB13	-2.00629	9.12816	-5.49553	1.20E-07	2.88372006081323e-06	7.12038750036145
CD3D	3.04918	10.3043	5.49499	1.20E-07	2.88372006081323e-06	7.11782464588582
RCN1	1.47144	8.29101	5.49438	1.20E-07	2.88450471427317e-06	7.11497383736967
LY75	-1.56578	8.09087	-5.4886	1.24E-07	2.95273287047008e-06	7.08769205084151
TALDO1	-1.281	11.5881	-5.48853	1.24E-07	2.95273287047008e-06	7.08733099511091
BASP1	-2.5694	8.36703	-5.47301	1.34E-07	3.17763410612672e-06	7.01416650410373
DAZAP2	-0.731553	10.7509	-5.46925	1.36E-07	3.22810113953913e-06	6.99645287494724
HP	-2.97577	7.87116	-5.4648	1.39E-07	3.29038091099512e-06	6.97552338669316
ANXA4	-1.94033	8.19981	-5.45844	1.44E-07	3.38538442513716e-06	6.94560662129154
GTF3A	0.940056	11.994	5.45749	1.44E-07	3.39212860276597e-06	6.94115272724298
PAIP1	0.900939	9.24493	5.45101	1.49E-07	3.49209693283265e-06	6.91069330139381
VPS8	-0.79472	7.34951	-5.44505	1.53E-07	3.58568015862532e-06	6.88274112497392
IER3	-2.39553	8.71298	-5.44093	1.56E-07	3.64891255945095e-06	6.86341543249032
NCK1	1.07892	8.18648	5.43606	1.60E-07	3.72695894328618e-06	6.84055721292933
GPI	-1.43035	9.8758	-5.42851	1.66E-07	3.85652862041954e-06	6.80519950516991
PINK1	-0.671377	7.597	-5.42564	1.69E-07	3.9005456757079e-06	6.79179074616327
CDA	-4.43055	5.69091	-5.42253	1.71E-07	3.94995996843617e-06	6.77719702182429
RPS23	0.389169	13.4234	5.41984	1.73E-07	3.99154380200534e-06	6.76464432937869
PF4	-3.44542	6.85675	-5.41793	1.75E-07	4.01850435825113e-06	6.75569388209231
GALNT2	1.81781	8.59748	5.41191	1.80E-07	4.12723170287168e-06	6.72756147113272
TOM1	-1.68261	6.27941	-5.40523	1.86E-07	4.2524631814104e-06	6.69636730643976
TPD52L2	-1.15055	9.24709	-5.40343	1.88E-07	4.27867094348961e-06	6.68800197546089
CUL1	-1.00511	8.57196	-5.40124	1.90E-07	4.31352352611128e-06	6.67775131323038
NOD2	-2.28237	5.30985	-5.39473	1.96E-07	4.44049336468088e-06	6.64742605214455
ZNF195	1.2465	8.45363	5.39026	2.00E-07	4.52626365974831e-06	6.62660131427973
NFIL3	-2.86028	9.40128	-5.38948	2.01E-07	4.53207484813228e-06	6.62293286285798
CTSH	-2.44231	8.02907	-5.3764	2.14E-07	4.81622168954024e-06	6.56207843690312
PPP3CA	-1.40574	9.00928	-5.37018	2.21E-07	4.95072366341423e-06	6.53319431334637
NME7	1.3399	7.84004	5.36888	2.22E-07	4.96948697144734e-06	6.52714358735129
ARAP1	-0.761683	8.03034	-5.36669	2.24E-07	5.00961989929522e-06	6.51700617817488
PTAFR	-1.47601	6.63367	-5.34859	2.45E-07	5.4533042876576e-06	6.43308957486746
TSPAN7	3.83488	8.89361	5.3404	2.55E-07	5.65871865161311e-06	6.39518011041998
GALNT7	1.32551	9.68771	5.33937	2.56E-07	5.67287803028677e-06	6.39038818676152
C14orf166	0.651878	12.0658	5.33482	2.62E-07	5.78416321674312e-06	6.36934596934402
PHACTR1	-2.24025	7.68633	-5.33075	2.67E-07	5.8838096272254e-06	6.35056380621733
STX11	-3.25748	4.81899	-5.32623	2.73E-07	5.99823077143663e-06	6.32969568226208
STMN1	1.25305	9.72898	5.31957	2.82E-07	6.17812219448763e-06	6.29895469553652
CCL5	-2.33077	8.27733	-5.30408	3.03E-07	6.63865496345621e-06	6.22756906972831
HIF1A	-1.08036	12.2468	-5.29798	3.12E-07	6.81865960091837e-06	6.19953122064005
AKTIP	-1.332	6.80161	-5.28985	3.25E-07	7.07186692855859e-06	6.16218273298118
PHF1	-0.980883	8.52758	-5.27925	3.42E-07	7.42156231557901e-06	6.11351502161661
PHC1	1.16204	8.45361	5.27449	3.49E-07	7.57377412607301e-06	6.09169337291254
PPP1R3D	-1.36744	5.80464	-5.27196	3.54E-07	7.64720817520007e-06	6.0801013563623
UPP1	-2.86906	6.30915	-5.267	3.62E-07	7.81122010581949e-06	6.0574112803576
UBE2D1	-1.21237	7.15758	-5.26493	3.66E-07	7.86998073603686e-06	6.04789907830381
MGAM	-3.23918	5.93854	-5.2494	3.94E-07	8.45368325099559e-06	5.97693580860498
CEBPB	-2.4021	10.3449	-5.23474	4.22E-07	9.02421938532002e-06	5.91005711720703
PADI4	-2.6379	5.37112	-5.23466	4.22E-07	9.02421938532002e-06	5.90966993237998
CLPP	0.855817	9.12122	5.22973	4.32E-07	9.21583923066258e-06	5.88721747069579
BID	-1.22372	8.47228	-5.22186	4.49E-07	9.54367048021572e-06	5.85139874409258
CDK5RAP3	1.23119	10.4667	5.21183	4.71E-07	9.98439982929848e-06	5.80581513209074
SLC35A3	1.21788	7.86453	5.20001	4.98E-07	1.05268086765287e-05	5.75220127015366
TM9SF2	-1.15593	9.97039	-5.19964	4.99E-07	1.05268086765287e-05	5.75053044905038
C3AR1	-2.07278	6.52996	-5.19145	5.18E-07	1.08927362280278e-05	5.71338206867446
PRG3	-2.91216	5.86747	-5.19141	5.18E-07	1.08927362280278e-05	5.71323295540389
GRK6	-0.976564	8.2296	-5.18602	5.32E-07	1.1147331692535e-05	5.68882341692139
MEGF9	-1.36611	7.09251	-5.16359	5.91E-07	1.23613825733301e-05	5.58747345499356
HLA-E	-1.1532	11.7382	-5.16296	5.93E-07	1.23687771803513e-05	5.58465297706296
DMXL2	-1.38354	6.67821	-5.15987	6.02E-07	1.2520423235621e-05	5.57073149116045
RUFY3	1.50635	7.39968	5.15919	6.03E-07	1.25311984224213e-05	5.56767031081388
DRAM1	-1.79052	7.60082	-5.15684	6.10E-07	1.26411772112241e-05	5.55706416004704
RPS6KA1	-1.29954	8.49155	-5.14675	6.40E-07	1.32241530709563e-05	5.51163087512654
GAA	-0.922436	7.7367	-5.14196	6.54E-07	1.34931492673325e-05	5.49011355495527
FUT4	-1.38771	8.25512	-5.13215	6.85E-07	1.40958677900804e-05	5.44602631787373
R3HDM4	-1.11338	9.74282	-5.12505	7.08E-07	1.45386773062534e-05	5.41418210408705
GOT2	0.911845	9.32976	5.12047	7.24E-07	1.48196778409389e-05	5.39363767565242
DUSP6	-2.24304	9.77448	-5.11691	7.36E-07	1.50339516263153e-05	5.37766972979235
FRAT2	-1.47296	8.15355	-5.11642	7.38E-07	1.50339516263153e-05	5.37549161763447
FAM214B	-0.823916	7.52618	-5.11291	7.50E-07	1.52478004176091e-05	5.35977228972193
FCGR1B	-2.44196	6.11233	-5.11229	7.52E-07	1.52568963986921e-05	5.35701655353048
MARCKSL1	1.32942	11.8131	5.1073	7.70E-07	1.55817216691602e-05	5.3346579183202
HK2	-2.13914	8.17796	-5.10405	7.81E-07	1.57837851184351e-05	5.32014246607124
CD177	-2.70498	7.13623	-5.10228	7.88E-07	1.58787139837903e-05	5.3122298926242
CHMP2A	-0.824574	9.5695	-5.08907	8.38E-07	1.68495325851858e-05	5.25323246170001
JUNB	-2.10777	9.24894	-5.08688	8.47E-07	1.6983773274622e-05	5.24347418548954
MAP1LC3B	-1.23428	10.3276	-5.08463	8.55E-07	1.71241445670843e-05	5.23343797169457
ABHD5	-1.05231	6.39257	-5.07927	8.77E-07	1.75168049119206e-05	5.20957999531857
SHQ1	1.18464	8.09115	5.07704	8.86E-07	1.76600825035521e-05	5.19963564332187
IDH3A	0.854375	7.46119	5.07305	9.03E-07	1.79503662518159e-05	5.18188601467666
MVP	-1.47278	7.70439	-5.07192	9.08E-07	1.80044902306476e-05	5.17686878673183
GNG5	-0.887483	11.3987	-5.07033	9.14E-07	1.80982399434995e-05	5.16976651210142
LAMP2	-1.01126	8.32593	-5.06903	9.20E-07	1.81672228443123e-05	5.16399907928565
ITGB2	-2.35292	9.37425	-5.06511	9.37E-07	1.84598613055031e-05	5.14658029572161
SCAI	1.95494	6.92314	5.06411	9.41E-07	1.85049823042299e-05	5.14212750238022
TFDP2	1.66759	8.24934	5.0614	9.53E-07	1.86980876794094e-05	5.13007845806947
XPO1	1.0213	11.3376	5.0593	9.62E-07	1.88395157288447e-05	5.12075878753267
MYH9	-1.04515	9.54386	-5.05867	9.65E-07	1.88529776001848e-05	5.11797343332447
CTDSP1	-0.880775	9.15646	-5.05616	9.76E-07	1.90323183437e-05	5.10681361009225
IP6K2	1.0465	9.45881	5.05523	9.81E-07	1.90727884202143e-05	5.10268802633673
ILF2	0.937152	11.0151	5.05262	9.93E-07	1.92212319017901e-05	5.09113689897482
MSRA	-1.12203	8.24715	-5.05262	9.93E-07	1.92212319017901e-05	5.09109607097483
ATP6AP2	-0.905015	9.77774	-5.05091	1.00E-06	1.93321209587504e-05	5.08351129237548
RDH11	0.790828	7.92903	5.04817	1.01E-06	1.9536412258987e-05	5.07137564937995
ZZZ3	0.849754	8.61195	5.04562	1.03E-06	1.97252367517317e-05	5.06009975432467
LDLRAD4	1.37793	8.28982	5.04247	1.04E-06	1.99444940763467e-05	5.04611771340619
MAST3	-1.08397	7.55567	-5.04207	1.04E-06	1.99444940763467e-05	5.04434621877017
PLAGL2	-0.779916	7.38972	-5.04184	1.04E-06	1.99444940763467e-05	5.04333845878836
ATF2	0.766298	7.60092	5.03989	1.05E-06	2.00818623630362e-05	5.03468031357583
CEACAM1	-1.88623	6.3314	-5.03943	1.06E-06	2.00818623630362e-05	5.03267062857004
HLA-C	-1.05858	13.0043	-5.03637	1.07E-06	2.03250484147568e-05	5.0191082916107
PSMC6	0.997509	9.8471	5.02724	1.12E-06	2.11551891433998e-05	4.97876248532549
DHX30	0.625357	8.46623	5.02666	1.12E-06	2.11588924108493e-05	4.97616979094348
LCP1	-1.42864	10.818	-5.02629	1.12E-06	2.11588924108493e-05	4.97453179253743
TKT	-1.11373	10.9058	-5.01669	1.17E-06	2.20701702437978e-05	4.93216090457137
TMEM9B	-0.910759	9.00697	-5.01457	1.18E-06	2.22395727824419e-05	4.92282
HLA-B	-1.20811	13.0992	-5.01396	1.19E-06	2.225577846323e-05	4.92011151166792
CTNNA1	-0.960689	7.65204	-5.01153	1.20E-06	2.245894471828e-05	4.90940557627332
CFLAR	-0.991911	7.07359	-5.00966	1.21E-06	2.25625539847372e-05	4.90118985605706
STK4	-0.889694	6.76886	-5.00962	1.21E-06	2.25625539847372e-05	4.90099099822701
MYL4	-1.42366	6.78833	-5.00829	1.22E-06	2.26532152063068e-05	4.89515530226727
NRBF2	-1.16403	8.01611	-5.00749	1.22E-06	2.26896485246729e-05	4.89162283759587
KTN1	0.968051	10.5669	5.00691	1.23E-06	2.27034600610009e-05	4.88904975201592
FBXO11	0.871844	8.57557	5.00296	1.25E-06	2.30716835643828e-05	4.87167226355911
NADK	-1.046	7.45634	-4.98662	1.35E-06	2.48200970556227e-05	4.79982030424114
MCUR1	0.935733	8.90041	4.98368	1.36E-06	2.51057845830302e-05	4.78689696340401
RCN2	1.04937	10.0643	4.98023	1.39E-06	2.54539415228927e-05	4.77175214741463
HLA-J	-1.45231	10.7543	-4.97803	1.40E-06	2.56588648311059e-05	4.76211431797922
PTGER2	-2.00011	7.35085	-4.97534	1.42E-06	2.59237754744914e-05	4.7503264767269
IGFLR1	-1.18941	7.97572	-4.97459	1.42E-06	2.59593446196621e-05	4.74705380357928
BZW2	0.923598	10.8246	4.97056	1.45E-06	2.63889592890877e-05	4.72940090426659
EID1	0.922004	9.60147	4.96979	1.45E-06	2.64284808519557e-05	4.72601653456851
MDH1	0.848471	11.0573	4.96473	1.49E-06	2.69510246848376e-05	4.70385052138269
PRR13	-0.937378	10.4796	-4.96463	1.49E-06	2.69510246848376e-05	4.70340125424648
ACTN1	-1.78189	8.31977	-4.96401	1.49E-06	2.69716722994224e-05	4.70072768658861
CHI3L1	-3.17528	6.56069	-4.96133	1.51E-06	2.72502169189632e-05	4.68896706339932
KIF3A	1.47689	6.6627	4.96056	1.52E-06	2.72903835516387e-05	4.68562544001252
TCF12	1.32349	8.43467	4.95995	1.52E-06	2.7311432288477e-05	4.68295882727195
TNIP1	-0.736441	9.15723	-4.95257	1.57E-06	2.81920108170316e-05	4.65069585977608
ARPC2	-0.717971	11.6427	-4.95135	1.58E-06	2.82931777525947e-05	4.64535000901368
TTC19	0.956285	9.93771	4.94419	1.63E-06	2.91743497517568e-05	4.61411552748448
MGAT4B	-0.993532	7.79159	-4.94008	1.67E-06	2.96667101453371e-05	4.59620538595414
VAMP3	-1.098	9.00585	-4.93897	1.67E-06	2.97578407007126e-05	4.59136413913106
HLA-DMB	-1.92114	9.7023	-4.93793	1.68E-06	2.98404498152072e-05	4.58680863610295
PRKCQ	1.41379	8.29796	4.9339	1.71E-06	3.03326040479908e-05	4.56927203350254
KLF4	-2.76995	7.87531	-4.93209	1.73E-06	3.0523101157874e-05	4.56139045885071
IL1R2	-2.95008	5.01023	-4.93113	1.73E-06	3.05961771840097e-05	4.55721
GSPT2	1.42611	8.27895	4.92393	1.79E-06	3.15543079935043e-05	4.52585271301482
ADRB2	-1.60623	6.28595	-4.92303	1.80E-06	3.16212288099816e-05	4.52194153889208
TRAT1	2.99843	7.2401	4.92104	1.82E-06	3.1824937833715e-05	4.51329024305063
EIF2AK1	-0.738772	8.41871	-4.92075	1.82E-06	3.1824937833715e-05	4.51204316506954
ZDHHC18	-0.742559	7.5322	-4.91752	1.85E-06	3.22321708494856e-05	4.49801811120706
SAP18	0.595908	9.57688	4.91531	1.86E-06	3.24940711212357e-05	4.48841385289989
ARHGEF3	1.95321	8.23258	4.91179	1.89E-06	3.29529501413503e-05	4.47314715244653
GGA2	-0.912047	7.38267	-4.90478	1.96E-06	3.39534154032639e-05	4.44270809883811
NOL11	1.09215	9.95424	4.90405	1.96E-06	3.39990480813561e-05	4.4395645096773
CCR7	-2.12464	7.83631	-4.89791	2.02E-06	3.48919939731695e-05	4.41294145684529
CLEC7A	-2.05325	5.94016	-4.89421	2.05E-06	3.54122891977618e-05	4.39694933372232
ARID3A	-0.972183	7.08375	-4.88726	2.12E-06	3.64740803259029e-05	4.36688126520473
RALB	-1.04909	7.99042	-4.88302	2.16E-06	3.71089357067729e-05	4.34855447400942
GPSM3	-1.33556	8.80795	-4.87894	2.20E-06	3.77277612734499e-05	4.33091754812733
LDHB	0.880254	12.6893	4.87137	2.27E-06	3.89640351970378e-05	4.29828826699541
WBP2	-1.10462	7.97939	-4.85913	2.40E-06	4.10984551073413e-05	4.24553067274391
OS9	-0.804781	9.25438	-4.85857	2.41E-06	4.11222704109861e-05	4.24314679013234
TGFBI	-2.71036	6.49942	-4.85784	2.42E-06	4.11800234254808e-05	4.2399795914621
ZDHHC7	-0.941069	9.63069	-4.85297	2.47E-06	4.20121060531062e-05	4.21905732184559
USP11	1.11395	10.0224	4.84917	2.51E-06	4.26479430478424e-05	4.20272517629554
ZBED4	0.81453	7.35888	4.84879	2.52E-06	4.26479430478424e-05	4.20108052472372
CYLD	-0.928514	7.65019	-4.84834	2.52E-06	4.26537778142117e-05	4.19913678608962
RPS24	0.429453	12.5731	4.84699	2.54E-06	4.28326642841638e-05	4.19333192671706
UBAP2	0.741334	9.0822	4.84616	2.55E-06	4.29118340829777e-05	4.18976290001352
GALNT1	-1.46872	9.36115	-4.84551	2.56E-06	4.29289736621158e-05	4.18697952230776
CHI3L2	2.78057	7.5232	4.84495	2.56E-06	4.29289736621158e-05	4.1845735264437
DUSP22	-1.04209	9.02949	-4.84481	2.56E-06	4.29289736621158e-05	4.18398350672112
DDX50	0.766242	9.17142	4.84112	2.61E-06	4.35657073871912e-05	4.16814
KCTD12	-2.1578	7.24525	-4.83488	2.68E-06	4.47198062605396e-05	4.1413917888749
EPM2AIP1	0.907774	9.40695	4.83204	2.72E-06	4.52098375117658e-05	4.12920472079544
CEP70	1.25229	7.35546	4.83042	2.74E-06	4.54547407792486e-05	4.12226648798861
IRX5	2.41065	6.04457	4.8288	2.75E-06	4.57002623408774e-05	4.11534652832815
IMPDH1	-1.16357	7.80414	-4.82807	2.76E-06	4.57651209428486e-05	4.11221752449192
HK3	-3.28582	6.37227	-4.82172	2.84E-06	4.69999704378364e-05	4.08503735741099
LTB4R	-1.37251	7.1421	-4.82129	2.85E-06	4.70040268828137e-05	4.08318622310008
BTG1	-1.13823	12.0227	-4.81633	2.91E-06	4.7961863151193e-05	4.06200268862144
XK	-2.51431	5.54127	-4.81596	2.92E-06	4.7961863151193e-05	4.06040929790969
CRLF3	-0.842719	10.1968	-4.81404	2.94E-06	4.82871698298512e-05	4.05220056605671
C8orf60	-1.47249	7.58959	-4.8125	2.96E-06	4.85310301058607e-05	4.04563851262429
IFITM3	-1.51138	11.4642	-4.81076	2.99E-06	4.88223490307188e-05	4.03817600597234
JADE3	1.16807	7.8578	4.80391	3.08E-06	5.0247514372119e-05	4.00897588278686
P2RY13	-3.57204	5.22408	-4.80052	3.13E-06	5.09234996044761e-05	3.99448163858272
CD19	-1.95992	9.26404	-4.79432	3.21E-06	5.2255965920731e-05	3.96809979114146
GNAI2	-1.02106	9.57885	-4.79082	3.27E-06	5.29823630813703e-05	3.95319269832075
KLF1	-2.16188	5.99728	-4.79005	3.28E-06	5.29930999056496e-05	3.94991570868153
PIK3C2B	1.24019	9.59905	4.78996	3.28E-06	5.29930999056496e-05	3.94953094879838
MAL	3.05742	8.52686	4.78177	3.40E-06	5.48639418345827e-05	3.91471094416549
SGK1	-2.40701	8.98175	-4.78082	3.41E-06	5.49987453044626e-05	3.91064435783706
SLC27A3	-1.57042	8.05715	-4.78012	3.42E-06	5.50702725664573e-05	3.90768184014098
ZNF426	1.15793	6.77937	4.77836	3.45E-06	5.54034969059832e-05	3.90020875609837
ABCD3	1.30296	8.89558	4.77368	3.52E-06	5.64680667483573e-05	3.88034200090945
NAPG	0.928923	7.17803	4.77044	3.58E-06	5.7184148957789e-05	3.86661203772637
CHP1	-1.00059	8.5825	-4.75747	3.79E-06	6.0470370792992e-05	3.81162541616009
FAM35A	1.01559	9.50277	4.75378	3.85E-06	6.13571536434844e-05	3.79603939456825
RANBP6	1.0155	9.29132	4.75132	3.89E-06	6.19201454306505e-05	3.78562827172557
ZEB2	-1.3509	8.06611	-4.74868	3.94E-06	6.2458913313491e-05	3.77443839017206
PTPLAD1	1.21524	8.32629	4.74857	3.94E-06	6.2458913313491e-05	3.77397132787221
FGFR1	1.23481	7.98917	4.7466	3.98E-06	6.28942396353671e-05	3.76565590447313
GALNS	-0.987454	7.46758	-4.74575	3.99E-06	6.30189605692251e-05	3.76207594125796
ASAP1	-1.42065	7.93426	-4.74038	4.09E-06	6.44228812039565e-05	3.7393860721331
CAPZB	-0.780329	9.74255	-4.73825	4.12E-06	6.49183731894366e-05	3.73039805126573
HLA-DPB1	-1.82461	10.629	-4.73671	4.15E-06	6.52448951308388e-05	3.72393387504112
AGTPBP1	-0.937426	7.72243	-4.73324	4.22E-06	6.60838272404822e-05	3.70927998845226
VPREB3	-2.43326	9.52604	-4.73303	4.22E-06	6.60838272404822e-05	3.70840165344212
CREG1	-1.55043	9.46111	-4.7282	4.31E-06	6.73909133017174e-05	3.68806286919693
EPHB6	1.85454	7.69612	4.72554	4.36E-06	6.80539521290677e-05	3.67686321330106
ID2	-2.23396	9.6363	-4.7252	4.37E-06	6.80539521290677e-05	3.67539528459233
DNAJB6	1.43273	8.11613	4.71369	4.60E-06	7.14745347841684e-05	3.62700377131047
PSIP1	0.953182	9.20159	4.71146	4.64E-06	7.19825515726412e-05	3.61765635726437
VGLL4	1.02116	9.12765	4.71129	4.65E-06	7.19825515726412e-05	3.61693642459853
WDR47	1.09371	8.16347	4.70636	4.75E-06	7.34368983028894e-05	3.59622487159646
ZNF467	-1.259	7.28731	-4.70339	4.81E-06	7.42759429739474e-05	3.58375011931834
ATP6AP1	-1.04707	9.68086	-4.69852	4.92E-06	7.57527772251122e-05	3.56334662118188
GABARAPL2	-0.778049	10.9418	-4.69663	4.96E-06	7.6251915615933e-05	3.55544453290324
CAPN3	-2.09173	7.16682	-4.69526	4.99E-06	7.65828167296445e-05	3.54967643295215
2025-03-05	0.865068	8.79393	4.69206	5.06E-06	7.75346944894361e-05	3.53627020102783
ACTR3	-0.744383	10.7172	-4.69087	5.08E-06	7.77520812309533e-05	3.5313173486125
CBX7	-0.972915	7.4174	-4.69064	5.09E-06	7.77520812309533e-05	3.53033066562354
SLC43A1	-0.98084	7.37803	-4.68956	5.11E-06	7.79875594042571e-05	3.52581836895737
CHIT1	-2.53251	5.04476	-4.68894	5.13E-06	7.80678478784599e-05	3.5232089699087
ACTR2	-0.822666	9.96561	-4.68269	5.27E-06	8.01006820123723e-05	3.49710147022621
TRIAP1	0.782269	9.85533	4.67797	5.38E-06	8.15850238781799e-05	3.47737888337931
UBP1	0.698633	9.9154	4.67773	5.39E-06	8.15850238781799e-05	3.47637221839044
SLC25A28	-0.688562	7.57881	-4.66764	5.63E-06	8.51297168541063e-05	3.43425900945556
SLPI	-2.70959	7.71059	-4.66564	5.68E-06	8.57334185222904e-05	3.42591624006367
DTX4	-1.52017	7.07168	-4.66319	5.74E-06	8.65105870224537e-05	3.41571283056494
ZDHHC3	-0.729585	7.55432	-4.65934	5.84E-06	8.78298538153688e-05	3.39969552571116
LEPROT	-0.823604	8.27266	-4.65215	6.02E-06	9.04810045582921e-05	3.36978101364403
NAP1L1	0.735227	11.7281	4.64986	6.08E-06	9.12381482557114e-05	3.36024554459317
UNC119	-1.23023	7.55676	-4.64851	6.12E-06	9.1620845091898e-05	3.35466058757493
IGLL3P	-1.69978	9.29274	-4.64423	6.24E-06	9.31200396688756e-05	3.33687878516448
OTUD3	0.966619	7.63853	4.64403	6.24E-06	9.31200396688756e-05	3.33601923822592
C1QBP	0.96043	10.702	4.64121	6.32E-06	9.41137232608359e-05	3.32432465829392
RBM10	0.643081	9.06323	4.63897	6.38E-06	9.47810055447992e-05	3.31503245141376
KDM7A	-1.36536	7.99141	-4.63882	6.38E-06	9.47810055447992e-05	3.31442353466555
HAGH	-1.00136	7.86767	-4.63836	6.40E-06	9.48164315062785e-05	3.31248316637911
YEATS2	0.810366	8.70809	4.63315	6.54E-06	9.68291618832174e-05	3.29091239563308
DBN1	1.45291	8.74797	4.63035	6.62E-06	9.78565111019281e-05	3.27929055649677
SORL1	-1.279	9.90239	-4.6283	6.68E-06	9.85672238418326e-05	3.27082834842688
TSPYL4	0.841205	10.0415	4.62567	6.76E-06	9.95375344877493e-05	3.25993383667594
OLR1	-2.62544	5.47687	-4.6242	6.80E-06	0.000100009900539817	3.25385807783435
HMGCR	1.1961	8.1129	4.62359	6.82E-06	0.000100112492179124	3.2513139018655
ALAS1	-1.23054	8.54472	-4.6228	6.85E-06	0.000100293338076067	3.24803070848732
SOS2	-0.738414	7.0807	-4.61752	7.00E-06	0.000102450907921652	3.22621809024576
FTH1	-1.20017	11.5773	-4.60906	7.27E-06	0.000106112454168546	3.19125343995286
CIDEB	-1.3322	7.34179	-4.60857	7.28E-06	0.000106149834059279	3.18926744408746
BNIP3L	-1.04681	10.4085	-4.60822	7.29E-06	0.000106149834059279	3.1878048980992
LST1	-1.8185	9.92874	-4.59962	7.57E-06	0.000110003263550377	3.15233698675935
RGS2	-2.83705	10.3815	-4.59799	7.62E-06	0.000110600021862583	3.14564149271757
SAMSN1	-2.41347	8.34388	-4.59722	7.65E-06	0.000110791612880303	3.14244786950787
FMNL1	-1.19943	7.99659	-4.5963	7.68E-06	0.000111050617541666	3.13868216559484
MRPL42	0.808141	8.50831	4.58928	7.92E-06	0.00011429189105334	3.10978165316704
LAT	1.77241	8.24388	4.58815	7.96E-06	0.000114668254460863	3.10511568507899
ILK	-0.910981	8.62205	-4.58642	8.01E-06	0.000115339732113521	3.09802653961537
ZNHIT3	0.725986	9.61352	4.57992	8.24E-06	0.000118436255834227	3.07130259513425
RELB	-1.31127	7.10023	-4.57833	8.30E-06	0.000119060690128013	3.06477103615549
GSTK1	-0.92371	9.83875	-4.57601	8.38E-06	0.00012006433147936	3.05526090861236
PLCL2	-0.852027	7.00363	-4.5688	8.65E-06	0.000123658934739448	3.02569092702017
RBL2	-1.05278	8.91678	-4.56739	8.70E-06	0.000124153315038275	3.01992805037602
ADAP1	-1.14051	6.99366	-4.56713	8.71E-06	0.000124153315038275	3.01885162453533
SELL	-2.11497	10.3809	-4.56491	8.79E-06	0.000125145493148204	3.00976606503674
EXTL2	1.00139	7.56477	4.5607	8.96E-06	0.000127234552699091	2.99251369643369
RBM14	0.766201	8.34937	4.55889	9.03E-06	0.000128022190781716	2.98513368400895
POGZ	0.794444	8.1802	4.55849	9.04E-06	0.000128040035731239	2.98348903753669
MAP3K8	-1.80374	7.41686	-4.55811	9.06E-06	0.000128044895232842	2.98194320046296
WDYHV1	0.835817	7.64044	4.55753	9.08E-06	0.000128160891314161	2.97957526891346
EREG	-2.4382	5.60119	-4.55575	9.15E-06	0.000128944901910014	2.97227423555428
VPS37C	-0.900912	7.30054	-4.55053	9.36E-06	0.000131526738263445	2.95095011808837
MTF2	0.909577	9.47786	4.5503	9.37E-06	0.000131526738263445	2.94999653319918
PRKCI	0.928645	7.4294	4.55004	9.38E-06	0.000131526738263445	2.94893401392173
GNB2	-1.00569	9.55449	-4.53927	9.82E-06	0.000137532110176529	2.90501584417664
FAM46C	-1.8706	7.64683	-4.53432	1.00E-05	0.000140266760954395	2.88481792219953
ZNF43	1.28328	8.46757	4.53341	1.01E-05	0.000140593294820097	2.88111870977146
NPM1	0.576649	12.2613	4.52678	1.04E-05	0.000144416909207524	2.8541409347439
MAFB	-2.70784	7.40472	-4.51301	1.10E-05	0.000152943444676087	2.79817244850494
TCL1A	-2.53628	10.5086	-4.51	1.11E-05	0.000154678587214641	2.78597669141503
APOBEC3B	-1.94257	6.92395	-4.50699	1.13E-05	0.000156268488953987	2.77377755828767
SAT1	-1.42017	11.1747	-4.50687	1.13E-05	0.000156268488953987	2.77330759135804
GABARAPL1	-1.84396	7.0506	-4.50108	1.16E-05	0.000159929292640461	2.74984465293211
YWHAB	-0.697636	11.1371	-4.50008	1.16E-05	0.000160157607331705	2.74578393460092
XPA	0.892333	8.06996	4.50002	1.16E-05	0.000160157607331705	2.74554606812823
IPO5	0.658943	8.57453	4.4932	1.20E-05	0.000164623300182952	2.71796753624323
ZNF106	-0.73874	8.74966	-4.49145	1.20E-05	0.000165601815558355	2.71087527884879
MRPL48	0.91863	8.80457	4.48938	1.22E-05	0.000166809611746961	2.70251294292876
KDM1A	0.816675	9.21543	4.48843	1.22E-05	0.000167227606407646	2.69867564938692
LPCAT1	-1.15983	8.58764	-4.48779	1.22E-05	0.00016742310262884	2.69610728227615
ATHL1	1.86473	8.84781	4.48547	1.24E-05	0.000168828059790844	2.68671781604981
BLNK	-2.1863	8.90529	-4.48161	1.26E-05	0.000171356154055412	2.67115498023509
RGL2	-0.883367	8.78446	-4.47537	1.29E-05	0.000175690117596647	2.64599628018886
CD3E	1.55158	7.97125	4.47074	1.32E-05	0.000178904323949268	2.62734121161664
NTAN1	-0.87988	8.34863	-4.46908	1.32E-05	0.000179896563622156	2.62064
NUDT9	0.873698	8.07005	4.46382	1.35E-05	0.000183674913272332	2.59947617592865
SMYD3	1.04071	8.41357	4.4628	1.36E-05	0.000183968773114391	2.59536106825686
TRIM37	0.636974	8.2209	4.46272	1.36E-05	0.000183968773114391	2.59507528029006
ELL	-0.765669	6.13216	-4.45814	1.39E-05	0.000187291888993286	2.57665086126268
S1PR4	-1.03971	8.90622	-4.45119	1.43E-05	0.000192594056920249	2.54873008707172
MBOAT2	-1.22516	7.30093	-4.43576	1.53E-05	0.000205248768739773	2.48693430198971
LAMP1	-0.813012	9.60495	-4.43366	1.54E-05	0.000206762373156575	2.47853472553593
HMGN3	1.05076	11.7324	4.43243	1.55E-05	0.000207529200057839	2.47359478574049
DNASE1L1	-0.835231	8.0724	-4.4247	1.60E-05	0.000213871813934351	2.44270996344078
CTSL	-1.72529	6.63684	-4.42457	1.60E-05	0.000213871813934351	2.44219560744113
ZMYM5	0.950923	6.92784	4.42399	1.60E-05	0.000214077330509186	2.43986225426974
ARPC5	-0.872431	10.2556	-4.42254	1.61E-05	0.000215060029796615	2.43409923858447
PLSCR1	-1.24643	8.31046	-4.41584	1.66E-05	0.000220881607315741	2.40735747186509
MRPL9	0.60398	9.80126	4.41108	1.69E-05	0.000225008600963841	2.38839222219988
APOBR	-1.67838	6.23577	-4.40973	1.70E-05	0.000225945657500552	2.38303883947248
GALNT6	2.10272	7.22683	4.40769	1.72E-05	0.000227556601618876	2.37489268244817
ENO2	2.01444	6.38727	4.4061	1.73E-05	0.000228604930190853	2.36856261935807
EXO5	0.944855	6.13895	4.40589	1.73E-05	0.000228604930190853	2.36771897657627
SH2D1A	2.21965	7.41464	4.40542	1.73E-05	0.000228709527975135	2.36588008673663
BCKDK	-0.78376	7.59314	-4.40151	1.76E-05	0.000232148728286967	2.35033008890131
CCT2	0.836392	11.0182	4.39895	1.78E-05	0.00023431495729362	2.34012620161661
IMPDH2	0.947227	11.3949	4.39783	1.79E-05	0.000234919570256994	2.33569244470202
SLC5A3	1.2447	7.91852	4.39763	1.79E-05	0.000234919570256994	2.33488815163134
CCNG1	0.856947	10.9282	4.39658	1.80E-05	0.00023556766399583	2.33074300071371
DEF8	-1.51457	7.0885	-4.39627	1.80E-05	0.00023556766399583	2.32948978584898
BPTF	0.73842	9.02879	4.39146	1.84E-05	0.000240011490380295	2.31038869648661
ARPC3	-0.92453	11.8397	-4.38919	1.86E-05	0.000241898989744865	2.30139512499227
ARMCX3	1.24817	8.77169	4.38889	1.86E-05	0.000241898989744865	2.30019090559516
STX3	-1.30456	6.85298	-4.38704	1.87E-05	0.00024342402958371	2.29285149280548
DYNLT1	-1.39585	10.078	-4.38603	1.88E-05	0.000243745601125847	2.28886613070429
PNRC1	-1.09405	11.1881	-4.38602	1.88E-05	0.000243745601125847	2.28883809201319
NREP	1.36791	9.39288	4.38559	1.88E-05	0.000243830376249081	2.28713038246454
ANXA11	-0.624492	9.22076	-4.38174	1.91E-05	0.00024743490181584	2.27185012954385
CAND1	0.755059	8.32161	4.37582	1.96E-05	0.000253266492611127	2.24840665245505
CD7	2.06925	7.02856	4.37404	1.98E-05	0.000254787439780475	2.24136268006148
TLR4	-1.71081	4.99159	-4.37034	2.01E-05	0.000258376467739088	2.22674211234024
CLEC5A	-2.84163	5.53734	-4.36859	2.02E-05	0.000259891880632694	2.21983482816024
YARS2	0.825781	7.87088	4.3679	2.03E-05	0.000260268677249246	2.2170966869029
ANO10	-1.09177	6.61543	-4.36328	2.07E-05	0.000264948281334155	2.19885420439161
DENND5A	-1.26619	9.59577	-4.35865	2.11E-05	0.000269720948851474	2.18058392930153
FDFT1	0.937902	10.2997	4.35666	2.12E-05	0.000271570092131358	2.17275380891117
GRINA	-1.25286	7.35257	-4.35535	2.14E-05	0.000272667002715894	2.16757876017453
GNLY	-2.35591	7.46461	-4.35215	2.17E-05	0.000275927370357905	2.15496716868738
ABHD10	0.92605	8.66687	4.35091	2.18E-05	0.000276959687243165	2.15007741406873
ZNF337	0.595637	7.81257	4.34822	2.20E-05	0.000279670063299276	2.13950440062231
CD74	-1.68507	10.9093	-4.34666	2.22E-05	0.000281084812681369	2.13337700180719
PLCG2	-0.929395	8.36018	-4.34586	2.22E-05	0.000281628623229967	2.13019918214421
SSH1	-0.684621	7.03946	-4.34392	2.24E-05	0.00028350674922748	2.12256030457342
MAP4K3	1.29593	7.56034	4.33804	2.30E-05	0.000290092515957675	2.09947589278036
MIF	0.879615	12.2766	4.33485	2.33E-05	0.000293547940800933	2.08692480040525
GTF2H4	0.792946	7.7076	4.32798	2.39E-05	0.000301598029772197	2.05997684519077
MLC1	-1.71083	6.19851	-4.32565	2.42E-05	0.000304087254239495	2.05085949846658
IRAK3	-1.68826	6.84005	-4.3245	2.43E-05	0.000305108915892112	2.04634918551606
KLF3	-1.42427	6.6524	-4.32115	2.46E-05	0.000308935518116947	2.03321962618277
TIA1	0.925175	8.94315	4.31715	2.50E-05	0.000313654874132347	2.01754070306061
FGL2	-1.89535	6.05223	-4.31609	2.51E-05	0.000314582440734072	2.01341641934974
MTERF3	1.07918	8.27808	4.30576	2.62E-05	0.000327842851225733	1.97302241066784
IFT20	-0.644914	9.60284	-4.3049	2.63E-05	0.000328545720407578	1.96967030403507
DMTN	-1.66046	6.85895	-4.30411	2.64E-05	0.00032915347210687	1.96659778631561
NDUFA5	0.891313	8.33486	4.29841	2.70E-05	0.000336506785723712	1.94437450275639
ELOVL5	0.839851	8.62638	4.29018	2.80E-05	0.000347319187401812	1.91227377470881
KPNB1	0.646239	10.0746	4.29006	2.80E-05	0.000347319187401812	1.9118220766068
TRIM24	1.18047	8.25196	4.2852	2.86E-05	0.000353844859195607	1.89290129998989
JAK1	-0.941276	9.95189	-4.27829	2.94E-05	0.000363526877051881	1.86605981240371
NAGK	-0.81447	8.71046	-4.27597	2.97E-05	0.00036649842628644	1.85704972626929
S100A6	-1.78375	9.34228	-4.27392	2.99E-05	0.000368877794251334	1.84910612984804
ORMDL2	-0.844293	8.79825	-4.27353	3.00E-05	0.000368877794251334	1.84759903118844
GOLGA7	-0.656102	10.1885	-4.27309	3.00E-05	0.000368877794251334	1.84588779474251
PSMA1	0.605898	11.4107	4.27305	3.00E-05	0.000368877794251334	1.84570019879254
ACOT13	0.901226	8.27402	4.26505	3.10E-05	0.000380642212337835	1.81471678970871
NUDT15	1.07123	8.53442	4.26226	3.14E-05	0.000384496126021024	1.80389282747343
PCYOX1L	-0.698125	8.19251	-4.26171	3.15E-05	0.000384839569559762	1.80174952860801
SNN	-1.2361	7.49689	-4.25698	3.21E-05	0.000391824318707837	1.78345041438233
GFPT1	0.902511	7.10565	4.25556	3.23E-05	0.000393565141852645	1.77796488013948
PPP1CC	0.682849	11.6453	4.25503	3.23E-05	0.000393883404330733	1.77590706206556
TIAL1	0.54826	8.88935	4.25458	3.24E-05	0.00039406717747492	1.77417415402367
TMX2	0.642316	9.4436	4.25056	3.29E-05	0.000400045395040528	1.7586540956974
SMARCA4	0.813059	9.50351	4.24957	3.31E-05	0.000401130430914885	1.75480595309172
RAB1A	-0.659719	9.25176	-4.24832	3.32E-05	0.000402631226625809	1.74999022934004
COQ2	-0.827261	7.65196	-4.2471	3.34E-05	0.000404091377720306	1.74528455008777
ADNP	0.92135	10.0517	4.24507	3.37E-05	0.000406760923645355	1.73743412094498
KLRF1	-1.57289	6.08677	-4.24482	3.37E-05	0.000406760923645355	1.73649804066068
ENTPD1	-1.72082	5.90445	-4.24387	3.38E-05	0.000407797316757481	1.73281397089438
HBD	-3.40401	9.74484	-4.23361	3.53E-05	0.000424646612706704	1.69328322611683
PAFAH1B3	1.17044	8.72583	4.22898	3.59E-05	0.00043215609842198	1.67544769437205
DENND4B	-0.787104	9.47321	-4.21862	3.75E-05	0.000450153499825557	1.63563518816992
ZFP36	-1.50922	11.0028	-4.21774	3.76E-05	0.000451147838804851	1.63227940388927
ADAM8	-1.25922	6.24054	-4.21532	3.80E-05	0.000454487495151571	1.62298429427324
PUM1	0.629431	10.505	4.21527	3.80E-05	0.000454487495151571	1.62277551878918
GYPB	-1.69958	6.04803	-4.21458	3.81E-05	0.00045515269441172	1.62012758708209
PIP4K2A	-1.01733	8.22509	-4.21171	3.86E-05	0.00045986848076003	1.60912884750736
TP53BP1	0.662669	7.96838	4.20819	3.91E-05	0.000465447090979015	1.59563874210812
VAMP8	-0.986799	10.784	-4.20808	3.91E-05	0.000465447090979015	1.5952182429811
CASP7	0.89118	8.58328	4.2047	3.97E-05	0.000471246234156836	1.58226714934477
RAC2	-1.12142	10.6105	-4.20252	4.00E-05	0.000474791422257298	1.57393294081882
DROSHA	0.847985	9.19611	4.20001	4.04E-05	0.000478842435556778	1.56432276928082
VOPP1	-1.11212	9.30199	-4.19977	4.05E-05	0.000478842435556778	1.5634010447943
SH3BGRL	-0.662233	10.8929	-4.19935	4.05E-05	0.000479021885806899	1.56179441468807
CEP57	0.787871	8.57844	4.19797	4.08E-05	0.000480797294933292	1.55651234839362
NR2C2	0.665697	6.98292	4.19778	4.08E-05	0.000480797294933292	1.55580118735283
LANCL1	0.643524	8.04968	4.19698	4.09E-05	0.000481723507389303	1.5527364948781
ATP5A1	0.359206	11.5462	4.19164	4.18E-05	0.000491599888688181	1.53233287881226
PDZD8	-1.21044	8.12873	-4.18945	4.22E-05	0.000495321166205625	1.52397043877129
RP2	-0.88677	7.35851	-4.18801	4.24E-05	0.00049742233728872	1.51849451995293
TRMT11	0.994283	8.16193	4.18775	4.25E-05	0.00049742233728872	1.51749127902205
DLG1	0.669078	7.4839	4.18737	4.26E-05	0.00049752810034298	1.51605119458107
HMBS	-1.19816	8.59478	-4.18413	4.31E-05	0.000503434793926656	1.50367470039628
LETM1	0.605641	7.59675	4.18213	4.35E-05	0.000506849111472197	1.49605978028757
TGFB1	-1.08158	7.46379	-4.1803	4.38E-05	0.000509946654291954	1.48907564458046
MAN2A2	-0.742916	8.2592	-4.17241	4.52E-05	0.000525739309969172	1.45906375495267
VCL	-1.08094	8.88575	-4.16574	4.64E-05	0.000539366370528674	1.43369026532671
CD53	-0.815875	10.6244	-4.16396	4.68E-05	0.000542541940270501	1.42692322317667
IRF1	-1.2561	9.62115	-4.16316	4.69E-05	0.000543581614997441	1.42388970512194
SLC25A38	0.729881	9.21315	4.15729	4.80E-05	0.000555849070056641	1.40161281186739
RNASE6	-2.09721	7.14708	-4.15689	4.81E-05	0.000556011211595162	1.40011355734914
SLC6A8	-1.34665	5.88741	-4.15512	4.85E-05	0.000559258389396652	1.39339867192867
CAMTA2	-0.624587	7.28835	-4.14656	5.02E-05	0.000578060413152708	1.3609929787711
ZNF184	1.04229	8.48616	4.14355	5.08E-05	0.000584334504282356	1.34959432060049
PTP4A1	-0.824312	9.1138	-4.14062	5.14E-05	0.000590474100413148	1.33852142587693
FAM8A1	-0.948972	9.40623	-4.13814	5.19E-05	0.000595597292073982	1.3291603266792
USP14	0.698532	9.80437	4.13631	5.23E-05	0.000599212284825351	1.32224103466599
ACAT2	0.7457	8.84412	4.1342	5.27E-05	0.00060319722550847	1.31427426985818
RPL3	0.357644	13.967	4.13379	5.28E-05	0.00060319722550847	1.31272233899035
SACS	1.22193	7.64461	4.13359	5.28E-05	0.00060319722550847	1.31196802690785
PRKAR2B	-2.01975	8.02212	-4.13338	5.29E-05	0.00060319722550847	1.31115125747297
LZTFL1	1.37429	7.8002	4.13296	5.30E-05	0.000603433356906973	1.30957597953512
HMHA1	-0.734248	8.63369	-4.13137	5.33E-05	0.000606516326093596	1.30356717525395
MTMR14	-0.660666	8.59857	-4.12179	5.54E-05	0.000629338974207186	1.26747723175177
SLC48A1	-0.721006	7.21749	-4.12149	5.55E-05	0.000629338974207186	1.26634493914183
APEX1	0.656492	11.7421	4.1204	5.57E-05	0.000631280407698631	1.26224215397216
RPS7	0.280221	13.8516	4.11217	5.76E-05	0.000651527099149396	1.23129416678007
ASUN	1.0258	8.89107	4.11036	5.80E-05	0.000655426475595258	1.2244749457113
DCTPP1	0.733719	9.70529	4.10978	5.81E-05	0.000656093091669581	1.22232210744984
PPAT	0.918932	7.51263	4.10741	5.87E-05	0.000660860733985517	1.21341823295646
TANK	-0.889612	7.37825	-4.10733	5.87E-05	0.000660860733985517	1.21311
CYTH4	-0.970858	7.02951	-4.10187	6.00E-05	0.000674529044610481	1.19263733412434
C5orf28	0.7389	7.59452	4.10028	6.04E-05	0.000677949986574824	1.18668292762513
COLGALT1	-0.727673	8.27324	-4.09696	6.12E-05	0.00068612117154021	1.17420980393746
CBFA2T2	0.449309	7.45325	4.09463	6.17E-05	0.000691622065943978	1.1655023506236
GZMK	-1.87326	7.1388	-4.0943	6.18E-05	0.000691653280668123	1.16427577615481
GPD1L	-0.862302	7.71879	-4.09196	6.24E-05	0.000697236447780985	1.15552058971382
CD3G	2.06231	7.87066	4.09072	6.27E-05	0.000699810216413813	1.15086922150946
SLC10A3	-1.01739	7.39172	-4.09035	6.28E-05	0.000699967788610182	1.14947766504318
ECI2	0.975223	8.59041	4.0895	6.30E-05	0.000700790089576462	1.14629249236668
CACNB3	1.08499	7.50978	4.08942	6.30E-05	0.000700790089576462	1.14601731843367
TGOLN2	-0.496733	8.69954	-4.08698	6.36E-05	0.00070673815865433	1.13688241455778
RTN3	-0.957501	9.93016	-4.08604	6.39E-05	0.00070849795599568	1.1333668068436
ARMCX1	2.07855	8.3955	4.0827	6.47E-05	0.000716869049501553	1.12087060054557
IL4R	-1.35895	8.32418	-4.08245	6.48E-05	0.000716869049501553	1.11996294624923
IGHD	-1.49222	6.83479	-4.08128	6.51E-05	0.000719311909981169	1.11559050224552
ASF1A	1.20436	8.3263	4.07993	6.54E-05	0.000722287690893542	1.11053547980064
FAM168A	0.641349	7.74197	4.07558	6.66E-05	0.00073326640577565	1.0942895137021
FAM60A	0.858895	10.0949	4.0755	6.66E-05	0.00073326640577565	1.09400077644162
CDK2AP1	0.899718	11.6402	4.07324	6.72E-05	0.000738929430705486	1.08559445456986
NARS2	0.760527	8.4205	4.07166	6.76E-05	0.000742665073402804	1.07968535581414
PAQR3	0.893989	7.12099	4.07112	6.78E-05	0.000743332902304845	1.07767905212851
PMS2P1	0.617704	9.10651	4.07048	6.79E-05	0.000744312796715036	1.07528
CD58	-1.06161	7.7284	-4.0584	7.13E-05	0.000779740687117056	1.0303532961661
PNMA1	1.3766	8.85266	4.05483	7.23E-05	0.000789829802398489	1.01709877452416
TMUB2	-0.684042	8.14331	-4.05397	7.25E-05	0.000790847380201191	1.01389969402844
TOB2	0.990969	7.89758	4.05389	7.25E-05	0.000790847380201191	1.01358058719978
HHEX	-1.59368	9.15765	-4.05164	7.32E-05	0.000796921946200677	1.00522893224845
PTPN18	-0.902602	7.71015	-4.04753	7.44E-05	0.000808935241379088	0.990000469533257
PDSS1	0.682283	7.75298	4.04672	7.46E-05	0.000810532249945152	0.986996588302245
SPIN1	1.09091	8.93202	4.04463	7.52E-05	0.000816246319444064	0.979240147802256
CXCL8	-2.89851	8.25046	-4.04027	7.65E-05	0.000829355148071476	0.963105639862265
CTCF	0.772871	10.104	4.03818	7.72E-05	0.000834813348629987	0.955340885738687
PPP2R5E	0.627012	9.54527	4.03799	7.72E-05	0.000834813348629987	0.95464856156067
TST	-1.2126	8.06236	-4.03727	7.74E-05	0.000836177889302325	0.951971249965137
ATP6V0A1	-0.919338	7.044	-4.03626	7.77E-05	0.000838465307712489	0.948261918682351
CHD7	-1.4959	8.01887	-4.03402	7.84E-05	0.000844869541826456	0.93996636973958
SEPHS1	0.821532	8.64061	4.03326	7.87E-05	0.000846359400176171	0.937172427593901
DGAT1	-0.812034	7.76717	-4.03027	7.96E-05	0.000854434823546389	0.92611168800172
PLP2	-1.54136	10.2716	-4.03023	7.96E-05	0.000854434823546389	0.925971397157245
ACADM	1.11272	9.94097	4.02919	7.99E-05	0.000856909442631098	0.922118869157158
WDR26	-0.659721	9.16784	-4.028	8.03E-05	0.000859892344001564	0.917719548416284
ASCC1	0.690478	8.27988	4.02763	8.04E-05	0.000860118141020023	0.916342900871801
ATP2B4	0.922749	9.13541	4.02215	8.22E-05	0.000877366035401278	0.896142743681343
PCBP1	-0.69294	11.5366	-4.02174	8.23E-05	0.000877366035401278	0.894617945106257
NR4A2	-2.52321	8.38092	-4.02165	8.23E-05	0.000877366035401278	0.894290501912939
ZBTB39	0.636867	7.33344	4.02055	8.27E-05	0.000880098491789345	0.890242321037254
POLD2	0.828021	8.56052	4.01736	8.37E-05	0.000890123597853116	0.878469315239334
HADH	0.86844	8.97566	4.01702	8.38E-05	0.0008902525804642	0.877211722053319
KARS	0.579608	11.4225	4.01669	8.40E-05	0.000890325836644453	0.876014343545247
ATG9A	-0.715914	7.96288	-4.01403	8.48E-05	0.000898599801190752	0.866198447280206
AGFG1	-0.672311	7.79657	-4.01192	8.55E-05	0.000904977329528468	0.858432252444381
RBM6	0.69401	9.00851	4.00955	8.63E-05	0.000912317399740495	0.849722090990653
DNTT	1.8059	11.3455	4.00522	8.78E-05	0.000926805909593029	0.833796176069735
TRBC1	2.06367	10.6568	4.00478	8.80E-05	0.000927299342150415	0.8321827905504
VEZT	1.12034	6.18798	4.00313	8.85E-05	0.000932184771522463	0.826131916636236
SLCO3A1	-1.12195	6.12013	-4.0014	8.91E-05	0.000937425006555048	0.819752596097072
WIPI1	-1.69259	5.95779	-3.99968	8.97E-05	0.000942609710340856	0.813459586736626
DENND3	-1.48545	7.77469	-3.99571	9.11E-05	0.000954487246899956	0.798880634166078
SNCA	-1.6189	7.22941	-3.9957	9.11E-05	0.000954487246899956	0.798863427579643
BDH2	0.66274	8.70983	3.99552	9.12E-05	0.000954487246899956	0.798189773105246
COQ4	0.682375	7.73326	3.99527	9.13E-05	0.000954487246899956	0.797268527499657
TARBP2	0.552957	8.04857	3.99199	9.25E-05	0.000965654486858682	0.785235410235682
CDK8	0.740361	7.42291	3.98919	9.35E-05	0.000975110201120451	0.774977998418858
RPL10A	0.375128	13.6543	3.98512	9.50E-05	0.000989256163031522	0.760098397292725
NLRP3	-1.79406	5.33259	-3.98489	9.51E-05	0.000989256163031522	0.759247478460676
SSBP2	0.870481	9.38291	3.98352	9.56E-05	0.000993391113807468	0.754231671112245
MRPS35	0.59312	9.31324	3.98253	9.59E-05	0.000996083924453809	0.75059278779671
MAP3K1	-1.29214	6.51016	-3.97724	9.79E-05	0.00101559658811836	0.731273752136404
ZNF787	-0.687652	6.82768	-3.97276	9.97E-05	0.00103222830605572	0.71492303100837
CBFA2T3	1.59349	9.2883	3.96963	0.000100876	0.00104367022554423	0.703477808920608
CFDP1	0.655436	7.98731	3.96816	0.000101451	0.00104840371974299	0.698137724525782
RNASEH2B	0.692859	7.87897	3.96504	0.000102689	0.00105996870294843	0.686746132266157
AGO4	-0.596951	6.39545	-3.96311	0.000103461	0.00106670417026851	0.679710319996592
THBS1	-1.77281	5.03418	-3.96204	0.000103889	0.00106987293055992	0.675838758345844
PVRIG	1.61051	9.22224	3.96029	0.000104597	0.00107592283908818	0.669458967655681
CAT	-1.09049	8.77048	-3.95975	0.000104815	0.00107692440379764	0.667501661541949
TARS	0.617545	9.25874	3.95842	0.000105358	0.00108125825406026	0.662648285501017
AACS	1.15789	7.55214	3.9574	0.000105777	0.00108430922619381	0.658921588930959
NAE1	0.756682	10.393	3.95479	0.000106851	0.00109405208106229	0.649443342749438
SNRPD2	0.578392	12.5591	3.95401	0.000107172	0.00109607925498417	0.646626861505197
SPECC1L	0.59501	8.46926	3.95315	0.000107533	0.00109851034160964	0.643469625556444
ARHGEF6	-0.962528	9.99179	-3.95061	0.000108592	0.00110806084820527	0.634267102561022
LILRB1	-1.19775	7.1581	-3.95009	0.000108813	0.00110904207175055	0.632361481923992
SMARCE1	0.562735	9.76529	3.94672	0.000110241	0.00112231394184265	0.620121322643924
CORO1A	-1.34298	10.6128	-3.94565	0.000110698	0.0011256790992553	0.61623893947534
VAT1	1.08761	9.37886	3.94519	0.000110893	0.00112638271739031	0.614581530603692
ZNF274	-0.814457	8.37292	-3.94017	0.000113067	0.00114715413517225	0.596361581682777
ATXN10	0.48668	9.62977	3.93811	0.000113969	0.00115499170250095	0.588903177978282
NOLC1	0.605354	8.84857	3.93705	0.000114437	0.00115841495125881	0.585058810449539
CLPX	0.647134	8.34326	3.93508	0.000115309	0.00116591860815076	0.577934022409879
CECR1	-1.33066	9.01417	-3.93347	0.000116026	0.00117183347036236	0.572121033136294
WDR83OS	-0.517404	10.155	-3.93279	0.000116332	0.00117359337381891	0.56964955917646
TRMT61B	0.609416	8.30395	3.93192	0.000116724	0.001176217987467	0.566491368629859
UXS1	-0.835957	8.92652	-3.92816	0.000118426	0.00119202342536567	0.552906436991844
TRIM28	1.05914	10.6367	3.92467	0.000120032	0.00120682233984394	0.5402710414086
GGA1	-0.480727	8.36901	-3.92345	0.000120594	0.00121110606703085	0.535888689906971
ADD3	-1.30631	10.4113	-3.92247	0.000121051	0.00121432256498305	0.532343500561059
MRPL57	0.650803	10.0971	3.92044	0.000121999	0.00122245997942054	0.525022448605942
SRSF3	0.471694	10.8079	3.91932	0.000122528	0.00122499362150811	0.520965827540371
ZNF767P	0.785944	7.56918	3.91918	0.000122591	0.00122499362150811	0.520483199312272
HRAS	0.640179	7.79648	3.91903	0.000122664	0.00122499362150811	0.519920170693385
CYTH2	0.736816	8.31116	3.91689	0.000123676	0.00123370865360238	0.512219617080445
SYNGR2	-0.833947	8.09453	-3.91631	0.000123952	0.00123508120272778	0.510126918986345
ATP5B	0.551767	12.0898	3.91518	0.000124494	0.00123909916314131	0.506032004061624
ATP6V0C	-0.809642	10.77	-3.91218	0.000125938	0.00125206708450931	0.495220070873659
SULT1A2	-0.705241	8.32855	-3.91167	0.000126181	0.00125303881364615	0.493408617737175
SIGLEC5	-1.95327	5.76407	-3.91139	0.000126317	0.00125303881364615	0.49240141501705
EGR3	-2.08029	6.5695	-3.90963	0.000127175	0.00126015067463578	0.486049946963011
IL17RA	-1.26788	8.65302	-3.90776	0.000128092	0.00126782751681015	0.479311807634278
NBN	-0.716026	8.16663	-3.90485	0.000129531	0.00128065072481334	0.468833755923423
F13A1	-2.24556	7.56794	-3.90446	0.000129723	0.00128099329803488	0.4674508167109
BLOC1S1	-0.852354	9.27379	-3.9042	0.000129854	0.00128099329803488	0.46650386002422
GLA	-0.751116	8.81261	-3.90293	0.000130485	0.00128579470718324	0.461958130739631
NASP	0.836202	10.1219	3.90165	0.000131128	0.00129070343184844	0.457348808371917
SOD1	0.814829	12.1304	3.8996	0.000132162	0.00129834508272129	0.449985462155462
LAX1	1.21265	7.9876	3.89954	0.000132196	0.00129834508272129	0.449744480525868
TRIB1	-1.62455	7.73646	-3.89694	0.000133518	0.00130988351305953	0.440416388228867
DFFA	0.624455	7.94858	3.89582	0.000134092	0.00131407103800855	0.436392267283765
MXD1	-2.07688	6.43553	-3.89376	0.00013515	0.00132298664070809	0.429022738679921
FBXO9	-0.610209	8.3531	-3.89246	0.000135827	0.00132815005606178	0.424341773622324
CPPED1	-0.956127	6.22675	-3.88914	0.000137561	0.00134363299156035	0.412449476101091
EPB42	-2.42859	6.13504	-3.88577	0.000139345	0.00135956681409642	0.400372899175668
HSP90AA1	0.740932	12.8493	3.8851	0.000139701	0.00136155376119301	0.3979782316913
UBAP1	-0.734172	8.50359	-3.88452	0.000140014	0.0013631067397165	0.39588504782116
IDH2	0.89023	9.30355	3.88215	0.000141285	0.0013739790689215	0.38741605418336
SS18L1	0.761516	8.00128	3.87873	0.000143145	0.00139055065721403	0.375158841667607
PRMT7	1.20277	7.11929	3.87492	0.00014524	0.00140936238713899	0.361546436239247
GARS	0.644244	10.165	3.86842	0.000148884	0.00144315726911724	0.338326110586332
CNOT7	0.602885	9.90462	3.86705	0.00014966	0.00144846919417735	0.333455455892639
SUGP2	0.576707	8.51021	3.86688	0.000149758	0.00144846919417735	0.332847849137735
C1orf216	0.819418	7.04251	3.85988	0.000153798	0.00148593357989388	0.307912243287351
TACC3	-0.981108	8.36197	-3.85776	0.000155042	0.00149633493867588	0.300363934480135
DRG1	0.544692	10.1711	3.85479	0.000156806	0.00151171406151009	0.289773659136227
LCP2	-0.910864	8.31176	-3.8526	0.000158111	0.0015226552488051	0.282007519661872
TOP1	-0.832719	9.91999	-3.84885	0.000160379	0.00154282474433675	0.268673754163242
MYO9B	-0.656139	7.44351	-3.84711	0.00016144	0.00155028883490519	0.26249812975778
SQSTM1	-0.628613	8.60026	-3.84701	0.000161503	0.00155028883490519	0.262134819271863
TARDBP	0.701521	9.68379	3.84659	0.000161759	0.00155107176852225	0.260653720842336
ACSL5	-0.710918	7.89886	-3.84606	0.000162084	0.00155252420386288	0.258770127740628
SLC12A6	-1.14259	6.91888	-3.84499	0.000162743	0.001557154253524	0.254975971382672
IRF8	-1.66796	9.60385	-3.84423	0.000163215	0.00155999916112484	0.252261992017414
ICE1	0.781943	9.21204	3.84327	0.000163809	0.00156400199857818	0.248858880102155
CSF1R	-1.10198	6.23298	-3.84045	0.000165571	0.00157913076417876	0.238844029851363
COMMD3	0.799309	9.96245	3.83944	0.000166202	0.00158344958687271	0.235285612135584
SIVA1	0.76161	9.11329	3.83868	0.000166683	0.00158633620638494	0.232580063045779
DDAH2	1.14292	9.80125	3.83834	0.0001669	0.00158670819791941	0.231361040486838
DDX52	0.611369	7.63817	3.83241	0.000170686	0.00162096888609022	0.210367498354113
CPQ	-0.969229	6.91485	-3.83089	0.000171667	0.00162855474502127	0.205000629274483
TFEB	-1.07536	7.9137	-3.8277	0.000173751	0.00164657138916392	0.193708187835845
SEC31B	1.27471	7.83743	3.82621	0.00017473	0.00165408467293373	0.188452948249092
RFX7	0.998957	7.27708	3.82458	0.000175814	0.00166257665768015	0.182667289312971
E4F1	0.537457	7.88332	3.82237	0.000177283	0.00167453740651159	0.174876786559595
DHX15	0.686972	11.2723	3.82212	0.000177454	0.00167453740651159	0.173975412643809
PUS3	0.751689	7.5178	3.8202	0.000178738	0.00168487024074808	0.167229123946873
FLII	-0.575441	8.70771	-3.8198	0.00017901	0.00168564670819606	0.165808511718082
KPNA5	0.948431	6.53246	3.81847	0.000179912	0.00169235431504645	0.161104495293621
SLC38A2	0.892607	11.6858	3.81744	0.000180612	0.00169714129362613	0.157474525461787
GPX1	-1.01915	11.8065	-3.81669	0.000181123	0.00170014893162821	0.154831726044516
ZNF706	0.707574	10.0578	3.81477	0.000182437	0.00171068239511767	0.148068345620068
PSMD14	0.745069	9.70067	3.81114	0.000184952	0.00173244452210677	0.135259337437107
GMNN	1.11913	10.0269	3.81047	0.000185415	0.00173495797344909	0.132920209044372
UBN1	-0.551378	8.87418	-3.8094	0.000186169	0.00174018165882419	0.129126232803314
PIM2	-1.30908	8.14124	-3.80626	0.000188379	0.00175874787262825	0.118087026624578
ZNF266	0.794071	9.84886	3.80602	0.00018855	0.00175874787262825	0.11723947674135
NEK7	1.10998	9.51196	3.80547	0.000188942	0.00176056203202799	0.115296452931914
HMBOX1	0.802278	9.01298	3.80419	0.000189849	0.0017671619449063	0.110819318759659
TBCE	0.583827	7.56836	3.80354	0.000190314	0.0017696395469411	0.10853235131062
DHCR24	1.36004	6.70646	3.80113	0.000192048	0.00178390209707824	0.10004989364907
TYMP	-1.16928	6.4773	-3.79854	0.000193929	0.00179852510235375	0.0909333815819204
TTPAL	-0.833576	6.99375	-3.7984	0.000194026	0.00179852510235375	0.0904678407369008
NEU1	1.10655	7.85494	3.79361	0.000197553	0.00182931552244882	0.0736238278447994
C20orf27	-1.04253	7.44462	-3.7872	0.000202357	0.00187185337030288	0.0511628007946818
NR1D2	-1.17982	7.15717	-3.78644	0.000202938	0.00187527953131052	0.0484832316569745
TMBIM6	-0.606852	10.6243	-3.78503	0.000204006	0.00188319275849414	0.043578019038117
TDG	0.840658	9.91861	3.78188	0.000206431	0.0019036126225006	0.0325295651132409
TMEM39B	0.664576	8.08179	3.7791	0.000208591	0.00192154044511022	0.0228018636516829
EGLN1	-1.12933	7.18546	-3.77718	0.00021009	0.00193251408406223	0.0161120947785429
VRK2	-0.687077	8.06012	-3.77702	0.000210216	0.00193251408406223	0.0155491529517997
PRPF4B	0.792668	9.39158	3.77657	0.000210574	0.0019338099154472	0.013958829913526
SNRPD1	0.62033	9.80225	3.77283	0.000213539	0.00195901273266141	0.000896174812728745
UBAC1	-0.803845	8.28689	-3.77245	0.000213837	0.00195973402387057	-0.000409611
ZNF12	0.855749	8.70722	3.77059	0.00021533	0.00197138431875532	-0.00690864
ANXA5	-2.56969	8.5513	-3.76924	0.000216424	0.00197774610790161	-0.0116452
SAMHD1	-1.5913	6.78465	-3.76904	0.000216583	0.00197774610790161	-0.0123331
CCT6A	0.687819	9.75525	3.76891	0.000216691	0.00197774610790161	-0.0127952
MBP	-0.683163	7.12605	-3.76798	0.000217444	0.00198259139360136	-0.0160381
HNRNPDL	0.512016	10.7975	3.76691	0.000218311	0.00198846066854661	-0.0197556
ZNF273	0.86402	8.11983	3.7663	0.000218812	0.00198988782345913	-0.0218972
STAT3	-0.934884	8.80972	-3.76617	0.000218914	0.00198988782345913	-0.0223345
MICU1	-0.595904	8.25066	-3.76532	0.000219614	0.00199420951056179	-0.025314
KLF11	-1.78623	7.28431	-3.75906	0.000224802	0.00203676005744148	-0.0471249
IGLC1	-1.42584	8.30425	-3.75862	0.000225171	0.00203676005744148	-0.0486573
GLTSCR1L	-0.678785	7.68114	-3.7586	0.00022518	0.00203676005744148	-0.0486955
AKR1A1	0.738009	10.3194	3.75856	0.000225214	0.00203676005744148	-0.0488369
ZNF134	0.924464	7.63763	3.75662	0.000226854	0.00204950897849393	-0.0556127
NCK2	-0.758991	9.38376	-3.7558	0.000227543	0.00205364927915211	-0.0584443
SUPT4H1	-0.565509	9.34855	-3.75395	0.000229117	0.00206576366059941	-0.0648832
SERPINA1	-2.19183	6.731	-3.75237	0.000230466	0.002075824417256	-0.0703652
SEPHS2	0.773103	9.66168	3.74946	0.000232981	0.0020963586251516	-0.080501
RBM23	-0.663079	9.31941	-3.74845	0.000233859	0.00210213875950849	-0.0840149
GLRX2	-0.949082	7.65139	-3.74256	0.000239031	0.00214645611819174	-0.104436
CACYBP	0.648634	8.96158	3.74065	0.000240733	0.00215780539046374	-0.111062
MINK1	-0.64858	7.18365	-3.7406	0.000240779	0.00215780539046374	-0.11124
POMT1	0.869561	7.08522	3.7389	0.000242303	0.00216927813155987	-0.117129
SMARCA5	0.695319	8.94672	3.73689	0.000244114	0.00218330014694483	-0.124081
PLAU	-1.47537	5.89236	-3.73635	0.00024461	0.00218553822567863	-0.125974
ACVR2B	0.799155	6.77348	3.73582	0.000245086	0.00218760440262567	-0.127792
RTCB	0.506557	9.72942	3.73542	0.000245446	0.00218862015092024	-0.12916
ATP8B2	0.770875	7.79209	3.73501	0.000245823	0.00218978975451149	-0.130593
UBR5	0.737409	8.70012	3.7333	0.000247387	0.00220152418023151	-0.136514
THBD	-1.71025	4.93252	-3.73287	0.000247782	0.00220283511059168	-0.138002
FLNA	-1.17693	8.82595	-3.73109	0.000249423	0.00221521590875279	-0.144164
METAP2	0.67997	8.9116	3.72967	0.000250737	0.00222337095772394	-0.149068
LILRB3	-1.04184	7.68091	-3.72956	0.000250841	0.00222337095772394	-0.149452
NCOA4	-0.606725	11.9468	-3.72919	0.000251185	0.00222421247241338	-0.150733
SLC41A3	0.522888	8.06425	3.72677	0.000253449	0.00224202944525503	-0.159106
MFSD6	1.1738	6.76684	3.72267	0.000257316	0.00227398232230653	-0.173238
COL18A1	-0.966296	6.50165	-3.72134	0.000258591	0.00228297854522632	-0.177847
ARMCX6	0.688575	9.77034	3.71786	0.000261935	0.00231021147991704	-0.189835
G3BP1	0.435779	8.21549	3.71752	0.000262268	0.00231086383236364	-0.191021
SPG21	-0.531564	9.41669	-3.71556	0.000264173	0.00232480904371946	-0.197773
KLF5	-1.61431	5.84016	-3.71536	0.000264373	0.00232480904371946	-0.198478
GZMA	-1.83284	7.97429	-3.71333	0.000266362	0.00233999186990645	-0.205471
SNUPN	0.584881	8.58226	3.71296	0.000266724	0.00234086581517604	-0.206739
RBM15B	0.684979	8.75115	3.71267	0.000267007	0.00234103971715482	-0.207727
SERPINB10	-2.15954	5.56189	-3.70695	0.000272706	0.0023886548831973	-0.227425
RAN	0.599422	10.7695	3.70649	0.000273169	0.00239036541119676	-0.229009
PPP1R8	0.590776	9.50786	3.70597	0.000273695	0.00239261673528936	-0.230803
EDEM2	-0.534898	7.69424	-3.70165	0.000278082	0.00242858285413078	-0.245632
NPM3	0.929972	8.14685	3.7012	0.000278545	0.00243023959918858	-0.247182
NUBP1	-0.617783	8.07417	-3.69736	0.00028251	0.00246242232550313	-0.260361
TCEAL1	0.949684	8.48381	3.69573	0.000284214	0.00247486026067496	-0.265971
FAM50A	-0.833594	8.60835	-3.69498	0.00028499	0.00247919091171979	-0.268512
RAB15	1.12073	7.94043	3.69176	0.000288392	0.0025053712748252	-0.279576
NUDC	0.446031	9.04932	3.6916	0.000288562	0.0025053712748252	-0.280124
FASTKD1	0.920106	8.29802	3.68694	0.000293543	0.00254613158231289	-0.296076
PWP1	0.445711	9.23402	3.68505	0.000295588	0.00256137885815533	-0.302548
MINPP1	-1.73328	6.32203	-3.68288	0.000297952	0.0025793519246313	-0.309972
HLA-G	-1.18692	11.3887	-3.68239	0.000298484	0.00258145619749231	-0.311637
GSTO1	-0.834225	10.4744	-3.68002	0.000301088	0.00260144977129791	-0.319732
UROD	-0.666162	8.09531	-3.6761	0.000305451	0.00263658330457813	-0.333136
TUBB6	-1.94859	7.57372	-3.6746	0.000307127	0.00264849074964342	-0.338237
FAM193A	0.589318	9.21689	3.67313	0.000308796	0.0026603003314775	-0.343284
HMGXB4	0.626591	9.16282	3.67208	0.000309975	0.00266788074937965	-0.346836
PIK3CB	-0.846462	6.5284	-3.67172	0.00031039	0.00266887069896558	-0.348081
SQRDL	-1.22787	8.84237	-3.67094	0.000311272	0.00267387441452256	-0.350725
TOPORS-AS1	-0.686778	8.0065	-3.66961	0.000312796	0.00268438212006719	-0.355277
SWAP70	-0.928772	7.99055	-3.6685	0.000314073	0.00269274682466314	-0.359073
SARS	0.513094	8.97178	3.66791	0.000314748	0.00269593481948881	-0.361071
POLD4	-0.792486	8.48418	-3.66695	0.000315853	0.00270279976619134	-0.364336
TSPAN14	-0.961328	9.19795	-3.66411	0.000319146	0.00272836284763619	-0.373999
C12orf43	0.540867	7.74511	3.66173	0.00032194	0.00274892355437795	-0.382119
CTPS1	0.819881	8.35182	3.66153	0.000322168	0.00274892355437795	-0.382778
HSF2	0.867254	7.28907	3.66106	0.000322721	0.00275100701464848	-0.384376
NR1H2	-0.836776	7.76225	-3.66029	0.000323634	0.00275332215079817	-0.387007
RABGGTB	0.834506	9.17235	3.66027	0.00032366	0.00275332215079817	-0.387081
SOCS3	-1.24499	5.89872	-3.65986	0.000324146	0.00275332215079817	-0.388479
AOAH	-1.29782	6.72347	-3.65972	0.000324316	0.00275332215079817	-0.388966
LILRA3	-2.27659	5.868	-3.65935	0.000324752	0.00275332215079817	-0.390217
IQCB1	0.547314	8.53779	3.65927	0.000324848	0.00275332215079817	-0.390491
PJA2	-0.779872	9.4626	-3.6564	0.00032827	0.00277968485232565	-0.400252
EIF4G3	-0.675722	7.62438	-3.65412	0.000331012	0.00279942661179167	-0.407998
KCTD9	0.962343	8.26854	3.65394	0.00033123	0.00279942661179167	-0.408611
C15orf39	-0.973806	7.46872	-3.65007	0.00033593	0.00283645510927667	-0.42173
OAT	-1.23717	9.58407	-3.6485	0.000337859	0.00285004913709419	-0.427063
NAA10	0.549706	8.83972	3.64648	0.000340349	0.00286678771331601	-0.433897
SGSH	-1.27403	6.95133	-3.64637	0.000340487	0.00286678771331601	-0.434277
BSG	-1.14684	8.04863	-3.64589	0.000341082	0.00286907844158779	-0.4359
COX6C	0.486156	12.7216	3.64512	0.000342042	0.00287444664704906	-0.438519
HNRNPA0	0.690588	10.4956	3.64168	0.000346352	0.00290791923585565	-0.450174
CST3	-1.06239	7.35743	-3.63918	0.000349514	0.0029291205227995	-0.458634
TM6SF1	-1.50545	5.69083	-3.63916	0.000349535	0.0029291205227995	-0.458689
FAT1	3.339	6.79255	3.63792	0.000351122	0.0029396608650535	-0.462907
ZFAND6	-0.66146	9.65031	-3.63714	0.00035212	0.00294524363820101	-0.465548
BLMH	0.762878	8.74203	3.63616	0.00035337	0.00295292522376185	-0.468845
KIF1B	-0.93866	6.78046	-3.63579	0.000353846	0.00295413705903261	-0.4701
SDCBP	-0.978927	10.8146	-3.63469	0.000355259	0.00296315632075438	-0.473809
WNK1	0.667501	7.91887	3.63213	0.000358582	0.00298807166134294	-0.482472
CXCR4	-1.05858	12.8944	-3.63117	0.000359833	0.00299569268154639	-0.485712
HDAC1	0.678833	10.7532	3.63064	0.00036053	0.00299869037459975	-0.487512
LSM6	-0.79006	9.3197	-3.62971	0.000361746	0.00300599793576464	-0.490646
MAX	-0.670076	8.68888	-3.62924	0.000362363	0.00300832307090795	-0.492233
CSTF3	0.70866	8.17728	3.62797	0.000364037	0.00301940853914213	-0.496522
OSBPL3	1.04005	6.55531	3.62751	0.000364648	0.00302166105658409	-0.498082
FOLR3	-2.2187	6.14382	-3.62653	0.000365943	0.00302752292215585	-0.501381
NFE2	-1.96927	6.89137	-3.62646	0.000366035	0.00302752292215585	-0.501614
KLF2	-1.43958	10.9349	-3.62545	0.00036738	0.00303498645735846	-0.505027
CTRL	-0.543226	6.36945	-3.62527	0.000367619	0.00303498645735846	-0.505631
FDPS	0.725407	10.0049	3.62442	0.00036875	0.00304150132141755	-0.508488
ADAP2	-0.720943	7.03019	-3.62295	0.000370731	0.00305501514583167	-0.513474
SEC14L1	-0.953749	7.83753	-3.61958	0.000375274	0.00308959344904898	-0.524804
KBTBD2	-0.71536	8.91739	-3.61587	0.000380355	0.00312853735011583	-0.537315
IGJ	-2.40849	8.11434	-3.61505	0.000381482	0.00313490548433933	-0.540064
FFAR2	-1.79422	5.16523	-3.61447	0.00038229	0.00313865601236253	-0.542034
SLC35A2	-0.537516	6.53216	-3.61418	0.00038268	0.00313896410561732	-0.542982
SASH3	-0.874589	10.3961	-3.61275	0.00038467	0.0031523816199973	-0.547805
IGFBP7	-1.72331	7.17739	-3.61244	0.000385107	0.00315306761057274	-0.548863
RNPEP	-0.763543	9.081	-3.61081	0.000387373	0.00316870268105067	-0.554317
CMC2	0.671534	9.98808	3.60695	0.000392824	0.00321034501610634	-0.567312
ZNF140	0.837615	7.19502	3.60551	0.000394861	0.00322403582934958	-0.572121
AGPAT2	-0.744185	7.69591	-3.60142	0.000400739	0.00326902961155789	-0.585859
UGP2	0.767325	10.1295	3.59871	0.000404667	0.00329805775623486	-0.594928
FAHD2A	0.514921	8.19744	3.59832	0.000405235	0.00329966849868648	-0.596232
IL6R	-1.77765	5.31554	-3.59771	0.000406131	0.00330394132912915	-0.598285
PTGES3	0.526536	12.2481	3.597	0.000407169	0.00330936486437128	-0.600658
PANX1	0.816791	7.31759	3.59566	0.000409148	0.00332086861135452	-0.605164
AIMP1	0.54729	9.25287	3.59551	0.000409365	0.00332086861135452	-0.605658
SMARCC1	0.656806	9.10022	3.59528	0.000409703	0.00332086861135452	-0.606424
NELL2	-1.2424	6.93803	-3.59337	0.000412533	0.00334076329819627	-0.612822
ANP32A	-0.730654	10.0652	-3.59019	0.000417285	0.00337617695155779	-0.623466
CHMP2B	-0.673275	8.56998	-3.58754	0.000421283	0.00340543822622151	-0.63233
CEBPA	-1.85198	7.06395	-3.58624	0.000423258	0.00341829939508704	-0.636676
SPTAN1	0.906487	8.10715	3.58582	0.000423897	0.00342036127410779	-0.638078
TRIM68	0.551839	7.77624	3.58412	0.000426496	0.00343821043734797	-0.643756
SLC7A6	0.609749	7.27948	3.58053	0.000432033	0.00347725010140438	-0.655742
NFKB1	-0.939918	9.15356	-3.58047	0.000432119	0.00347725010140438	-0.655927
PARG	0.614825	7.44101	3.57967	0.000433371	0.00348417642133308	-0.658614
RANBP2	0.828333	9.00122	3.57916	0.000434162	0.00348738746717526	-0.660308
ZC3HAV1	0.764557	9.61639	3.57861	0.000435013	0.00348950081805995	-0.662127
QKI	-0.73234	8.18867	-3.57844	0.000435291	0.00348950081805995	-0.662721
NUDT21	0.634182	8.40633	3.57824	0.0004356	0.00348950081805995	-0.663381
RRAGD	-1.12485	8.17182	-3.5777	0.000436437	0.00349156093547104	-0.665164
TICAM1	-0.963372	6.52834	-3.57757	0.000436641	0.00349156093547104	-0.665598
TRIM33	0.633068	8.26632	3.57654	0.000438267	0.00350141857405727	-0.669051
TNFAIP6	-1.71483	5.42464	-3.57557	0.000439787	0.00351041711742506	-0.672268
PTEN	0.611662	9.20959	3.57496	0.000440759	0.00351502721713428	-0.674319
AMD1	0.758158	9.97819	3.57255	0.000444584	0.00354034657790891	-0.682344
RPL24	0.313233	13.9194	3.57246	0.000444729	0.00354034657790891	-0.682648
ADH5	0.641248	9.15717	3.57194	0.000445556	0.00354101436539888	-0.684374
EHBP1L1	-0.764998	7.24717	-3.57191	0.000445608	0.00354101436539888	-0.684482
TSNAX	-0.826254	9.02491	-3.56977	0.00044904	0.00356510506903994	-0.691607
CAPZA1	-0.501089	10.2798	-3.56757	0.000452584	0.00359003995145079	-0.698908
YEATS4	0.830768	8.14065	3.56679	0.000453854	0.0035969151679512	-0.701511
RBM38	-1.53366	9.59423	-3.56414	0.000458171	0.00362789693599286	-0.710301
POMP	0.531109	10.6381	3.55779	0.000468698	0.00370795900763462	-0.731394
CD79A	-1.69654	9.66886	-3.55625	0.000471291	0.00372516185701155	-0.736515
GPR18	-1.53322	7.10974	-3.55551	0.00047254	0.00373172863697942	-0.738974
CEACAM3	-0.769513	6.36551	-3.55413	0.000474874	0.00374683354283706	-0.743546
WBP5	2.5047	7.57414	3.55216	0.000478225	0.00376993983620642	-0.750075
GGTLC1	-0.501632	6.39531	-3.55168	0.000479042	0.0037730384055983	-0.751659
KAT2B	-0.945371	8.1014	-3.55012	0.000481717	0.00379075147627272	-0.756826
TOMM70A	0.521243	8.58778	3.5489	0.000483812	0.00380388400476001	-0.760856
ANXA7	-0.582508	9.90971	-3.54722	0.000486721	0.00382337654191315	-0.766419
ATP5C1	0.483641	10.7452	3.54242	0.000495124	0.00388568139995227	-0.782304
TAF4B	1.16632	6.45566	3.54219	0.000495525	0.00388568139995227	-0.783055
PPA1	1.12018	11.2502	3.54171	0.000496385	0.00388900675348967	-0.784665
PELP1	0.664827	7.60661	3.541	0.00049763	0.00389302363935277	-0.786988
ARHGDIB	-0.5206	12.544	-3.54092	0.000497772	0.00389302363935277	-0.787253
ABHD17A	-0.728184	9.92672	-3.53937	0.000500531	0.00391116817845178	-0.792382
URI1	0.459878	8.39486	3.53853	0.000502023	0.00391938361721387	-0.795143
UBA5	0.546616	7.85708	3.53737	0.000504112	0.00393224953920958	-0.798996
PTGS1	-1.05879	6.05489	-3.53393	0.000510311	0.00397712337753208	-0.810335
SCAMP2	-0.532291	8.82474	-3.53117	0.000515352	0.00401290177861268	-0.819454
RAD21	0.513011	10.578	3.53067	0.000516261	0.00401646497997251	-0.821088
IL2RB	-1.15507	8.08771	-3.52821	0.000520787	0.00404814009101997	-0.829184
QSER1	0.743705	6.34232	3.52769	0.000521757	0.00405214684318423	-0.830911
NUP160	0.67776	7.47964	3.52499	0.000526776	0.00408755973804186	-0.839789
ANAPC5	0.454623	9.51337	3.5247	0.000527319	0.00408821302077366	-0.840745
TIMP1	-1.58316	8.90014	-3.52338	0.000529801	0.00410388761222438	-0.8451
CD36	-1.95271	5.94544	-3.52227	0.000531893	0.00411651315209669	-0.848755
UBFD1	0.638354	7.42082	3.522	0.000532392	0.00411679504758781	-0.849624
DBR1	0.689316	7.37392	3.52114	0.000534016	0.00412577029423358	-0.852448
PTGES	-0.982451	6.05355	-3.51924	0.000537629	0.00414832730739967	-0.8587
EML4	-1.01693	6.75333	-3.51912	0.000537867	0.00414832730739967	-0.85911
CEBPE	-1.15891	6.78294	-3.51101	0.000553529	0.00426356553447273	-0.885721
C18orf25	0.60047	6.18639	3.51089	0.000553766	0.00426356553447273	-0.886118
RAB8A	-0.759293	10.1774	-3.50947	0.00055656	0.00428137980138076	-0.890783
BPGM	-1.25029	7.50574	-3.50827	0.000558922	0.00429583664606093	-0.894708
ESD	0.455889	10.2558	3.50719	0.000561056	0.00430852165123269	-0.89824
CSPP1	0.523797	6.9259	3.50652	0.000562394	0.00431310987773963	-0.900448
MANSC1	-1.71938	5.3928	-3.5064	0.000562622	0.00431310987773963	-0.900823
ABL1	0.760786	9.07172	3.50443	0.000566564	0.00433959732492162	-0.907295
NUCB2	1.08568	10.3277	3.50354	0.00056834	0.00434945844005834	-0.910195
SPRY1	1.69836	9.68	3.50181	0.000571833	0.00437243566321217	-0.915874
GCFC2	0.710693	7.10868	3.50053	0.000574423	0.0043884749518275	-0.920062
SETD1B	-0.747426	9.99899	-3.50025	0.000574975	0.00438892472688795	-0.920951
CREBL2	-0.67539	7.09175	-3.49694	0.000581743	0.00443530762463266	-0.931794
ADPGK	-0.562152	9.42132	-3.49679	0.000582047	0.00443530762463266	-0.932279
PARVB	-1.03952	5.79237	-3.49625	0.000583155	0.00443995348463547	-0.934041
PSMC2	0.44746	8.82557	3.49566	0.000584372	0.00444255512281418	-0.935972
LRPPRC	0.588143	9.35231	3.4956	0.000584494	0.00444255512281418	-0.936166
ERP29	-0.749446	11.0616	-3.49351	0.000588812	0.00447155688326482	-0.942985
DDHD2	0.851773	8.17163	3.49318	0.000589508	0.00447161809160048	-0.944079
LRRC42	0.605101	7.58609	3.49303	0.000589824	0.00447161809160048	-0.944576
ZNF510	0.506797	7.00034	3.48863	0.000599022	0.00453748728967982	-0.95891
PPM1A	0.737848	8.68069	3.48697	0.000602534	0.00456021341758649	-0.964324
IGLV1-44	-1.20802	6.60728	-3.48232	0.00061247	0.0046314801957685	-0.979473
ITM2B	-0.631691	11.744	-3.48162	0.000613989	0.00463697898648901	-0.981767
PDS5A	0.586349	8.38099	3.4815	0.000614238	0.00463697898648901	-0.982143
DPH5	0.482114	8.11462	3.4799	0.000617718	0.00465554364169405	-0.987374
CCR9	1.62874	5.79714	3.47988	0.000617743	0.00465554364169405	-0.987411
PTER	0.832888	7.60672	3.47734	0.000623288	0.00469336050877522	-0.995685
SAC3D1	1.2707	8.83641	3.47696	0.000624111	0.00469559109312329	-0.996907
LAMTOR3	-0.631572	8.89043	-3.47535	0.000627661	0.00471831350526664	-1.00216
P4HB	-0.999766	9.99082	-3.47298	0.000632907	0.00475149267985316	-1.00987
C1orf174	0.626417	8.77597	3.47287	0.000633141	0.00475149267985316	-1.01021
CD44	-1.31598	8.01013	-3.47136	0.000636515	0.0047727927513537	-1.01513
PLXNC1	-1.13375	6.02415	-3.47058	0.000638254	0.00478180345950266	-1.01765
GEMIN2	0.553028	7.15455	3.46952	0.000640629	0.00479556216357397	-1.02109
RAB33B	0.686773	7.91174	3.46449	0.000652016	0.0048707168042591	-1.0374
NKRF	0.741216	8.11785	3.46441	0.000652202	0.0048707168042591	-1.03766
UNC50	-0.684681	8.38647	-3.46436	0.000652309	0.0048707168042591	-1.03781
CHRNA5	1.00303	5.31083	3.4632	0.000654973	0.00488651578349408	-1.04159
GMPR	-1.69925	5.48177	-3.46287	0.000655721	0.00488800141961713	-1.04264
ARMC1	0.652109	9.11755	3.46215	0.000657395	0.00489638315040749	-1.045
STXBP2	-1.17512	7.29642	-3.46161	0.000658629	0.00490147615688042	-1.04674
HEXIM1	0.809701	8.71728	3.46023	0.000661824	0.00492114466301262	-1.05122
LSM7	0.67709	11.424	3.45996	0.000662442	0.0049216285973602	-1.05208
PPP2CB	0.685608	9.16517	3.45534	0.000673225	0.00499757501442447	-1.06702
C1RL	-0.766983	7.34305	-3.4547	0.000674732	0.00500459325645558	-1.06909
DCTD	0.638935	8.50034	3.45291	0.000678964	0.00503178988551138	-1.07487
ECRP	-1.75727	6.52505	-3.44909	0.000688082	0.00509239505480897	-1.08721
CDADC1	-0.905377	6.20591	-3.44901	0.000688285	0.00509239505480897	-1.08749
KPNA2	0.652175	10.8811	3.44572	0.000696222	0.00514584089016468	-1.09809
CDV3	-0.684279	9.23067	-3.44554	0.000696664	0.00514584089016468	-1.09868
RAB28	0.611034	7.1166	3.4444	0.000699441	0.00515793944327989	-1.10236
CD59	-0.936905	8.11117	-3.44439	0.00069946	0.00515793944327989	-1.10238
ANKRD46	0.893186	7.29334	3.44245	0.00070421	0.00518866719237456	-1.10864
PSMA4	0.576011	11.0939	3.43799	0.000715232	0.00526306463337419	-1.123
ACTR5	0.61155	7.57354	3.43789	0.000715488	0.00526306463337419	-1.12334
MPHOSPH9	0.689475	7.62022	3.43649	0.000718981	0.00528098824521291	-1.12784
TUBB1	-1.96756	4.2841	-3.43644	0.000719111	0.00528098824521291	-1.128
ZNF84	0.723045	8.09038	3.43476	0.00072332	0.00530752689468838	-1.1334
GMIP	-0.62148	7.90339	-3.4333	0.00072701	0.00533021036541592	-1.13811
SSRP1	0.657182	9.36154	3.43237	0.000729357	0.00534301963573116	-1.14109
DPAGT1	-0.655351	7.57273	-3.43143	0.000731742	0.00535608781679234	-1.1441
ENOPH1	0.543833	9.78766	3.43096	0.000732958	0.00536058433594895	-1.14564
TMEM63A	-0.453881	6.73474	-3.42982	0.000735862	0.00537740913846814	-1.14929
SLC25A5	0.481978	12.8941	3.42618	0.00074522	0.00544132934924544	-1.16097
PNPLA6	-0.693156	7.4171	-3.42534	0.000747407	0.00545210993010229	-1.16368
UBE2D2	0.414096	9.40489	3.42514	0.000747921	0.00545210993010229	-1.16432
FZD6	2.05462	7.13421	3.42464	0.000749205	0.00545700650097426	-1.1659
CBX1	1.65482	9.49743	3.42023	0.000760766	0.00553668249151767	-1.18005
ATIC	0.938024	9.65699	3.41403	0.000777302	0.00565241229558432	-1.19992
GNPTAB	0.719724	7.89808	3.41255	0.000781294	0.00567681051703098	-1.20466
KHNYN	-0.583169	8.46756	-3.41175	0.000783448	0.00568781843631659	-1.2072
RAP1GDS1	0.658888	8.19493	3.4109	0.000785772	0.00570004587480176	-1.20993
HTATSF1	0.501593	8.61575	3.41035	0.000787247	0.00570609759767025	-1.21167
SRP19	0.513808	10.5203	3.4099	0.000788493	0.00571048664543949	-1.21313
ITPKB	-0.850162	7.13174	-3.40894	0.00079111	0.00572478346529298	-1.21619
ABCA7	-0.808081	7.54674	-3.40842	0.000792542	0.00573049185246128	-1.21786
TOPORS	0.838632	8.83695	3.40721	0.000795863	0.00574983590807637	-1.22172
RNF10	-0.592894	9.56637	-3.40413	0.000804386	0.00580670542079305	-1.23156
MAPKAPK5-AS1	0.605097	8.24794	3.40326	0.000806799	0.00581520872823608	-1.23433
FXYD5	-0.871425	11.0069	-3.40323	0.00080687	0.00581520872823608	-1.23441
MGRN1	-0.776786	8.41037	-3.40237	0.000809271	0.00582779758190858	-1.23715
CSTF2T	0.655921	8.02394	3.40107	0.000812914	0.00584930651929945	-1.2413
RIC8B	0.565791	7.08565	3.40004	0.00081583	0.00586554767773692	-1.24461
TERF1	0.637601	8.72406	3.39969	0.000816814	0.00586788442806321	-1.24572
UNG	1.00876	8.90883	3.39813	0.000821221	0.00589478944722672	-1.25069
RNPEPL1	-0.531652	7.86632	-3.39377	0.000833643	0.00597914228244822	-1.26455
CALCOCO1	-0.646955	7.92136	-3.39153	0.000840113	0.00602069888396641	-1.27169
ZNF614	0.641063	6.57573	3.38742	0.000852103	0.00610171150467369	-1.28476
LSM1	0.590883	10.0376	3.38166	0.000869137	0.00621869054353881	-1.30303
LUC7L	0.603462	8.00553	3.38101	0.000871104	0.00622776587984988	-1.30512
TNFRSF1A	-0.984709	8.4136	-3.38006	0.000873935	0.00624299363484547	-1.30811
SLC16A1	0.765444	6.85462	3.3789	0.000877442	0.00626153846997497	-1.31181
MAFG	-0.639353	8.06843	-3.37873	0.000877937	0.00626153846997497	-1.31233
RBMX2	0.582488	7.99734	3.37301	0.000895367	0.00638074510423584	-1.33046
LIN7C	0.627719	8.02679	3.37229	0.000897572	0.00638733002089488	-1.33273
SDR39U1	0.580028	9.79324	3.37224	0.000897725	0.00638733002089488	-1.33289
MACF1	0.643366	9.19959	3.37144	0.000900195	0.00639802584376773	-1.33542
SMIM7	0.434442	8.17521	3.37129	0.000900665	0.00639802584376773	-1.33591
ALAD	-0.602491	7.02633	-3.36971	0.000905553	0.00642762403124446	-1.3409
MICAL1	-0.968625	9.63354	-3.3692	0.00090715	0.00643383158393193	-1.34252
MRPS30	0.436227	7.98454	3.3677	0.000911825	0.00646184380752082	-1.34727
CAMLG	0.576654	10.4624	3.36296	0.00092674	0.00656232069900176	-1.36223
MGST2	-0.880178	8.71024	-3.36265	0.000927719	0.00656403866086793	-1.3632
DGKD	-0.76005	9.46318	-3.36191	0.000930081	0.00657552263498443	-1.36555
TYMS	1.00908	11.3697	3.36033	0.000935123	0.00660592703437695	-1.37053
HOMER3	-0.950386	6.0577	-3.3583	0.000941619	0.00664655020033591	-1.37692
LRP8	0.729458	7.26726	3.35625	0.000948246	0.00668802371342759	-1.38338
EIF3M	0.468878	9.17222	3.35545	0.000950848	0.00670107326282841	-1.38591
TMC6	-0.75719	7.93436	-3.35477	0.000953056	0.00671131994289364	-1.38804
SYNE1	-0.983927	5.33655	-3.35408	0.000955314	0.00672190612546378	-1.39023
CD1A	1.67071	6.70859	3.35255	0.00096031	0.00675172760361583	-1.39503
LILRA5	-1.25776	5.99048	-3.35129	0.000964445	0.00677545594407436	-1.399
CGRRF1	-0.630419	7.92192	-3.3492	0.000971352	0.00681859999820959	-1.40557
SNX4	0.545164	8.26169	3.34704	0.000978552	0.00686373010838932	-1.41238
SLC16A5	-0.596534	6.09476	-3.34624	0.000981216	0.00687700072947776	-1.41488
KIF2A	0.675537	7.78522	3.34555	0.000983548	0.00688792949688339	-1.41707
PARP4	-0.610388	9.02108	-3.34374	0.000989623	0.0069250316823578	-1.42275
SRP14	0.353047	12.5462	3.34323	0.000991349	0.00693165853749435	-1.42435
TMEM8A	-0.819093	7.63406	-3.34192	0.000995798	0.00695730738623732	-1.42848
SLC25A3	0.401223	11.2233	3.34135	0.00099772	0.00696527097279877	-1.43025
NFYA	0.727405	7.54345	3.33925	0.00100487	0.0070096811295269	-1.43683
NCBP2	0.57932	8.35223	3.33846	0.00100759	0.00702316761380188	-1.43932
HLTF	0.936868	9.04963	3.33747	0.001011	0.00704141448089223	-1.44243
MIIP	-0.585533	7.95418	-3.33616	0.00101552	0.00706735617422638	-1.44654
NFYB	0.585089	7.59064	3.33561	0.00101741	0.00707502050086219	-1.44826
ZNF423	2.23263	8.45938	3.33511	0.00101913	0.00708146962033329	-1.44982
VBP1	0.659501	10.6558	3.3333	0.00102545	0.00711976875623402	-1.4555
PRPSAP2	0.51304	9.12441	3.33298	0.00102653	0.00712177781722681	-1.45648
RFWD3	0.812683	7.5958	3.33061	0.00103485	0.00717390463705196	-1.46392
WHSC1	0.684543	7.9867	3.32916	0.00103997	0.00720374325595814	-1.46846
CASP1	-1.32334	7.84326	-3.32774	0.00104498	0.0072328239756398	-1.47288
FOXJ3	0.528975	7.75925	3.32535	0.0010535	0.00728619029655123	-1.48037
FTO	0.814103	8.91578	3.32254	0.0010636	0.0073503117305579	-1.48915
IL10RB	-0.766482	8.45956	-3.32191	0.00106587	0.00736029450882889	-1.49111
TESPA1	0.93895	6.81905	3.32137	0.00106781	0.00736797494756295	-1.49279
ZMYM4	0.565981	8.29991	3.31969	0.00107391	0.0074043343666478	-1.49803
CAMKK2	-0.553746	7.39864	-3.31922	0.00107563	0.00741045150353391	-1.4995
TUBA1B	0.432225	13.0023	3.31861	0.00107785	0.00741999457091073	-1.5014
ACTB	-0.624308	13.8168	-3.31609	0.00108712	0.00747800708692166	-1.50928
ARL4A	-1.32842	7.92884	-3.31548	0.00108937	0.00748772329210946	-1.51119
DIS3	0.588237	6.92411	3.31521	0.00109037	0.0074888410209785	-1.51203
CARKD	0.958507	8.3433	3.3147	0.00109223	0.00749579047177653	-1.5136
PCTP	-0.78811	8.16749	-3.31347	0.00109679	0.0075212958112025	-1.51743
SLA	-1.29468	8.52628	-3.31298	0.0010986	0.00752795228698575	-1.51895
RBBP8	0.863522	9.28733	3.30942	0.00111191	0.00761330998456182	-1.53004
ITM2A	2.17602	9.81501	3.30837	0.00111588	0.0076346123987422	-1.53332
WAS	-0.767285	8.60357	-3.30737	0.00111965	0.00765448993867144	-1.53642
TUBA1A	0.816558	12.801	3.30594	0.00112507	0.0076856728076129	-1.54086
VNN3	-1.78248	4.08798	-3.30553	0.00112663	0.00769046654985092	-1.54214
TMEM135	0.609778	6.97683	3.30472	0.00112973	0.00770571863495188	-1.54467
ATAT1	0.74677	6.59514	3.30408	0.00113217	0.00771640739518937	-1.54665
SELENBP1	-1.85418	6.02031	-3.30024	0.00114697	0.00781130300324552	-1.5586
PPP2R5B	-0.552727	6.74584	-3.29634	0.00116215	0.00790211764204853	-1.5707
DMTF1	0.707166	9.68363	3.29607	0.0011632	0.00790211764204853	-1.57152
MRPS2	0.602413	8.13803	3.29604	0.0011633	0.00790211764204853	-1.5716
PNN	0.47583	10.5974	3.2959	0.00116385	0.00790211764204853	-1.57204
ARHGAP5	0.789681	7.15211	3.29439	0.0011698	0.00793643942639079	-1.57673
OSTF1	-0.81463	8.53219	-3.29411	0.00117091	0.0079379667302715	-1.5776
C11orf21	-1.2897	7.60868	-3.29335	0.0011739	0.00795217120131886	-1.57995
C2orf47	0.518397	8.92074	3.28998	0.00118733	0.00803700700955117	-1.59041
PEX5	0.699284	7.13585	3.28909	0.00119087	0.00805490447309257	-1.59315
WRB	0.669531	8.89358	3.28826	0.00119421	0.00807136791242964	-1.59572
UTP3	0.767398	8.95511	3.28769	0.00119651	0.0080807658423166	-1.59749
P2RX1	-0.884076	9.28464	-3.28602	0.00120325	0.00812009784260142	-1.60265
SKAP2	-1.30176	7.17953	-3.28551	0.00120528	0.008127687420863	-1.60421
EFTUD1	0.595551	7.91727	3.28517	0.00120668	0.00813093807978296	-1.60527
GLRX	-0.598295	10.9132	-3.28277	0.00121647	0.00819070767091002	-1.6127
BRD7	0.513016	8.87147	3.28218	0.00121889	0.00820081274997067	-1.61453
PTPN6	-1.00708	9.58394	-3.2811	0.00122331	0.00822436380324837	-1.61786
MYLIP	-1.35796	8.82891	-3.27889	0.00123241	0.00827470999760055	-1.62466
H2AFV	0.52406	10.6432	3.27883	0.00123266	0.00827470999760055	-1.62485
WSB2	-0.927898	9.11128	-3.27814	0.00123551	0.00828761418061127	-1.62698
POP7	0.668497	8.68818	3.27711	0.00123979	0.00831006826518165	-1.63016
LPAR6	1.72918	9.33658	3.27141	0.00126375	0.00846424816810041	-1.64774
ERMAP	-0.924445	6.38477	-3.26837	0.00127669	0.00854218713910264	-1.6571
COPS7A	-0.663227	7.52935	-3.26809	0.00127786	0.00854218713910264	-1.65795
PRDX1	0.864226	11.9394	3.268	0.00127826	0.00854218713910264	-1.65824
PEX11B	0.611948	8.45998	3.26603	0.00128672	0.0085922883438209	-1.6643
TMEM14A	0.902428	8.65864	3.26557	0.00128869	0.0085990181440024	-1.6657
RBM28	0.602675	8.42752	3.25886	0.00131797	0.00878314565115256	-1.68634
ARPP19	0.56316	9.39903	3.25879	0.00131826	0.00878314565115256	-1.68654
SVIL	-0.69623	6.84437	-3.25629	0.00132931	0.00885016073290842	-1.69421
ZNF512B	0.866086	7.6278	3.25502	0.00133496	0.00888110693188375	-1.6981
TAZ	-0.565886	8.0083	-3.25381	0.00134039	0.00891057744317275	-1.70183
CCT4	0.442735	10.7132	3.25329	0.00134272	0.00891944453679963	-1.70342
PDLIM1	-1.91606	10.1081	-3.24994	0.00135781	0.00901281857928853	-1.71369
IL16	-0.655592	7.69577	-3.24972	0.0013588	0.00901281857928853	-1.71435
PAX5	-1.42393	10.0484	-3.24908	0.00136169	0.00902187929377799	-1.7163
UNC119B	0.531419	8.51692	3.24897	0.00136219	0.00902187929377799	-1.71664
TNFAIP2	-1.05279	6.50637	-3.24849	0.00136436	0.00902947857159789	-1.7181
CHORDC1	0.793672	8.77356	3.24669	0.00137259	0.00907723337284609	-1.72362
CD72	-1.29073	8.01227	-3.24479	0.0013813	0.00912803887712338	-1.72943
DOLPP1	0.445769	8.30837	3.24409	0.00138455	0.00913259404471993	-1.73158
SEH1L	0.696839	9.02707	3.24406	0.00138466	0.00913259404471993	-1.73166
MSH2	0.869282	8.35714	3.24397	0.00138506	0.00913259404471993	-1.73193
CCDC69	-1.26812	8.39017	-3.24055	0.00140094	0.00921985620771563	-1.74239
CCDC92	0.856578	8.3053	3.24052	0.00140109	0.00921985620771563	-1.74248
POLR2H	0.603214	9.11441	3.24031	0.00140204	0.00921985620771563	-1.74311
KDM4B	-0.619825	7.79522	-3.24023	0.00140244	0.00921985620771563	-1.74337
ANKRD17	0.674343	8.35649	3.23989	0.00140402	0.00922343944686719	-1.7444
MAN1A1	-1.30213	7.94527	-3.23922	0.00140715	0.00923723905512367	-1.74645
STAM	0.950108	9.5432	3.23894	0.00140846	0.00923900008362396	-1.7473
BORA	0.822636	7.42169	3.23659	0.00141954	0.00930482986450648	-1.75449
UBR7	0.695763	9.13139	3.23633	0.00142073	0.00930575493429902	-1.75526
PTPLA	1.10117	8.68423	3.23499	0.00142708	0.00934050470959781	-1.75935
NFE2L1	0.45902	8.54036	3.23409	0.00143137	0.00936173073694853	-1.76211
F5	-1.21605	5.18183	-3.23175	0.00144253	0.00942779074088071	-1.76923
RRP1B	0.677344	9.62623	3.23126	0.00144488	0.00943445959448749	-1.77072
ZPR1	0.555731	8.4098	3.2311	0.00144567	0.00943445959448749	-1.77123
FOSL2	-1.72822	6.61449	-3.22986	0.00145163	0.00946639979991528	-1.775
VWA9	0.439161	7.79206	3.22778	0.00146168	0.00952498560011851	-1.78133
AQP1	-1.0582	5.57917	-3.22675	0.00146668	0.00955056170875957	-1.78446
RB1	0.69988	8.35992	3.22558	0.00147237	0.00958062403480785	-1.78801
HBB	-2.19173	12.3251	-3.22239	0.001488	0.00967527387196679	-1.7977
TIMM10B	0.537578	7.41665	3.22101	0.00149483	0.00971255094757138	-1.80189
TUBA1C	0.44535	13.2978	3.22076	0.00149609	0.00971367224900751	-1.80267
AP1S2	-0.868989	8.69107	-3.22003	0.0014997	0.0097300210859689	-1.80488
PHGDH	1.21338	8.07034	3.21738	0.00151291	0.00980857476541523	-1.81292
CSNK2A2	0.591768	8.322	3.21576	0.00152107	0.00985433708037278	-1.81785
NSMCE4A	0.463873	8.74232	3.21381	0.00153089	0.00991076313534759	-1.82375
SH3BGRL3	-0.947794	10.9819	-3.21321	0.00153393	0.00992322555278792	-1.82557
CD163	-1.13338	4.57712	-3.21177	0.00154124	0.00996323744506457	-1.82993
KLRB1	-1.4775	7.49932	-3.20966	0.00155202	0.010025670142315	-1.83632
FECH	-0.96578	7.24914	-3.20708	0.00156533	0.0100979254188406	-1.84414
ABHD2	-0.585799	6.68471	-3.20697	0.00156589	0.0100979254188406	-1.84447
EIF2S1	0.618069	8.89148	3.20683	0.00156661	0.0100979254188406	-1.84489
FAM46A	-1.64751	7.43837	-3.20609	0.00157044	0.0101152958647333	-1.84713
CHTOP	0.421165	8.93971	3.20357	0.00158357	0.0101925095155577	-1.85476
SRPK1	-0.477087	8.49247	-3.19953	0.00160478	0.0103215711323501	-1.86695
EFHC1	0.726204	7.70366	3.19724	0.00161692	0.0103921477846067	-1.87385
NGRN	0.641664	9.48521	3.1965	0.00162091	0.0104103052787211	-1.87611
OSM	-1.71935	5.38169	-3.19499	0.00162896	0.0104544773511827	-1.88065
CRYZ	0.751781	7.98955	3.19475	0.00163027	0.0104553006541051	-1.88138
EDRF1	0.545948	7.06853	3.19415	0.00163349	0.0104684648473978	-1.88319
IFI16	0.853539	10.9933	3.19175	0.00164642	0.0105436965812332	-1.89041
PDK1	-0.986116	6.55621	-3.18862	0.00166346	0.0106452167058586	-1.89985
MAP4	0.486738	7.83918	3.18796	0.00166709	0.0106607705467791	-1.90184
DSE	-0.756111	6.99976	-3.18632	0.00167609	0.0107106401186249	-1.90677
TSPO2	-1.41888	5.80969	-3.18588	0.00167852	0.0107138232310948	-1.9081
SPARC	-1.27149	5.9556	-3.18579	0.001679	0.0107138232310948	-1.90836
CD52	-1.30588	11.3385	-3.18493	0.00168376	0.010736536720003	-1.91095
EVL	0.819177	9.81695	3.1844	0.0016867	0.0107424512313018	-1.91255
KIAA0141	-0.348913	7.70089	-3.18432	0.0016871	0.0107424512313018	-1.91276
SERINC5	1.10387	10.2895	3.18351	0.00169159	0.0107633651673216	-1.9152
PIP5K1B	-0.743061	5.90829	-3.17561	0.00173604	0.011038286902964	-1.93894
POLR2B	0.547886	9.80721	3.17497	0.00173967	0.0110448888655391	-1.94085
INPP5E	0.58209	8.73073	3.17485	0.00174033	0.0110448888655391	-1.9412
MTPAP	0.619289	8.40245	3.17477	0.0017408	0.0110448888655391	-1.94145
SPTA1	-1.33556	7.66871	-3.17407	0.00174481	0.0110624522917601	-1.94355
SEC16A	-0.581505	9.42978	-3.17334	0.00174896	0.0110809268893193	-1.94573
FCGR2A	-0.958858	6.24345	-3.17032	0.00176638	0.0111791729558178	-1.9548
SCD5	0.604191	6.48742	3.17021	0.00176698	0.0111791729558178	-1.95511
CTR9	0.843306	9.47328	3.16927	0.00177245	0.0112058035619193	-1.95793
NIPSNAP1	0.581675	8.72397	3.16899	0.00177407	0.0112080960913863	-1.95877
PMS2P8	0.597003	7.40506	3.16862	0.00177619	0.0112098760117983	-1.95987
GATA3	2.02829	7.36654	3.16851	0.00177687	0.0112098760117983	-1.96021
MIS12	0.620744	8.56402	3.16729	0.00178393	0.0112464597438629	-1.96384
FAM216A	0.802123	8.51854	3.16654	0.00178835	0.011266370501165	-1.96611
MCL1	-0.90063	8.23484	-3.16429	0.00180152	0.0113413202545448	-1.97282
SP100	-0.524817	7.10112	-3.16394	0.00180357	0.0113461968676984	-1.97386
PRPF39	0.727532	8.47471	3.16197	0.00181526	0.0114116642636431	-1.97977
FAIM3	-1.14968	8.61963	-3.16005	0.00182669	0.0114694497105377	-1.98551
LPIN2	-0.494774	8.0894	-3.15999	0.00182703	0.0114694497105377	-1.98568
CNNM3	-0.601755	7.69676	-3.15914	0.00183209	0.0114931346765054	-1.98821
CASP6	0.649738	7.84497	3.15858	0.00183545	0.0115061279424459	-1.98989
FURIN	-0.752539	7.49773	-3.15793	0.00183932	0.011522270968873	-1.99181
OLA1	0.526378	9.78924	3.15615	0.00185008	0.0115778376510215	-1.99714
ASMTL	0.619698	9.03388	3.15603	0.00185079	0.0115778376510215	-1.9975
CCNJ	0.765864	7.2443	3.15562	0.00185326	0.0115851505813888	-1.99872
SMARCD1	0.627096	7.53027	3.15468	0.00185893	0.0116124561480172	-2.00151
RFC1	0.5214	8.55023	3.15323	0.00186773	0.0116532829042366	-2.00583
CYB5R1	-0.520365	7.73008	-3.15318	0.00186808	0.0116532829042366	-2.006
TOR4A	-0.723919	5.78452	-3.15159	0.00187776	0.0117054507385404	-2.01072
CSF2RA	-0.972348	5.11814	-3.1496	0.00188995	0.0117732204784293	-2.01664
WARS	-1.10673	7.88022	-3.14916	0.0018927	0.0117820779955443	-2.01797
BTG2	-0.839393	9.24673	-3.14894	0.00189406	0.0117823381591878	-2.01863
PTCD3	0.540357	8.51192	3.14662	0.0019084	0.0118632643006635	-2.02552
DNMT3B	0.860491	8.03878	3.14497	0.00191865	0.0119186594818188	-2.03042
ICAM3	-1.08736	10.1969	-3.14389	0.00192543	0.0119524315527185	-2.03364
GP1BA	-0.644029	6.63124	-3.14292	0.00193151	0.0119818086822492	-2.03652
HSPH1	1.07982	8.63013	3.14109	0.00194304	0.0120449347888754	-2.04196
MBIP	0.732787	7.5729	3.14028	0.00194812	0.0120680634670493	-2.04435
SMARCC2	0.500269	8.18996	3.13886	0.00195715	0.0121155578954713	-2.04857
CA4	-1.32754	5.49469	-3.13676	0.00197052	0.0121898354269533	-2.05479
BTBD1	0.536929	10.2366	3.13494	0.00198223	0.0122537903037947	-2.06021
EIF3A	0.496084	9.96575	3.13446	0.00198526	0.0122640382955062	-2.06161
FAM49B	-0.526451	8.28714	-3.13415	0.00198729	0.0122680063990694	-2.06253
TIPRL	0.611095	8.32934	3.13347	0.00199169	0.0122867190789411	-2.06456
ERAL1	0.442288	7.72312	3.13285	0.00199572	0.0123030119793711	-2.0664
TTI2	0.554463	7.39826	3.13057	0.00201051	0.0123856419482478	-2.07315
ZNF711	2.57215	6.14889	3.12953	0.00201726	0.0124149612739571	-2.07621
DUS2	-0.418529	7.174	-3.12941	0.00201806	0.0124149612739571	-2.07657
APOO	0.588261	8.20803	3.12674	0.0020356	0.0125142549455421	-2.08448
PXMP2	0.759584	9.19631	3.12556	0.00204338	0.0125534032737154	-2.08796
PEX1	0.517467	6.83025	3.12531	0.00204502	0.0125547951781162	-2.08869
GBE1	-0.864323	9.06612	-3.12044	0.00207749	0.0127453699713783	-2.10308
ECHDC3	-1.19821	6.06231	-3.1185	0.00209058	0.0128081258450063	-2.10881
RHOH	0.778181	10.2497	3.11845	0.00209093	0.0128081258450063	-2.10896
GNAQ	0.771209	8.90971	3.11829	0.00209203	0.0128081258450063	-2.10944
WDR73	0.412052	8.23818	3.11803	0.00209379	0.0128101163340619	-2.11021
TGFBR2	-0.910185	7.39889	-3.11759	0.00209672	0.0128192330148434	-2.11149
EIF3J	0.60263	8.59072	3.11642	0.00210469	0.012854195613911	-2.11495
SNRPE	0.545981	9.67999	3.11619	0.00210623	0.012854195613911	-2.11562
NACA	0.406845	12.2344	3.11611	0.00210677	0.012854195613911	-2.11585
DND1	0.608045	8.20917	3.11503	0.00211415	0.0128903676555535	-2.11904
UFM1	0.539337	9.44343	3.11226	0.00213316	0.0129921727327092	-2.12722
PARP6	0.453034	9.38899	3.11201	0.00213487	0.0129921727327092	-2.12795
HSPA4	0.484063	8.23259	3.11196	0.00213522	0.0129921727327092	-2.1281
POLR2G	0.467936	11.1205	3.11106	0.0021414	0.0130208540520385	-2.13073
SNX5	0.661739	8.57147	3.11063	0.00214439	0.0130301826303246	-2.13201
RER1	-0.396339	8.47906	-3.11013	0.00214784	0.0130422576310084	-2.13348
PLOD3	-0.593984	8.09059	-3.10978	0.00215031	0.0130483253598102	-2.13452
RAD23B	-0.496538	8.71429	-3.10716	0.00216851	0.0131498004779395	-2.14221
PPCDC	-0.56886	6.86313	-3.10694	0.00217007	0.0131502150027286	-2.14287
C1orf35	0.43185	7.99316	3.10673	0.00217153	0.0131502150027286	-2.14348
LYST	-1.01788	6.88662	-3.10647	0.00217336	0.0131523863581724	-2.14425
BCOR	0.764749	7.92693	3.10392	0.00219126	0.0132517183310886	-2.15174
SUCLA2	0.834883	8.03645	3.10141	0.00220906	0.0133502864415794	-2.15912
WDR43	0.691894	7.69383	3.10024	0.00221739	0.0133915468060593	-2.16255
KDELR2	-0.59709	8.52399	-3.09878	0.00222779	0.0134336851669852	-2.16682
ERO1L	-0.65516	7.60766	-3.09864	0.00222879	0.0134336851669852	-2.16723
RSL1D1	0.643607	8.14203	3.09863	0.00222889	0.0134336851669852	-2.16727
GPX3	-0.79918	5.35205	-3.09831	0.00223119	0.013438437566772	-2.16821
TRAM1	0.556942	9.80203	3.09446	0.00225896	0.0135923891934297	-2.17949
TNIP2	-0.536116	8.56549	-3.09434	0.0022598	0.0135923891934297	-2.17983
WDR45B	-0.674944	9.94552	-3.09409	0.00226168	0.0135945296972216	-2.18059
SEMA4A	-0.912893	7.24484	-3.08788	0.00230718	0.0138586512574787	-2.19875
GOLGB1	0.496034	8.17417	3.08502	0.00232841	0.0139767128259695	-2.2071
COX11	0.629778	6.95537	3.08379	0.00233762	0.0140137448481879	-2.2107
PMS2P3	0.418152	8.55334	3.08371	0.00233825	0.0140137448481879	-2.21094
IKBKG	-0.411521	8.21089	-3.08357	0.00233929	0.0140137448481879	-2.21135
LMNB2	0.671165	8.53513	3.08293	0.00234408	0.0140329755292662	-2.21321
TGFBR1	-0.977615	5.72161	-3.08256	0.00234688	0.0140349538699927	-2.2143
STX4	-0.443488	8.23783	-3.08229	0.00234892	0.0140349538699927	-2.21509
CSGALNACT2	-0.798418	9.34395	-3.08204	0.00235079	0.0140349538699927	-2.21582
SP110	-0.588497	8.74374	-3.08201	0.00235102	0.0140349538699927	-2.21591
IKBKAP	0.47851	6.74126	3.08184	0.00235229	0.0140349538699927	-2.2164
PRRC1	0.819997	8.35983	3.08037	0.00236337	0.0140916136032197	-2.22068
MEX3C	0.740726	9.5986	3.07904	0.00237348	0.0141424569121761	-2.22457
CD1E	2.5143	5.12417	3.07847	0.00237777	0.01415855905524	-2.22622
DSTNP2	0.521333	7.09244	3.07729	0.00238679	0.0142027239775102	-2.22966
POLR1D	0.557421	10.6657	3.07659	0.00239217	0.0142252954940491	-2.23172
R3HDM1	0.397094	9.02597	3.07576	0.00239849	0.0142533047588974	-2.23412
KRBOX4	0.730088	7.97872	3.07507	0.00240383	0.0142755410176537	-2.23615
ZKSCAN1	0.7289	8.38824	3.07307	0.0024192	0.0143572818772906	-2.24196
IFT22	0.798329	6.36464	3.07231	0.00242509	0.0143826507999358	-2.24417
THUMPD2	0.750381	8.83277	3.07159	0.00243069	0.0144062309334008	-2.24627
LUC7L3	0.694751	10.7867	3.07099	0.00243532	0.0144241150989887	-2.24801
GTPBP8	0.449335	8.32036	3.06917	0.00244955	0.0144987185579662	-2.25331
MYBBP1A	0.402887	7.35989	3.06804	0.00245837	0.014541290710857	-2.25659
COPS8	0.339044	7.8668	3.06783	0.00246005	0.0145415320184153	-2.25721
H2AFZ	0.527217	12.6295	3.06756	0.00246217	0.0145444339391549	-2.25799
MTX1	-0.611999	9.22127	-3.06677	0.00246839	0.0145715140522991	-2.26029
CCT8	0.51121	8.5504	3.06583	0.00247576	0.0146053614016322	-2.26301
SMAD4	0.530221	7.21762	3.06327	0.00249605	0.0147152709322647	-2.27044
HSPA14	0.538269	8.88019	3.06099	0.00251429	0.0148130233363023	-2.27707
CUEDC2	0.602374	10.0942	3.05808	0.00253766	0.0149380551227826	-2.28549
CRTAP	-0.537053	7.80484	-3.05793	0.00253887	0.0149380551227826	-2.28592
PSMB2	0.340162	8.54077	3.05749	0.00254247	0.0149421780526945	-2.28722
PRDM1	-1.0671	6.5944	-3.05725	0.00254441	0.0149421780526945	-2.28791
CITED2	-0.912997	8.76141	-3.05723	0.0025446	0.0149421780526945	-2.28798
RPL9	0.158514	14.3898	3.05668	0.00254899	0.0149581268492835	-2.28955
ZFAND3	-0.607215	8.2124	-3.05386	0.00257198	0.0150830599394608	-2.29772
NAA60	-0.502787	8.57348	-3.05334	0.00257627	0.0150982752933554	-2.29924
METTL17	0.404057	9.15985	3.05313	0.00257796	0.0150982752933554	-2.29983
TAF1D	0.847518	8.3351	3.05273	0.00258125	0.015107602541821	-2.30099
DTL	1.1147	9.12436	3.05184	0.0025886	0.0151343939276922	-2.30358
MALT1	-0.810186	7.55991	-3.05175	0.00258933	0.0151343939276922	-2.30384
ATXN3	0.472898	6.50364	3.05137	0.00259245	0.0151343939276922	-2.30493
BRE	-0.495173	7.90366	-3.05135	0.00259262	0.0151343939276922	-2.305
KLHDC10	0.51924	7.43745	3.05096	0.00259579	0.0151429698229668	-2.30611
VANGL1	1.3649	6.01088	3.04977	0.00260569	0.015190789693307	-2.30957
BMS1	0.521966	8.76913	3.04892	0.00261267	0.0152215174779146	-2.31201
SIDT2	-0.593821	8.34911	-3.04759	0.00262375	0.0152760796565588	-2.31586
USP3	-0.68432	9.64067	-3.04648	0.00263304	0.0153201042073521	-2.31907
LIG4	1.3522	7.99384	3.04557	0.00264061	0.0153541707386815	-2.32169
PTK2B	-0.923165	8.26078	-3.04483	0.00264682	0.0153703132848685	-2.32382
PSMC5	0.510561	10.4129	3.04483	0.00264684	0.0153703132848685	-2.32383
HYI	0.601227	7.98633	3.04127	0.00267692	0.0155348508677793	-2.33411
PCNA	0.77048	11.6718	3.03917	0.00269478	0.0156283006060074	-2.34016
CCSER2	0.538307	7.20824	3.03547	0.00272658	0.0158024472646711	-2.35083
RNF123	-0.546358	7.57329	-3.03508	0.00272988	0.0158112845816513	-2.35193
FBXW4	0.40285	8.6576	3.0347	0.00273321	0.0158202940258374	-2.35304
CRISPLD2	-0.996216	6.46071	-3.0326	0.00275141	0.0159153052635936	-2.35907
PLAGL1	-1.16914	6.78419	-3.02926	0.00278063	0.016065104988465	-2.36867
UBE3A	0.400078	8.64514	3.02923	0.00278092	0.016065104988465	-2.36877
GALNT11	-1.13694	6.10927	-3.02729	0.00279801	0.0161534035589489	-2.37434
UBE2L3	0.442155	8.90344	3.02637	0.00280616	0.0161899713412469	-2.37699
CD47	0.52198	8.82071	3.0258	0.00281121	0.0162085773036599	-2.37862
FAM65A	-0.675747	8.17067	-3.02492	0.00281905	0.0162432628863785	-2.38115
NAA40	0.60569	7.70055	3.02385	0.00282853	0.0162873646064679	-2.3842
KMT2A	0.513704	7.89179	3.02218	0.00284347	0.0163628337802082	-2.38899
SECTM1	-1.32133	6.39943	-3.01923	0.00287007	0.0165052132016012	-2.39745
MELK	0.974383	8.5677	3.01522	0.00290658	0.016704399713653	-2.40894
MMP25	-1.01218	6.94221	-3.01337	0.00292355	0.0167911074980903	-2.41423
CDC23	0.472878	8.01742	3.01296	0.00292732	0.0168019223893157	-2.4154
PFDN5	-0.424851	11.9206	-3.01233	0.00293313	0.0168214900038282	-2.4172
ZSWIM8	-0.587374	8.358	-3.01218	0.00293451	0.0168214900038282	-2.41762
PRMT1	0.548096	9.95155	3.01154	0.00294048	0.0168448646948686	-2.41947
PTCRA	0.849171	7.35739	3.00793	0.00297404	0.017026186481825	-2.42978
LDLRAP1	-0.95466	6.74416	-3.00725	0.00298036	0.0170514340474095	-2.43171
FCER1A	-1.02036	5.8572	-3.0045	0.00300628	0.0171886501993103	-2.43957
TGIF1	-0.765578	8.15631	-3.00045	0.00304476	0.0173975371191549	-2.45112
XKR8	-0.40367	8.92904	-2.99946	0.00305424	0.0174404931108418	-2.45394
CHMP7	-0.661015	8.04304	-2.99924	0.00305626	0.0174408643770438	-2.45454
SNX2	-0.716827	8.9587	-2.99877	0.0030608	0.0174426549044808	-2.45588
ATP8B4	-1.98701	5.30418	-2.99863	0.00306214	0.0174426549044808	-2.45628
HMG20A	0.69172	8.16698	2.9986	0.00306245	0.0174426549044808	-2.45637
PSMD2	0.404518	9.9783	2.99736	0.00307438	0.0174937613189234	-2.45991
MLEC	0.478557	8.8372	2.99726	0.00307535	0.0174937613189234	-2.46019
THUMPD1	0.544499	9.49754	2.99636	0.00308401	0.0175318026234393	-2.46274
POTEKP	-0.827126	6.93129	-2.99555	0.00309185	0.0175651626084816	-2.46505
KIFAP3	0.58307	7.66108	2.99401	0.00310685	0.0176391744996627	-2.46944
DUSP5	-1.48553	7.7542	-2.99324	0.00311435	0.0176506101522025	-2.47163
DNPEP	0.490477	7.75664	2.99305	0.00311616	0.0176506101522025	-2.47216
SHOC2	-0.720619	10.0965	-2.99291	0.00311756	0.0176506101522025	-2.47256
COIL	0.423935	8.51529	2.99281	0.00311857	0.0176506101522025	-2.47286
CPSF6	0.444123	8.78188	2.99278	0.00311878	0.0176506101522025	-2.47292
HSP90AB1	0.948843	11.4547	2.99042	0.00314194	0.017770432977155	-2.47963
ANKRD40	0.355853	7.09442	2.98722	0.00317354	0.0179377802942884	-2.48871
EWSR1	0.44234	8.60008	2.97766	0.00326973	0.0184697260440079	-2.51579
KIAA1033	-0.903567	9.32805	-2.97653	0.00328128	0.0185232385375255	-2.51899
TSC22D1	0.854629	9.52252	2.97598	0.00328694	0.0185434486866832	-2.52056
ADAM19	-0.659785	6.95933	-2.9755	0.00329181	0.0185591373819942	-2.5219
SYNGR1	-0.857942	7.9097	-2.97345	0.00331298	0.0186667009460254	-2.52771
MPST	-0.620089	8.62962	-2.97271	0.00332066	0.0186981068602975	-2.52981
YPEL1	0.626602	8.35171	2.97107	0.00333759	0.0187815870784921	-2.53442
ALDOA	-0.54529	11.399	-2.96944	0.00335455	0.0188651383148506	-2.53901
MPHOSPH10	0.618458	8.58803	2.96849	0.00336457	0.0189090405390497	-2.54172
DNAJC9	0.568871	9.0214	2.96829	0.00336661	0.0189090405390497	-2.54227
RNASEH1	0.446757	8.65718	2.96764	0.0033734	0.0189352771741651	-2.54409
ANPEP	-1.22326	6.34231	-2.96692	0.00338103	0.0189629345914383	-2.54614
SLTM	0.580532	10.3204	2.96677	0.00338259	0.0189629345914383	-2.54656
NET1	0.927322	9.04429	2.96641	0.00338633	0.0189719497754137	-2.54756
TLR8	-1.42486	4.21716	-2.96323	0.00342001	0.0191485924857997	-2.55653
C11orf95	0.690871	7.95454	2.96195	0.00343362	0.0192127514899558	-2.56013
ACOT7	0.841742	7.39331	2.9615	0.00343845	0.019217733382464	-2.5614
GRPEL1	-0.544332	8.46926	-2.96147	0.00343883	0.019217733382464	-2.5615
ABHD17B	0.954746	8.46863	2.9605	0.00344918	0.019263493855238	-2.56422
RPS27A	0.211755	12.1859	2.95964	0.00345838	0.019294297386152	-2.56664
PRPF8	0.455715	10.51	2.95958	0.00345903	0.019294297386152	-2.56681
PIK3CG	-0.808091	7.44008	-2.95677	0.00348935	0.0194512763025224	-2.57471
SLC35B1	-0.455832	9.0657	-2.95576	0.00350033	0.0195002943598521	-2.57756
COPS3	0.491909	10.1296	2.95482	0.00351051	0.019544740703312	-2.58019
SYNJ1	-0.55538	6.1381	-2.95416	0.00351768	0.0195724261469122	-2.58204
STAMBP	0.357024	7.99758	2.95123	0.00354983	0.0197390347625904	-2.59028
KATNB1	0.555408	7.49941	2.94938	0.0035702	0.0198337027021322	-2.59546
PIGB	-0.540885	7.49775	-2.94928	0.00357131	0.0198337027021322	-2.59574
TIMM44	0.421576	7.58486	2.94785	0.00358713	0.0199091339782718	-2.59974
CTSK	-0.530352	6.94101	-2.94662	0.00360079	0.0199725074643558	-2.60318
PAFAH1B1	0.599038	8.36252	2.94584	0.00360959	0.0200088380003453	-2.60539
RHOF	-0.69586	7.71754	-2.94499	0.00361908	0.0200489969530085	-2.60777
RBM8A	0.467064	8.75728	2.94456	0.0036238	0.0200626766269347	-2.60895
SESN1	-1.23522	8.54257	-2.94155	0.00365768	0.020234231209394	-2.61737
RAB11A	0.462472	9.69707	2.94141	0.00365933	0.020234231209394	-2.61778
RPL35	0.217171	13.6133	2.9412	0.00366174	0.0202349837371454	-2.61838
FAM134A	-0.41489	9.02878	-2.94033	0.0036715	0.0202763318880857	-2.62079
RARA	-0.779832	6.66869	-2.94013	0.00367387	0.0202768302789194	-2.62137
STX6	0.468365	7.02742	2.93949	0.00368111	0.0203042145236978	-2.62315
IGLL5	-1.36712	7.0656	-2.9382	0.00369574	0.0203678888916631	-2.62674
CD86	-1.25382	6.07194	-2.93807	0.00369723	0.0203678888916631	-2.62711
PNP	-0.943607	9.1619	-2.93602	0.00372074	0.0204847738725525	-2.63284
SERPINB9	-0.872017	7.60677	-2.93496	0.00373299	0.0205395428487447	-2.63582
PARD3	1.16614	7.82407	2.93356	0.00374909	0.0206153646376392	-2.63971
FBXO21	0.497306	8.68071	2.93188	0.00376863	0.020710007433771	-2.64441
DENND4C	0.736827	7.46672	2.93046	0.00378509	0.0207876359029843	-2.64836
FAM129A	-1.16504	7.83247	-2.9283	0.00381039	0.0209137226337709	-2.65438
HINT1	0.436608	11.9262	2.92801	0.00381383	0.0209197181931257	-2.6552
CDKN2AIP	0.679289	8.94881	2.92766	0.00381787	0.0209258165348082	-2.65616
ARL6IP5	-0.609568	10.1904	-2.92751	0.00381964	0.0209258165348082	-2.65658
RHAG	-1.3029	5.64523	-2.92702	0.00382545	0.0209447416501374	-2.65795
LRP12	1.90291	4.96061	2.92534	0.00384528	0.021040379542088	-2.66263
CIAO1	0.361889	7.71462	2.9246	0.00385403	0.0210753408324013	-2.66468
TOMM20	0.43547	11.162	2.92398	0.00386134	0.0211023556620435	-2.6664
MS4A1	-1.72021	7.43919	-2.91923	0.00391816	0.0213997195949334	-2.6796
ARHGEF7	0.713062	8.27775	2.91819	0.00393076	0.0214554011097052	-2.68251
ANKRD36	0.90878	7.12612	2.91703	0.00394478	0.0215187325256794	-2.68572
SSFA2	0.752391	8.19321	2.91634	0.00395317	0.0215498110399597	-2.68764
FUBP1	0.53145	9.36346	2.91616	0.00395531	0.0215498110399597	-2.68814
MS4A6A	-1.59249	7.22523	-2.91552	0.00396306	0.0215788242060736	-2.6899
GATA1	-0.835836	6.09378	-2.91463	0.00397389	0.0216245431224223	-2.69237
CMAHP	1.05836	6.5364	2.91386	0.00398333	0.0216626742509507	-2.69451
MSL1	-0.496304	10.0862	-2.91242	0.00400098	0.0217364627815138	-2.69851
C17orf75	0.580547	6.94177	2.91236	0.00400177	0.0217364627815138	-2.69869
ATP5SL	0.421559	8.75947	2.91179	0.00400876	0.0217611584433073	-2.70027
HAUS6	0.812781	6.95464	2.9106	0.00402338	0.0218271962852925	-2.70356
SALL2	1.18235	7.52597	2.91019	0.00402842	0.0218412544438884	-2.70469
TUFM	0.468301	9.8291	2.90569	0.00408441	0.0221312301816939	-2.71716
NUP205	0.436693	7.56012	2.90549	0.00408687	0.0221312301816939	-2.7177
ZNF124	0.577549	7.43751	2.90526	0.00408975	0.0221333685705303	-2.71834
MPP1	-0.88306	10.3194	-2.90416	0.00410349	0.0221942058005567	-2.72137
GPR137B	-1.00366	5.57222	-2.90284	0.00412012	0.0222689465529635	-2.72502
NDUFB11	0.482491	10.8924	2.90267	0.0041223	0.0222689465529635	-2.7255
MTMR11	-1.15881	5.53507	-2.90213	0.00412915	0.0222924084989474	-2.727
CTBP2	-0.768596	8.37409	-2.90063	0.00414813	0.0223812943152948	-2.73114
PFKP	0.978315	8.7615	2.90016	0.00415401	0.0223994567831273	-2.73242
SCRN1	-1.22459	5.76598	-2.89955	0.00416184	0.0224281034295084	-2.73412
HNRNPR	0.494275	10.5777	2.89919	0.00416644	0.0224393254866662	-2.73512
BAG4	-0.663708	6.93042	-2.89721	0.00419169	0.0225616655427728	-2.74058
NABP2	0.614956	7.33316	2.8969	0.00419561	0.0225691535683673	-2.74142
CNOT2	0.522145	9.37242	2.896	0.00420722	0.0226179123299463	-2.74391
SLC25A12	0.404763	7.0052	2.89532	0.00421596	0.0226512430688372	-2.74579
GLIPR1	-0.968206	7.93642	-2.89418	0.00423059	0.02271617500489	-2.74892
TSEN34	-0.559571	9.0351	-2.89286	0.00424777	0.0227946797182905	-2.75258
IGLJ3	-0.839651	7.22827	-2.89178	0.00426178	0.0228560681861113	-2.75555
CEP97	0.611098	6.21289	2.89068	0.00427605	0.0229188124025278	-2.75857
SDF4	-0.463199	8.69857	-2.89044	0.00427919	0.022921848333563	-2.75923
SLC2A5	-0.999775	7.65051	-2.88988	0.00428647	0.0229470246918528	-2.76076
GMEB2	-0.485824	8.72979	-2.88927	0.00429455	0.0229764878107153	-2.76246
CKS2	0.871581	10.8647	2.8882	0.00430857	0.0230376390339509	-2.7654
ZNHIT6	0.565271	7.93327	2.88536	0.00434602	0.0232239867658559	-2.77322
ZNF529	0.991264	7.72637	2.88512	0.00434917	0.0232268833162641	-2.77387
ACP1	0.425401	9.35197	2.88479	0.0043536	0.0232365912480924	-2.77479
OGFOD1	0.490463	7.44824	2.88426	0.00436055	0.0232597329667495	-2.77623
DENND1A	-0.826258	6.33434	-2.88128	0.00440034	0.023456827868693	-2.78442
PTBP2	0.835869	8.61219	2.8811	0.00440276	0.023456827868693	-2.78492
CTSE	-0.80849	5.93618	-2.88068	0.00440833	0.023471228821236	-2.78606
TNS1	-1.20775	6.40772	-2.8805	0.00441074	0.023471228821236	-2.78655
ZNF146	0.822745	9.24666	2.8803	0.0044134	0.0234714026715209	-2.7871
LRRC40	0.500347	8.46109	2.87955	0.00442346	0.0235108488782928	-2.78915
CLSTN1	0.610495	9.17013	2.87559	0.00447704	0.0237814535206338	-2.80001
IMPA1	0.644116	9.71054	2.8723	0.00452206	0.0240060123985931	-2.80903
RAB3D	-0.682832	6.36432	-2.87211	0.00452471	0.0240060123985931	-2.80956
FXYD2	1.56468	6.37826	2.87009	0.0045525	0.0241390999234607	-2.81508
ABHD4	-0.546498	7.18083	-2.8681	0.00458	0.0242704530387183	-2.82051
KRR1	0.489555	8.28152	2.86317	0.00464899	0.0246214236207527	-2.83399
PCM1	0.6027	8.2909	2.8618	0.00466821	0.0247085169578698	-2.83771
ZNF331	-0.919501	8.6322	-2.85972	0.00469768	0.0248497300941798	-2.84338
NARS	0.51532	10.7372	2.85914	0.004706	0.0248789739602974	-2.84498
SHFM1	0.581709	9.76259	2.85687	0.00473845	0.0250356479433314	-2.85117
SEC23B	-0.484755	7.9826	-2.8563	0.00474657	0.0250636951997309	-2.85271
ID1	1.94761	7.03505	2.8543	0.00477534	0.0252006551101947	-2.85815
MAPKAPK2	-0.79054	8.20571	-2.85398	0.0047799	0.0252097994572734	-2.85901
SQLE	0.744502	7.58427	2.85344	0.0047877	0.0252360205303716	-2.86048
SERTAD3	-0.742168	7.43456	-2.85106	0.00482225	0.0254030484348355	-2.86696
DAPP1	-0.681344	8.01381	-2.85082	0.00482578	0.0254066586845504	-2.86762
PLOD1	-0.763847	6.69024	-2.84998	0.00483806	0.0254479989216188	-2.86991
ARMCX5	0.720306	7.69189	2.84977	0.00484105	0.0254479989216188	-2.87046
RBX1	-0.554683	10.8011	-2.84969	0.0048422	0.0254479989216188	-2.87068
ERCC3	0.439151	8.15126	2.84884	0.00485469	0.0254868224217058	-2.873
UBA2	0.373774	10.2338	2.84862	0.00485789	0.0254868224217058	-2.87359
ACAA1	-0.409887	8.89859	-2.8486	0.00485818	0.0254868224217058	-2.87364
GTPBP6	0.505299	8.52139	2.84341	0.00493476	0.025863549768484	-2.88773
ITGA2B	-1.07051	4.87325	-2.84334	0.00493579	0.025863549768484	-2.88792
SPTBN1	0.75188	8.16902	2.84307	0.0049398	0.0258693313068022	-2.88865
SLC25A46	0.636075	9.03495	2.84282	0.00494365	0.0258727967827262	-2.88935
SDPR	-1.36343	4.56631	-2.84264	0.00494627	0.0258727967827262	-2.88983
ACTL6A	0.786269	8.37692	2.8419	0.00495725	0.0259149961763417	-2.89182
C6orf48	0.547108	12.0245	2.83654	0.00503791	0.0263212519653982	-2.90635
ABCA1	-0.952416	7.42371	-2.83632	0.00504122	0.0263230941619985	-2.90694
REXO4	0.430998	8.00919	2.83599	0.0050462	0.0263336827656009	-2.90783
CD2AP	0.78507	8.50571	2.83542	0.00505493	0.0263637826504007	-2.90939
FAM206A	0.464783	7.92976	2.83406	0.00507564	0.0264330869779189	-2.91306
TGDS	0.549793	7.48792	2.83399	0.00507671	0.0264330869779189	-2.91325
CPOX	-0.963946	7.4787	-2.83378	0.00507984	0.0264330869779189	-2.91381
TLN1	-0.861615	6.9272	-2.83377	0.00508009	0.0264330869779189	-2.91385
NR3C1	0.74984	10.3064	2.8322	0.00510404	0.0265331761158437	-2.91808
SLC4A1	-1.74218	7.733	-2.83212	0.00510528	0.0265331761158437	-2.9183
DUT	0.532332	11.0275	2.8314	0.00511636	0.0265538356878934	-2.92025
RNASET2	-0.693608	10.0923	-2.83132	0.00511756	0.0265538356878934	-2.92046
FAM105A	-0.842545	5.46181	-2.83114	0.00512032	0.0265538356878934	-2.92095
GALNT10	-0.718064	6.48361	-2.83098	0.00512271	0.0265538356878934	-2.92137
NR2C1	0.495314	6.90992	2.83089	0.00512416	0.0265538356878934	-2.92163
CHD1L	0.506609	8.41026	2.83008	0.00513657	0.0266026303222456	-2.9238
PSMD1	0.387804	9.07679	2.82749	0.00517675	0.0267951590535139	-2.93081
PFN1	-0.831166	12.2235	-2.82699	0.00518446	0.0268194664029517	-2.93215
NFKB2	-0.880181	6.20288	-2.82627	0.0051957	0.0268248556705703	-2.9341
ZNF232	0.834014	7.1031	2.82617	0.00519718	0.0268248556705703	-2.93435
ATP5J	0.47959	11.5862	2.82615	0.00519746	0.0268248556705703	-2.9344
KLHDC2	0.446845	10.3024	2.82615	0.00519754	0.0268248556705703	-2.93442
RPP40	0.690082	8.2075	2.82588	0.00520167	0.0268305944632041	-2.93513
QSOX1	-0.857927	7.20922	-2.82507	0.00521439	0.0268741283150626	-2.93733
OAZ2	-0.528251	8.72681	-2.82496	0.00521614	0.0268741283150626	-2.93763
CHEK1	0.671201	7.42086	2.82458	0.00522204	0.0268890003629021	-2.93865
NAB1	0.512502	6.80683	2.82216	0.00526011	0.0270693599428133	-2.94518
FNBP1	0.740248	9.6541	2.82027	0.00528995	0.0272071985470273	-2.95026
FAM49A	-0.938761	7.20234	-2.81984	0.00529668	0.0272261006114526	-2.95141
MAN2B2	-0.452035	8.07423	-2.81926	0.00530598	0.0272581636940176	-2.95298
MRPL11	0.444363	9.04953	2.81687	0.00534402	0.0274377733450455	-2.95941
ULK1	-0.560172	7.93274	-2.81327	0.00540178	0.0277183629831566	-2.96907
GOT1	0.471213	7.4434	2.81176	0.00542626	0.0278279157289156	-2.97313
DENR	0.404244	9.59054	2.81028	0.00545034	0.0279353338242965	-2.97711
PMAIP1	1.13491	11.3551	2.8091	0.00546954	0.0280176040475108	-2.98027
SNRPD3	0.47223	11.1605	2.80828	0.0054829	0.0280699390559831	-2.98246
LSM5	0.55386	8.32299	2.80478	0.00554041	0.0283480553337603	-2.99184
CAPN2	-0.871041	7.33611	-2.80254	0.00557757	0.0285217976007893	-2.99784
GTF3C5	0.673628	7.38668	2.80006	0.00561887	0.0287165216930328	-3.00447
FCGR2C	-1.10049	6.56512	-2.79891	0.00563815	0.0287985186530844	-3.00754
C8orf33	0.511975	8.55671	2.79623	0.00568321	0.0290120665015662	-3.01469
LMO2	-1.11613	9.13491	-2.79543	0.00569675	0.0290645149085322	-3.01683
GYPC	-1.03316	10.2572	-2.79396	0.00572182	0.0291756939587455	-3.02077
GPR56	1.76171	9.32784	2.79099	0.00577244	0.0294169733858017	-3.02868
ARIH2	0.415386	7.67705	2.79039	0.00578282	0.0294401425929027	-3.03029
MRPL22	0.504461	9.10475	2.79034	0.00578359	0.0294401425929027	-3.03041
GTF3C4	0.528555	7.33029	2.78951	0.00579786	0.0294959303110298	-3.03262
ATXN2	0.537608	7.69171	2.78732	0.00583563	0.0296711302124098	-3.03845
RAB5B	-0.814215	8.31247	-2.78633	0.00585295	0.0297303297058502	-3.04111
CLN3	-0.415987	7.89583	-2.78627	0.00585395	0.0297303297058502	-3.04126
GSS	0.47745	8.52457	2.78554	0.00586664	0.0297716787649929	-3.04321
NDUFS3	0.410643	10.4639	2.78541	0.00586878	0.0297716787649929	-3.04353
COPS5	0.471478	9.96914	2.78361	0.00590025	0.029914317206726	-3.04833
SPATA20	-0.834684	7.2799	-2.78046	0.00595561	0.0301777925691022	-3.05671
POT1	0.526687	7.56746	2.7798	0.00596729	0.0302197770754172	-3.05847
GUSBP11	-0.46479	8.248	-2.77856	0.00598924	0.0303137175875747	-3.06176
TEFM	0.56752	7.61802	2.77815	0.00599647	0.0303330652028628	-3.06284
RRAS2	1.20682	7.31082	2.77743	0.00600928	0.0303785608321078	-3.06476
TTK	1.03196	7.8446	2.77723	0.00601277	0.0303785608321078	-3.06528
NUFIP1	0.421875	7.28532	2.77707	0.00601569	0.0303785608321078	-3.06571
CD48	-0.93899	9.33591	-2.77669	0.00602246	0.0303955180223365	-3.06672
LGALSL	-1.40362	4.83416	-2.77483	0.00605569	0.0305459076585427	-3.07166
USPL1	0.596209	8.3101	2.77394	0.00607167	0.0306091653934571	-3.07402
PAICS	0.725293	9.03906	2.77272	0.00609345	0.0306890106844422	-3.07723
ITPR2	0.70552	6.52558	2.77267	0.00609439	0.0306890106844422	-3.07737
CLK2	0.417352	9.1691	2.77188	0.00610869	0.0307436401041743	-3.07947
FIG4	-0.583848	8.22857	-2.7704	0.0061355	0.0308611019054081	-3.08339
SPATS2	0.443229	6.8941	2.76983	0.00614571	0.0308950257387882	-3.08489
TPST2	-0.7208	8.91622	-2.76876	0.00616528	0.030975916520295	-3.08774
FAM179B	0.661941	7.25228	2.76749	0.00618839	0.0310745060211406	-3.09109
ASS1	0.999802	6.70399	2.76721	0.00619345	0.0310823931155189	-3.09182
PHACTR4	0.562823	7.87299	2.76601	0.00621553	0.0311756151169934	-3.09501
KIAA0196	-0.428055	8.16418	-2.76498	0.00623433	0.0312523279170421	-3.09772
CA1	-1.07922	6.63151	-2.76359	0.00625995	0.0313631215547073	-3.10139
C11orf57	0.46028	7.75395	2.76129	0.0063026	0.0315590402614537	-3.10748
METTL18	0.657886	7.15275	2.76001	0.00632629	0.0316598625789324	-3.11084
LETMD1	0.388946	9.36003	2.75942	0.00633741	0.0316965666090536	-3.11241
INPP5K	-0.432724	8.03503	-2.75924	0.00634074	0.0316965666090536	-3.11288
LYL1	-0.813323	9.43272	-2.75903	0.00634463	0.0316982296529647	-3.11343
PPP1R14B	0.645227	9.74815	2.75807	0.0063625	0.0317697151887337	-3.11595
UBXN7	0.535691	8.63134	2.75625	0.0063968	0.0319230639667613	-3.12077
PCNXL2	0.771648	6.68989	2.75598	0.00640181	0.0319302106351847	-3.12147
BRIX1	0.574916	7.27345	2.75529	0.00641483	0.0319772076588483	-3.12329
TXNIP	-0.893165	11.8959	-2.75439	0.00643177	0.0320437465179372	-3.12565
DPY19L4	0.577083	6.77069	2.75403	0.00643859	0.0320597845663758	-3.1266
ZNF185	-1.05229	7.22849	-2.75256	0.00646657	0.0321811163018989	-3.13048
ZBTB43	-0.698371	7.63856	-2.75111	0.0064941	0.0323000632415422	-3.13429
PSMA3	0.448903	9.56255	2.74978	0.00651959	0.0323924700546789	-3.1378
TLE3	-0.895556	7.35561	-2.74976	0.00651995	0.0323924700546789	-3.13784
CD33	-1.55382	6.08997	-2.74881	0.00653806	0.0324643509466889	-3.14033
SNX10	-1.19437	7.68861	-2.7473	0.00656719	0.032590820435983	-3.14431
HLA-DRB6	-0.975571	7.99888	-2.74687	0.00657546	0.0326137000747339	-3.14544
TAF5L	0.440408	8.00642	2.74661	0.0065805	0.0326205422308834	-3.14612
SH2B3	-0.944756	8.94383	-2.74523	0.00660716	0.0327344895607571	-3.14974
ZC4H2	0.534175	7.98803	2.74424	0.00662634	0.032793306338326	-3.15233
IMMT	0.409196	9.46524	2.74424	0.0066264	0.032793306338326	-3.15234
HMGN5	0.640347	6.08868	2.74217	0.0066668	0.0329749342291096	-3.15778
GBAP1	-0.655605	7.8363	-2.74121	0.00668549	0.033049019069549	-3.16029
PSAP	-0.882642	11.0522	-2.74096	0.00669042	0.0330550385206825	-3.16095
SUPT7L	0.378461	7.59236	2.74044	0.00670059	0.0330667289791661	-3.16231
ETHE1	-0.575944	9.18884	-2.7404	0.00670145	0.0330667289791661	-3.16242
TRNAU1AP	0.374806	7.31984	2.74013	0.00670667	0.0330667289791661	-3.16312
PNOC	-0.929092	5.66616	-2.74008	0.00670763	0.0330667289791661	-3.16325
ADRBK2	0.667422	7.06372	2.73937	0.00672169	0.033117689121508	-3.16512
FXR1	0.423816	9.07103	2.73899	0.00672919	0.0331248645197526	-3.16612
SKP1	0.325213	10.8926	2.73892	0.00673058	0.0331248645197526	-3.1663
EIF4E2	-0.333786	7.82881	-2.73764	0.00675567	0.033230000740401	-3.16963
NCAPD3	0.537319	8.43013	2.73619	0.00678439	0.0333528527400615	-3.17343
TSC1	0.44436	8.34289	2.73585	0.0067912	0.0333678973735881	-3.17433
MNS1	0.978617	6.32388	2.7338	0.00683212	0.0335500618005014	-3.1797
PDXK	-0.838827	7.42796	-2.73361	0.00683581	0.0335500618005014	-3.18018
SEC61B	0.474219	10.7241	2.7325	0.00685804	0.0336406269930164	-3.18309
ZBTB7A	-0.421876	6.10162	-2.72829	0.00694288	0.0340328386840905	-3.19408
LGALS1	-1.95552	8.96563	-2.72816	0.00694563	0.0340328386840905	-3.19444
KCNH2	-0.980074	6.39858	-2.72778	0.00695325	0.0340514276638448	-3.19542
METTL7A	-0.631551	6.8777	-2.72727	0.00696369	0.0340838410294465	-3.19676
PGAP1	1.14651	5.65728	2.72481	0.0070138	0.0343102162167145	-3.20317
MEN1	0.524833	8.80652	2.72407	0.00702893	0.0343653464582434	-3.20509
ATP5G3	0.34782	11.1148	2.72387	0.00703296	0.034366215600269	-3.20561
ADSS	-0.536492	8.26203	-2.72353	0.00704009	0.034382210386719	-3.20651
SNAP23	-0.572418	7.49044	-2.72309	0.00704897	0.0344067142884444	-3.20764
TMEM251	0.711634	7.83603	2.72261	0.00705889	0.0344362685922829	-3.2089
FANCL	0.816601	8.1062	2.72213	0.00706886	0.0344660119223156	-3.21016
TM7SF3	0.724589	7.70472	2.72161	0.00707949	0.0344967951756223	-3.2115
ATP6V0E1	-0.51861	8.13841	-2.72145	0.00708292	0.0344967951756223	-3.21193
NSDHL	0.465323	6.7864	2.72002	0.00711238	0.0346124005237219	-3.21564
THYN1	0.626715	8.94399	2.71992	0.00711443	0.0346124005237219	-3.2159
TAF7	0.470737	11.3577	2.71756	0.00716347	0.034832006977831	-3.22204
RELA	-0.52306	8.61244	-2.71682	0.00717898	0.0348883681323482	-3.22397
ZNF267	-0.767275	7.53897	-2.71628	0.00719015	0.0349235708887243	-3.22536
PSMA2	0.357179	9.90208	2.71568	0.00720289	0.0349522189787681	-3.22694
TPGS2	0.445993	8.2085	2.71563	0.00720389	0.0349522189787681	-3.22707
IGKC	-0.831002	7.2285	-2.71105	0.00730045	0.0354014135967745	-3.23896
SEC61A2	0.568784	6.94908	2.71027	0.00731706	0.0354626623659014	-3.24099
IFT52	0.333249	8.3306	2.70986	0.00732566	0.03548502868256	-3.24204
GNG7	-0.898948	8.17753	-2.709	0.00734405	0.0355547737534278	-3.24428
PAF1	0.476432	8.16873	2.70839	0.00735707	0.0355984696770613	-3.24586
NDEL1	-0.452931	8.57995	-2.70711	0.00738433	0.0357109742928752	-3.24917
AEBP1	1.11758	9.26734	2.70678	0.00739138	0.035718981181317	-3.25002
CDC42SE1	-0.51267	9.67651	-2.70666	0.00739401	0.035718981181317	-3.25033
PRPS1	0.58072	9.2255	2.70573	0.00741414	0.0357968128334013	-3.25276
HSPB1	1.15467	9.76233	2.70424	0.00744606	0.0358993951304442	-3.2566
DNAJA1	0.576204	11.0681	2.70418	0.00744746	0.0358993951304442	-3.25677
VKORC1	-0.52076	8.90511	-2.70418	0.00744747	0.0358993951304442	-3.25677
2025-03-08	-0.541981	8.34173	-2.70193	0.00749609	0.0361142245384708	-3.26258
SNRPC	0.408613	10.4438	2.70029	0.00753197	0.0362674476132428	-3.26684
LAT2	-0.744493	8.6252	-2.69937	0.00755195	0.036334655217363	-3.2692
OGFR	-0.508938	7.1276	-2.69927	0.00755408	0.036334655217363	-3.26946
SSBP3	0.615658	7.29875	2.69861	0.00756863	0.0363849982219828	-3.27117
GPN2	0.425623	7.44761	2.69653	0.00761427	0.0365846154089612	-3.27654
RPS5	0.238302	13.695	2.69499	0.00764833	0.0367157662444502	-3.28052
ARFGAP3	0.58532	9.75802	2.69492	0.0076498	0.0367157662444502	-3.28069
ICAM4	-0.696087	5.96905	-2.6941	0.00766798	0.0367831903525404	-3.28281
GRAMD4	0.778533	8.62821	2.69367	0.00767761	0.0367969784548204	-3.28393
MDH2	0.423341	9.23991	2.6936	0.00767912	0.0367969784548204	-3.28411
DNAJB4	0.66216	6.52588	2.69265	0.00770018	0.0368780813248946	-3.28655
PPP2R5A	-0.480288	8.54899	-2.69194	0.00771606	0.0369342730997563	-3.28839
KATNA1	0.511393	8.14704	2.69122	0.00773215	0.0369914140878165	-3.29025
ACACA	0.512013	7.81651	2.69086	0.00774008	0.0370094833895781	-3.29116
STIP1	0.742851	8.19967	2.69041	0.0077503	0.0370384654373013	-3.29234
LPAR2	-0.663315	7.78539	-2.6897	0.00776605	0.0370938280134964	-3.29415
REPS1	0.681071	6.49414	2.68783	0.00780812	0.0372747719370765	-3.29897
STX18	0.370384	8.49766	2.6868	0.00783134	0.0373655984472604	-3.30162
RUNX1-IT1	0.806087	8.69141	2.68633	0.00784195	0.0373961819934942	-3.30282
ZNF45	0.487855	6.83674	2.68386	0.00789823	0.0376444229358079	-3.3092
BCL11B	1.23585	8.16309	2.6835	0.00790631	0.0376627668285488	-3.31011
HNRNPD	0.28769	10.1443	2.68273	0.00792396	0.0377267131232973	-3.3121
LOC399491	0.476294	10.5584	2.67839	0.00802367	0.038181021271314	-3.32325
UFSP2	0.450205	7.62358	2.67754	0.00804334	0.0382541784665878	-3.32543
CHD3	0.477279	8.38626	2.67722	0.0080506	0.0382682519923757	-3.32623
CYP1B1	-1.1531	4.99725	-2.67618	0.00807476	0.0383626502253182	-3.3289
RNF167	-0.4751	8.78682	-2.67421	0.00812071	0.0385225361323041	-3.33396
GMDS	0.575723	6.98982	2.67413	0.00812255	0.0385225361323041	-3.33416
C1orf27	0.573998	7.41357	2.67406	0.00812423	0.0385225361323041	-3.33435
UQCRQ	0.450843	11.3388	2.67399	0.00812571	0.0385225361323041	-3.33451
E2F6	0.592216	7.41588	2.67332	0.00814146	0.0385766570069365	-3.33623
PF4V1	-1.76266	3.86763	-2.67243	0.00816229	0.0386548016528254	-3.33851
TSPAN13	-1.0267	10.0268	-2.67124	0.00819022	0.0387638289506746	-3.34156
SERBP1	0.403288	10.2342	2.67108	0.00819402	0.0387638289506746	-3.34197
RAB11FIP3	0.498819	7.47043	2.66977	0.00822488	0.0388891679389347	-3.34532
IL1R1	-1.01577	4.64304	-2.6693	0.00823602	0.0389211811612853	-3.34652
MAP1A	0.723805	7.02607	2.66865	0.00825143	0.0389719282600734	-3.34819
TMEM30A	-0.647211	8.65619	-2.66848	0.0082555	0.0389719282600734	-3.34863
SUMO1	0.392446	9.78599	2.66658	0.00830049	0.0391635267389638	-3.35347
MRPL4	0.502501	7.84726	2.66604	0.00831335	0.039203461565901	-3.35485
POLR1C	0.4509	7.59593	2.66087	0.00843748	0.0397677469799815	-3.36804
PI4K2A	-0.616029	6.62469	-2.66021	0.00845349	0.0398022559135153	-3.36973
TRIP6	0.705844	8.25625	2.66008	0.0084568	0.0398022559135153	-3.37008
ZNF26	0.491341	7.67901	2.65989	0.00846129	0.0398022559135153	-3.37055
PLA2G6	0.425875	7.44155	2.65983	0.00846267	0.0398022559135153	-3.3707
ZNF394	-0.702784	8.71876	-2.65886	0.00848618	0.0398917758746359	-3.37317
RTF1	0.345127	8.72294	2.65832	0.00849936	0.0399326245731169	-3.37455
NCSTN	-0.436157	7.53957	-2.65609	0.00855394	0.0401679124027162	-3.38025
ARL1	0.343149	7.53189	2.65575	0.00856207	0.0401848816689086	-3.38109
FOXO1	-0.963649	8.08332	-2.65444	0.00859435	0.0403075403677029	-3.38444
SMG8	0.508735	8.15274	2.65432	0.00859725	0.0403075403677029	-3.38474
ELAVL1	0.395123	8.98174	2.6533	0.00862231	0.0403869543002998	-3.38733
CENPU	0.860928	9.60957	2.65326	0.00862326	0.0403869543002998	-3.38743
PAXIP1	0.548086	8.45187	2.65286	0.00863323	0.0404123916027825	-3.38846
FHL3	-0.631825	6.85786	-2.6494	0.0087189	0.0407919748607187	-3.39724
THAP4	0.452374	8.57418	2.64792	0.00875589	0.0409435746311793	-3.40101
RSRC2	0.551825	10.7195	2.64634	0.00879552	0.041107280416186	-3.40503
DDX18	0.386195	8.88359	2.64472	0.00883608	0.0412751716419188	-3.40912
BMX	-1.36009	4.7289	-2.6437	0.008862	0.0413723536809633	-3.41172
CEACAM21	-1.1266	6.3174	-2.64353	0.00886617	0.0413723536809633	-3.41214
CDK17	0.552214	8.16583	2.64311	0.00887695	0.0414009552267157	-3.41322
GZMB	-1.33006	7.44633	-2.64244	0.00889372	0.041449045195082	-3.4149
SMNDC1	0.470071	10.4106	2.64233	0.00889656	0.041449045195082	-3.41519
ITGA4	0.878769	9.04325	2.6399	0.00895832	0.0417149514599975	-3.42134
FAM127A	-0.950376	7.93822	-2.6395	0.00896864	0.0417412004690312	-3.42236
SRP72	0.386833	8.78147	2.63878	0.00898687	0.0417984897531063	-3.42416
YLPM1	0.311106	8.61437	2.63865	0.00899034	0.0417984897531063	-3.42451
LIPA	-0.625259	9.7959	-2.63803	0.00900615	0.0418501695727197	-3.42607
PBK	1.31282	7.13394	2.63739	0.00902261	0.0418985557753395	-3.42769
SMAD3	-0.757647	6.85699	-2.63726	0.00902597	0.0418985557753395	-3.42802
EIF3E	0.372203	11.787	2.63596	0.00905931	0.0420314402356731	-3.4313
RTFDC1	-0.428212	8.95597	-2.63519	0.00907922	0.0421018568216937	-3.43325
ZNF318	-0.628231	7.17513	-2.63405	0.00910875	0.0422168163365364	-3.43614
VIM	-0.619767	12.0726	-2.63233	0.0091535	0.0423918553069671	-3.44049
SLC25A17	0.366952	7.26984	2.63223	0.00915603	0.0423918553069671	-3.44074
PHF14	0.654234	5.71383	2.63163	0.00917165	0.0424297991570865	-3.44225
EMR1	-1.07014	6.07423	-2.63145	0.00917632	0.0424297991570865	-3.44271
LSM2	0.624627	9.41063	2.63122	0.00918227	0.0424297991570865	-3.44328
ORC4	0.390896	7.68398	2.63118	0.00918328	0.0424297991570865	-3.44338
MOSPD3	-0.424359	7.38554	-2.63039	0.00920403	0.0425036316260535	-3.44539
PTP4A2	0.391684	11.7434	2.62939	0.00923013	0.0426020767590914	-3.4479
HSPD1	0.585849	10.4842	2.62817	0.00926218	0.0427278765189447	-3.45098
LXN	-0.835104	7.68165	-2.6277	0.0092745	0.0427625701064507	-3.45216
DYNLL1	0.842897	11.2863	2.62584	0.00932346	0.0429660406400342	-3.45684
FUT8	0.656251	7.44222	2.62441	0.0093615	0.0431190650244201	-3.46045
KLHL36	-0.48243	7.03383	-2.62318	0.00939406	0.0432466569702308	-3.46354
HADHB	-0.332381	10.3027	-2.62244	0.00941377	0.0433150340596889	-3.4654
CUTA	0.502083	11.0247	2.62185	0.00942963	0.0433655888957143	-3.46689
EI24	0.42138	8.73376	2.62005	0.00947773	0.0435643255754107	-3.47141
NDUFS6	0.480834	10.7533	2.61846	0.00952045	0.0437380723296828	-3.4754
RBBP4	0.636123	9.97651	2.61472	0.00962172	0.0441805530151249	-3.4848
MCM6	0.614978	9.84984	2.6142	0.00963589	0.044222825875521	-3.4861
MCM7	0.623288	10.2148	2.61171	0.00970389	0.0444857450800393	-3.49234
INPP5A	-0.545733	7.53513	-2.61154	0.00970856	0.0444857450800393	-3.49277
TFR2	-0.576777	6.25615	-2.61141	0.00971213	0.0444857450800393	-3.4931
CNIH1	0.404555	10.2657	2.61138	0.00971315	0.0444857450800393	-3.49319
PEX13	0.432466	6.11935	2.60848	0.00979298	0.0448283024261381	-3.50045
PIK3IP1	-0.923034	8.34804	-2.60775	0.009813	0.0448968728832518	-3.50226
MTA1	0.560465	7.90649	2.60749	0.00982024	0.0449069261698228	-3.50292
PIK3R3	1.1009	6.61741	2.60589	0.00986463	0.0450845938506461	-3.50692
CYB5R4	-0.593139	7.64887	-2.60573	0.00986921	0.0450845938506461	-3.50733
MRPS11	0.328609	7.29457	2.60438	0.00990668	0.0452325586258618	-3.51069
DSTN	0.878529	8.9092	2.60336	0.00993521	0.0453395797300799	-3.51324
C5orf30	-0.77515	6.72255	-2.60243	0.00996152	0.0454363484234406	-3.51559
CLEC4E	-1.19097	6.23438	-2.60186	0.00997755	0.0454709995580739	-3.51701
PRPF19	0.498153	9.70855	2.60179	0.00997932	0.0454709995580739	-3.51717
COL17A1	-1.42518	4.81087	-2.6015	0.00998745	0.0454847589286928	-3.51789
NFKBIA	-0.645638	10.8694	-2.60089	0.0100048	0.0455322252177136	-3.51943
ANKRD28	0.820657	8.66857	2.60077	0.0100081	0.0455322252177136	-3.51972
C1orf50	0.447964	7.61	2.60058	0.0100134	0.0455331233779718	-3.52019
ATP8A1	-0.646719	6.72521	-2.60036	0.0100195	0.0455378038072036	-3.52074
GYPA	-1.64214	5.44909	-2.5992	0.0100525	0.0456526745019418	-3.52365
LASP1	-0.533554	11.0752	-2.59911	0.0100551	0.0456526745019418	-3.52387
DFFB	0.611191	6.96674	2.59692	0.0101171	0.0459109814813546	-3.52933
SKP2	0.474413	7.83696	2.59671	0.0101231	0.0459148670732481	-3.52985
CTSO	-0.615753	7.79225	-2.59627	0.0101356	0.0459480536145491	-3.53095
HDAC2	0.507934	9.49602	2.59501	0.0101715	0.0460874917294263	-3.53408
KIAA0753	0.347842	7.87655	2.59204	0.0102568	0.0464502770471526	-3.54148
SH2D2A	1.03882	6.53571	2.58895	0.0103461	0.0468310205154643	-3.54917
IQGAP1	-0.603161	9.34004	-2.58853	0.0103585	0.0468632982851042	-3.55023
PSMB9	-0.76294	10.4149	-2.58718	0.0103976	0.0470162205638819	-3.55356
NOTCH2	-0.666497	7.30465	-2.5863	0.0104235	0.0471095144212287	-3.55577
UBB	0.212816	14.1172	2.58564	0.0104428	0.0471728638039346	-3.55741
NINL	1.4336	7.37568	2.58484	0.0104661	0.0472299245147128	-3.55937
NINJ2	-0.908546	7.73646	-2.58484	0.0104661	0.0472299245147128	-3.55938
ZNF443	0.518587	7.29718	2.58453	0.0104753	0.0472445807619832	-3.56015
EMC3	-0.337753	7.52197	-2.58437	0.0104799	0.0472445807619832	-3.56055
RRP15	0.59574	6.68561	2.58262	0.0105315	0.0474527929101876	-3.56489
ISG20	-0.947892	9.83774	-2.58078	0.0105859	0.0476739557850127	-3.56946
WIPF2	-0.369707	8.47249	-2.58024	0.0106018	0.0477213941663633	-3.57078
SULT1A1	-0.525278	9.04825	-2.57971	0.0106176	0.0477682562432139	-3.5721
BRD3	0.393419	9.21964	2.57885	0.0106431	0.0478591848341419	-3.57423
GALNT14	-0.789911	7.71167	-2.57706	0.0106965	0.0480749038989536	-3.57866
MRPL46	0.450373	8.33036	2.57595	0.01073	0.0482009416467061	-3.58142
GALK2	0.515727	6.05904	2.57496	0.0107595	0.048309465231431	-3.58386
SRSF10	0.472649	9.7751	2.57468	0.0107681	0.0483234409321877	-3.58456
PPP1R16B	0.882338	8.76205	2.57333	0.0108088	0.048481764750313	-3.5879
ICOSLG	-0.660115	7.13943	-2.57241	0.0108365	0.0485815690103064	-3.59017
RAB20	-0.980696	6.86011	-2.57148	0.0108647	0.0486836987058792	-3.59247
CPVL	-1.59425	7.01965	-2.57101	0.010879	0.0487230368107645	-3.59363
MRPL19	0.487039	7.07378	2.5708	0.0108854	0.0487272695807741	-3.59415
SPIDR	-0.596144	5.59839	-2.57048	0.0108949	0.0487454321816439	-3.59493
ZNF10	0.77032	6.633	2.56972	0.0109181	0.0488004165100199	-3.59681
RPS12	0.177475	14.4484	2.56972	0.0109182	0.0488004165100199	-3.59681
ASAP1-IT1	-0.939416	6.1964	-2.56922	0.0109334	0.0488436864714485	-3.59804
GSR	-0.701767	7.42041	-2.56894	0.0109419	0.0488575247655305	-3.59873
NONO	0.562989	11.121	2.56858	0.010953	0.0488726416305709	-3.59963
HYAL3	-0.948097	5.52917	-2.56847	0.0109563	0.0488726416305709	-3.59989
SORT1	-0.856635	5.78733	-2.56653	0.0110157	0.0491131723965267	-3.60468
[truncated: 6,910 more rows]

## Sheet: S4 Table
Supplementary Table S4. ESTIMATE Scores and immune infiltration data for ALL samples (TARGET-ALL Dataset)
ID	StromalScore	ImmuneScore	ESTIMATEScore	Tumor Purity
TARGET-10-PATFWF	-1509.59	2271.82789925084	762.236542725458	0.753862839370035
TARGET-10-PATGKE	-1547.13	3020.03375607486	1472.89984978752	0.681349333056601
TARGET-10-PAPAGK	-1673.81	2393.42530508471	719.618089383752	0.757958382770266
TARGET-10-PARHBI	-1719.79	1915.56035168481	195.772012593077	0.805827780060317
TARGET-10-PARXMV	-1632.91	1957.48368795677	324.568916964668	0.794489313516379
TARGET-10-PAPHMH	-1615.43	1959.89376066932	344.458857968076	0.792712912971235
TARGET-10-PARMKM	-1465.44	2833.51470963275	1368.07098547093	0.692531352968657
TARGET-10-PARASZ	-1509.02	2626.64997778345	1117.62667924537	0.718577353184169
TARGET-10-PATHWV	-2085.38	1512.57427617767	-572.807	0.867368784946515
TARGET-10-PAPSPG	-1426.24	2437.14265893497	1010.90185881806	0.729383581284855
TARGET-10-PARBGL	-1543.26	2383.04	839.782110767517	0.746335307986834
TARGET-10-PANEUH	-1510.54	2287.72317613978	777.180661446513	0.752419746433756
TARGET-10-PAUBCT	-739.899	3597.49060403853	2857.59133777683	0.519570215102919
TARGET-10-PAPEWB	-1500.82	2123.0641889765	622.247617713533	0.767203918050492
TARGET-10-PARGFV	-1364.27	2536.26399696152	1171.99891733483	0.713004014077696
TARGET-10-PAPNFY	-1535.01	2636.05306965808	1101.04201713588	0.720268243520946
TARGET-10-PASXZH	-1370.25	2259.16028389614	888.906627899654	0.741516580109887
TARGET-10-PASXMF	-1900.81	1795.69305655085	-105.12	0.831187185942456
TARGET-10-PAPBSY	-1631.57	2086.56973555855	455.004536847411	0.782717192141122
TARGET-10-PASHUI	-1428.99	2370.01181449659	941.019121589331	0.736362615139261
TARGET-10-PAPCUR	-745.471	3569.6	2824.12967152076	0.523760695732507
TARGET-10-PARGML	-834.742	3473.97599966641	2639.23354218879	0.546685110103831
TARGET-10-PASRWZ	-1635.48	2501.57247826945	866.090011091939	0.7437595208466
TARGET-10-PAKVKK	-1475.04	2630.62513113874	1155.58693925884	0.714691099436507
TARGET-10-PAPBZK	-1251.35	3561.76035425981	2310.40603605626	0.586449403742016
TARGET-10-PATELK	-1914.07	2258.83367114791	344.760185947544	0.792685948917536
TARGET-10-PASSEF	-1947.74	1770.6497100858	-177.093	0.837014628529167
TARGET-10-PARGHW	-1610.79	2259.16619342763	648.375126070289	0.764738362217468
TARGET-10-PAPFXN	-1353.3	2712.18099894597	1358.88024008846	0.693503942956248
TARGET-10-PANTSM	-1531.71	2369.41907512827	837.709330392323	0.746537779884494
TARGET-10-PASHDV	-1683.72	1929.16341287447	245.448291232008	0.80148849551045
TARGET-10-PAPJHB	-1440.59	2541.51445765997	1100.92803417804	0.720279849902916
TARGET-10-PARMMV	-1656.38	2237.58209175008	581.204940597121	0.771054162619696
TARGET-10-PATITB	-1430.52	2141.76787891633	711.243713959201	0.758759660540819
TARGET-10-PARJAY	-1476.87	2263.90725263539	787.039713179333	0.751465715123018
TARGET-10-PATDKT	-1837.97	1394.38059024511	-443.588	0.857773617316108
TARGET-10-PAPZNK	-2010.98	2002.92865326475	-8.05196	0.823181029404386
TARGET-10-PASDYK	-1401.74	2363.46740171202	961.728541791131	0.734302457031545
TARGET-10-PAKYEP	-1619.71	2646.85705603841	1027.14770551222	0.727750122551523
TARGET-10-PARSZH	-1237.16	3006.51028689166	1769.35451250365	0.648862388930667
TARGET-10-PATMTV	-1907.51	1895.89983206595	-11.6095	0.823477416470663
TARGET-10-PASTYT	-1723.44	2515.66941888167	792.226767765884	0.750963147206763
TARGET-10-PANZXZ	-1405.02	2873.80711854368	1468.79080735919	0.681790696941961
TARGET-10-PAPMFI	-1602.63	2014.29765204971	411.671294370296	0.786660160947027
TARGET-10-PATHGY	-1638.62	2406.63246053759	768.01556341095	0.753305212566984
TARGET-10-PANFNZ	-1355.41	2415.6117811999	1060.20006100335	0.72441406729446
TARGET-10-PATFVG	-1703.84	2040.98121387081	337.145313943927	0.793366882903945
TARGET-10-PATHJF	-1359.92	2620.73927220914	1260.8218836672	0.703801820262645
TARGET-10-PASXUU	-2063.77	1660.95696587922	-402.809	0.854681405221779
TARGET-10-PATGXS	-1762.11	1743.21438292007	-18.8939	0.824083590967529
TARGET-10-PASEVJ	-1407.46	2517.59212750699	1110.13276580705	0.719341923626061
TARGET-10-PANWHW	-1692.56	1692.95850130065	0.399574426849085	0.822476016358527
TARGET-10-PARPET	-1862.31	2071.1168277442	208.810942369484	0.80469295126082
TARGET-10-PASMNV	-1879.55	2091.32796497448	211.781056122829	0.804434038339492
TARGET-10-PASXLZ	-1815.75	1848.08991528819	32.3446095560187	0.819799790187578
TARGET-10-PAPMYD	-1419.55	2736.14899468122	1316.60082191014	0.697961781379473
TARGET-10-PANIEU	-1547.7	2859.74791051482	1312.04459509342	0.698440577231841
TARGET-10-PATRXL	-1982.58	1502.03763133425	-480.544	0.860549445288139
TARGET-10-PAPHYN	-1399.25	2286.21736460618	886.962539434814	0.741708014260159
TARGET-10-PATLHS	-1830.19	1915.40798594834	85.2138079237527	0.815331047081048
TARGET-10-PATJBC	-1899.21	1683.3406572554	-215.868	0.840115447997888
TARGET-10-PATHFE	-1923.87	1665.95595168467	-257.917	0.843447350512189
TARGET-10-PATMAF	-1645.3	1784.53902582408	139.235260629615	0.810714190873988
TARGET-10-PAPDUF	-1369.09	2935.91724408827	1566.82418809583	0.671193385058289
TARGET-10-PARUYU	-1893.93	2022.57927131718	128.650761586989	0.811622802734981
TARGET-10-PATKWU	-1827.67	1382.53743980587	-445.137	0.857890511996592
TARGET-10-PAUCDC	-1968.72	1670.11164009222	-298.608	0.846641024791896
TARGET-10-PASKAY	-1496.09	2856.01697080905	1359.92223098001	0.693393740016645
TARGET-10-PAPHPX	-1588.3	2653.02811198156	1064.72791200819	0.72395573045215
TARGET-10-PARKLK	-1946.11	1685.98293899833	-260.123	0.843621263920037
TARGET-10-PATMRE	-1453.46	2007.72024313088	554.25689076496	0.77356696822574
TARGET-10-PATDBU	-2031.8	1564.96579544446	-466.839	0.85952300906438
TARGET-10-PANWEZ	-1681.57	1434.43050544187	-247.136	0.842596154134885
TARGET-10-PANYZE	-1591.28	2247.05793435908	655.775984819063	0.764037924737705
TARGET-10-PAPDKJ	-1587.12	2388.60136028627	801.478928677714	0.750065635041654
TARGET-10-PAPEAB	-1543.2	2373.73632901104	830.534258141885	0.747238116536604
TARGET-10-PATBTX	-1096.03	3307.48175332965	2211.45143264313	0.598152483389471
TARGET-10-PASLCJ	-1557.01	2813.95408167535	1256.94164689559	0.704206329199757
TARGET-10-PARPZJ	-1408.97	3249.12881050683	1840.16210651848	0.640918831631896
TARGET-10-PARWVN	-1565.14	2883.79271594439	1318.65250554009	0.697746076106633
TARGET-10-PANSDA	-1200.91	2444.28720655948	1243.37758276601	0.705618566807122
TARGET-10-PATSIL	-1654.49	1995.16576300907	340.677683765144	0.793051135974657
TARGET-10-PARMWH	-1858	1927.20051045407	69.1961074977887	0.816690132669753
TARGET-10-PARRKK	-1571.35	2650.28627145111	1078.93952592454	0.722515067546585
TARGET-10-PAUBXP	-1936.69	1810.08256982164	-126.603	0.832936312571856
TARGET-10-PARAKF	-1693.41	2476.99498454771	783.581079172168	0.751800576236441
TARGET-10-PAPEJN	-1462.83	2593.30783352009	1130.48196909525	0.717263760875854
TARGET-10-PANRYM	-1371.83	2905.41817079247	1533.58643618411	0.674802036600258
TARGET-10-PARJXW	-1974.24	1687.97082868405	-286.268	0.845675679586637
TARGET-10-PARMKK	-1925.57	2259.50097594842	333.926694030845	0.793654399039694
TARGET-10-PARUGP	-1859.4	2169.2857311492	309.887346371768	0.79579620308941
TARGET-10-PASTHE	-1923.11	1705.64658073303	-217.462	0.840242325176101
TARGET-10-PASYHN	-1951.52	1907.63849339773	-43.8835	0.826155947119158
TARGET-10-PARNBN	-1417.42	2369.85034403041	952.432161532164	0.735228094689255
TARGET-10-PASTSR	-2073.55	1372.71612247641	-700.829	0.87656728882161
TARGET-10-PATGWP	-1497.49	2436.54819199633	939.056696765358	0.736557483076072
TARGET-10-PASYAJ	-1539.06	3099.29703078993	1560.24117518382	0.671909380025586
TARGET-10-PASHXL	-1985.1	1778.45902029686	-206.639	0.839379906388171
TARGET-10-PAPGNC	-1206.49	2880.73251610982	1674.24617559386	0.659421665783888
TARGET-10-PATPWF	-1835.84	2287.17286677587	451.329368577498	0.783052833525332
TARGET-10-PAPACP	-1702.87	1934.92569410336	232.057221997794	0.802662427266687
TARGET-10-PANATY	-1385.4	2402.04396560862	1016.6487694406	0.728806224696123
TARGET-10-PATRHL	-1628.96	2383.63534471978	754.678606272156	0.754591297829574
TARGET-10-PARTJL	-1437.42	3244.80536428071	1807.38429297594	0.64460467333902
TARGET-10-PAPLTZ	-1645.6	1837.08192206601	191.483386272931	0.806200390965359
TARGET-10-PATDMN	-1770.18	1900.03200847533	129.854277094752	0.811519587269914
TARGET-10-PARJLA	-1824.24	1662.90211819268	-161.336	0.83574677072643
TARGET-10-PASLMB	-1619.21	2392.92903003109	773.71486128884	0.752754747427477
TARGET-10-PARFIH	-1991.87	1472.18219996604	-519.69	0.863462158761721
TARGET-10-PANZPJ	-575.687	2725.57435625791	2149.88716086074	0.605369989229364
TARGET-10-PATVDA	-1389.44	3179.47010368862	1790.02574703678	0.646550590999324
TARGET-10-PANUUF	-1384.3	2329.83889038295	945.534947549789	0.735913963518583
TARGET-10-PATDLG	-1797.75	1997.84300365402	200.091782430184	0.805452140464121
TARGET-10-PATEHZ	-2041.49	1812.73271606071	-228.761	0.841140465274143
TARGET-10-PAPRMM	-1601.7	1897.12423635156	295.422897185502	0.797080151087199
TARGET-10-PASTLM	-1272.53	3107.8850248414	1835.35253761675	0.641460595073464
TARGET-10-PATITY	-2117.25	1062.03424383341	-1055.21	0.900406140974997
TARGET-10-PAPJHR	-1749.49	1944.48179803804	194.994632888069	0.80589534523834
TARGET-10-PASSSR	-2034.01	1914.54661932324	-119.459	0.83235561599897
TARGET-10-PATXNR	-1993.96	2031.15888012479	37.1968692619903	0.819391709024658
TARGET-10-PASTDU	-1894.48	1331.91852111758	-562.557	0.866618969360503
TARGET-10-PASWSR	-1724.19	2300.14611201952	575.959035483998	0.771544270743129
TARGET-10-PAKKXB	-1430.84	2370.39364941607	939.549987520721	0.736508505267393
TARGET-10-PANDBX	-1329.13	2367.94999030902	1038.81699649348	0.726574264735481
TARGET-10-PATWXC	-1754.29	2538.1960205196	783.906547554723	0.75176907300622
TARGET-10-PATAAH	-1521.98	1966.15228919369	444.168287969223	0.783706177425822
TARGET-10-PATRUN	-2175.08	1338.22273143498	-836.858	0.886001809495421
TARGET-10-PANUHA	-1683.42	1830.33239556722	146.912236465744	0.810053946777598
TARGET-10-PASNJI	-1499.34	1845.75543083397	346.419151555713	0.79253747015366
TARGET-10-PASHUP	-1955.78	2361.48375905596	405.701924113721	0.787200833905141
TARGET-10-PASDYM	-1914.63	1400.1665781061	-514.46	0.863074692348166
TARGET-10-PAPCVZ	-1345.67	2843.04635934696	1497.37813140435	0.678714920378591
TARGET-10-PAPHEK	-653.727	3107.75051206508	2454.02311049357	0.569244786186388
TARGET-10-PAPJIB	-1592.24	2162.34836923738	570.103464510668	0.77209079764668
TARGET-10-PAPTAT	-1496.99	2228.03188012378	731.037783304504	0.756863876972404
TARGET-10-PAUBPY	-1709.19	1957.40877565081	248.215474026769	0.801245523437288
TARGET-10-PAPZST	-1203.76	2544.9743587466	1341.21633541529	0.695369640348356
TARGET-10-PANCVR	-1909.96	2073.9218290653	163.961402388576	0.80858398706811
TARGET-10-PAUBTC	-1876.53	1952.90173103699	76.3698012829509	0.816082009817325
TARGET-10-PAMXHJ	-1574.18	2614.39655171287	1040.22115350797	0.726432630885673
TARGET-10-PANJPG	-1500.1	2652.44246821322	1152.33878728745	0.715024505015884
TARGET-10-PAPDUV	-1265.18	2367.82566415815	1102.64478750226	0.720105019132286
TARGET-10-PAPIRZ	-1730.44	2818.11883061973	1087.6784328028	0.721627623554293
TARGET-10-PASWNU	-2118.26	1133.13371705824	-985.126	0.89588281183071
TARGET-10-PATZYC	-1692.35	2474.39416496498	782.039411120855	0.751949776397416
TARGET-10-PATDDZ	-1931.55	1786.12455519804	-145.428	0.834462266046423
TARGET-10-PATLGU	-1385.06	2712.90216993237	1327.83819289828	0.696779556425762
TARGET-10-PASPBU	-1933.64	1654.93214544541	-278.704	0.84508259917751
TARGET-10-PASJMK	-1468.16	2310.80475821445	842.646	0.746055400890348
TARGET-10-PAMDRM	-1494.71	2567.05911835421	1072.34817765147	0.72318363853019
TARGET-10-PANYGB	-2048.98	1703.3347012051	-345.646	0.850295194802316
TARGET-10-PASKIC	-2044.81	1611.63803803511	-433.169	0.856986513088849
TARGET-10-PANXDB	-1514.3	2364.30798733542	850.011034453435	0.745335121932835
TARGET-10-PARSJG	-1647.67	2293.66676125178	645.999781227379	0.764962980057576
TARGET-10-PANKMB	-1409.3	2953.16203056248	1543.85917851365	0.673688427135213
TARGET-10-PARPRW	-1490.96	2721.97807831073	1231.01844569264	0.706902916672231
TARGET-10-PATCTI	-1498.56	2528.06846862621	1029.50985679074	0.727512272289371
TARGET-10-PATIBE	-1845.14	2081.69914977376	236.559239175238	0.802268102529177
TARGET-10-PASPDS	-1836.54	2327.82811852124	491.290783805481	0.779391072998456
TARGET-10-PATFJD	-1835.78	1494.26396089113	-341.516	0.849975999156905
TARGET-10-PARYAJ	-1736.42	2072.28268492217	335.864196917291	0.793481345041106
TARGET-10-PATEVL	-1828.8	2349.54056888335	520.738728071382	0.776675517473705
TARGET-10-PATDGZ	-1569.3	2246.56713458576	677.271949890673	0.761998377894319
TARGET-10-PATCKV	-1748.85	1873.47864885495	124.629852886969	0.811967458762102
TARGET-10-PATYCH	-1463.29	2845.53405369072	1382.24688608822	0.691028749371241
TARGET-10-PASMIC	-1924.56	1768.10534353858	-156.456	0.835353197458736
TARGET-10-PARVMR	-1855.92	2092.36793573866	236.451614121685	0.802277533329986
TARGET-10-PATAXS	-1362.07	2607.89547992818	1245.82293621542	0.705364172643165
TARGET-10-PANRDC	-1253.4	3112.81989156768	1859.41517850755	0.638746914974708
TARGET-10-PASLZM	-1754.82	2059.48964426382	304.668938843528	0.796259833030288
TARGET-10-PATJZK	-1806.66	2151.06263185143	344.401863308221	0.792718012910898
TARGET-10-PATEYS	-1813.19	2390.52907992659	577.340008993638	0.771415295161632
TARGET-10-PAPSPN	-1205.75	2485.34434567778	1279.59813428397	0.701841200755292
TARGET-10-PATSIY	-1990.78	1209.71838953681	-781.06	0.88217434860112
TARGET-10-PATWIJ	-1830.57	2111.14634214954	280.577467405917	0.798394180593476
TARGET-10-PAPMVB	-1408.61	2299.77523785724	891.167462787954	0.741293880034241
TARGET-10-PATEAK	-1858.41	2384.35864474047	525.949144516332	0.776193524077226
TARGET-10-PARFXJ	-1632.25	1867.34253132309	235.090005926389	0.802396828923452
TARGET-10-PASSZA	-1909.21	2171.89788657178	262.689218920133	0.799972505270554
TARGET-10-PASUSV	-2009.12	2024.65849394964	15.5415575237696	0.821209732987607
TARGET-10-PATTHR	-1491.14	2556.61838980624	1065.4754753493	0.723880026742632
TARGET-10-PARLST	-1076.91	3167.83548024275	2090.92659005421	0.612235911432851
TARGET-10-PANSUL	-1640.02	2393.05316500747	753.028328471218	0.754750233457122
TARGET-10-PARNMF	-1561.53	1989.17017960158	427.645062152761	0.785210374821482
TARGET-10-PARAPE	-1635.72	2127.29318645426	491.576645005709	0.779364782093886
TARGET-10-PATZFF	-1741.9	2057.76070680147	315.863650661483	0.795264664161676
TARGET-10-PANJWJ	-1009.5	3002.5763782873	1993.07796035269	0.623528872600473
TARGET-10-PASIIY	-1964.68	1546.93332121652	-417.743	0.85581740852523
TARGET-10-PATFRM	-308.986	3216.83008161678	2907.84448548915	0.513253382426479
TARGET-10-PATGVX	-1656.69	1750.61177221765	93.9187302934286	0.814590552422159
TARGET-10-PASYGM	-1221.84	3360.00957377731	2138.16486941511	0.606738670696378
TARGET-10-PATAYT	-1782.34	1986.95861160453	204.622013580803	0.805057851622504
TARGET-10-PASJJR	-1603.34	2319.28493226526	715.944075860423	0.758310061163251
TARGET-10-PASKSY	-1376.08	2862.13630932278	1486.05541302265	0.679934590335308
TARGET-10-PASIGB	-1642.82	2640.00485848663	997.188311097496	0.730759198827872
TARGET-10-PANDWE	-1146.84	3333.02532314018	2186.18342089449	0.601120730039922
TARGET-10-PAPHGD	-1627.96	2489.27602364417	861.312087062001	0.744228149262791
TARGET-10-PASTXU	-1901.62	1704.2722105432	-197.346	0.838637608497631
TARGET-10-PAPRCS	-1545.86	2451.03830424646	905.181159221741	0.739911661894781
TARGET-10-PATSLH	-1838.99	1733.37164114531	-105.614	0.831227492828265
TARGET-10-PANWYH	-1329.28	2298.28331970828	969.006568892209	0.733576831786305
TARGET-10-PATSDS	-1694.81	2257.47788168757	562.668066781893	0.77278395484862
TARGET-10-PARLEK	-1488.16	2344.92680154511	856.762335974475	0.744674057752837
TARGET-10-PATLNS	-1750.85	1615.03570420702	-135.812	0.83368358146997
TARGET-10-PATFYZ	-1529.61	2611.81801368534	1082.21051503775	0.722183034749804
TARGET-10-PARPYJ	-1709.27	1922.71111583663	213.441255231295	0.804289247627863
TARGET-10-PARNMV	-1839.99	2016.78838189185	176.799168788294	0.807473786608766
TARGET-10-PATBNT	-2044.03	1261.26837595715	-782.758	0.882291691359371
TARGET-10-PARYGI	-2137.76	1333.66032821499	-804.098	0.883761861665189
TARGET-10-PARHBT	-1781.41	2165.43052010914	384.021044388347	0.789159482418759
TARGET-10-PARPUL	-1646.04	2864.02673251807	1217.98662489763	0.708254651130847
TARGET-10-PAPIJB	-1541.38	2122.08950894246	580.709706635029	0.771100450291707
TARGET-10-PAKTAL	-1317.5	2396.03648430039	1078.5333489244	0.722556286290328
TARGET-10-PAUAFN	-1855.59	1896.8783743806	41.2913145985103	0.819047037625281
TARGET-10-PATLPN	-1611.99	2545.68345506731	933.692910057572	0.737089792905043
TARGET-10-PASMGZ	-1702.53	1782.10751797806	79.5775402872189	0.81580979301176
TARGET-10-PATXAL	-1808.49	1935.27069206357	126.778668129179	0.811783306194919
TARGET-10-PATWHB	-1593.9	2322.16633767459	728.265996288271	0.757129730885017
TARGET-10-PANSIA	-1395.94	2456.97280981833	1061.03293967505	0.724329782220123
TARGET-10-PARWDM	-1656.74	2294.89194510156	638.150575745119	0.765704556667556
TARGET-10-PAPDJM	-1596.78	2454.84467583732	858.061945658442	0.744546720489283
TARGET-10-PASRYW	-1299.4	2969.90290726206	1670.50484406377	0.659834428231113
TARGET-10-PANKRG	-1465.9	2712.83193191337	1246.9351618529	0.705248435899827
TARGET-10-PARJNX	-1806.23	1462.99986548089	-343.228	0.850108342838474
TARGET-10-PAPTLM	-1691.43	1736.8820582453	45.4541896361377	0.818696302482166
TARGET-10-PASLAB	-1900.2	2004.64621544438	104.443478420066	0.813693476079384
TARGET-10-PASFXA	-1548.03	2728.02223827905	1179.99145084884	0.712180914857131
TARGET-10-PANSFD	-1250.65	3209.00694411539	1958.35925649151	0.627505049453928
TARGET-10-PATGMP	-1475.51	2851.82324925666	1376.31711704781	0.691657651780934
TARGET-10-PARMFF	-1186.97	3005.29386799972	1818.32736176041	0.643375788195753
TARGET-10-PATLHH	-1899.42	2367.4611863799	468.040009679677	0.781524867826423
TARGET-10-PATZVD	-1891.54	1605.4797107458	-286.058	0.845659258048323
TARGET-10-PARTBP	-1679.6	2138.97959061075	459.383541867526	0.782316974192393
TARGET-10-PAPLDL	-1188.15	2520.90284328838	1332.75379668768	0.696261815259538
TARGET-10-PAPLDM	-1565.83	2115.3125983447	549.479968764171	0.774011136599941
TARGET-10-PARPNM	-1985.76	2290.41405445366	304.649564401846	0.796261553484141
TARGET-10-PARMUC	-2187.26	1540.79355188512	-646.465	0.872698824136609
TARGET-10-PASILW	-1536.18	2712.38460331412	1176.1996687252	0.712571528201976
TARGET-10-PASREU	-1521.33	2076.86446180275	555.534306152044	0.773448126961287
TARGET-10-PATEMI	-1482.56	2422.10626969442	939.544908920923	0.736509009530633
TARGET-10-PATLMA	-1615.48	2936.90635550012	1321.42441700912	0.697454548643846
TARGET-10-PARGVZ	-1569.02	2239.80204808128	670.783945894756	0.762614762919725
TARGET-10-PANXDR	-1659.89	2403.63220380277	743.744349669537	0.755643532976542
TARGET-10-PASILP	-1460.07	2912.53452039274	1452.46268973971	0.683542093629479
TARGET-10-PASRMM	-1923	1207.3661253603	-715.63	0.877610833036919
TARGET-10-PAPDWT	-1535.14	2108.36980089906	573.233552230374	0.771798723348841
TARGET-10-PARBVI	-1730.41	2102.09042614723	371.682994345077	0.790270533404131
TARGET-10-PARNSH	-1181.91	2736.11083487981	1554.2021495445	0.672565656991771
TARGET-10-PANSPW	-1466.82	2991.44330288398	1524.62454828736	0.675772290713907
TARGET-10-PATKVD	-1614.2	2470.3973765063	856.199780148721	0.744729169220782
TARGET-10-PARNJB	-1380.97	2637.44007655892	1256.46698350358	0.704255796475496
TARGET-10-PASTLP	-1917.96	1489.4832556322	-428.481	0.856631630405416
TARGET-10-PASWFN	-796.69	3022.82458976655	2226.13504686046	0.596423808515831
TARGET-10-PARFLV	-1591.45	2299.5846000262	708.133737289727	0.759056937724555
TARGET-10-PANTTZ	-1604.83	1928.55797757515	323.727258096277	0.794564334090457
TARGET-10-PANPJI	-950.468	2381.01759064912	1430.54958970842	0.68588637738887
TARGET-10-PANUSN	-1376.49	2616.06654760709	1239.58041917808	0.706013411808807
TARGET-10-PARUAT	-1606.21	2286.94965617691	680.739387238083	0.76166867475421
TARGET-10-PATRAB	-1722.64	2466.22213421561	743.578728665313	0.755659456205836
TARGET-10-PARHES	-1569.62	2192.18641591819	622.570116467334	0.76717355375291
TARGET-10-PATGLV	-1511.93	2116.06525057166	604.135004399641	0.768906517105838
TARGET-10-PASWXZ	-1562.57	2513.59651473297	951.02526093132	0.73536806010515
TARGET-10-PAKHZT	-1598.78	2667.91289127267	1069.13089482478	0.7235097268383
TARGET-10-PARDWN	-1635.99	2019.56507777433	383.570392097994	0.789200109575171
TARGET-10-PAUAZV	-1685.94	2454.9386404389	769.002494980932	0.753209927782462
TARGET-10-PASINX	-1587.14	2602.67090110332	1015.53035749988	0.728918625288789
TARGET-10-PARWID	-1763.74	1469.21059507347	-294.528	0.846322126154976
TARGET-10-PANYYV	-1578.31	2304.68836781331	726.380709621458	0.757310485154748
TARGET-10-PATPGE	-1549.27	2402.45353534192	853.183025966637	0.745024622581652
TARGET-10-PANGIF	-1742.59	2003.60123559234	261.01009539656	0.800120375518295
TARGET-10-PANNGL	-1542.62	2162.35296344029	619.736118284001	0.767440324985222
TARGET-10-PARVWD	-1523.31	2278.91815505817	755.610223598408	0.754501555693281
TARGET-10-PARDWE	-1645.25	2917.8981498462	1272.6494176244	0.702567409235564
TARGET-10-PANSXG	-1641.6	2497.03201570744	855.435693257666	0.744804015792434
TARGET-10-PARMIH	-1835.84	1735.12365546007	-100.718	0.8308277792008
TARGET-10-PAUACG	-1714.71	1225.1926721527	-489.514	0.861219413850386
TARGET-10-PATGZA	-1189.16	2513.28007597031	1324.11918547789	0.697171023772411
TARGET-10-PASSHC	-2165.78	1455.14628051191	-710.629	0.877258714376829
TARGET-10-PATCNI	-1942.12	2022.9365375398	80.8174062795661	0.815704526392994
TARGET-10-PASXLT	-1484.59	2505.66942723833	1021.07648118081	0.72836104612082
TARGET-10-PARUEU	-1667.71	1795.66258755811	127.950260455569	0.811682867199447
TARGET-10-PATIKN	-2006.83	1915.16070806794	-91.6723	0.830088047859182
TARGET-10-PATBDJ	-1469.6	2675.16235263742	1205.56322712599	0.709540863555016
TARGET-10-PANLIC	-1446.2	2157.57267912195	711.372693635092	0.758747328185749
TARGET-10-PATLNZ	-1713.51	2290.90653584349	577.393	0.771410302412913
TARGET-10-PARWMF	-1653.2	1757.39313235928	104.19	0.813715116382942
TARGET-10-PASJYI	-1477.72	2237.75943848655	760.041224436206	0.75407452692945
TARGET-10-PARTKL	-1435.82	2299.17231358617	863.350649396836	0.744028247722687
TARGET-10-PARJSR	-1367.25	1844.12192680414	476.87558385493	0.780715071136537
TARGET-10-PATCDM	-1936.94	1854.43085892785	-82.5117	0.829337461346848
TARGET-10-PAPESW	-1437.39	2584.08305068102	1146.69756437336	0.715603160301334
TARGET-10-PATGYH	-1788.28	1798.4282054002	10.1493708191326	0.821661132524511
TARGET-10-PAPKNJ	-1682.24	2096.62567771567	414.385890856119	0.786414087811698
TARGET-10-PANXPE	-1730.15	1927.46561213632	197.313243581314	0.805693794490808
TARGET-10-PARSNX	-1569.35	2952.48046527659	1383.13132199069	0.690934902547081
TARGET-10-PASKXN	-2072.41	842.62619427989	-1229.78	0.911257176503283
TARGET-10-PASUWG	-1378.46	2399.54341414311	1021.08268769052	0.728360421879308
TARGET-10-PASKHT	-1350.57	3360.32273855035	2009.75077472257	0.621613648004405
TARGET-10-PASMHF	-1703.49	2462.36904600574	758.879811508058	0.75418648661343
TARGET-10-PARIYD	-1546.99	2479.84757880641	932.85992838621	0.737172418210621
TARGET-10-PASFHR	-1784.07	2134.93321047031	350.860906620189	0.792139698135624
TARGET-10-PATFJP	-1542.8	2754.88068548309	1212.07642365892	0.708866836839856
TARGET-10-PARGFL	-2002.63	1684.07399930587	-318.553	0.84819541750502
TARGET-10-PASUGC	-1930.82	1717.85676314956	-212.968	0.83988444482986
TARGET-10-PAPBES	-1543.57	2736.34597593725	1192.77707944483	0.710862167990547
TARGET-10-PARACA	-1581.38	2766.46011159523	1185.07942205347	0.71165642697272
TARGET-10-PATKGP	-1590.74	2297.64054456784	706.903229283508	0.75917451614089
TARGET-10-PASXIL	-2286.13	1467.20052145227	-818.933	0.88477875951758
TARGET-10-PARXMC	-1717.52	1937.90910746214	220.393699432943	0.803682386340174
TARGET-10-PASZIY	-1798.02	2153.36203502173	355.338869929351	0.79173834269644
TARGET-10-PATEIT	-1965.13	2101.13015419539	135.996905223795	0.810992390952044
TARGET-10-PARNSP	-2052.19	1398.55587363868	-653.631	0.873211891336078
TARGET-10-PAUAJA	-1684.38	2235.82187704646	551.44523408886	0.773828448112001
TARGET-10-PATMXN	-1519.36	2023.6091676407	504.246651375363	0.778198132919585
TARGET-10-PASYSJ	-1533.71	2631.7690328868	1098.05992786859	0.720571830142591
TARGET-10-PATYWV	-1715.16	2367.34872490431	652.186353292937	0.764377769929409
TARGET-10-PAPEFH	-1517.31	2503.06900119287	985.757922217061	0.731903528343625
TARGET-10-PASNEH	-2044.53	1995.55830407999	-48.9763	0.826576924566655
TARGET-10-PARAYM	-2074.72	1285.79330069085	-788.924	0.882717406666302
TARGET-10-PAPJXI	-1369.72	2393.24181825353	1023.51698941587	0.728115536821017
TARGET-10-PATCJJ	-1549.35	2019.5025711445	470.148898402478	0.781331703669745
TARGET-10-PATHBG	-1191.8	2387.21658572254	1195.41831896893	0.710589430671752
TARGET-10-PARMXF	-1740.44	1828.75627517252	88.3185526084628	0.815067090915809
TARGET-10-PARWNW	-1908.01	1542.83492616028	-365.178	0.851800652343166
TARGET-10-PAPBCI	-1505.27	1951.20196714498	445.927482911696	0.783545756816862
TARGET-10-PATJLT	-2017.39	1504.68994199341	-512.695	0.862943797551168
TARGET-10-PARVEI	-1842.96	1709.31248488983	-133.652	0.833508450737424
TARGET-10-PAPIGX	-1403.31	2788.26726475019	1384.95685586308	0.690741159706263
TARGET-10-PAUAYB	-2037.31	1322.99844755638	-714.316	0.877518382844989
TARGET-10-PATTEE	-1668.61	2654.42891906706	985.815333512222	0.731897785877469
TARGET-10-PALJDL	-1560.01	2418.70755873624	858.697569944252	0.744484431417683
TARGET-10-PASHNK	-2105.55	1366.78960468847	-738.764	0.879233638556401
TARGET-10-PATWYZ	-2000.38	1735.17031963842	-265.207	0.844021724773716
TARGET-10-PAPNMY	-1576.27	2790.65321384838	1214.38656972638	0.708627612636952
TARGET-10-PATLRZ	-1448.53	2835.1759078211	1386.64238148968	0.690562231818765
TARGET-10-PATZWA	-1488.37	2655.21984003618	1166.84651273123	0.713534106649842
TARGET-10-PATPDA	-1484.21	2523.98797072291	1039.77492595503	0.726477644102378
TARGET-10-PARUNW	-1397.86	2243.44838792882	845.589794235209	0.745767637935663
TARGET-10-PASKGG	-1537.81	2449.53976382324	911.731669095542	0.739264488865981
TARGET-10-PATRGV	-1585.6	2240.09265911423	654.495016200204	0.764159223656915
TARGET-10-PASKTG	-2013.56	1877.43656412227	-136.119	0.83370852554998
TARGET-10-PATBGC	-1588.33	2019.50789486035	431.180376442328	0.78488892442503
TARGET-10-PARLJA	-1514.32	2048.10684265099	533.787610564657	0.775467565794662
TARGET-10-PAPFWH	-1321.72	2875.84663531739	1554.12666104359	0.672573857184367
TARGET-10-PAUCDY	-1441.96	2556.55740937196	1114.59532261655	0.718886733707813
TARGET-10-PATBRV	-1865.52	2143.8	278.274833640128	0.798597656618234
TARGET-10-PASXUC	-2063.66	1513.70020727754	-549.962	0.865695041917331
TARGET-10-PAPIJM	-1835.38	1790.29602405599	-45.088	0.826255555295152
TARGET-10-PARSLL	-1457.38	2428.13079255634	970.749555697089	0.733402930282444
TARGET-10-PARLAF	-1449.14	2454.01919928912	1004.88353382613	0.729987648792566
TARGET-10-PASSXJ	-1165.54	3406.58060710867	2241.04069310357	0.594666160305298
TARGET-10-PATEVE	-1952.91	1070.66392496174	-882.25	0.889071692678804
TARGET-10-PARTLY	-779.252	2458.96869307547	1679.71698177011	0.658817741022105
TARGET-10-PATKYI	-1552.51	1465.13654880149	-87.3771	0.829736297815795
TARGET-10-PANLGK	-1529.15	2764.10274500856	1234.94940257174	0.706494667456797
TARGET-10-PATDFE	-1620.32	2470.50394663063	850.184886392044	0.745318108129418
TARGET-10-PANYEJ	-1014.97	2091.03024850039	1076.05623597984	0.722807607509467
TARGET-10-PARUBK	-1564.69	2376.87242931393	812.184826103923	0.749025375675899
TARGET-10-PARFDL	-2009.68	1484.00039814671	-525.677	0.863905143199923
TARGET-10-PATCDZ	-2091.98	1475.06575970773	-616.917	0.870572890561346
TARGET-10-PAUBLL	-1583.26	2289.67952806264	706.41566739458	0.759221097166208
TARGET-10-PARVHY	-1564.31	2454.36519721617	890.059110485767	0.741403066781908
TARGET-10-PAUBCB	-2035.85	1700.8354839477	-335.016	0.849472930343336
TARGET-10-PAPAXK	-1575.12	2062.11617111704	486.992278063875	0.779786244839567
TARGET-10-PARZYX	-1927.23	1523.27983394321	-403.949	0.854768260740025
TARGET-10-PARXVS	-1931.23	1877.2218914731	-54.0083	0.826992423928133
TARGET-10-PAPISG	-1527.89	2547.97638238105	1020.08166178528	0.728461095760728
TARGET-10-PATMVH	-2014.9	2065.80358105305	50.899972667014	0.818237016849518
TARGET-10-PANSBR	-1549.37	2491.78164373203	942.415667433725	0.736223901525566
TARGET-10-PARSGC	-1302.91	2924.05871411739	1621.15133406961	0.665260679881103
TARGET-10-PAPIYG	-1690.24	2373.02956428081	682.785857566684	0.761473992425458
TARGET-10-PASJLN	-1892.53	2319.62824843237	427.100403625364	0.785259879401447
TARGET-10-PATHRF	-1866.05	1951.37448219899	85.3271058964381	0.815321417800902
TARGET-10-PAPPGN	-1422.34	2847.5751046664	1425.23616392868	0.686453744540196
TARGET-10-PATALJ	-1139.3	2943.80626931352	1804.5024386527	0.644928023369435
TARGET-10-PATNAM	-1651.38	2406.48409523064	755.099357176661	0.754550768895516
TARGET-10-PASVIN	-1744.22	2033.84825798486	289.628530242952	0.797593484831246
TARGET-10-PATMYZ	-1576.66	1901.52187703676	324.857834223784	0.794463558317142
TARGET-10-PANKGK	-1413.15	2262.18429076061	849.035148740731	0.74543061676266
TARGET-10-PASPPN	-1632.17	1672.9041167834	40.7377305185096	0.819093655766235
TARGET-10-PAREGZ	-1368.15	1965.89453031545	597.747707343861	0.769505632065581
TARGET-10-PASFKA	-1738.44	2506.36514773494	767.92529524994	0.753313926852485
TARGET-10-PATBYK	-1702.68	1869.97331186805	167.290445065602	0.808296369535507
TARGET-10-PARJPL	-1864.64	2128.7016709818	264.058962242769	0.799851844272514
TARGET-10-PANKDT	-1368.26	3078.27532095642	1710.01273042587	0.655465699432268
TARGET-10-PARXLS	-1868.59	1159.63189763783	-708.961	0.877141144170847
TARGET-10-PATZYR	-1775.25	2286.0268304038	510.777884808655	0.777595687873746
TARGET-10-PANWFB	-1452.61	2097.06270653253	644.454209547115	0.765109082778992
TARGET-10-PARXCD	-1877.85	1917.19836503362	39.3490471853697	0.819210575058799
TARGET-10-PANWVW	-1501.26	2351.48522257589	850.225324768927	0.745314150608454
TARGET-10-PATCZN	-1816.36	2598.22485980174	781.859966174079	0.751967140289684
TARGET-10-PASTPT	-1803.94	1760.57369484113	-43.371	0.82611356390868
TARGET-10-PATNIA	-1779.91	2401.83353595616	621.918719954046	0.767234883064289
TARGET-10-PARCVM	-1810.58	1984.48442374645	173.908108785968	0.807724053621413
TARGET-10-PASXFY	-1502.26	2483.83709790039	981.574601771415	0.732321817872868
TARGET-10-PASRCV	-1856.45	2071.79228372591	215.33834608418	0.804123738434915
TARGET-10-PASWZJ	-1898.5	1197.6937026596	-700.806	0.876565655872794
TARGET-10-PARWLP	-1805.74	1948.64744345116	142.90558688087	0.810398659649219
TARGET-10-PANEHF	-1558.42	2299.8013525066	741.383419367594	0.75587047668928
TARGET-10-PAKKCA	-1446.33	2403.06232215442	956.729363407445	0.734800393707037
TARGET-10-PASXSI	-1899.4	2060.75152392804	161.351922360576	0.808809301939112
TARGET-10-PASYWF	-1625.98	2655.17813143132	1029.20127583509	0.727543348958985
TARGET-10-PARFPJ	-1198.26	2875.46234281703	1677.20259469421	0.659095358130709
TARGET-10-PASKRN	-1386.35	3196.40927270328	1810.05573286514	0.644304829218036
TARGET-10-PATYJK	-1259.46	2339.83127561905	1080.37193635513	0.722369686383572
TARGET-10-PASUBW	-1897.58	1569.13805354496	-328.44	0.848963216958556
TARGET-10-PARIAD	-1258.27	3235.79541072568	1977.52991284833	0.625311528924207
TARGET-10-PARFTR	-2122.42	1177.49541877032	-944.928	0.893245617076277
TARGET-10-PAPGFP	-1359.76	1811.01402725366	451.254062605061	0.783059708597045
TARGET-10-PARMSP	-1423.23	2351.58995086924	928.356077144746	0.737618974312967
TARGET-10-PATXNK	-1999.14	1857.04321837455	-142.092	0.834192321110545
TARGET-10-PARIZN	-1686.72	2159.70583552918	472.981906178412	0.781072095811868
TARGET-10-PARNEH	-1526.97	1932.96505037909	405.998702335025	0.787173967628694
TARGET-10-PATXSK	-1672.29	1875.74341557352	203.45513890304	0.805159444650813
TARGET-10-PARBRK	-1423.53	2610.50090624701	1186.96884547862	0.711461556757374
TARGET-10-PARTPW	-2052.91	1217.37586419717	-835.53	0.885911405390752
TARGET-10-PARWRJ	-1696.62	2097.58621602267	400.970244093933	0.78762897424269
TARGET-10-PAPNNX	-1713.71	1843.02774937564	129.312999287947	0.811566011277035
TARGET-10-PAPHJF	-1625.33	2202.34802972974	577.014704189098	0.771445679754573
TARGET-10-PAPLUG	-1584.42	2121.65116021414	537.233899411933	0.775148063337662
TARGET-10-PARJZZ	-1441.64	3254.17372625997	1812.53074832785	0.644026943483219
TARGET-10-PATCUK	-1794.08	2414.23790477123	620.153046022794	0.767401086880681
TARGET-10-PARUFL	-1500.83	2689.45317906785	1188.62610145156	0.711290586636145
TARGET-10-PAMXSP	-1233.67	2744.3064101617	1510.63796580785	0.677284203349413
TARGET-10-PAPRFE	-1874.85	1716.93033018381	-157.916	0.83547099549686
TARGET-10-PAPKNC	-1215.37	2858.56028517138	1643.18797246883	0.662842123422398
TARGET-10-PASGFH	-1792.16	1768.48663286457	-23.6777	0.824481164121947
TARGET-10-PARPHB	-1937.15	1599.51144704451	-337.64	0.849676084852339
TARGET-10-PASLBB	-1809.72	1477.64920613017	-332.067	0.849244486940455
TARGET-10-PASUIN	-2090.4	1622.14259488538	-468.257	0.859629397832278
TARGET-10-PAPGYC	-1270.95	3295.61486019526	2024.66476930512	0.619897305824664
TARGET-10-PATEFF	-1755.77	2125.23143475001	369.45791094953	0.790470628110856
TARGET-10-PANSHK	-1491.05	2832.38251762377	1341.33231695792	0.695357405376149
TARGET-10-PASKCL	-1939.37	1453.74658941004	-485.62	0.860928788159851
TARGET-10-PARFWD	-1144.08	2862.35604611737	1718.27390207658	0.654549398598608
TARGET-10-PAKSWW	-504.561	3477.56654915801	2973.00513213214	0.50502114034778
TARGET-10-PARNXJ	-1710	2629.30042937891	919.300609684918	0.738515846467938
TARGET-10-PATXKW	-1263.55	2921.84528178525	1658.29043887248	0.661180596572959
TARGET-10-PARCHB	-1542.02	3332.68820517135	1790.66514499827	0.646478987965208
TARGET-10-PAPVTA	-1496.96	2088.02741996435	591.069547511358	0.770131305983335
TARGET-10-PARARJ	-1613.88	2295.92763039508	682.052347433796	0.761543779721801
TARGET-10-PANSBK	-1637.7	2282.28592525594	644.58752727369	0.765096481820763
TARGET-10-PARXHT	-1794.01	2111.33818335436	317.332020338643	0.795133972110131
TARGET-10-PATZSL	-2007.62	1483.05075927644	-524.573	0.863823447522671
TARGET-10-PASFLK	-1331.33	2244.55724513676	913.223597000781	0.739116994755451
TARGET-10-PATYMP	-1888.23	1966.79523345642	78.5671752684216	0.815895554646158
TARGET-10-PANWHJ	-1454.19	2573.97825503591	1119.78631226147	0.718356854057893
TARGET-10-PASYIS	-1728.35	1467.00558494832	-261.345	0.843717554162367
TARGET-10-PAPHZT	-1294.79	3041.01941903528	1746.22919271384	0.651441562098692
TARGET-10-PASZEW	-1823.72	1751.11331740082	-72.6061	0.828524147399092
TARGET-10-PASSRP	-1871.63	2086.25689347392	214.624907740385	0.804185988740015
TARGET-10-PATENL	-1793.5	2387.29	593.786101215284	0.769876882494131
TARGET-10-PATBDK	-1945.77	2395.52940543517	449.756945086014	0.783196368337752
TARGET-10-PAPGGT	-1600.77	2754.6018059436	1153.83210299853	0.714871244257138
TARGET-10-PATWJU	-1921.84	2221.62370345877	299.785477483845	0.796693281458163
TARGET-10-PARUKW	-1577.57	2312.40231966976	734.832644068871	0.756499692508672
TARGET-10-PAPAIZ	-1647.86	2340.57536761923	692.718320118969	0.760528133711076
TARGET-10-PATDRC	-1650.99	2630.25786126024	979.267734472401	0.732552363044802
TARGET-10-PARSET	-1307.67	2579.97297742729	1272.30731147109	0.702603143783397
TARGET-10-PASYCN	-1649.75	2761.38362786975	1111.62962030562	0.719189275800179
TARGET-10-PASVPZ	-1977.97	1699.68055372666	-278.286	0.845049781460768
TARGET-10-PAPBFN	-1511.52	2567.49421631279	1055.97686727563	0.724841276432651
TARGET-10-PASCIU	-1603.75	2679.62088811427	1075.86987630373	0.722826511196314
TARGET-10-PASSPP	-1991.93	1782.65140714809	-209.279	0.839590418984217
TARGET-10-PAPECF	-1412.86	2504.30726971209	1091.44774720576	0.72124447959844
TARGET-10-PANKAK	-1670.4	2063.62938129564	393.233616761866	0.788328194975865
TARGET-10-PASWXB	-1797.26	1922.5230764938	125.261858386425	0.811913304540204
TARGET-10-PASZJW	-1835.11	2496.66002415806	661.554902428117	0.763490365218486
TARGET-10-PATGBY	-1795.14	1836.04765672422	40.910639499635	0.819079095423899
TARGET-10-PARMRF	-1469.39	2962.14411403419	1492.74975521683	0.679213710386446
TARGET-10-PANRWG	-1237.03	3117.48098987198	1880.45438017697	0.636367674168803
TARGET-10-PASKAD	-1448.16	3189.81893157975	1741.65854619139	0.651950440051336
TARGET-10-PATRNA	-1521.15	2744.08717184296	1222.9341448311	0.70774177119122
TARGET-10-PASNTZ	-1677	2215.10514365436	538.108343627091	0.775066962815826
TARGET-10-PATWYL	-1706.14	2168.60635241956	462.469123590753	0.782034774173288

## Sheet: S5 Table 
Supplementary Table S5. Expression levels of the nine prognostic genes and corresponding IRGPI risk scores in ALL samples
Univariate Cox analysis						LASSO
Gene symbol	HR	z	P.Value			Gene symbol	Coef
NLRP3	0.939256235596164	-1.02314	0.306242653354887			CD74	0.000103909147456285
CD74	1.43938505170054	8.25211327000397	1.55617817774063e-16			CCL5	0.0488627338538978
GZMB	1.03591052110995	0.870579079701027	0.383984023321336			IL18	0.0602729237401238
MMP9	0.936557262763671	-1.59512	0.110684925778321			TLR1	-0.108521
FCGR3B	0.901427324701306	-3.20813	0.00133599843432888			PRF1	-0.0451281
CCL5	1.3917923383944	6.33350606138896	2.39651887994849e-10			LGALS3	0.00243959540290798
NOD2	1.09222037742026	1.5337546476591	0.125090024100329			FCGR2A	0.065803717033518
ICAM1	1.21050235960983	3.01301618951253	0.00258665118084602			CD83	-0.0636105
IL18	1.14930546423289	2.44399937790442	0.0145254515852143			IL6R	-0.226371
TLR1	1.15241313500684	2.62174843663164	0.0087479976890046			CD44	0.0166000214787993
PRF1	0.860273599120187	-3.40687	0.000657114408804018			CCL20	0.0194981484722115
TNFRSF1B	1.29398474151958	3.6517367849534	0.000260472782286487			CCL2	0.0342915010217185
CLEC7A	0.992948150411615	-0.166288	0.867930255128363			TTK	-0.0383518
CD86	1.15753026059271	3.15190685813715	0.00162208006402053			CD19	0.193605877212338
LGALS3	1.20867915523769	2.99024768869021	0.00278751312310672			CTSS	0.137794686933778
TLR4	0.881160744440513	-3.08435	0.00203997154021234			CCL4	0.0782479996383077
FCGR2A	1.18306001554566	2.50898817996588	0.0121077535801702			ASPM	-0.125228
CD36	0.986535639203243	-0.262757	0.792738061906326
PTGS2	0.937795678879059	-1.54847	0.121509782775808
CXCL8	0.929869865848704	-1.97774	0.0479582820034751
CD83	1.13195387940056	1.98987169405335	0.0466050712063535
IL6R	0.868348749579616	-2.63743	0.00835366041159951
CD44	1.24157256262072	2.7716990923478	0.00557645592428432
CCL3	1.09830807293917	2.23811841749253	0.0252133339202412
CCL20	1.07845692409766	2.58161880824528	0.00983381366117104
IL1RN	1.12346870788146	2.53940346339794	0.0111041685383804
ITGAX	0.899656846674386	-1.97129	0.0486912243302632
CASP1	0.897401334737766	-1.63147	0.102791619061888
CSF1R	1.02180228828804	0.334117696932881	0.738290746475733
CYBB	0.9732107377517	-0.587447	0.556903256952855
TLR8	0.927677060290774	-1.92451	0.054290332581504
SPI1	1.55654228296746	6.81348629593797	9.52614371349886e-12
CCL2	1.12846900347065	4.74976332826339	2.03654850823703e-06
CCR1	0.921295986852328	-2.11383	0.0345294801573756
TTK	0.671975011521978	-8.6289	6.19430551589596e-18
TYROBP	1.21287814968338	3.63421589266224	0.000278827315601418
IL10RA	0.947412684755143	-0.834377	0.404068841681181
MPO	0.922238809107849	-1.8658	0.062069626372067
CD19	1.2994034590791	7.7663284826937	8.07938586345234e-15
CTSS	1.4470802106367	4.19986961719095	2.67068725664889e-05
TLR2	1.14067571615585	2.55182505794965	0.0107160310494806
CCL4	1.28977960791048	4.68824412929959	2.7555917319336e-06
IL1B	1.22701915543579	5.15446396116349	2.54357470435053e-07
ITGAM	0.916403346378103	-1.53462	0.124877001468563
IL6	1.02910170661553	0.796786309387169	0.425575147558426
CD163	0.897962718381387	-2.39752	0.0165064592994684
TGFB1	1.72243772421323	6.61317991292973	3.7615082787002e-11
TREM1	0.930494479261389	-1.65444	0.0980382702795051
ASPM	0.695661386735912	-9.25189	2.20565963886623e-20
Multivariate Cox analysis
Gene symbol	coef	HR	HR.95L	HR.95H	P.Value
IL18	0.128191812082586	1.13677102820477	1.02017651592326	1.26669096023667	0.0202461518745346
TLR1	-0.285985	0.751274010039424	0.646793252235828	0.872632230175037	0.000181695518643323
PRF1	-0.111971	0.894069856480037	0.805472362835185	0.992412583161216	0.0354647299777808
IL6R	-0.282489	0.753904680367741	0.66585014981146	0.853603873546209	8.27914608926722e-06
CCL2	0.118002493968357	1.12524691769405	1.0280064236141	1.23168551936527	0.0104988914290754
TTK	-0.13314	0.875342446522334	0.766527325981036	0.99960480561219	0.0493217012933121
CD19	0.240152117174465	1.27144254385906	1.15032664453177	1.40531052637906	2.57748333517092e-06
CTSS	0.415660301340403	1.51537101192587	1.15832388816972	1.98247599590968	0.00242871922036598
CCL4	0.173024109704366	1.18889476863989	1.04174184979528	1.35683400947851	0.0102709268294578

## Sheet: S6 Table 
Supplementary Table S6. Significant marker genes (adj.P.Val < 0.05) identified in 8 of 13 immune cell clusters in the ALL tumor microenvironment
P.Value	avg_log2FC	pct.1	pct.2	adj.P.Val	Cluster	Gene symbol
0	0.839822382962753	0.849	0.439	0	0	NASP
0	0.900075532499002	0.85	0.473	0	0	RANBP1
0	1.12874746749771	0.803	0.431	0	0	HSPD1
0	1.19177446452314	0.83	0.464	0	0	HSPE1
0	1.50014537988166	0.711	0.347	0	0	ITM2A
0	1.16719553434291	0.692	0.328	0	0	NME1
0	1.26019391769313	0.61	0.247	0	0	MCM5
0	1.59282882063166	0.53	0.174	0	0	TLX3
0	0.954885118266909	0.777	0.424	0	0	ATP5MC1
0	1.00404066216394	0.854	0.501	0	0	MT2A
0	1.10889503925041	0.673	0.328	0	0	SRM
0	1.12786591917495	0.582	0.246	0	0	IGFBP2
0	0.919932366539366	0.843	0.516	0	0	CALR
0	0.918617176744385	0.868	0.548	0	0	C1QBP
0	0.798263388949136	0.933	0.663	0	0	SNRPF
0	0.959596061219181	0.95	0.701	0	0	MIF
0	0.667869023049626	0.977	0.775	0	0	LDHB
0	0.867351884355342	0.989	0.817	0	0	ENO1
0	0.934048564037675	0.985	0.835	0	0	RPS26
0	0.839293504800142	0.989	0.849	0	0	HSP90AB1
0	0.838694869515777	0.995	0.883	0	0	NPM1
2.06715945507724e-303	0.944219917131569	0.791	0.446	4.20894336648277e-299	0	FABP5
4.65165569217393e-301	0.662107521252495	0.966	0.754	9.47123615483534e-297	0	TXN
1.00703759259071e-300	1.1259893948252	0.547	0.219	2.05042924227394e-296	0	MCM3
8.5101893401502e-299	1.31180309914516	0.511	0.204	1.73275965154798e-294	0	DCTPP1
2.13882490774679e-298	0.96633574684652	0.714	0.371	4.35486139466324e-294	0	COMT
9.33000645656941e-297	0.720776279610718	0.934	0.636	1.8996826146221e-292	0	RAN
1.14238078920282e-292	0.798638411835032	0.857	0.529	2.32600152489585e-288	0	PRDX1
1.67810383510295e-286	0.975106726826911	0.674	0.333	3.41678721865312e-282	0	CCT5
1.11004865131344e-283	0.757787336747363	0.867	0.563	2.2601700589393e-279	0	NDUFB2
3.16469718706607e-277	0.598693579497461	0.994	0.926	6.44363994258522e-273	0	ACTG1
4.29576742406687e-275	1.66667225041114	0.32	0.088	8.74661205214256e-271	0	UNG
6.75855336234638e-275	0.735174231419645	0.908	0.658	1.37610905010735e-270	0	PEBP1
6.56790962719611e-274	1.18166387282752	0.486	0.193	1.3372920791934e-269	0	MCM4
2.42820034998516e-272	2.58354258164078	0.308	0.087	4.94405873260479e-268	0	MT1G
4.10158821058374e-264	0.593257497558215	0.976	0.794	8.35124375556954e-260	0	NUCB2
1.01689189321798e-260	0.604241709784364	0.955	0.736	2.07049358378112e-256	0	UQCRH
7.68527711018829e-260	1.30740485450961	0.441	0.172	1.56479927240544e-255	0	FKBP4
1.08481926530848e-258	0.79475374275764	0.748	0.423	2.2088005060946e-254	0	PRMT1
3.74200449737291e-255	0.848797414431628	0.789	0.476	7.61909535710099e-251	0	DNTT
1.75665141925936e-252	0.802826529256939	0.759	0.436	3.57671795475399e-248	0	CCT7
5.34696027328533e-249	0.925908571098031	0.639	0.325	1.08869458124363e-244	0	PAICS
1.14346515946717e-247	0.888263492658254	0.644	0.322	2.3282094111911e-243	0	NDUFB3
5.50456125616725e-247	0.809954754488441	0.665	0.33	1.12078371736821e-242	0	CDCA7
1.992675746717e-246	0.757737872868056	0.794	0.474	4.05728708789048e-242	0	CCT3
1.2465372963996e-245	0.601543478746861	0.95	0.71	2.53807458919923e-241	0	SLC25A5
3.16832637506467e-241	1.40602191454823	0.628	0.329	6.45102933226918e-237	0	MT1X
3.86516436456985e-241	1.41838076128884	0.37	0.131	7.86986116270066e-237	0	MCM2
5.70562568334938e-240	0.76503296503932	0.751	0.412	1.16172244538677e-235	0	DYNLL1
1.45032100757646e-236	0.633791793485315	0.915	0.64	2.95299860352644e-232	0	SNRPE
6.26133446178916e-234	0.657055149323477	0.951	0.774	1.27487030976489e-229	0	NCL
8.14285669652476e-234	0.842496339058272	0.69	0.382	1.65796705197941e-229	0	EBPL
9.30774936620817e-233	0.7555570549359	0.774	0.461	1.89515084845365e-228	0	NHP2
3.67013943477847e-231	0.825565027737678	0.693	0.388	7.47277090315245e-227	0	NDUFAB1
3.64031252073188e-229	0.719810364186019	0.585	0.278	7.41204032346219e-225	0	HELLS
2.93577360067038e-228	0.593929397634946	0.948	0.724	5.97752862832496e-224	0	ATP5MC3
2.93374847791815e-227	1.11421005595957	0.457	0.193	5.97340527588914e-223	0	MCM6
8.21228791406047e-227	0.782480252418505	0.697	0.384	1.67210394218185e-222	0	ABRACL
4.21649082551361e-226	1.1149604701139	0.521	0.249	8.58519696982827e-222	0	PRDX4
1.27071005779774e-224	0.635173222244079	0.941	0.707	2.58729274868198e-220	0	LDHA
7.60793089194068e-224	0.661697191159026	0.796	0.472	1.54905080890804e-219	0	TALDO1
3.79114650278159e-222	0.729007704433673	0.822	0.553	7.71915339431359e-218	0	PPA1
1.83159267020144e-221	0.597604053553225	0.911	0.676	3.72930583579715e-217	0	TKT
3.25168305285031e-221	0.657592887191641	0.583	0.262	6.62075186390852e-217	0	PCNA
5.13285956965362e-221	1.41130127379844	0.351	0.125	1.04510153697717e-216	0	GINS2
7.4829489337213e-221	0.638254134240252	0.868	0.586	1.52360323239499e-216	0	TBCA
1.85465230052436e-220	0.633632050291769	0.918	0.677	3.77625754909764e-216	0	PSMA7
2.78688035080107e-220	0.620438949493591	0.931	0.678	5.67436708226607e-216	0	ATP5MF
5.0495483032858e-217	0.709842760788276	0.791	0.489	1.02813853003202e-212	0	OSTC
7.74677226109581e-217	0.588917816368347	0.928	0.674	1.57732030008172e-212	0	SERBP1
2.35405776104931e-216	0.658654455986911	0.787	0.477	4.7930970072725e-212	0	VDAC1
2.85681280611729e-216	0.762576910975876	0.633	0.317	5.81675655453541e-212	0	MCM7
2.04743783651926e-215	0.778387400719454	0.689	0.379	4.16878817893686e-211	0	PRKDC
2.35311992698378e-214	1.26496073915019	0.34	0.119	4.79118748333167e-210	0	NDFIP2
3.008281827735e-214	0.611491838041846	0.839	0.54	6.12516262945123e-210	0	POLR2L
6.82926859047421e-214	0.658187656782609	0.895	0.657	1.39050737770645e-209	0	HSPA8
3.30772159896532e-213	0.660076340094831	0.807	0.517	6.7348519476533e-209	0	NDUFA3
1.60347336035485e-212	0.600379329702179	0.903	0.638	3.26483210901851e-208	0	PARK7
1.8149728888071e-212	1.01418519270123	0.428	0.177	3.69546629890014e-208	0	RUVBL1
1.00505949027793e-211	0.666225480178117	0.788	0.456	2.04640162815488e-207	0	LSM4
2.35138650408466e-211	0.781708735390052	0.673	0.373	4.78765806096678e-207	0	MRPL11
6.13603815126641e-211	0.639175856505806	0.895	0.637	1.24935872797935e-206	0	NDUFB11
9.6509906718289e-211	0.72760614355368	0.732	0.433	1.96503821069108e-206	0	FKBP3
4.4825853037202e-209	0.749837824287705	0.652	0.345	9.12699193690469e-205	0	NOP56
5.70254675859592e-209	0.823679822853035	0.62	0.326	1.16109554551772e-204	0	SNHG19
5.76241432550024e-209	0.752688754406761	0.828	0.554	1.1732851808151e-204	0	PPIB
1.57063802318954e-207	0.962459566364136	0.566	0.285	3.19797607901623e-203	0	AHI1
3.28438972132601e-204	0.695310478936453	0.65	0.34	6.6873459115919e-200	0	DNMT1
1.02780671479133e-203	0.648177950335126	0.828	0.534	2.09271725198663e-199	0	COX5A
2.60306759127827e-203	1.03902299340394	0.451	0.2	5.30010592260168e-199	0	EBNA1BP2
6.53161749756678e-203	0.556570591657353	0.911	0.648	1.32990263867957e-198	0	UQCR10
8.74081681776792e-202	0.630818983563854	0.845	0.562	1.77971771226573e-197	0	CCT8
6.05075291208836e-201	0.69347093481676	0.79	0.489	1.23199380043031e-196	0	PKM
7.05979746518131e-200	0.689428063701812	0.745	0.44	1.43744536188557e-195	0	HNRNPAB
6.97822758897965e-198	0.754516188236165	0.645	0.358	1.42083691939215e-193	0	C4orf48
2.26242706690461e-197	0.624703428058468	0.745	0.441	4.60652775092448e-193	0	GADD45GIP1
6.01459694466972e-197	0.783327309946295	0.653	0.35	1.2246320839042e-192	0	CACYBP
1.07154924981185e-196	0.728419592436341	0.527	0.251	2.18178142754192e-192	0	ATP1B3
2.17334683455393e-196	1.8330668478422	0.324	0.12	4.42515148983525e-192	0	MT1E
5.64617403857869e-196	0.732589395489326	0.756	0.478	1.14961749599501e-191	0	PDCD5
7.70374018710678e-196	0.676227789858323	0.732	0.433	1.56855853949681e-191	0	PHB
1.26866771569261e-195	0.590116013089715	0.853	0.542	2.58313433592172e-191	0	TPI1
1.86339563413234e-195	0.536724741535022	0.849	0.546	3.79405985065686e-191	0	CD3E
1.26841807309267e-194	0.583397392719344	0.888	0.623	2.58262603862399e-190	0	TMEM258
6.43665481748416e-194	0.582368985111539	0.727	0.423	1.31056728738795e-189	0	MAT2A
1.87980510695556e-193	0.707177140306673	0.841	0.574	3.82747117827222e-189	0	RPL22L1
7.26651024875029e-193	0.993569718418847	0.503	0.246	1.47953415174805e-188	0	IFITM1
8.78269321787387e-193	0.575638046209664	0.917	0.694	1.7882441660913e-188	0	SNRPB
1.18880749079836e-192	0.554001764955831	0.892	0.603	2.42053093201455e-188	0	HMGA1
3.52259568791509e-192	0.514772445260188	0.947	0.749	7.17235708016391e-188	0	LSM7
3.16859108806857e-191	0.922570683428643	0.471	0.214	6.45156831441642e-187	0	CDK4
5.37268157528561e-191	0.566547683401356	0.87	0.58	1.0939316955439e-186	0	SIVA1
6.6821693458028e-190	0.935772472422221	0.477	0.222	1.36055650049891e-185	0	GGCT
7.28173598553701e-190	0.61567628762019	0.886	0.611	1.48263426401519e-185	0	SNRPD1
2.62827579493082e-189	0.553968109822223	0.888	0.587	5.35143234605865e-185	0	DUT
5.0325505581026e-189	0.680867474828587	0.744	0.447	1.02467761913527e-184	0	GSTO1
6.32586465110257e-189	-1.10768	0.796	0.823	1.28800930161099e-184	0	HLA-B
1.05684808874301e-188	0.741291860268808	0.629	0.345	2.15184839348964e-184	0	NME4
1.54449921599156e-188	0.650985296385058	0.788	0.486	3.14475485368041e-184	0	SNRPG
5.72052995047639e-187	0.70386597547057	0.644	0.358	1.1647571032165e-182	0	MRPS34
7.12112621192402e-187	0.876570635859257	0.477	0.222	1.44993250800985e-182	0	ATIC
9.17137533348417e-187	0.601016240620186	0.811	0.515	1.86738373165071e-182	0	TRMT112
3.58798263678673e-186	1.22475440026239	0.297	0.103	7.30549144676146e-182	0	NRXN2
4.31187806799836e-186	0.837777480136954	0.524	0.258	8.77941493425145e-182	0	TOMM40
8.35753031699053e-185	0.649108650448846	0.726	0.428	1.70167674784244e-180	0	IMPDH2
2.94393824503808e-184	1.07124918332235	0.359	0.143	5.99415266072204e-180	0	MRTO4
6.87217503509262e-184	0.623336674291072	0.724	0.418	1.39924355889521e-179	0	CLNS1A
1.29731276816593e-183	0.523079050290632	0.923	0.681	2.64145852726264e-179	0	ATP5PF
1.48847865862463e-183	0.71533634942562	0.65	0.364	3.03069139682561e-179	0	RPN2
7.05383381943205e-183	0.727025171366324	0.675	0.388	1.43623110397456e-178	0	PDIA6
1.15619438339243e-182	0.771110462794312	0.595	0.318	2.35412738402532e-178	0	POLD2
3.16399633806266e-182	0.608271496307689	0.838	0.564	6.44221294392938e-178	0	PA2G4
1.51635374527026e-180	1.03155808049246	0.375	0.155	3.08744786074478e-176	0	MTHFD1
1.70244182046628e-180	0.685823184082515	0.687	0.392	3.4663417906514e-176	0	STOML2
2.81547733055304e-180	0.718381131689305	0.558	0.282	5.73259339273905e-176	0	LAGE3
1.36581564983326e-179	1.00990025303814	0.363	0.146	2.7809372446255e-175	0	ISOC2
9.10539096332983e-179	0.528714053329897	0.919	0.697	1.85394865404359e-174	0	ATP5MD
1.12130972303877e-178	0.738828121404814	0.714	0.424	2.28309872707925e-174	0	SMS
6.40208901791934e-178	0.807471935933745	0.542	0.277	1.30352934493856e-173	0	NUDT5
1.16764208735727e-177	0.652769364087615	0.66	0.367	2.37743605406813e-173	0	SLIRP
4.54728943207742e-177	-1.21287	0.272	0.525	9.25873601265284e-173	0	ANXA1
4.61694724612417e-177	0.708917085485403	0.634	0.359	9.40056628783343e-173	0	COX14
4.58178418187301e-176	0.739287704708991	0.482	0.228	9.32897077271164e-172	0	MRPS26
2.47473031560304e-175	0.754796531057899	0.546	0.28	5.03879839559935e-171	0	TMEM147
1.45831416473427e-172	0.693084566163133	0.675	0.401	2.96927347081544e-168	0	NDUFAF8
3.47753837287462e-172	1.08236310383337	0.31	0.116	7.08061588101001e-168	0	EXOSC5
5.70165452074026e-170	0.662548749381103	0.547	0.28	1.16091387696792e-165	0	TIMM8B
2.62124485520759e-169	0.51378729792794	0.863	0.597	5.33711664968817e-165	0	PRDX5
3.63886934442306e-168	0.703557447067854	0.566	0.291	7.4091018721798e-164	0	HPRT1
6.69266804999586e-167	0.514511070138838	0.887	0.64	1.36269414165966e-162	0	CSTB
1.58344177249856e-166	0.73450745834054	0.558	0.295	3.22404579298433e-162	0	NDUFB6
2.95017251386357e-166	0.700163894075522	0.534	0.263	6.00684625547762e-162	0	RPA3
3.93357844054467e-166	0.7900667012527	0.476	0.234	8.009159062793e-162	0	AHSA1
6.46900417434492e-166	0.737065083175737	0.594	0.33	1.31715393993837e-161	0	SSR3
9.76364429736906e-166	0.857298449871102	0.427	0.197	1.98797561538731e-161	0	NOLC1
6.54023004958172e-165	0.599903174383964	0.689	0.398	1.33165624039533e-160	0	DAD1
1.72213655893899e-164	0.606659246498762	0.745	0.476	3.50644224765568e-160	0	THOC7
2.65748879647793e-164	0.653899967362183	0.629	0.351	5.41091293850871e-160	0	BCAP31
3.40012330200334e-164	0.561214149495743	0.84	0.562	6.922991055209e-160	0	SEM1
1.91609208649512e-162	0.96851724358315	0.327	0.13	3.90135509731272e-158	0	CD2
5.69002110872548e-162	0.515810700092431	0.893	0.608	1.1585451979476e-157	0	ERH
5.97256697506174e-162	0.580922422702455	0.623	0.333	1.21607436179232e-157	0	TMEM14C
7.54367781040607e-162	0.836058480837447	0.349	0.145	1.53596823897678e-157	0	LYAR
1.10273651757798e-161	1.04085126837116	0.323	0.128	2.24528182344052e-157	0	IFRD2
1.66081049844279e-161	0.634157537056751	0.592	0.314	3.38157625587936e-157	0	DNAJC9
3.27167522979064e-161	-1.29787	0.38	0.576	6.66145793537672e-157	0	HES4
8.62775972788862e-161	0.832927911300801	0.414	0.19	1.7566981581954e-156	0	NDUFA8
2.09969628147495e-160	0.542197966229149	0.846	0.6	4.27519159871115e-156	0	PGK1
3.77197188377563e-160	0.873910437542515	0.408	0.188	7.68011195255557e-156	0	PDHA1
5.39706363075116e-160	0.869333318673303	0.403	0.183	1.09889612585724e-155	0	CMSS1
8.11042156395585e-160	0.572734166812262	0.716	0.429	1.65136293463705e-155	0	ATP5PD
9.99955836638088e-159	0.588568641661194	0.623	0.357	2.03601007897881e-154	0	CCDC85B
2.13733726860582e-157	-0.752831	0.966	0.913	4.3518324126083e-153	0	HLA-A
2.95182658860269e-157	0.597248219657102	0.798	0.561	6.01021411705393e-153	0	RPS4Y1
7.26801588335959e-157	0.568848609345403	0.787	0.514	1.47984071401085e-152	0	NDUFC2
8.1566254939345e-157	0.609073651311404	0.738	0.477	1.66077051682e-152	0	SSB
1.00043520810435e-156	0.887596687824655	0.372	0.163	2.03698612722127e-152	0	DENND2D
5.16454991476075e-156	0.637795985279142	0.542	0.285	1.05155400814444e-151	0	POLR2F
6.36660743292599e-156	0.665766414383344	0.516	0.267	1.29630493941806e-151	0	DPM3
2.130824714131e-155	0.629495285531093	0.562	0.3	4.33857220044214e-151	0	ECHS1
3.4371871392275e-155	0.829298848545522	0.405	0.186	6.99845673418112e-151	0	COA4
4.49975619244643e-155	0.575477301673923	0.749	0.463	9.16195358344017e-151	0	PGAM1
7.92324145818575e-155	0.607649886023696	0.63	0.351	1.6132511933012e-150	0	NAA38
1.72729360705061e-154	0.76490890864866	0.5	0.255	3.51694251331575e-150	0	EIF1AY
4.0009783990081e-154	1.12549557289373	0.29	0.112	8.14639211822039e-150	0	SFXN4
3.65693111471244e-153	0.645554182005598	0.5	0.254	7.445877442666e-149	0	LARS
1.28299879642458e-152	0.511827579890223	0.84	0.595	2.61231384940009e-148	0	PPP1R14B
4.60663489478031e-152	0.553746947783743	0.726	0.438	9.37956930926219e-148	0	FDPS
5.73022484380963e-151	0.803053809788314	0.453	0.223	1.16673108044808e-146	0	AKR7A2
7.22652362190178e-151	0.517959783259286	0.765	0.488	1.47139247465542e-146	0	PRELID1
1.08248432622045e-150	0.759080194599482	0.475	0.241	2.20404633661747e-146	0	EIF4EBP1
1.32474524632084e-150	0.687961151082283	0.498	0.254	2.69731379603387e-146	0	CENPX
1.62158245567385e-149	0.600555623603184	0.725	0.459	3.30170403799753e-145	0	CANX
1.14639386117068e-148	0.541360145228618	0.796	0.541	2.33417254072962e-144	0	APEX1
4.70001958452863e-148	0.835768403407194	0.396	0.185	9.56970987605875e-144	0	BOLA3
4.70454632472369e-148	0.531193533698847	0.656	0.378	9.5789267717699e-144	0	ECH1
6.41463769934628e-148	-1.08648	0.781	0.811	1.3060843819639e-143	0	BTG1
7.88601088664678e-148	0.814350445050134	0.373	0.167	1.60567067663015e-143	0	CFAP298
9.44669572864352e-147	0.596300724153817	0.642	0.376	1.92344171730911e-142	0	ATXN10
1.93344330650383e-146	0.796949666289681	0.371	0.167	3.93668391637246e-142	0	IMMP1L
3.35698279574154e-146	0.798771895627428	0.436	0.215	6.83515267040934e-142	0	GAMT
6.48962264001597e-146	1.15591389783809	0.285	0.113	1.32135206573365e-141	0	COPRS
7.32655904265886e-146	0.559412670317632	0.67	0.404	1.49176068667577e-141	0	METTL26
1.39027659187647e-145	0.714483733778774	0.461	0.231	2.83074216871967e-141	0	METTL5
8.29485129336777e-145	1.0103031722681	0.414	0.205	1.68891467184261e-140	0	IGLL1
2.62544799340515e-144	0.692397984444651	0.445	0.218	5.34567465937223e-140	0	DPY30
7.64771993101511e-144	0.960106932420029	0.296	0.119	1.55715225515399e-139	0	MRPL24
8.268085259528e-144	0.851038101926194	0.375	0.172	1.6834648396925e-139	0	GCSH
1.43469341132563e-143	0.616977299078939	0.556	0.303	2.92117925480011e-139	0	TM7SF3
1.94690353856191e-143	0.873029696559754	0.418	0.205	3.9640902948659e-139	0	CENPH
5.02337761174709e-143	-0.592926	1	1	1.02280991552783e-138	0	MALAT1
1.6350444082468e-142	0.739107797536365	0.449	0.224	3.32911391963131e-138	0	AKR1B1
5.68386988753046e-142	0.523359218433701	0.806	0.533	1.15729274780008e-137	0	LSM3
5.90617751732983e-142	0.65809559029446	0.443	0.218	1.20255680430353e-137	0	AP005482.1
1.44650503003394e-141	0.512970731679526	0.614	0.347	2.9452288916521e-137	0	MRPS6
2.56398885780056e-141	0.714147395921495	0.482	0.246	5.22053771336772e-137	0	ALYREF
1.7198147447968e-140	0.869152222876139	0.32	0.135	3.50171480188076e-136	0	GPATCH4
1.90645633047052e-140	0.985499097634075	0.314	0.133	3.88173573447102e-136	0	RFC4
2.97096701634795e-140	0.546920742622665	0.687	0.417	6.04918594198606e-136	0	PHPT1
3.28509098303337e-140	0.623909972884224	0.502	0.264	6.68877375055424e-136	0	PSMG4
1.19307120328629e-139	0.6391651543181	0.552	0.306	2.42921227701121e-135	0	DNAJC19
5.20599329548494e-139	0.64636344282754	0.467	0.239	1.05999229489369e-134	0	GNL3
6.74509418102804e-139	0.547830754431554	0.68	0.414	1.37336862619912e-134	0	TOMM22
8.83119629056873e-139	0.607601	0.628	0.372	1.7981198767227e-134	0	NUTF2
1.4521710931188e-138	0.504095980261577	0.638	0.383	2.95676556269919e-134	0	CD63
1.6220050128844e-138	-1.63954	0.306	0.48	3.30256440673392e-134	0	EML4
4.18890674634755e-138	0.636861935581931	0.553	0.307	8.52903302623825e-134	0	KRTCAP2
1.16773075037583e-137	0.864243434964312	0.358	0.164	2.37761658084023e-133	0	SMIM4
1.40624271817512e-137	0.527886701486707	0.717	0.437	2.86325079847636e-133	0	MDH1
2.04739422562446e-137	0.709112828172792	0.491	0.257	4.16869938279396e-133	0	UHRF1
2.70554423131846e-137	0.673077915228199	0.421	0.206	5.50875860938753e-133	0	CCDC167
2.8422633146072e-137	0.535316271345094	0.724	0.456	5.78713233487172e-133	0	CCT2
4.49730255028078e-137	0.837955452440227	0.309	0.13	9.15695772262671e-133	0	TIMMDC1
1.58179315552611e-135	0.503028084652135	0.723	0.445	3.2206890439667e-131	0	PPM1G
2.5929640143616e-135	0.530850865771325	0.668	0.402	5.27953402964166e-131	0	MGST3
4.45948774866657e-135	0.601727626649717	0.471	0.234	9.07996300506001e-131	0	CENPU
1.16803408486017e-134	0.612272567465826	0.509	0.272	2.3782342001838e-130	0	UQCC2
2.55962736621344e-134	0.597242652841867	0.479	0.249	5.21165728034719e-130	0	ABCE1
1.17182372315013e-133	0.536443002596071	0.592	0.33	2.38595028270597e-129	0	HSPB11
1.97632989989088e-133	0.594333641849322	0.687	0.438	4.02400530916782e-129	0	SVIP
2.12007502815392e-133	0.700519433277913	0.45	0.234	4.31668476482419e-129	0	EPRS
2.92062647643663e-133	0.518475424740112	0.691	0.436	5.94668756867263e-129	0	EPHB6
4.26407692035395e-133	0.568528398348064	0.474	0.246	8.68208701753268e-129	0	PFDN6
4.69592957195101e-133	0.991709270212661	0.272	0.108	9.56138220144944e-129	0	E2F1
5.22522374150741e-133	0.552552	0.667	0.409	1.06390780600832e-128	0	GTF3C6
3.02367694477359e-132	0.604626690469079	0.65	0.407	6.1565086272535e-128	0	MAL
4.67041450164051e-132	0.666838196519108	0.459	0.238	9.50943096679024e-128	0	MRPS33
1.60768311461322e-131	0.790568899906221	0.388	0.19	3.27340358966397e-127	0	MRPL12
2.14666923435997e-131	0.659159220009002	0.499	0.269	4.37083322808033e-127	0	CHCHD3
3.05302259015497e-131	0.538521552398342	0.664	0.407	6.21625929581453e-127	0	ZSCAN16-AS1
3.88048263731512e-131	0.653936641153855	0.48	0.252	7.90105069783732e-127	0	SLBP
9.99703813740035e-131	0.566745388378904	0.561	0.316	2.03549693515609e-126	0	DKC1
5.00442137827941e-130	1.09773805249119	0.305	0.134	1.01895023683147e-125	0	RMI2
1.50455753678769e-129	0.513586931757781	0.636	0.375	3.06342960065341e-125	0	MINOS1
3.88213276859916e-129	0.811437828421634	0.38	0.185	7.90441053014476e-125	0	TRG-AS1
4.09519340231762e-129	0.545999749557159	0.63	0.373	8.33822328645891e-125	0	OLA1
5.99482023086777e-129	0.677040161768836	0.432	0.219	1.22060534720699e-124	0	MRPL3
1.20935425311414e-128	-1.12263	0.347	0.529	2.46236619476571e-124	0	CLEC2B
1.78339493596692e-128	0.838601149000771	0.339	0.155	3.63117042912225e-124	0	MAGOHB
3.1941190648903e-128	0.512275305855017	0.723	0.464	6.50354582802314e-124	0	CCT4
6.03553486197297e-128	0.723206598563867	0.432	0.222	1.22889525324632e-123	0	PPIH
1.36023664557457e-127	0.563887614907235	0.684	0.439	2.76957783405438e-123	0	SRI
1.95386415106606e-127	0.768304368681527	0.354	0.165	3.9782627979856e-123	0	EEF1E1
3.3517134040999e-127	-0.970098	0.735	0.742	6.8244236620878e-123	0	HLA-E
6.60051913423781e-127	0.563142727104062	0.494	0.266	1.34393170092216e-122	0	CYB5A
1.12282903205773e-126	0.736741719918903	0.344	0.159	2.28619219217275e-122	0	WDR18
1.16458384855641e-126	0.637178230029962	0.525	0.294	2.37120917404571e-122	0	UBE2M
1.57078491490569e-126	0.587794736526828	0.505	0.273	3.19827516523947e-122	0	PRDX3
1.71944330667866e-126	0.771067561668232	0.341	0.156	3.50095851672843e-122	0	HPF1
2.95700681397103e-126	0.517203285317308	0.684	0.423	6.02076157392641e-122	0	CCT6A
3.58327337405398e-126	0.876549588417991	0.305	0.133	7.29590291691131e-122	0	BOP1
3.95484918522859e-126	0.514426554910524	0.683	0.411	8.05246842604394e-122	0	LSM2
1.28116029081844e-125	0.535226638042086	0.534	0.297	2.60857046813543e-121	0	FKBP2
2.23875190233653e-125	0.564955604901276	0.541	0.3	4.55832274834741e-121	0	UBA2
2.52757399652234e-125	0.798627334977135	0.367	0.177	5.14639341431913e-121	0	RPA2
3.26918811310545e-125	0.625080373123599	0.417	0.211	6.656393917094e-121	0	MSRB2
6.21085216266042e-125	0.613955499005117	0.478	0.253	1.26459160883929e-120	0	C19orf48
1.85571918883986e-124	0.606178363552962	0.469	0.25	3.77842984039685e-120	0	CDC26
2.54501535905347e-124	0.796543083032703	0.316	0.141	5.18190577256876e-120	0	SLC27A5
5.04455504656351e-124	0.63038728724714	0.419	0.213	1.0271218530308e-119	0	TRMT1
5.37533408387019e-124	0.768314750074919	0.359	0.172	1.09447177281681e-119	0	EIF2S1
6.68866694282772e-123	0.65996549766591	0.46	0.246	1.36187947622915e-118	0	POLR2H
8.60299865721185e-123	0.698783223187782	0.434	0.224	1.75165655659491e-118	0	MRPL18
1.14098985101746e-122	0.599466045316244	0.531	0.299	2.32316943565666e-118	0	TSPAN7
3.76961982080339e-122	0.505764724408791	0.528	0.294	7.67532291713778e-118	0	NDUFB5
7.01936093993901e-122	0.522012317020844	0.513	0.282	1.42921208098098e-117	0	NDUFAF3
9.33973358976125e-122	-1.28191	0.333	0.512	1.90166315621129e-117	0	IFI44L
1.21363960351076e-121	0.87672606679289	0.275	0.116	2.47109159670827e-117	0	FLT3
1.29709895679233e-121	0.613273428282115	0.425	0.219	2.64102318592486e-117	0	MRPL1
3.06566026778658e-121	0.98309562675112	0.278	0.119	6.24199087124025e-117	0	GPX7
1.30552168328406e-120	0.505995911211643	0.606	0.361	2.65817269933467e-116	0	MLEC
2.6335043600552e-120	0.942782806322516	0.706	0.496	5.36207822750839e-116	0	SCGB3A1
1.22997432559741e-118	0.707343283847124	0.401	0.205	2.50435072434889e-114	0	MRPS23
1.79154194884639e-118	0.640828806618429	0.498	0.276	3.64775856204614e-114	0	EBP
3.31444645034446e-118	0.601823150694613	0.518	0.292	6.74854441754635e-114	0	ITGB1BP1
4.64628206166394e-118	0.81867835653019	0.3	0.134	9.46029490575395e-114	0	SDHAF3
6.33772998014597e-118	0.525681319310322	0.645	0.398	1.29042520125752e-113	0	BAG1
1.24876546016399e-117	0.55184538267464	0.572	0.339	2.54261135343989e-113	0	PDCD2
2.28498754400797e-117	0.813107259874122	0.31	0.141	4.65246313835463e-113	0	FARSA
2.29210400787438e-117	0.798950078358908	0.313	0.142	4.66695297043303e-113	0	UGT3A2
2.52798917073977e-117	0.533360479350921	0.553	0.32	5.14723875054325e-113	0	DDOST
2.72321646669865e-117	0.50362718536487	0.661	0.398	5.54474104784513e-113	0	CLTA
7.91109442277733e-117	-1.31979	0.347	0.492	1.61077793542169e-112	0	CDKN2D
3.19240910529598e-116	0.525661946483896	0.579	0.339	6.50006417929314e-112	0	MRPL20
4.05664021652207e-116	0.643946127451666	0.39	0.198	8.25972514486059e-112	0	GPI
7.14526288397261e-116	0.751218700897444	0.321	0.148	1.45484697580566e-111	0	C20orf27
1.28574017574673e-115	0.702580941517636	0.372	0.186	2.61789557183792e-111	0	PYCR2
1.39991069445998e-115	0.60252009100403	0.368	0.181	2.85035816498997e-111	0	AC010642.2
2.7522132010954e-115	0.761453020356737	0.301	0.135	5.60378129875034e-111	0	CHCHD10
6.4436305490332e-115	0.637093494174486	0.395	0.202	1.31198761608865e-110	0	FAM162A
2.29133346755583e-114	0.718516117595307	0.35	0.167	4.66538407329044e-110	0	RFC2
3.7569146503282e-114	0.758157124002448	0.359	0.176	7.64945391953325e-110	0	PRSS21
4.49216394414792e-114	0.687367313485047	0.406	0.209	9.14649500667958e-110	0	MCUR1
4.93281850622303e-114	0.531206128783241	0.346	0.164	1.00437117605207e-109	0	REXO2
5.11319786792896e-114	0.614150493343569	0.414	0.215	1.04109821788902e-109	0	AK2
8.70139358255085e-114	-0.644007	0.295	0.539	1.77169074734318e-109	0	IFI27
1.35238699352754e-113	0.521093264127724	0.524	0.294	2.75359515752142e-109	0	LSM6
1.58088005714605e-113	0.758707657576116	0.385	0.197	3.21882988435508e-109	0	TMEM109
1.85796752965113e-113	0.597335405278882	0.462	0.251	3.78300768712266e-109	0	AHCY
8.01310130570316e-113	0.509325969663069	0.624	0.381	1.63154755685422e-108	0	SNRPA
1.09734078621625e-112	0.549769907721254	0.448	0.237	2.2342955748149e-108	0	SAMD1
3.09919012391893e-112	0.619794425872506	0.431	0.232	6.31026101131133e-108	0	MANF
4.25255587753463e-112	0.642783976732791	0.368	0.184	8.65862902224827e-108	0	ADK
6.66292964250015e-112	-0.597894	0.933	0.878	1.35663910450945e-107	0	RBM39
7.31016278530275e-112	0.590314474457513	0.436	0.232	1.48842224471549e-107	0	NAA20
7.83942570916113e-112	0.651319541294014	0.437	0.236	1.5961854686423e-107	0	CHCHD1
1.05269340584451e-111	0.506162007728129	0.537	0.309	2.14338904364001e-107	0	BZW2
5.62035048073118e-111	0.617984910667738	0.37	0.185	1.14435956138167e-106	0	DHRS4L2
2.57123988219055e-110	0.513586421700276	0.438	0.233	5.23530152412818e-106	0	UBE2V2
5.01311755464873e-110	0.703257417553736	0.336	0.162	1.02072086530203e-105	0	SNRNP25
7.51039360067201e-110	0.708372660760488	0.325	0.155	1.52919124103283e-105	0	ANXA4
9.63514376156587e-110	0.537429082239941	0.548	0.319	1.96181162129243e-105	0	PCMT1
3.29703170091491e-109	0.510319878354224	0.511	0.293	6.71308624623285e-105	0	SND1
5.78525168392969e-109	0.838432427970463	0.35	0.176	1.17793509536492e-104	0	ACAT2
9.401559784354e-109	0.921504012159653	0.252	0.107	1.91425158769232e-104	0	ATAD3A
1.64743636349731e-108	0.534777668072893	0.453	0.248	3.35434517971687e-104	0	ATP1A1
1.91016327432023e-107	0.504585763746353	0.516	0.297	3.88928344284343e-103	0	MRPL4
3.32072461460041e-107	1.02094090072644	0.264	0.117	6.7613273877879e-103	0	POLR3K
8.01083590360682e-107	0.72890767945395	0.351	0.176	1.63108629833339e-102	0	VKORC1
1.41236513842036e-106	0.575610373638101	0.381	0.196	2.87571665833769e-102	0	POP5
1.76620030318743e-106	0.66903431535403	0.389	0.203	3.59616043731992e-102	0	MSH6
1.91946274836137e-105	0.562988342615116	0.299	0.138	3.90821810193858e-101	0	TSEN54
2.40579930970434e-104	0.50588430127995	0.807	0.582	4.89844797448901e-100	0	HSP90B1
2.41798214548728e-104	0.610753421086397	0.364	0.185	4.92325344642666e-100	0	NIT2
4.06100338670232e-104	0.581585965850563	0.358	0.18	8.2686089956646e-100	0	PDCL3
1.9739577527971e-103	0.514916755142981	0.451	0.248	4.01917538047017e-99	0	PGP
2.74439429861523e-103	-1.18478	0.327	0.486	5.58786123141046e-99	0	CD69
1.33214672303632e-102	0.573093507051806	0.463	0.264	2.71238394277426e-98	0	DHRS7
5.38031613421452e-102	0.818708047262567	0.28	0.13	1.09548616808742e-97	0	FH
7.45008812376611e-102	0.529557055425711	0.509	0.298	1.51691244288002e-97	0	PTRHD1
1.23165611418945e-101	-1.36786	0.216	0.381	2.50777501410114e-97	0	TLE4
4.76777087560476e-101	0.587820079053786	0.372	0.193	9.70765827981884e-97	0	TFDP1
9.25114616561518e-101	0.629177373980466	0.329	0.162	1.88362587078091e-96	0	GART
1.05462595419157e-100	0.518862318002099	0.45	0.25	2.14732390532945e-96	0	RPIA
1.84015397487945e-100	0.632045517459228	0.4	0.216	3.74673750825206e-96	0	IMP3
3.39123502762299e-100	0.684308956900236	0.384	0.204	6.90489363974316e-96	0	CHEK1
3.93290381081692e-100	0.70950134072613	0.291	0.136	8.00778544920433e-96	0	TPD52
6.18177230012422e-100	0.553291091409751	0.59	0.383	1.25867065802829e-95	0	ANXA2
3.49540837828349e-99	0.534523731698588	0.431	0.238	7.11700099902302e-95	0	C19orf24
5.62390720918934e-99	0.527214198262406	0.435	0.24	1.14508374686304e-94	0	RUVBL2
6.03052296065166e-99	-0.945534	0.764	0.755	1.22787478001829e-94	0	MDM4
6.55828621604369e-99	0.561505669138514	0.398	0.212	1.33533265644866e-94	0	RRP1B
1.14265525244545e-98	0.649412716363379	0.314	0.152	2.32656035950418e-94	0	DNPH1
2.07316138462475e-98	0.597583624560204	0.392	0.211	4.22116389523446e-94	0	SEC11C
3.0059551155128e-98	0.603557647250109	0.403	0.218	6.12042521069561e-94	0	ARPC1A
5.75387476057366e-98	0.758896748384326	0.306	0.149	1.1715464400004e-93	0	FAM213A
5.81116191099911e-98	0.810182416997458	0.262	0.119	1.18321067669853e-93	0	ALG3
1.19774853741251e-97	0.680994134769294	0.344	0.176	2.43873579702562e-93	0	COA6
2.23670451382283e-97	0.634143407718762	0.349	0.179	4.55415406059466e-93	0	PPID
2.40542193681338e-97	0.6956292892154	0.336	0.171	4.89767960554573e-93	0	CDK2AP2
4.78185458835024e-97	-0.831763	0.772	0.769	9.73633412733992e-93	0	CCNL1
2.52853746616705e-96	0.723383763850555	0.314	0.157	5.14835513486273e-92	0	ACTL6A
3.80349015172782e-96	0.582147243796813	0.363	0.19	7.74428629793302e-92	0	RBFA
6.7524704283582e-96	0.651223488147648	0.332	0.169	1.37487050391801e-91	0	SDF2L1
1.03578977517183e-95	0.515027610537016	0.383	0.203	2.10897156122735e-91	0	MFNG
2.37350918680914e-95	0.569236512391637	0.327	0.164	4.8327020552621e-91	0	RBM28
7.49165860122688e-95	0.792419863670957	0.25	0.112	1.5253766077958e-90	0	NDUFAF2
8.56132925784515e-95	0.591616630439724	0.326	0.163	1.74317225018985e-90	0	NPM3
3.85434182328406e-94	0.795838544609362	0.336	0.176	7.84782538638867e-90	0	PRPS2
4.0112509695058e-94	0.638867473606924	0.301	0.147	8.16730809901075e-90	0	EPB41L2
2.66417759367907e-93	0.657871874759327	0.328	0.168	5.42453199848996e-89	0	COA3
5.26305678292917e-93	-1.58662	0.225	0.37	1.07161099157221e-88	0	TNFAIP2
6.27292759885052e-93	0.617293007183106	0.304	0.15	1.27723078840195e-88	0	ARMC10
6.89771303448448e-93	0.628016111474535	0.319	0.161	1.40444335095139e-88	0	ARL6IP6
3.31660408643824e-92	-1.52962	0.162	0.316	6.7529375803969e-88	0	RHOU
5.49703674742545e-92	0.576521378051875	0.367	0.196	1.1192516521433e-87	0	ERI3
1.18328760258355e-91	0.659628275040459	0.347	0.182	2.40929188762036e-87	0	TCTEX1D2
1.67329603140111e-91	0.710783514450533	0.325	0.167	3.40699804953579e-87	0	HACD1
1.70458835346744e-91	0.570292815556709	0.382	0.206	3.47071234649505e-87	0	GAR1
7.38942301662542e-91	0.616163809888071	0.252	0.115	1.5045604204151e-86	0	HMOX2
9.21408495418064e-91	0.546656625523957	0.431	0.244	1.87607983752072e-86	0	GMPS
1.19852077925203e-90	0.580626787783685	0.316	0.16	2.44030815863505e-86	0	CMTM7
1.36790830374891e-90	-0.771257	0.689	0.728	2.78519809726315e-86	0	ARL4C
1.49649816037771e-89	0.563620661015326	0.326	0.168	3.04701990434505e-85	0	HDGFL2
4.70962455511929e-89	0.510524141682626	0.392	0.217	9.58926655667839e-85	0	NAXE
7.20044410849142e-89	0.664092382592193	0.321	0.165	1.46608242492994e-84	0	TNFRSF4
1.1801129171302e-88	0.573119370195105	0.394	0.218	2.40282791056879e-84	0	STIP1
1.85973809401868e-88	0.504697611525806	0.419	0.237	3.78661273323143e-84	0	SF3A3
2.07143340552943e-88	0.663169101266313	0.29	0.143	4.21764555699848e-84	0	SNHG10
8.67824872142536e-88	0.682748041111189	0.288	0.144	1.76697822216942e-83	0	MPHOSPH6
2.15472084193842e-87	0.630850412155998	0.365	0.201	4.38722710627081e-83	0	MRPL36
3.37915468069529e-87	0.581758864807841	0.326	0.171	6.88029684536368e-83	0	TEX264
3.67522329294149e-87	0.531991767414687	0.361	0.195	7.48312214675817e-83	0	AHCYL1
1.13766833965051e-86	0.788811572336947	0.282	0.14	2.31640650636241e-82	0	NUDT2
1.34063880196939e-86	0.649072801112728	0.293	0.147	2.72967466468987e-82	0	SCN2A
1.84320358278041e-85	0.724950182046042	0.268	0.131	3.75294681489919e-81	0	HSPH1
4.22996113787333e-85	0.646094314268242	0.291	0.146	8.61262387282388e-81	0	NOP14
4.24610082559127e-85	0.511103336818551	0.361	0.195	8.64548589098638e-81	0	TMX1
5.57166004423321e-85	0.549484977087246	0.308	0.157	1.13444570160632e-80	0	STN1
7.76606102513636e-85	0.571453447066003	0.282	0.139	1.58124768532801e-80	0	WDR46
8.05775506434019e-85	0.595897701310148	0.381	0.212	1.64063950865031e-80	0	PXMP2
2.63681814244827e-84	0.595546683999123	0.286	0.142	5.36882541983893e-80	0	FLYWCH2
8.81733198986296e-84	0.548675144474201	0.362	0.198	1.795296966456e-79	0	NANS
1.0744576929594e-83	0.598554635831531	0.355	0.194	2.18770330863463e-79	0	ERG28
3.12271197344629e-83	0.537729604733055	0.372	0.208	6.35815384913399e-79	0	NIFK
8.02136644127284e-83	0.650496920956551	0.295	0.151	1.63323042110756e-78	0	MRPS2
2.34620965552037e-82	-0.894566	0.414	0.537	4.77711747960502e-78	0	GYPC
3.26937783681686e-81	0.600845840530341	0.309	0.163	6.6567802135428e-77	0	CISD3
3.31446573296589e-81	0.677471130986185	0.26	0.127	6.74858367889185e-77	0	EMG1
7.00990173137723e-81	0.58200065236836	0.318	0.168	1.42728609152572e-76	0	BRIX1
7.02927954651137e-81	-0.562203	0.982	0.93	1.43123160846518e-76	0	UBC
7.380906596276e-81	0.648507969457711	0.329	0.176	1.50282639206776e-76	0	CHAF1A
2.80457883236056e-80	0.550313436389376	0.341	0.184	5.71040296056933e-76	0	PSMB5
5.02452081221209e-80	0.581466407828895	0.307	0.16	1.0230426825745e-75	0	EXOSC7
5.67228531762972e-79	-1.13963	0.499	0.563	1.15493401352259e-74	0	RICTOR
6.36984746154433e-79	-1.53817	0.215	0.348	1.29696464164504e-74	0	TNFAIP3
1.51917801456168e-78	0.52071294671073	0.463	0.282	3.09319835544903e-74	0	TOMM5
1.60473403120628e-78	0.629801391969038	0.307	0.162	3.26739896093911e-74	0	C11orf1
1.90738982997885e-78	0.522049240943553	0.295	0.152	3.88363643281994e-74	0	MRPS27
2.76249259687165e-78	0.599602702150323	0.296	0.154	5.62471117649036e-74	0	CHID1
8.53010341140562e-78	0.706608768059013	0.277	0.142	1.7368143555963e-73	0	FADS2
1.51205905403489e-76	0.599258146571972	0.288	0.15	3.07870343992044e-72	0	PLGRKT
3.93759926709844e-76	0.500327015858316	0.385	0.221	8.01734586773914e-72	0	AP1S1
1.00369968841761e-75	0.522289877682052	0.38	0.216	2.0436329355871e-71	0	YEATS4
2.04285296220821e-75	0.641868879362885	0.278	0.145	4.15945291635213e-71	0	MMAB
2.44482420496656e-75	0.554729163179685	0.301	0.159	4.97790656373241e-71	0	AK6
2.83110538765332e-75	-0.874718	0.596	0.637	5.76441367980092e-71	0	PNRC1
5.65547639846372e-75	0.559412927845659	0.297	0.157	1.1515115494912e-70	0	UTP18
1.79615766057836e-74	0.523356605426564	0.347	0.194	3.65715661270359e-70	0	HYI
1.40458582512725e-73	0.627213350565558	0.298	0.159	2.8598771985416e-69	0	HRH2
7.2398778326864e-73	-1.46335	0.242	0.362	1.47411152551328e-68	0	ARID5A
3.09200642675698e-72	0.511136681944549	0.307	0.166	6.29563428551989e-68	0	METTL23
1.33126896899634e-71	0.535419303229846	0.297	0.158	2.71059674777344e-67	0	FEN1
1.5696829196836e-71	0.573966511075398	0.253	0.128	3.19603139276779e-67	0	RCAN3
5.95456382570668e-71	0.546114885644435	0.308	0.169	1.21240874055214e-66	0	CENPV
7.73744477693651e-71	0.506156218153411	0.28	0.148	1.57542113103204e-66	0	ENOPH1
1.11351436082358e-70	0.562305867682684	0.278	0.147	2.2672265900729e-66	0	MSH2
8.4972401532023e-70	0.59517867523004	0.348	0.2	1.73012306759352e-65	0	MT1F
1.86374742655731e-69	-0.589396	0.932	0.853	3.79477613521334e-65	0	HLA-C
5.15624449681356e-69	0.513924012145553	0.304	0.164	1.04986294199621e-64	0	SNHG21
1.58571494530813e-68	0.518848040116886	0.303	0.167	3.22867420014188e-64	0	MRPS18B
2.84597569897149e-68	0.530864992436053	0.32	0.18	5.79469112067585e-64	0	POP7
5.41307899051103e-68	-1.31784	0.308	0.41	1.10215701325795e-63	0	CYTH1
5.78012409081071e-68	0.575433739895916	0.279	0.15	1.17689106612997e-63	0	PLPBP
2.48499050031909e-66	0.511042780835764	0.295	0.163	5.0596891576997e-62	0	THOC3
1.20616732995135e-65	0.514090431078846	0.322	0.181	2.45587730051395e-61	0	TMEM238
4.25991475217697e-65	-1.06886	0.523	0.564	8.67361242690752e-61	0	TASP1
7.61563388267685e-65	0.526845737726177	0.29	0.159	1.55061921485183e-60	0	VEGFB
7.6294942615885e-65	0.533175241576902	0.26	0.137	1.55344132660203e-60	0	PM20D2
2.39363993586719e-64	-1.00985	0.653	0.654	4.87369027341919e-60	0	ANKRD12
2.9991277094036e-64	-0.720472	0.282	0.437	6.10652392911666e-60	0	TRBC1
5.65951584797128e-64	-1.41796	0.14	0.261	1.15233402180543e-59	0	CYSLTR2
1.49292316541018e-63	-0.597664	0.842	0.837	3.03974085709166e-59	0	KLF6
5.85524493330993e-63	0.500510785543115	0.275	0.149	1.19218642087123e-58	0	PTPMT1
4.46092017948503e-62	0.519444326925406	0.262	0.141	9.08287957744948e-58	0	LINC02001
9.1150655744847e-62	0.5024784541183	0.286	0.16	1.85591850162083e-57	0	S1PR4
1.55630199492916e-61	-0.900182	0.526	0.579	3.16878649187527e-57	0	MIR181A1HG
1.30546512302455e-60	-0.65742	0.767	0.742	2.65805753699028e-56	0	KMT2E
1.32100205934622e-60	-1.62462	0.155	0.266	2.68969229303484e-56	0	PTPRE
2.8483612561922e-60	-1.45574	0.236	0.34	5.79954835373293e-56	0	ENTPD4
2.62376724891871e-57	-1.08422	0.42	0.495	5.34225249552339e-53	0	PGM2L1
1.13075460974954e-56	-0.645264	0.64	0.671	2.30232946091103e-52	0	YBX3
1.95201782651543e-56	-0.917838	0.59	0.598	3.97450349656807e-52	0	AAK1
6.46887746767317e-56	-1.24556	0.261	0.364	1.31712814119293e-51	0	ISG20
7.34243811214029e-56	0.549624681168292	0.269	0.152	1.49499382401288e-51	0	ACOT7
4.27828015524561e-55	-0.912455	0.554	0.584	8.71100622409558e-51	0	CD82
5.00077976308927e-55	-1.29066	0.201	0.308	1.01820876756261e-50	0	HES1
5.1153923047394e-55	-0.84974	0.602	0.615	1.04154502716799e-50	0	LIMD2
3.00159567630403e-54	-0.63749	0.81	0.761	6.11154895652263e-50	0	LRRFIP1
4.60955985926395e-54	-1.34695	0.236	0.337	9.38552482944732e-50	0	ATP2B1
6.33084243095504e-53	-0.742448	0.722	0.698	1.28902282736676e-48	0	ARID4B
7.06094338825099e-52	-0.532939	0.886	0.645	1.43767868328178e-47	0	HMGB2
2.60608269817544e-51	-1.13927	0.422	0.482	5.306244981755e-47	0	PPP2R5C
6.67989463122375e-51	-1.24407	0.18	0.284	1.36009334586347e-46	0	IRF9
7.78079075168126e-51	-1.33472	0.275	0.365	1.58424680494982e-46	0	LRMP
9.61092963237948e-51	-1.15414	0.149	0.261	1.95688138244879e-46	0	XIST
1.41264190526988e-50	-0.70217	0.481	0.554	2.87628018332e-46	0	CLEC11A
5.28669734104973e-49	-1.55674	0.254	0.345	1.07642444561114e-44	0	NFKBIA
8.51220338561186e-49	-0.66941	0.88	0.831	1.73316973134443e-44	0	NKTR
8.82334790894547e-49	-1.17454	0.254	0.351	1.79652186774039e-44	0	BTG2
1.18333573986784e-48	-1.23606	0.225	0.32	2.4093898999449e-44	0	RYBP
9.96580621168875e-47	-0.81673	0.628	0.627	2.02913780276195e-42	0	MAP4K4
6.52476177759571e-46	-0.928302	0.462	0.509	1.32850674553626e-41	0	LZTFL1
7.23701333093418e-46	-1.23847	0.175	0.272	1.47352828431151e-41	0	KCTD9
6.3722921965442e-45	-0.961054	0.328	0.41	1.29746241413837e-40	0	SYNJ2
2.68583131354921e-44	-0.717587	0.4	0.487	5.46862113751755e-40	0	MX1
3.07806610219342e-44	-0.504724	0.579	0.383	6.26725039067601e-40	0	CD52
4.32822500049401e-43	-0.56	0.842	0.786	8.81269892350585e-39	0	MBNL1
4.70538040724505e-43	-1.26433	0.294	0.368	9.58062504719164e-39	0	WHAMM
6.10376756461054e-43	-0.769545	0.489	0.527	1.24278811383035e-38	0	UBALD2
1.57200865016457e-42	-1.00585	0.481	0.513	3.20076681260008e-38	0	REL
5.90915030606637e-42	-0.847755	0.645	0.626	1.20316209381817e-37	0	CASP8
7.15690967893439e-42	-0.651471	0.75	0.701	1.45721837972783e-37	0	GALNT2
2.74763770818916e-41	-0.998704	0.439	0.482	5.59446513764395e-37	0	KLF13
7.1933696257203e-41	-1.07299	0.469	0.502	1.46464198949291e-36	0	KMT2C
8.62570733729769e-41	-0.886763	0.435	0.49	1.75628027094718e-36	0	ADGRE5
1.220127768834e-40	-1.07617	0.235	0.329	2.48430215012292e-36	0	IL7R
3.17730482912406e-40	-1.10591	0.344	0.407	6.46931036257951e-36	0	CYLD
3.64111221931003e-40	-1.19316	0.267	0.342	7.41366858973716e-36	0	KLF3
1.88428863371139e-39	-0.60105	0.862	0.816	3.83660008709975e-35	0	JUN
2.57018444710617e-39	-0.792637	0.548	0.567	5.23315255275287e-35	0	TMEM123
1.54148658853582e-38	-0.775675	0.467	0.518	3.13862084291779e-34	0	DDIT4
1.69447451408701e-38	-0.704389	0.725	0.716	3.45011955813257e-34	0	SAT1
3.79650844906627e-38	-1.09783	0.319	0.389	7.73007085314383e-34	0	IRF1
1.95375654082582e-37	-0.986795	0.382	0.435	3.97804369277545e-33	0	IFI44
2.47815670585383e-37	-0.59216	0.877	0.79	5.04577486878898e-33	0	RTN4
3.20783070594341e-37	-1.04198	0.384	0.429	6.53146410037138e-33	0	MXD4
5.32984151157068e-37	-1.00781	0.359	0.418	1.08520903017091e-32	0	TACC1
5.82360672931881e-37	-1.22981	0.217	0.298	1.1857445661566e-32	0	PGAP1
3.3046324658275e-36	-0.684519	0.721	0.674	6.72856216367137e-32	0	ARID1B
3.55473283599725e-36	-0.79281	0.825	0.717	7.23779152737401e-32	0	MTRNR2L12
6.60741346410451e-36	-0.905353	0.171	0.265	1.34533545542632e-31	0	TRGC1
3.37524677803725e-35	-0.773415	0.528	0.558	6.87233996476165e-31	0	SH2D1A
1.02554809929239e-34	-1.06502	0.39	0.446	2.08811848496923e-30	0	CXCR4
1.31053259037415e-34	-0.71912	0.636	0.617	2.6683754072608e-30	0	ZNF326
1.54281307012028e-34	-0.602281	0.773	0.712	3.14132169207191e-30	0	IKZF1
2.42720373086931e-34	-1.17782	0.266	0.336	4.94202951642301e-30	0	ZBTB43
2.79822802533163e-34	-0.945443	0.417	0.454	5.69747208237774e-30	0	BAZ2A
7.84521309613719e-34	-0.601097	0.68	0.652	1.59736383850449e-29	0	RSRC2
2.0428874036768e-33	-0.648393	0.663	0.638	4.15952304262634e-29	0	DDX6
2.11866150159593e-33	-0.651406	0.663	0.64	4.31380668339948e-29	0	ADAR
2.50405275135165e-33	-0.775289	0.671	0.652	5.0985018070271e-29	0	TSC22D3
2.68855690009789e-33	0.858503190759767	0.467	0.368	5.47417070428931e-29	0	LGALS1
4.06505964501113e-33	-0.809487	0.613	0.603	8.27686794320716e-29	0	OGA
7.301678637215e-33	-1.26774	0.196	0.268	1.48669478732335e-28	0	IRGQ
8.43877826361118e-33	-0.843181	0.37	0.43	1.71821964225387e-28	0	STAT1
1.04428683424081e-32	-1.13331	0.255	0.323	2.12627242319772e-28	0	MIDN
1.3895556332643e-32	-0.890931	0.54	0.546	2.82927422488944e-28	0	CHD1
3.5570082157483e-32	-0.932384	0.423	0.463	7.24242442808511e-28	0	PPP1R15A
4.6717844841405e-32	-0.671173	0.627	0.617	9.51222038815846e-28	0	VAMP2
5.00048489887103e-32	-0.920221	0.571	0.565	1.01814873025913e-27	0	RB1CC1
2.58339655333517e-31	-1.06025	0.2	0.278	5.26005372224574e-27	0	HOXA9
9.85918533956502e-31	-0.767784	0.457	0.499	2.00742872698883e-26	0	MYO7B
1.35706210019941e-30	-1.18766	0.191	0.26	2.76311414221602e-26	0	FAM107B
2.67831571709978e-30	-0.762995	0.714	0.665	5.45331863158687e-26	0	ZNF292
1.48905728118319e-29	-0.98252	0.342	0.393	3.0318695302171e-25	0	KLHL24
2.5743935616536e-29	-1.18552	0.206	0.273	5.2417227308829e-25	0	OPTN
3.60525853721713e-29	-1.04139	0.204	0.273	7.3406669076278e-25	0	RGS9
6.07973125262958e-29	-0.739732	0.502	0.516	1.23789408034791e-24	0	SSH2
6.36464438037669e-29	-1.18854	0.269	0.33	1.2959052422885e-24	0	ARHGEF7
9.15951149403165e-28	-1.14882	0.328	0.374	1.86496813529978e-23	0	CD44
1.96931071430122e-27	-0.749714	0.469	0.49	4.00971354538872e-23	0	YPEL5
2.10661001556793e-27	-0.885072	0.418	0.45	4.28926865269786e-23	0	SECISBP2
2.88676076628234e-27	-1.11406	0.217	0.28	5.87773359622746e-23	0	BIRC2
3.93263690469177e-27	-0.841526	0.484	0.499	8.00724200164291e-23	0	ERICH1
4.66680651420676e-27	-0.671274	0.623	0.598	9.50208474357637e-23	0	USP15
1.23672229421326e-26	-0.97625	0.395	0.428	2.51809026324762e-22	0	MCL1
1.33716464449297e-26	-0.731418	0.688	0.638	2.72260093265214e-22	0	PSAP
1.80033482475131e-26	-0.782844	0.245	0.314	3.66566173667614e-22	0	EPSTI1
[truncated: 13,199 more rows]
