# Supplementary material for: Immune dysregulation and prognostic signatures associated with Epstein–Barr virus in acute lymphoblastic leukemia: an integrated transcriptomic and single-cell analysis
Source: Research Square preprint supplement (doi:10.21203/rs.3.rs-7725271/v1), 2025-10-22
Supplement: Supplementary file 2 [file a800c7fd017cb4d6f4e0964e.docx]

**Online Resource 2**


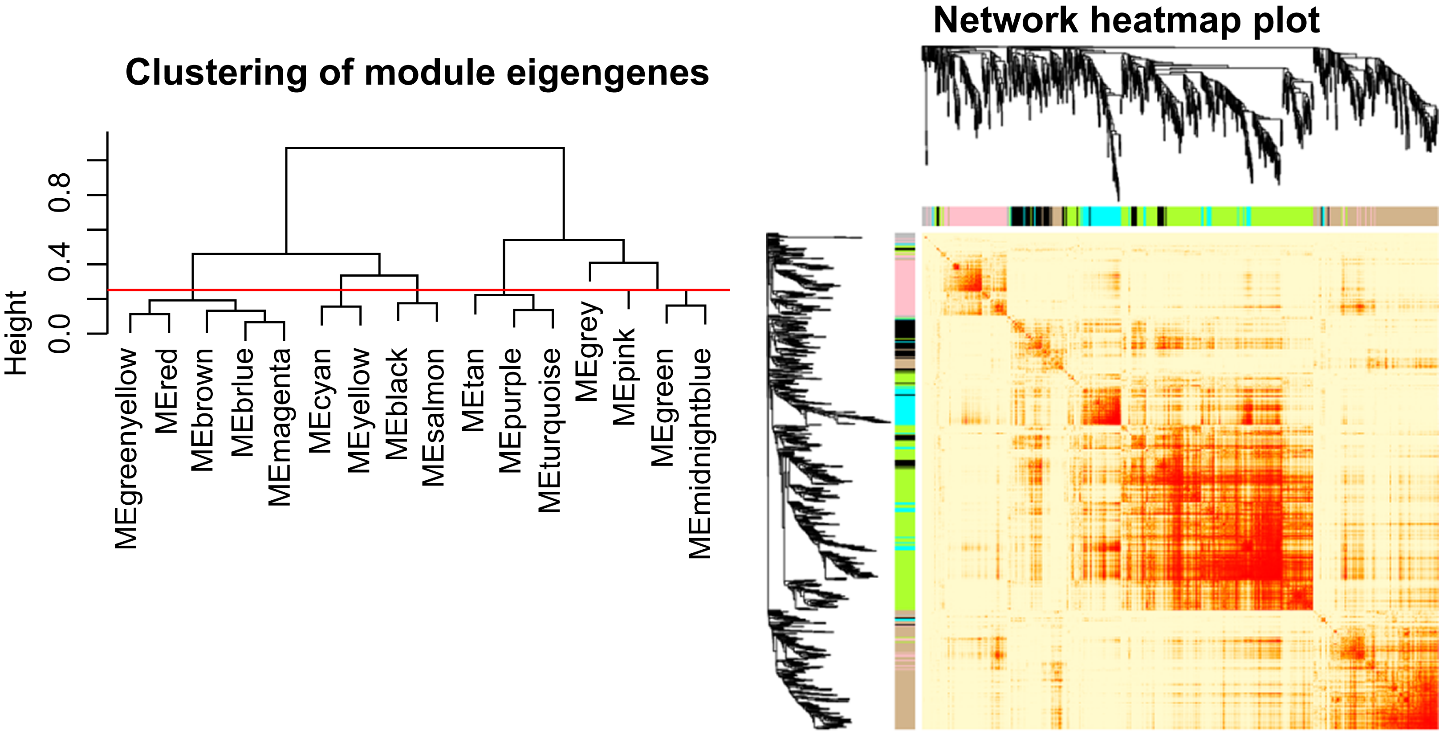


**Supplementary Figure S1 Identification and clustering of gene co-expression modules.** (**A**) Clustering of module eigengenes. Hierarchical clustering of module eigengenes was performed to assess the similarity between gene modules. Merging of highly correlated gene modules identified 19 distinct co-expression modules. Red line: merging threshold (cutHeight = 0.25). (**B**) Network heatmap showing the relationships between genes in different co-expression modules. Darker red: stronger relationships between gene modules.


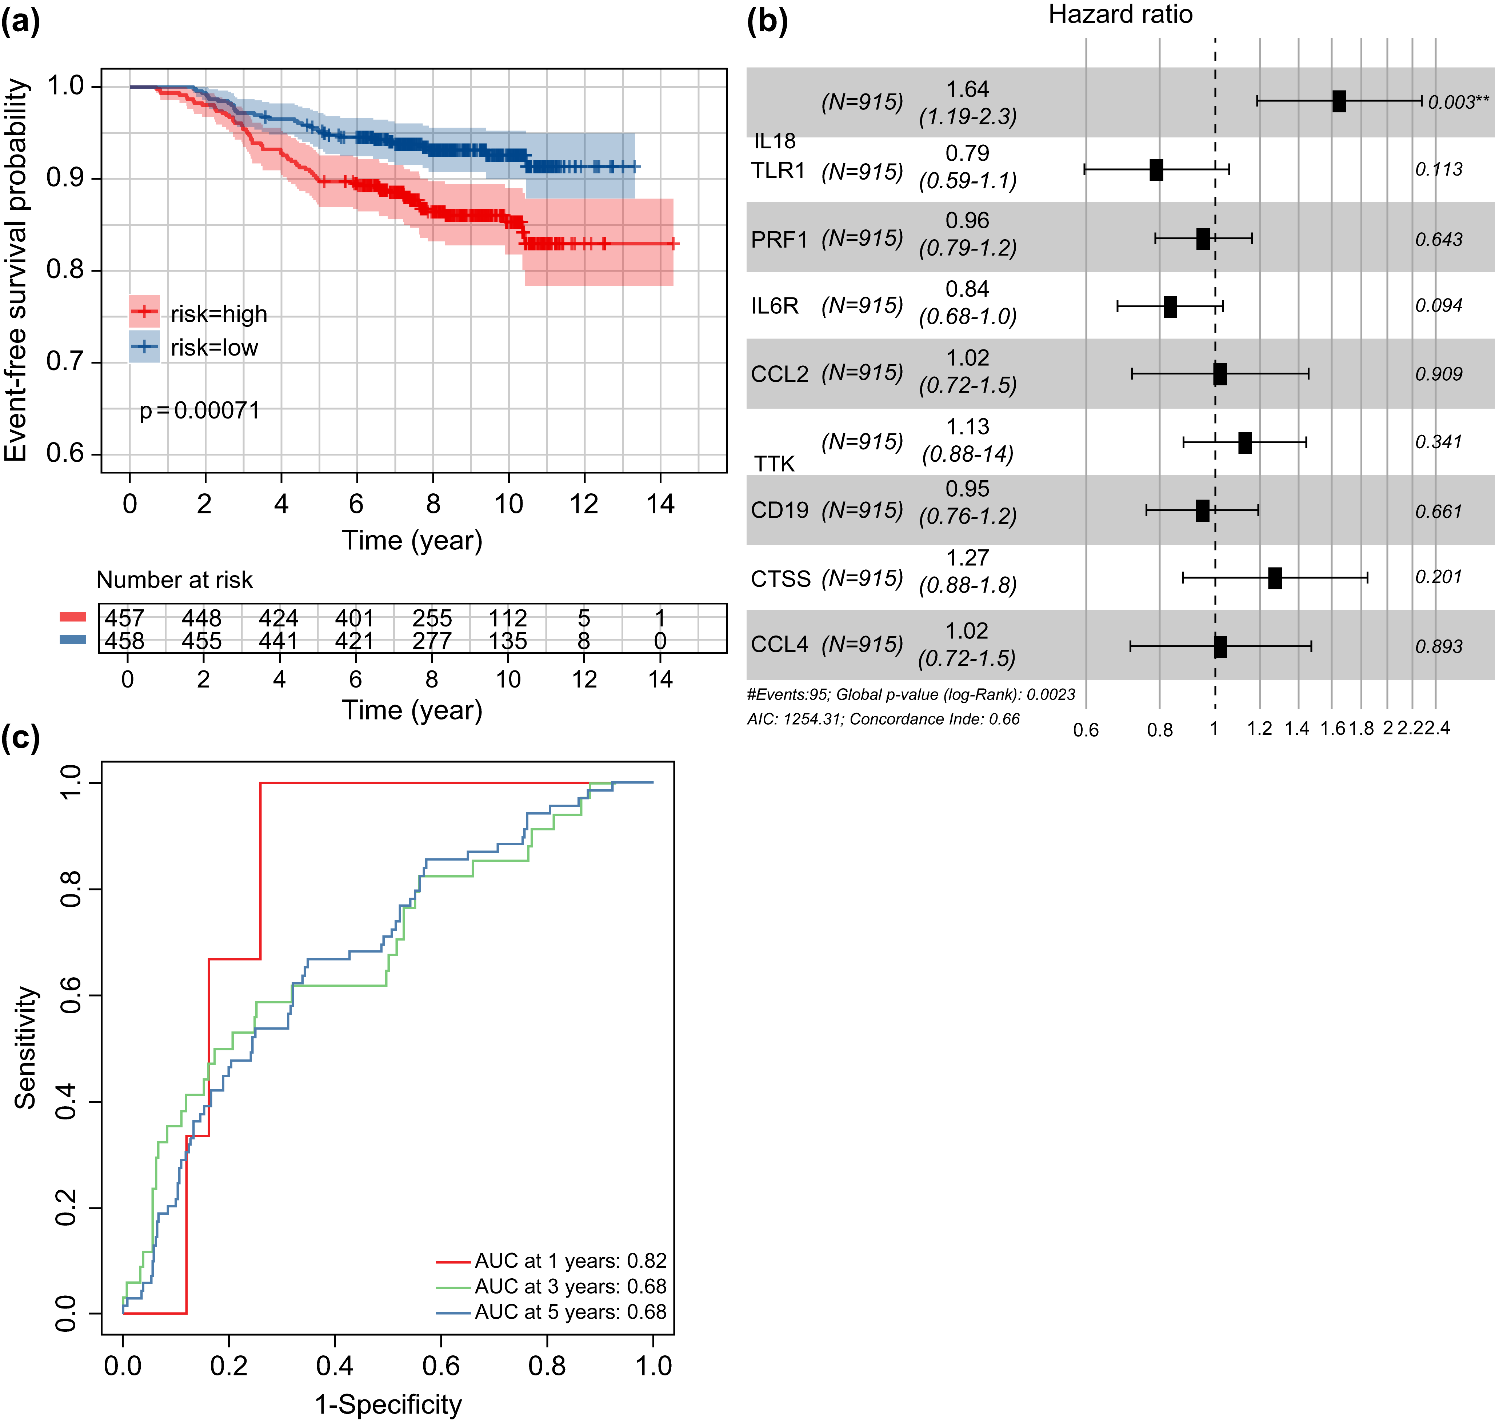


**Supplementary Figure S2 Validation and functional analysis of the prognostic model.** (**A–B**) Validation using the MP2PRT-ALL dataset. Time-dependent ROC curve analysis of the prognostic model showing AUC values of 0.82, 0.68, and 0.68 for one-, three-, and five-year survival, respectively. (**C**) Significantly poorer overall survival among patients in the high-risk group compared with those in the low-risk group. MP2PRT-ALL, Molecular Profiling to Predict Response to Therapy in Acute Lymphoblastic Leukemia; ROC, receiver operating characteristic; AUC, area under the curve


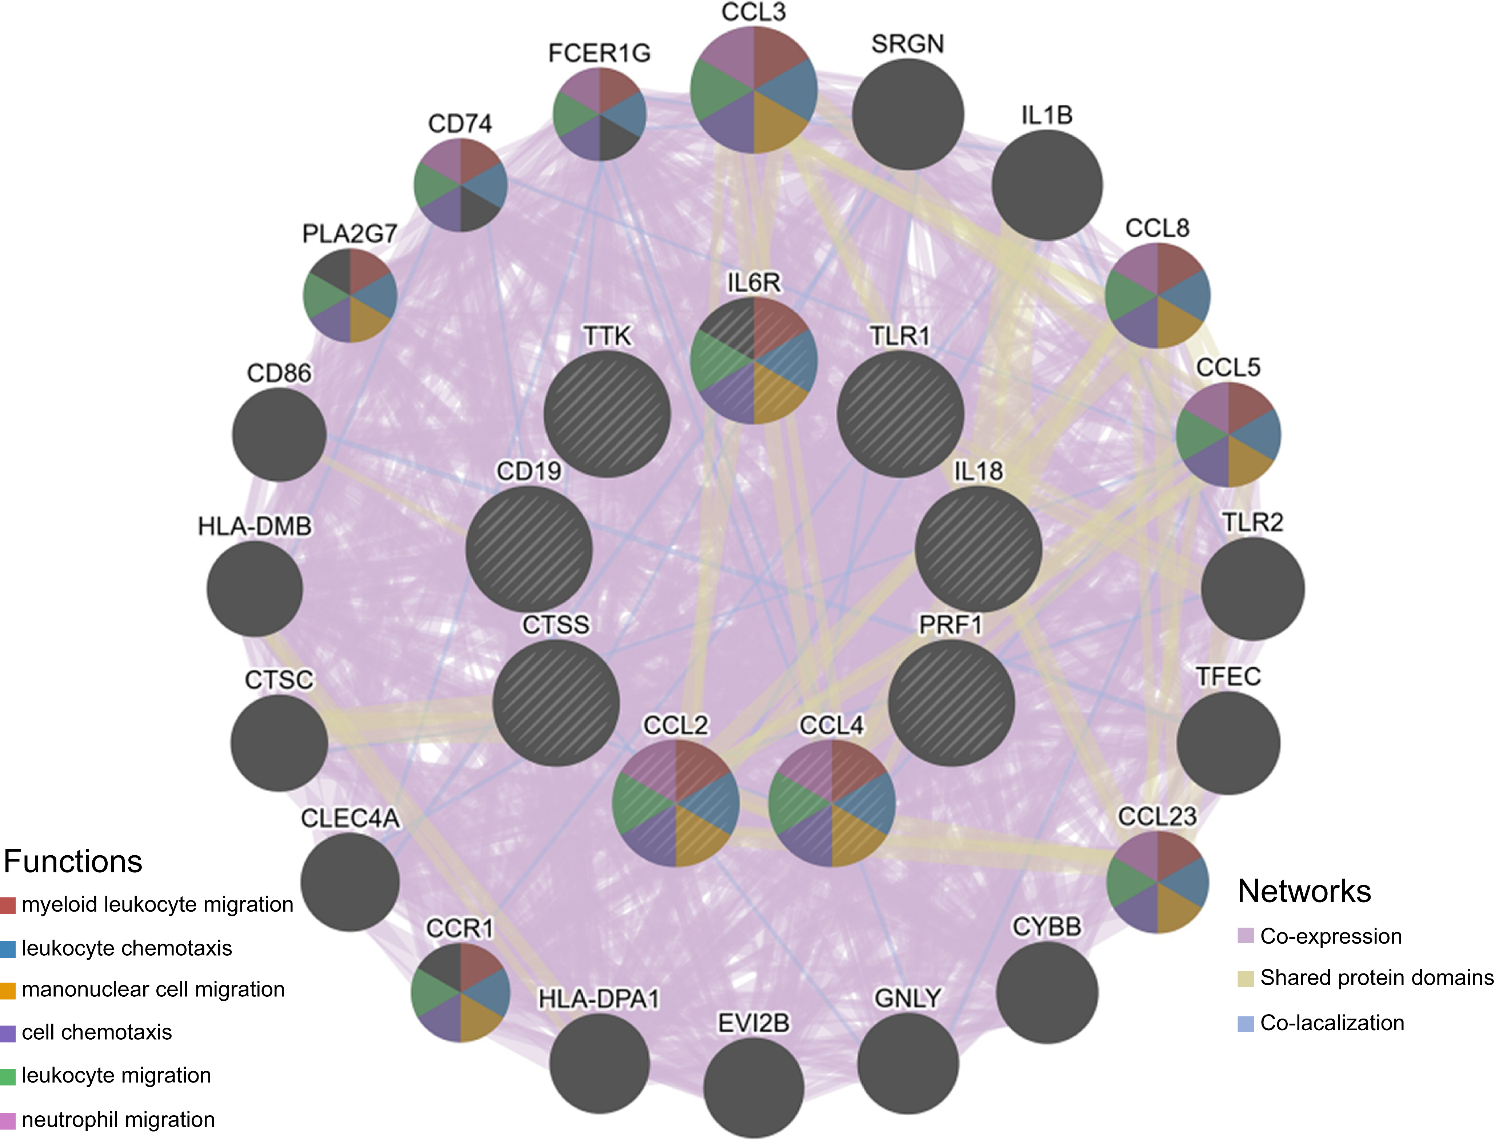


**Supplementary Figure S3 Gene co-expression network and functional enrichment analysis.** Using the GeneMANIA database, we identified functionally related genes and constructed a gene co-expression network.
